# Supplementary material for: SWATH-MS-based proteogenomic analysis reveals the involvement of alternative splicing in poplar upon lead stress
Source: HighWire-hosted journal article supplement (doi:10.1101/gr.277473.122), 2023-03-01
Supplement: Supplemental_Table.xlsx [file Supplemental_Table.xlsx]

## Sheet: Table 1-1
Supplemental Table S1: DEG list of Group1.
gene	control	treat	log2(Fold_change)	p-value	q-value	significant	Pos	Strand	Pos	Strand	KEGG_A_class	KEGG_B_class	Pathway	GO Component	GO Function	GO Process	Pfam	Panther	KOG	Best-hit-arabi-name	arabi-symbol	arabi-defline
Potri.017G114600	219.445	7066.97	5.00916	0	0	yes	Chr17:12218964-12220390	+	Chr17:12218964-12220390	+	09100 Metabolism	09101 Carbohydrate metabolism|09102 Energy metabolism	ko00630 Glyoxylate and dicarboxylate metabolism|ko00710 Carbon fixation in photosynthetic organisms	-	GO:0016984/ribulose-bisphosphate carboxylase activity	GO:0015977/carbon fixation	PF00101 PF12338|PF12338	PTHR31262 PTHR31262:SF4|PTHR31262 PTHR31262:SF4	EC:4.1.1.39|EC:4.1.1.39	AT5G38410|AT5G38410	Ribulose bisphosphate carboxylase (small chain) family protein|Ribulose bisphosphate carboxylase (small chain) family protein
Potri.001G102400	11637.1	3263.65	-1.83418	0	0	yes	Chr01:8273035-8274087	-	Chr01:8273035-8274087	-	-	-	-	-	-	-	PF00314	PTHR31048 PTHR31048:SF19		AT4G11650	osmotin 34
Potri.010G150700	158.975	3747.05	4.55888	0	0	yes	Chr10:16086480-16087402	+	Chr10:16086480-16087402	+	-	-	-	-	-	-	PF07876	PTHR33178
Potri.010G150800	112.235	3268.41	4.86399	0	0	yes	Chr10:16101971-16103354	+	Chr10:16101971-16103354	+	-	-	-	-	-	-	PF07876	PTHR33178
Potri.001G288600	3175.06	176.469	-4.16929	0	0	yes	Chr01:30078148-30078792	+	Chr01:30078148-30078792	+	09130 Environmental Information Processing|09150 Organismal Systems	09132 Signal transduction|09159 Environmental adaptation	ko04016 MAPK signaling pathway - plant|ko04075 Plant hormone signal transduction|ko04626 Plant-pathogen interaction	-	-	-	PF00188|PF00188	PTHR10334 PTHR10334:SF223|PTHR10334 PTHR10334:SF223		AT4G33720|AT4G33720	CAP (Cysteine-rich secretory proteins, Antigen 5, and Pathogenesis-related 1 protein) superfamily protein|CAP (Cysteine-rich secretory proteins, Antigen 5, and Pathogenesis-related 1 protein) superfamily protein
Potri.005G190101	3195.64	218.565	-3.86997	0	0	yes	Chr05:19777094-19778649	+	Chr05:19777094-19778649	+	-	-	-	-	-	-
Potri.001G400200	41.5579	2708.64	6.0263	0	0	yes	Chr01:42644273-42644473	+	Chr01:42644273-42644473	+	-	-	-	-	-	-
Potri.001G288301	3736.76	560.253	-2.73764	0	0	yes	Chr01:30050461-30051147	+	Chr01:30050461-30051147	+	09130 Environmental Information Processing|09150 Organismal Systems	09132 Signal transduction|09159 Environmental adaptation	ko04016 MAPK signaling pathway - plant|ko04075 Plant hormone signal transduction|ko04626 Plant-pathogen interaction	-	-	-	PF00188	PTHR10334 PTHR10334:SF223		AT4G33720	CAP (Cysteine-rich secretory proteins, Antigen 5, and Pathogenesis-related 1 protein) superfamily protein
Potri.005G239300	362.816	3477.08	3.26056	0	0	yes	Chr05:23653661-23654578	+	Chr05:23653661-23654578	+	09100 Metabolism|09180 Brite Hierarchies	09102 Energy metabolism|09181 Protein families: metabolism	ko00196 Photosynthesis - antenna proteins|ko00194 Photosynthesis proteins	GO:0016020/membrane	-	GO:0009765/photosynthesis, light harvesting	PF00504|PF00504	PTHR21649 PTHR21649:SF26|PTHR21649 PTHR21649:SF26		AT2G34420|AT2G34420	photosystem II light harvesting complex gene B1B2|photosystem II light harvesting complex gene B1B2
Potri.002G070101	2911.74	271.02	-3.42541	0	0	yes	Chr02:4894619-4896455	-	Chr02:4894619-4896455	-	-	-	-	-	-	-
Potri.011G079500	86.189	2497.91	4.85708	0	0	yes	Chr11:8562154-8563105	-	Chr11:8562154-8563105	-	09100 Metabolism|09180 Brite Hierarchies	09102 Energy metabolism|09181 Protein families: metabolism	ko00196 Photosynthesis - antenna proteins|ko00194 Photosynthesis proteins	GO:0016020/membrane	-	GO:0009765/photosynthesis, light harvesting	PF00504	PTHR21649 PTHR21649:SF26		AT2G34420	photosystem II light harvesting complex gene B1B2
Potri.010G150500	127.356	2572.92	4.33646	0	0	yes	Chr10:16081280-16081819	+	Chr10:16081280-16081819	+	-	-	-	-	-	-	PF07876	PTHR33178
Potri.004G100000	34.3786	2308.92	6.06957	0	0	yes	Chr04:8647104-8648787	-	Chr04:8647104-8648787	-	09100 Metabolism	09101 Carbohydrate metabolism|09102 Energy metabolism	ko00630 Glyoxylate and dicarboxylate metabolism|ko00710 Carbon fixation in photosynthetic organisms	-	GO:0016984/ribulose-bisphosphate carboxylase activity	GO:0015977/carbon fixation	PF00101 PF12338	PTHR31262 PTHR31262:SF4	EC:4.1.1.39	AT5G38410	Ribulose bisphosphate carboxylase (small chain) family protein
Potri.010G200500	20.8907	2190.43	6.7122	0	0	yes	Chr10:19289624-19292919	+	Chr10:19289624-19292919	+	-	-	-	-	GO:0005524/ATP binding	-	PF00004|PF00004	PTHR32429 PTHR32429:SF12|PTHR32429 PTHR32429:SF12		AT2G39730|AT2G39730	rubisco activase|rubisco activase
Potri.019G100001	1874.77	27.44	-6.09429	0	0	yes	Chr19:13665246-13665858	+	Chr19:13665246-13665858	+	-	-	-	-	-	-	PF01439	PTHR33543		AT5G02380	metallothionein 2B
Potri.013G131200	1979.07	141.655	-3.80437	0	0	yes	Chr13:13754240-13754832	+	Chr13:13754240-13754832	+	-	-	-	-	GO:0046872/metal ion binding	-	PF01439	PTHR33543
Potri.013G101000	678.627	3367.77	2.3111	0	0	yes	Chr13:10855023-10857205	-	Chr13:10855023-10857205	-	-	-	-	-	GO:0003824/catalytic activity	GO:0009116/nucleoside metabolic process	PF01048	PTHR21234 PTHR21234:SF30	EC:3.2.2.9
Potri.010G142800	3108.55	701.46	-2.14781	0	0	yes	Chr10:15569816-15572336	+	Chr10:15569816-15572336	+	-	-	-	-	GO:0004553/hydrolase activity, hydrolyzing O-glycosyl compounds	GO:0005975/carbohydrate metabolic process	PF00332	PTHR32227 PTHR32227:SF125	EC:3.2.1.39	AT4G16260	Glycosyl hydrolase superfamily protein
Potri.004G218400	154.096	1956.63	3.66647	0	0	yes	Chr04:22445092-22445865	+	Chr04:22445092-22445865	+	09100 Metabolism|09180 Brite Hierarchies	09102 Energy metabolism|09181 Protein families: metabolism	ko00195 Photosynthesis|ko00194 Photosynthesis proteins	-	GO:0009055/electron transfer activity|GO:0051536/iron-sulfur cluster binding	-	PF00111	PTHR19370 PTHR19370:SF120		AT1G10960	ferredoxin 1
Potri.014G172400	159.709	1874.52	3.553	0	0	yes	Chr14:12815789-12817577	-	Chr14:12815789-12817577	-	09100 Metabolism|09180 Brite Hierarchies	09102 Energy metabolism|09181 Protein families: metabolism	ko00196 Photosynthesis - antenna proteins|ko00194 Photosynthesis proteins	GO:0016020/membrane	-	GO:0009765/photosynthesis, light harvesting	PF00504	PTHR21649 PTHR21649:SF14		AT1G61520	photosystem I light harvesting complex gene 3
Potri.011G025400	2160.82	382.803	-2.49691	0	0	yes	Chr11:1891029-1893894	-	Chr11:1891029-1893894	-	09100 Metabolism|09130 Environmental Information Processing	09101 Carbohydrate metabolism|09132 Signal transduction	ko00040 Pentose and glucuronate interconversions|ko02020 Two-component system	GO:0005618/cell wall	GO:0004857/enzyme inhibitor activity|GO:0030599/pectinesterase activity	GO:0042545/cell wall modification	PF01095 PF04043	PTHR31707 PTHR31707:SF32	EC:3.1.1.11 EC:3.2.2.22	AT1G11580	methylesterase PCR A
Potri.005G239200	168.945	1731.73	3.35759	6.34496e-305	8.76989e-302	yes	Chr05:23651223-23652549	-	Chr05:23651223-23652549	-	09100 Metabolism|09180 Brite Hierarchies	09102 Energy metabolism|09181 Protein families: metabolism	ko00196 Photosynthesis - antenna proteins|ko00194 Photosynthesis proteins	GO:0016020/membrane	-	GO:0009765/photosynthesis, light harvesting	PF00504	PTHR21649 PTHR21649:SF26		AT2G34420	photosystem II light harvesting complex gene B1B2
Potri.008G151600	252.798	1885.11	2.89859	7.73325e-288	1.0224e-284	yes	Chr08:10398773-10399387	+	Chr08:10398773-10399387	+	09100 Metabolism|09180 Brite Hierarchies	09102 Energy metabolism|09181 Protein families: metabolism	ko00195 Photosynthesis|ko00194 Photosynthesis proteins	GO:0009538/photosystem I reaction center	-	GO:0015979/photosynthesis	PF02531	PTHR31982 PTHR31982:SF4		AT1G03130	photosystem I subunit D-2
Potri.009G028300	2925.76	861.477	-1.76393	2.00401e-286	2.53908e-283	yes	Chr09:3952685-3953262	+	Chr09:3952685-3953262	+	-	-	-	-	GO:0004867/serine-type endopeptidase inhibitor activity	GO:0009611/response to wounding	PF00280	PTHR33091 PTHR33091:SF14		AT2G38870	Serine protease inhibitor, potato inhibitor I-type family protein
Potri.001G400100	18.4439	1238.32	6.06909	7.51849e-285	9.14489e-282	yes	Chr01:42644518-42645117	-	Chr01:42644518-42645117	-	-	-	-	-	-	-		PTHR33357		AT3G15353	metallothionein 3
Potri.001G081500	194.933	1648.72	3.0803	5.35921e-268	6.2678e-265	yes	Chr01:6467789-6469323	-	Chr01:6467789-6469323	-	09100 Metabolism|09180 Brite Hierarchies	09102 Energy metabolism|09181 Protein families: metabolism	ko00195 Photosynthesis|ko00194 Photosynthesis proteins	GO:0009538/photosystem I reaction center	-	GO:0015979/photosynthesis	PF02507	PTHR34939 PTHR34939:SF1	EC:1.97.1.12	AT1G31330	photosystem I subunit F
Potri.019G063101	74.4974	1253.46	4.07259	5.0241e-256	5.65826e-253	yes	Chr19:10322088-10324946	-	Chr19:10322088-10324946	-	09100 Metabolism|09180 Brite Hierarchies	09102 Energy metabolism|09181 Protein families: metabolism	ko00196 Photosynthesis - antenna proteins|ko00194 Photosynthesis proteins	-	-	-	PF00504	PTHR21649 PTHR21649:SF16		AT4G10340	light harvesting complex of photosystem II 5
Potri.006G065500	79.0123	1264.88	4.00078	2.01046e-255	2.18336e-252	yes	Chr06:4696946-4698605	+	Chr06:4696946-4698605	+	-	-	-	-	-	-	PF14547|PF14547	PTHR31731|PTHR31731
Potri.010G075400	1012.95	12.3359	-6.35956	1.06057e-244	1.11206e-241	yes	Chr10:10334573-10335103	-	Chr10:10334573-10335103	-	-	-	-	-	GO:0004867/serine-type endopeptidase inhibitor activity	GO:0009611/response to wounding	PF00280	PTHR33091 PTHR33091:SF14		AT2G38870	Serine protease inhibitor, potato inhibitor I-type family protein
Potri.004G162400	19.024	1043.61	5.77762	1.14609e-240	1.16168e-237	yes	Chr04:18212324-18214996	+	Chr04:18212324-18214996	+	09100 Metabolism|09130 Environmental Information Processing|09180 Brite Hierarchies	09101 Carbohydrate metabolism|09102 Energy metabolism|09132 Signal transduction|09182 Protein families: genetic information processing|09183 Protein families: signaling and cellular processes	ko00010 Glycolysis / Gluconeogenesis|ko00030 Pentose phosphate pathway|ko00051 Fructose and mannose metabolism|ko00710 Carbon fixation in photosynthetic organisms|ko00680 Methane metabolism|ko04066 HIF-1 signaling pathway|ko04131 Membrane trafficking|ko03036 Chromosome and associated proteins|ko04147 Exosome	-	GO:0004332/fructose-bisphosphate aldolase activity	GO:0006096/glycolytic process	PF00274	PTHR11627 PTHR11627:SF15	EC:4.1.2.13	AT2G21330	fructose-bisphosphate aldolase 1
Potri.001G438700	12.4153	1048.43	6.39997	8.29049e-240	8.13217e-237	yes	Chr01:46477954-46480153	+	Chr01:46477954-46480153	+	09100 Metabolism|09180 Brite Hierarchies	09102 Energy metabolism|09181 Protein families: metabolism	ko00195 Photosynthesis|ko00194 Photosynthesis proteins	GO:0042651/thylakoid membrane|GO:0009654/photosystem II oxygen evolving complex	-	GO:0015979/photosynthesis	PF04725	PTHR34369 PTHR34369:SF2		AT1G79040	photosystem II subunit R
Potri.002G231250	988.572	33.0008	-4.90477	3.9959e-237	3.79711e-234	yes	Chr02:22285622-22290143	-	Chr02:22285622-22290143	-	-	-	-	-	-	-	PF01190 PF04554|PF01190 PF04554|PF01190 PF04554|PF01190 PF04554
Potri.014G159000	68.455	1134.55	4.05083	3.77776e-231	3.48104e-228	yes	Chr14:11266060-11267855	+	Chr14:11266060-11267855	+	09100 Metabolism	09105 Amino acid metabolism	ko00270 Cysteine and methionine metabolism	-	GO:0016706/oxidoreductase activity, acting on paired donors, with incorporation or reduction of molecular oxygen, 2-oxoglutarate as one donor, and incorporation of one atom each of oxygen into both donors|GO:0016491/oxidoreductase activity	GO:0055114/oxidation-reduction process	PF03171 PF14226	PTHR10209 PTHR10209:SF193	EC:1.14.17.4	AT1G05010	ethylene-forming enzyme
Potri.019G124750	706.1	2575.07	1.86667	3.9895e-226	3.56802e-223	yes	Chr19:14883129-14883963	+	Chr19:14883129-14883963	+	-	-	-	-	-	-	PF00197	PTHR33107 PTHR33107:SF5
Potri.018G025900	36.6078	995.004	4.76448	1.8106e-220	1.57305e-217	yes	Chr18:1915754-1916583	+	Chr18:1915754-1916583	+	-	-	-	-	-	-	PF00234	PTHR31731 PTHR31731:SF19
Potri.014G175600	102.972	1191.47	3.53243	1.16472e-219	9.83797e-217	yes	Chr14:13115354-13116695	+	Chr14:13115354-13116695	+	09100 Metabolism|09180 Brite Hierarchies	09102 Energy metabolism|09181 Protein families: metabolism	ko00195 Photosynthesis|ko00194 Photosynthesis proteins	GO:0009538/photosystem I reaction center	-	GO:0015979/photosynthesis	PF02605	PTHR34803 PTHR34803:SF2	EC:1.97.1.12	AT4G12800	photosystem I subunit l
Potri.003G111400	985.092	60.4602	-4.0262	1.0568e-217	8.6852e-215	yes	Chr03:13367513-13368302	-	Chr03:13367513-13368302	-	-	-	-	-	-	-	PF14547	PTHR31731 PTHR31731:SF26		AT1G62510	Bifunctional inhibitor/lipid-transfer protein/seed storage 2S albumin superfamily protein
Potri.002G221400	175.291	1368.48	2.96475	2.05103e-214	1.64126e-211	yes	Chr02:20569835-20572044	+	Chr02:20569835-20572044	+	09100 Metabolism|09180 Brite Hierarchies	09102 Energy metabolism|09181 Protein families: metabolism	ko00196 Photosynthesis - antenna proteins|ko00194 Photosynthesis proteins	GO:0016020/membrane	-	GO:0009765/photosynthesis, light harvesting	PF00504	PTHR21649 PTHR21649:SF8		AT3G27690	photosystem II light harvesting complex gene 2.3
Potri.006G008500	261.7	1566.3	2.58137	1.05278e-210	8.20847e-208	yes	Chr06:586214-603518	+	Chr06:586214-603518	+	-	-	-	-	-	-	PF14547|PF14547	PTHR31731 PTHR31731:SF16|PTHR31731 PTHR31731:SF16
Potri.002G196100	196.193	1372.17	2.80612	6.26072e-203	4.7594e-200	yes	Chr02:15892005-15892546	+	Chr02:15892005-15892546	+	-	-	-	-	-	-	PF02672|PF02672	PTHR33921 PTHR33921:SF2|PTHR33921 PTHR33921:SF2		AT2G47400|AT2G47400	CP12 domain-containing protein 1|CP12 domain-containing protein 1
Potri.014G149900	2357.6	790.251	-1.57694	1.50181e-199	1.11383e-196	yes	Chr14:10344326-10344637	+	Chr14:10344326-10344637	+	-	-	-	-	-	-	PF14368	PTHR33122 PTHR33122:SF5		AT5G48485	Bifunctional inhibitor/lipid-transfer protein/seed storage 2S albumin superfamily protein
Potri.015G062200	108.501	1089.87	3.32837	3.78155e-191	2.73784e-188	yes	Chr15:8676822-8682856	+	Chr15:8676822-8682856	+	09100 Metabolism|09180 Brite Hierarchies	09102 Energy metabolism|09181 Protein families: metabolism	ko00196 Photosynthesis - antenna proteins|ko00194 Photosynthesis proteins	GO:0016020/membrane	-	GO:0009765/photosynthesis, light harvesting	PF00504|PF00504	PTHR21649 PTHR21649:SF4|PTHR21649 PTHR21649:SF4		AT3G47470|AT3G47470	light-harvesting chlorophyll-protein complex I subunit A4|light-harvesting chlorophyll-protein complex I subunit A4
Potri.008G106400	952.033	87.8704	-3.43756	1.0485e-189	7.41458e-187	yes	Chr08:6720289-6725620	+	Chr08:6720289-6725620	+	09100 Metabolism	09103 Lipid metabolism	ko00592 alpha-Linolenic acid metabolism	-	GO:0020037/heme binding|GO:0004601/peroxidase activity	GO:0055114/oxidation-reduction process|GO:0006979/response to oxidative stress	PF03098	PTHR11903 PTHR11903:SF14		AT3G01420	Peroxidase superfamily protein
Potri.002G016000	57.6048	901.954	3.96879	9.36303e-182	6.47071e-179	yes	Chr02:970193-971209	+	Chr02:970193-971209	+	09100 Metabolism|09180 Brite Hierarchies	09102 Energy metabolism|09181 Protein families: metabolism	ko00195 Photosynthesis|ko00194 Photosynthesis proteins	-	GO:0009055/electron transfer activity|GO:0005507/copper ion binding	-	PF13473	PTHR34192 PTHR34192:SF2		AT1G76100	plastocyanin 1
Potri.002G253800	155.375	1172.11	2.91529	9.00307e-181	6.08367e-178	yes	Chr02:24271833-24272984	+	Chr02:24271833-24272984	+	09100 Metabolism|09180 Brite Hierarchies	09102 Energy metabolism|09181 Protein families: metabolism	ko00195 Photosynthesis|ko00194 Photosynthesis proteins	GO:0009538/photosystem I reaction center	-	GO:0015979/photosynthesis	PF02427	PTHR34549 PTHR34549:SF2		AT2G20260	photosystem I subunit E-2
Potri.006G099500	87.5987	965.154	3.46178	2.34492e-175	1.5501e-172	yes	Chr06:7614060-7615351	-	Chr06:7614060-7615351	-	09100 Metabolism|09180 Brite Hierarchies	09102 Energy metabolism|09181 Protein families: metabolism	ko00196 Photosynthesis - antenna proteins|ko00194 Photosynthesis proteins	GO:0016020/membrane	-	GO:0009765/photosynthesis, light harvesting	PF00504	PTHR21649 PTHR21649:SF6		AT5G01530	light harvesting complex photosystem II
Potri.005G218800	146.74	1123.65	2.93685	1.05713e-174	6.83942e-172	yes	Chr05:22150543-22151503	-	Chr05:22150543-22151503	-	09100 Metabolism|09180 Brite Hierarchies	09102 Energy metabolism|09181 Protein families: metabolism	ko00195 Photosynthesis|ko00194 Photosynthesis proteins	GO:0009507/chloroplast|GO:0009523/photosystem II	-	GO:0015979/photosynthesis	PF07123|PF07123|PF07123	PTHR34552|PTHR34552|PTHR34552 PTHR34552:SF1		AT2G30570|AT2G30570|AT2G30570	photosystem II reaction center W|photosystem II reaction center W|photosystem II reaction center W
Potri.009G114701	2190.44	774.303	-1.50025	1.73493e-173	1.09908e-170	yes	Chr09:9713684-9714856	+	Chr09:9713684-9714856	+	-	-	-	-	-	-	PF10950|PF10950	PTHR33731 PTHR33731:SF1|PTHR33731 PTHR33731:SF1
Potri.007G033700	134.896	1078.38	2.99894	2.36725e-171	1.46905e-168	yes	Chr07:2639790-2642044	-	Chr07:2639790-2642044	-	09100 Metabolism|09180 Brite Hierarchies	09102 Energy metabolism|09181 Protein families: metabolism	ko00195 Photosynthesis|ko00194 Photosynthesis proteins	GO:0019898/extrinsic component of membrane|GO:0009654/photosystem II oxygen evolving complex	GO:0005509/calcium ion binding	GO:0015979/photosynthesis	PF01716	PTHR34058 PTHR34058:SF1		AT5G66570	PS II oxygen-evolving complex 1
Potri.001G225800	817.992	67.046	-3.60886	4.09814e-169	2.49233e-166	yes	Chr01:24368855-24369392	+	Chr01:24368855-24369392	+	-	-	-	-	GO:0004869/cysteine-type endopeptidase inhibitor activity	-	PF00031	PTHR11413 PTHR11413:SF50		AT2G40880	cystatin A
Potri.002G207093	1337.42	312.792	-2.09617	4.71688e-163	2.81237e-160	yes	Chr02:17371213-17372329	-	Chr02:17371213-17372329	-	09100 Metabolism|09150 Organismal Systems|09160 Human Diseases|09180 Brite Hierarchies	09106 Metabolism of other amino acids|09111 Xenobiotics biodegradation and metabolism|09149 Aging|09161 Cancer: overview|09162 Cancer: specific types|09166 Cardiovascular disease|09176 Drug resistance: antineoplastic|09183 Protein families: signaling and cellular processes	ko00480 Glutathione metabolism|ko00980 Metabolism of xenobiotics by cytochrome P450|ko00982 Drug metabolism - cytochrome P450|ko00983 Drug metabolism - other enzymes|ko04212 Longevity regulating pathway - worm|ko05200 Pathways in cancer|ko05204 Chemical carcinogenesis|ko05225 Hepatocellular carcinoma|ko05418 Fluid shear stress and atherosclerosis|ko01524 Platinum drug resistance|ko02000 Transport…	-	-	-	PF00043 PF02798	PTHR11260 PTHR11260:SF201	EC:2.5.1.18	AT4G02520	glutathione S-transferase PHI 2
Potri.001G056700	28.3406	731.088	4.6891	1.63716e-161	9.57362e-159	yes	Chr01:4260710-4262961	-	Chr01:4260710-4262961	-	09100 Metabolism|09180 Brite Hierarchies	09102 Energy metabolism|09181 Protein families: metabolism	ko00196 Photosynthesis - antenna proteins|ko00194 Photosynthesis proteins	GO:0016020/membrane	-	GO:0009765/photosynthesis, light harvesting	PF00504	PTHR21649 PTHR21649:SF13		AT3G61470	photosystem I light harvesting complex gene 2
Potri.001G256900	78.9358	879.8	3.47842	1.14807e-160	6.5869e-158	yes	Chr01:27285494-27286220	+	Chr01:27285494-27286220	+	-	-	-	-	-	-		PTHR34940		AT3G21055	photosystem II subunit T
Potri.010G221100	101.87	938.133	3.20307	3.71356e-159	2.09114e-156	yes	Chr10:20625794-20627550	+	Chr10:20625794-20627550	+	09100 Metabolism|09180 Brite Hierarchies	09102 Energy metabolism|09181 Protein families: metabolism	ko00196 Photosynthesis - antenna proteins|ko00194 Photosynthesis proteins	GO:0016020/membrane	-	GO:0009765/photosynthesis, light harvesting	PF00504	PTHR21649 PTHR21649:SF7		AT3G54890	photosystem I light harvesting complex gene 1
Potri.002G220566	17.4203	692.598	5.31318	5.94168e-159	3.28499e-156	yes	Chr02:20065474-20068599	+	Chr02:20065474-20068599	+	09100 Metabolism	09102 Energy metabolism	ko00710 Carbon fixation in photosynthetic organisms	-	-	-	PF00044 PF02800	PTHR10836 PTHR10836:SF49	EC:1.2.1.12 EC:1.2.1.13	AT1G12900	glyceraldehyde 3-phosphate dehydrogenase A subunit 2
Potri.011G142200	8.50699	687.98	6.33757	2.41989e-158	1.314e-155	yes	Chr11:17215154-17217206	+	Chr11:17215154-17217206	+	09100 Metabolism|09180 Brite Hierarchies	09102 Energy metabolism|09181 Protein families: metabolism	ko00195 Photosynthesis|ko00194 Photosynthesis proteins	GO:0042651/thylakoid membrane|GO:0009654/photosystem II oxygen evolving complex	-	GO:0015979/photosynthesis	PF04725|PF04725	PTHR34369 PTHR34369:SF2|PTHR34369		AT1G79040|AT1G79040|AT1G79040	photosystem II subunit R|photosystem II subunit R|photosystem II subunit R
Potri.015G003600	821.377	1.4813	-9.11504	2.40626e-156	1.28368e-153	yes	Chr15:224994-226646	-	Chr15:224994-226646	-	09100 Metabolism	09110 Biosynthesis of other secondary metabolites	ko00940 Phenylpropanoid biosynthesis	-	GO:0020037/heme binding|GO:0004601/peroxidase activity	GO:0055114/oxidation-reduction process|GO:0006979/response to oxidative stress	PF00141	PTHR31235	EC:1.11.1.7
Potri.010G111000	911.471	125.56	-2.85982	1.83403e-155	9.6154e-153	yes	Chr10:13106017-13107629	-	Chr10:13106017-13107629	-	-	-	-	-	-	GO:0009607/response to biotic stimulus|GO:0006952/defense response	PF00407	PTHR31907 PTHR31907:SF4		AT1G23130	Polyketide cyclase/dehydrase and lipid transport superfamily protein
Potri.004G085400	16.1316	646.877	5.32553	1.1762e-148	6.06201e-146	yes	Chr04:7093799-7097153	+	Chr04:7093799-7097153	+	09100 Metabolism|09130 Environmental Information Processing|09140 Cellular Processes|09150 Organismal Systems|09180 Brite Hierarchies	09101 Carbohydrate metabolism|09102 Energy metabolism|09105 Amino acid metabolism|09132 Signal transduction|09143 Cell growth and death|09156 Nervous system|09183 Protein families: signaling and cellular processes	ko00630 Glyoxylate and dicarboxylate metabolism|ko00910 Nitrogen metabolism|ko00250 Alanine, aspartate and glutamate metabolism|ko00220 Arginine biosynthesis|ko02020 Two-component system|ko04217 Necroptosis|ko04724 Glutamatergic synapse|ko04727 GABAergic synapse|ko04147 Exosome	-	GO:0004356/glutamate-ammonia ligase activity	GO:0006542/glutamine biosynthetic process|GO:0006807/nitrogen compound metabolic process	PF00120 PF03951	PTHR20852 PTHR20852:SF59	EC:6.3.1.2
Potri.002G055700	61.65	768.923	3.64067	6.45874e-146	3.27329e-143	yes	Chr02:3802118-3804481	+	Chr02:3802118-3804481	+	09100 Metabolism|09180 Brite Hierarchies	09102 Energy metabolism|09181 Protein families: metabolism	ko00195 Photosynthesis|ko00194 Photosynthesis proteins	GO:0019898/extrinsic component of membrane|GO:0009654/photosystem II oxygen evolving complex	GO:0005509/calcium ion binding	GO:0015979/photosynthesis	PF01789	PTHR31407 PTHR31407:SF6		AT1G06680	photosystem II subunit P-1
Potri.005G130400	141.376	977.067	2.78892	4.26483e-144	2.12598e-141	yes	Chr05:10008601-10010578	-	Chr05:10008601-10010578	-	09100 Metabolism|09180 Brite Hierarchies	09102 Energy metabolism|09181 Protein families: metabolism	ko00195 Photosynthesis|ko00194 Photosynthesis proteins	GO:0019898/extrinsic component of membrane|GO:0009654/photosystem II oxygen evolving complex	GO:0005509/calcium ion binding	GO:0015979/photosynthesis	PF01716	PTHR34058 PTHR34058:SF1		AT5G66570	PS II oxygen-evolving complex 1
Potri.006G144000	180.354	1066.5	2.56398	5.92168e-143	2.9043e-140	yes	Chr06:12186420-12186785	-	Chr06:12186420-12186785	-	-	-	-	GO:0016020/membrane|GO:0009523/photosystem II	-	GO:0015979/photosynthesis	PF06596	PTHR34455 PTHR34455:SF1		AT2G06520	photosystem II subunit X
Potri.008G131100	642.457	42.5867	-3.91512	2.0853e-140	1.00651e-137	yes	Chr08:8626264-8627976	+	Chr08:8626264-8627976	+	-	-	-	-	-	GO:0009607/response to biotic stimulus|GO:0006952/defense response	PF00407	PTHR31338 PTHR31338:SF15		AT1G30990	Polyketide cyclase/dehydrase and lipid transport superfamily protein
Potri.004G031500	39.8872	680.649	4.09291	2.26351e-140	1.07545e-137	yes	Chr04:2428369-2430291	-	Chr04:2428369-2430291	-	09100 Metabolism|09180 Brite Hierarchies	09102 Energy metabolism|09181 Protein families: metabolism	ko00195 Photosynthesis|ko00194 Photosynthesis proteins	GO:0019898/extrinsic component of membrane|GO:0009654/photosystem II oxygen evolving complex	GO:0005509/calcium ion binding	GO:0015979/photosynthesis	PF05757	PTHR33399 PTHR33399:SF3		AT4G21280	photosystem II subunit QA
Potri.009G124100	68.8953	748.367	3.44127	9.90748e-136	4.63487e-133	yes	Chr09:10345161-10348245	+	Chr09:10345161-10348245	+	09100 Metabolism|09130 Environmental Information Processing|09180 Brite Hierarchies	09101 Carbohydrate metabolism|09102 Energy metabolism|09132 Signal transduction|09182 Protein families: genetic information processing|09183 Protein families: signaling and cellular processes	ko00010 Glycolysis / Gluconeogenesis|ko00030 Pentose phosphate pathway|ko00051 Fructose and mannose metabolism|ko00710 Carbon fixation in photosynthetic organisms|ko00680 Methane metabolism|ko04066 HIF-1 signaling pathway|ko04131 Membrane trafficking|ko03036 Chromosome and associated proteins|ko04147 Exosome	-	GO:0004332/fructose-bisphosphate aldolase activity	GO:0006096/glycolytic process	PF00274	PTHR11627 PTHR11627:SF15	EC:4.1.2.13	AT2G21330	fructose-bisphosphate aldolase 1
Potri.005G206700	151.999	957.286	2.65489	9.67405e-134	4.4571e-131	yes	Chr05:21152239-21154007	-	Chr05:21152239-21154007	-	09100 Metabolism|09180 Brite Hierarchies	09102 Energy metabolism|09181 Protein families: metabolism	ko00195 Photosynthesis|ko00194 Photosynthesis proteins	GO:0019898/extrinsic component of membrane|GO:0009654/photosystem II oxygen evolving complex	GO:0005509/calcium ion binding	GO:0015979/photosynthesis	PF01789	PTHR31407 PTHR31407:SF6		AT1G06680	photosystem II subunit P-1
Potri.012G006800	553.002	18.8209	-4.87688	2.47457e-133	1.12308e-130	yes	Chr12:271392-272970	-	Chr12:271392-272970	-	09100 Metabolism	09110 Biosynthesis of other secondary metabolites	ko00940 Phenylpropanoid biosynthesis	-	GO:0020037/heme binding|GO:0004601/peroxidase activity	GO:0055114/oxidation-reduction process|GO:0006979/response to oxidative stress	PF00141	PTHR31235	EC:1.11.1.7
Potri.006G212000	555.66	5.09482	-6.76903	1.11106e-132	4.96842e-130	yes	Chr06:21878068-21878619	-	Chr06:21878068-21878619	-	-	-	-	-	GO:0004867/serine-type endopeptidase inhibitor activity	GO:0009611/response to wounding	PF00280	PTHR33091 PTHR33091:SF1		AT2G38870	Serine protease inhibitor, potato inhibitor I-type family protein
Potri.003G052500	62.4764	713.059	3.51264	1.19823e-131	5.28053e-129	yes	Chr03:7727616-7729141	+	Chr03:7727616-7729141	+	09100 Metabolism|09180 Brite Hierarchies	09102 Energy metabolism|09181 Protein families: metabolism	ko00195 Photosynthesis|ko00194 Photosynthesis proteins	GO:0009538/photosystem I reaction center	-	GO:0015979/photosynthesis	PF03244	PTHR34787 PTHR34787:SF1		AT3G16140	photosystem I subunit H-1
Potri.019G124500	937.337	192.562	-2.28325	1.13906e-126	4.94809e-124	yes	Chr19:14878839-14879803	+	Chr19:14878839-14879803	+	-	-	-	-	GO:0004866/endopeptidase inhibitor activity	-	PF00197	PTHR33107 PTHR33107:SF5
Potri.019G050200	5.52303	547.445	6.63111	3.60335e-125	1.54325e-122	yes	Chr19:8306719-8308603	+	Chr19:8306719-8308603	+	-	-	-	-	GO:0003824/catalytic activity	GO:0009116/nucleoside metabolic process	PF01048	PTHR21234 PTHR21234:SF30	EC:3.2.2.16
Potri.006G245400	607.285	52.3269	-3.53675	2.78324e-124	1.17545e-121	yes	Chr06:24606234-24612090	-	Chr06:24606234-24612090	-	09120 Genetic Information Processing|09140 Cellular Processes|09160 Human Diseases|09180 Brite Hierarchies	09123 Folding, sorting and degradation|09143 Cell growth and death|09172 Infectious disease: viral|09182 Protein families: genetic information processing	ko04120 Ubiquitin mediated proteolysis|ko04115 p53 signaling pathway|ko05162 Measles|ko04121 Ubiquitin system	-	GO:0008270/zinc ion binding	-	PF05495 PF13639 PF14599|PF05495 PF13639 PF14599	PTHR21319 PTHR21319:SF15|PTHR21319 PTHR21319:SF15	EC:6.3.2.19|EC:6.3.2.19	AT5G25560|AT5G25560	CHY-type/CTCHY-type/RING-type Zinc finger protein|CHY-type/CTCHY-type/RING-type Zinc finger protein
Potri.003G214900	659.259	1.07736	-9.25719	1.34314e-123	5.5948e-121	yes	Chr03:21118277-21119947	+	Chr03:21118277-21119947	+	09100 Metabolism	09110 Biosynthesis of other secondary metabolites	ko00940 Phenylpropanoid biosynthesis	-	GO:0020037/heme binding|GO:0004601/peroxidase activity	GO:0055114/oxidation-reduction process|GO:0006979/response to oxidative stress	PF00141	PTHR31388 PTHR31388:SF22	EC:1.11.1.7	AT2G38380	Peroxidase superfamily protein
Potri.006G255600	48.2565	629.682	3.70583	1.77614e-121	7.2985e-119	yes	Chr06:25306396-25307416	+	Chr06:25306396-25307416	+	09100 Metabolism|09180 Brite Hierarchies	09102 Energy metabolism|09181 Protein families: metabolism	ko00190 Oxidative phosphorylation|ko00195 Photosynthesis|ko00194 Photosynthesis proteins	GO:0045263/proton-transporting ATP synthase complex, coupling factor F(o)	GO:0015078/proton transmembrane transporter activity	GO:0015986/ATP synthesis coupled proton transport	PF00430	PTHR33445		AT4G32260	ATPase, F0 complex, subunit B/B', bacterial/chloroplast
Potri.T008049	874.291	173.915	-2.32973	5.91569e-121	2.39846e-118	yes	scaffold_25:32493-33222	+	scaffold_25:32493-33222	+	-	-	-	-	-	-
Potri.008G058500	54.8054	644.924	3.55674	1.81941e-120	7.27955e-118	yes	Chr08:3490131-3493765	-	Chr08:3490131-3493765	-	-	-	-	-	GO:0005524/ATP binding	-	PF00004|PF00004|PF00004|PF00004|PF00004|PF00004|PF00004	PTHR32429 PTHR32429:SF12|PTHR32429 PTHR32429:SF12|PTHR32429 PTHR32429:SF8|PTHR32429 PTHR32429:SF8|PTHR32429 PTHR32429:SF8|PTHR32429 PTHR32429:SF8|PTHR32429 PTHR32429:SF8		AT2G39730|AT2G39730|AT2G39730|AT2G39730|AT2G39730|AT2G39730|AT2G39730	rubisco activase|rubisco activase|rubisco activase|rubisco activase|rubisco activase|rubisco activase|rubisco activase
Potri.019G038352	803.053	144.186	-2.47756	6.82384e-119	2.6948e-116	yes	Chr19:5297345-5298624	-	Chr19:5297345-5298624	-	-	-	-	-	-	-		PTHR34941
Potri.004G175800	31.7919	563.293	4.14715	1.94876e-117	7.59716e-115	yes	Chr04:19098777-19101881	+	Chr04:19098777-19101881	+	09100 Metabolism	09101 Carbohydrate metabolism|09105 Amino acid metabolism	ko00630 Glyoxylate and dicarboxylate metabolism|ko00260 Glycine, serine and threonine metabolism	-	GO:0048037/cofactor binding|GO:0004616/phosphogluconate dehydrogenase (decarboxylating) activity	GO:0055114/oxidation-reduction process|GO:0006098/pentose-phosphate shunt	PF00389 PF02826|PF00389 PF02826|PF00389 PF02826|PF02826	PTHR10996 PTHR10996:SF169|PTHR10996 PTHR10996:SF169|PTHR10996 PTHR10996:SF169|PTHR10996 PTHR10996:SF169	EC:1.1.1.29 EC:1.1.1.81|EC:1.1.1.29 EC:1.1.1.81|EC:1.1.1.29 EC:1.1.1.81|EC:1.1.1.29	AT1G68010|AT1G68010|AT1G68010|AT1G68010	hydroxypyruvate reductase|hydroxypyruvate reductase|hydroxypyruvate reductase|hydroxypyruvate reductase
Potri.004G067900	761.832	129.954	-2.55147	2.08803e-116	8.03706e-114	yes	Chr04:5774274-5775332	-	Chr04:5774274-5775332	-	-	-	-	-	GO:0004866/endopeptidase inhibitor activity	-	PF00197	PTHR33107 PTHR33107:SF5		AT1G17860	Kunitz family trypsin and protease inhibitor protein
Potri.005G254100	46.4589	602.92	3.69794	3.28106e-116	1.24713e-113	yes	Chr05:24601787-24604954	-	Chr05:24601787-24604954	-	09100 Metabolism	09102 Energy metabolism	ko00710 Carbon fixation in photosynthetic organisms	-	GO:0016620/oxidoreductase activity, acting on the aldehyde or oxo group of donors, NAD or NADP as acceptor	GO:0055114/oxidation-reduction process	PF00044 PF02672 PF02800	PTHR10836 PTHR10836:SF39	EC:1.2.1.13	AT1G42970	glyceraldehyde-3-phosphate dehydrogenase B subunit
Potri.005G117500	596.155	60.3615	-3.30399	6.1272e-116	2.3002e-113	yes	Chr05:8592281-8596119	-	Chr05:8592281-8596119	-	09100 Metabolism|09180 Brite Hierarchies	09110 Biosynthesis of other secondary metabolites|09181 Protein families: metabolism	ko00940 Phenylpropanoid biosynthesis|ko00199 Cytochrome P450	-	GO:0020037/heme binding|GO:0009055/electron transfer activity|GO:0016705/oxidoreductase activity, acting on paired donors, with incorporation or reduction of molecular oxygen	GO:0055114/oxidation-reduction process	PF00067|PF00067	PTHR24298 PTHR24298:SF73|PTHR24298 PTHR24298:SF73		AT4G36220|AT4G36220	ferulic acid 5-hydroxylase 1|ferulic acid 5-hydroxylase 1
Potri.004G199400	52.2326	618.87	3.56661	6.18278e-116	2.29276e-113	yes	Chr04:21019558-21021365	+	Chr04:21019558-21021365	+	09100 Metabolism|09180 Brite Hierarchies	09102 Energy metabolism|09181 Protein families: metabolism	ko00195 Photosynthesis|ko00194 Photosynthesis proteins	-	-	-		PTHR36311 PTHR36311:SF1	EC:1.97.1.12	AT1G08380	photosystem I subunit O
Potri.007G105900	45.9144	590.053	3.68383	1.91652e-113	7.02137e-111	yes	Chr07:12890724-12891583	-	Chr07:12890724-12891583	-	09100 Metabolism|09180 Brite Hierarchies	09102 Energy metabolism|09181 Protein families: metabolism	ko00195 Photosynthesis|ko00194 Photosynthesis proteins	GO:0042651/thylakoid membrane|GO:0009522/photosystem I	GO:0005516/calmodulin binding	GO:0015979/photosynthesis	PF05479	PTHR36814 PTHR36814:SF1		AT5G64040	photosystem I reaction center subunit PSI-N, chloroplast, putative / PSI-N, putative (PSAN)
Potri.010G052000	71.909	662.145	3.2029	6.69473e-113	2.42349e-110	yes	Chr10:8362736-8363857	+	Chr10:8362736-8363857	+	09100 Metabolism|09180 Brite Hierarchies	09102 Energy metabolism|09181 Protein families: metabolism	ko00195 Photosynthesis|ko00194 Photosynthesis proteins	GO:0016021/integral component of membrane|GO:0009523/photosystem II	GO:0030145/manganese ion binding	GO:0015979/photosynthesis	PF06298	PTHR34790 PTHR34790:SF1		AT1G67740	photosystem II BY
Potri.001G066400	69.1588	649.215	3.23071	1.27633e-111	4.56595e-109	yes	Chr01:4977534-4979088	-	Chr01:4977534-4979088	-	-	-	-	-	-	-	PF07207	PTHR36762 PTHR36762:SF2		AT3G26740	CCR-like
Potri.010G150900	68.2564	626.266	3.19774	9.98188e-107	3.52941e-104	yes	Chr10:16105199-16106209	+	Chr10:16105199-16106209	+	-	-	-	-	-	-	PF07876	PTHR33178
Potri.001G462200	431.727	7.5904	-5.8298	1.05853e-106	3.69973e-104	yes	Chr01:48807539-48809227	+	Chr01:48807539-48809227	+	-	-	-	-	GO:0008762/UDP-N-acetylmuramate dehydrogenase activity|GO:0016491/oxidoreductase activity|GO:0050660/flavin adenine dinucleotide binding	GO:0055114/oxidation-reduction process	PF01565 PF08031	PTHR32448 PTHR32448:SF25	EC:1.3.3.8	AT1G30700	FAD-binding Berberine family protein
Potri.001G394400	12.1809	458.793	5.23515	1.2069e-105	4.17039e-103	yes	Chr01:41821771-41826511	-	Chr01:41821771-41826511	-	09100 Metabolism|09140 Cellular Processes	09101 Carbohydrate metabolism|09141 Transport and catabolism	ko00630 Glyoxylate and dicarboxylate metabolism|ko04146 Peroxisome	-	GO:0016491/oxidoreductase activity|GO:0018580/nitronate monooxygenase activity	GO:0055114/oxidation-reduction process	PF01070|PF01070|PF01070|PF01070	PTHR10578 PTHR10578:SF70|PTHR10578 PTHR10578:SF70|PTHR10578 PTHR10578:SF70|PTHR10578 PTHR10578:SF70	EC:1.1.3.15|EC:1.1.3.15|EC:1.1.3.15|EC:1.1.3.15	AT3G14415|AT3G14415|AT3G14415|AT3G14415	Aldolase-type TIM barrel family protein|Aldolase-type TIM barrel family protein|Aldolase-type TIM barrel family protein|Aldolase-type TIM barrel family protein
Potri.008G189400	0	815.625	11.486	1.81247e-105	6.19253e-103	yes	Chr08:13285651-13287729	+	Chr08:13285651-13287729	+	09100 Metabolism	09101 Carbohydrate metabolism	ko00052 Galactose metabolism	-	GO:0016757/transferase activity, transferring glycosyl groups	-	PF01501	PTHR11183 PTHR11183:SF53	EC:2.4.1.123	AT1G60470	galactinol synthase 4
Potri.010G161200	159.562	843.901	2.40295	4.30895e-105	1.45585e-102	yes	Chr10:16675186-16676125	-	Chr10:16675186-16676125	-	-	-	-	-	-	-		PTHR35098 PTHR35098:SF1		AT2G03440	nodulin-related protein 1
Potri.005G251600	600.469	80.5273	-2.89854	2.28086e-104	7.62159e-102	yes	Chr05:24450617-24453982	+	Chr05:24450617-24453982	+	09100 Metabolism|09130 Environmental Information Processing|09140 Cellular Processes|09150 Organismal Systems|09160 Human Diseases	09101 Carbohydrate metabolism|09105 Amino acid metabolism|09132 Signal transduction|09141 Transport and catabolism|09149 Aging|09164 Neurodegenerative disease	ko00630 Glyoxylate and dicarboxylate metabolism|ko00380 Tryptophan metabolism|ko04016 MAPK signaling pathway - plant|ko04011 MAPK signaling pathway - yeast|ko04068 FoxO signaling pathway|ko04146 Peroxisome|ko04211 Longevity regulating pathway|ko04212 Longevity regulating pathway - worm|ko04213 Longevity regulating pathway - multiple species|ko05014 Amyotrophic lateral sclerosis (ALS)	-	GO:0020037/heme binding|GO:0004096/catalase activity	GO:0055114/oxidation-reduction process	PF00199 PF06628	PTHR11465 PTHR11465:SF19	EC:1.11.1.21 EC:1.11.1.6	AT4G35090	catalase 2
Potri.001G407100	39.8161	530.951	3.73715	2.23569e-103	7.38945e-101	yes	Chr01:43446176-43447767	-	Chr01:43446176-43447767	-	09100 Metabolism|09180 Brite Hierarchies	09102 Energy metabolism|09181 Protein families: metabolism	ko00196 Photosynthesis - antenna proteins|ko00194 Photosynthesis proteins	GO:0016020/membrane	-	GO:0009765/photosynthesis, light harvesting	PF00504	PTHR21649 PTHR21649:SF11		AT5G54270	light-harvesting chlorophyll B-binding protein 3
Potri.003G066400	4.99135	447.408	6.48602	3.31958e-103	1.0854e-100	yes	Chr03:9348557-9350901	-	Chr03:9348557-9350901	-	-	-	-	-	GO:0020037/heme binding|GO:0009055/electron transfer activity|GO:0016705/oxidoreductase activity, acting on paired donors, with incorporation or reduction of molecular oxygen	GO:0055114/oxidation-reduction process	PF00067	PTHR24298 PTHR24298:SF51	EC:1.14.13.21
Potri.017G110800	508.628	46.2116	-3.46028	9.19871e-103	2.97569e-100	yes	Chr17:11836867-11837764	+	Chr17:11836867-11837764	+	-	-	-	-	-	-		PTHR34023
Potri.016G115200	157.746	827.243	2.39071	2.04886e-102	6.55806e-100	yes	Chr16:11964722-11966147	-	Chr16:11964722-11966147	-	09100 Metabolism|09180 Brite Hierarchies	09102 Energy metabolism|09181 Protein families: metabolism	ko00196 Photosynthesis - antenna proteins|ko00194 Photosynthesis proteins	GO:0016020/membrane	-	GO:0009765/photosynthesis, light harvesting	PF00504	PTHR21649 PTHR21649:SF6		AT5G01530	light harvesting complex photosystem II
Potri.016G015500	855.123	210.913	-2.01949	2.10436e-100	6.66556e-98	yes	Chr16:811594-813734	-	Chr16:811594-813734	-	-	-	-	-	-	-	PF14547	PTHR31731 PTHR31731:SF16		AT3G22120	cell wall-plasma membrane linker protein
Potri.001G471900	89.2242	648.671	2.86198	5.47857e-99	1.71745e-96	yes	Chr01:49478425-49479332	+	Chr01:49478425-49479332	+	09100 Metabolism|09180 Brite Hierarchies	09102 Energy metabolism|09181 Protein families: metabolism	ko00195 Photosynthesis|ko00194 Photosynthesis proteins	GO:0016020/membrane|GO:0009522/photosystem I	-	GO:0015979/photosynthesis	PF01241	PTHR34195 PTHR34195:SF1		AT1G55670	photosystem I subunit G
Potri.018G089200	0	628.945	10.2968	1.18105e-98	3.66464e-96	yes	Chr18:10832861-10834752	-	Chr18:10832861-10834752	-	-	-	-	-	GO:0016788/hydrolase activity, acting on ester bonds	GO:0006629/lipid metabolic process	PF00657	PTHR22835 PTHR22835:SF157	EC:3.1.1.3
Potri.006G165700	669.952	125.954	-2.41116	1.14455e-96	3.51551e-94	yes	Chr06:16270920-16273478	-	Chr06:16270920-16273478	-	09100 Metabolism|09130 Environmental Information Processing|09180 Brite Hierarchies	09101 Carbohydrate metabolism|09102 Energy metabolism|09132 Signal transduction|09182 Protein families: genetic information processing|09183 Protein families: signaling and cellular processes	ko00010 Glycolysis / Gluconeogenesis|ko00030 Pentose phosphate pathway|ko00051 Fructose and mannose metabolism|ko00710 Carbon fixation in photosynthetic organisms|ko00680 Methane metabolism|ko04066 HIF-1 signaling pathway|ko04131 Membrane trafficking|ko03036 Chromosome and associated proteins|ko04147 Exosome	-	GO:0004332/fructose-bisphosphate aldolase activity	GO:0006096/glycolytic process	PF00274	PTHR11627	EC:4.1.2.13	AT3G52930	Aldolase superfamily protein
Potri.011G112700	66.3857	578.097	3.12237	1.78306e-96	5.42191e-94	yes	Chr11:14295029-14299829	-	Chr11:14295029-14299829	-	09100 Metabolism|09140 Cellular Processes	09101 Carbohydrate metabolism|09141 Transport and catabolism	ko00630 Glyoxylate and dicarboxylate metabolism|ko04146 Peroxisome	-	GO:0016491/oxidoreductase activity|GO:0018580/nitronate monooxygenase activity	GO:0055114/oxidation-reduction process	PF01070|PF01070|PF01070|PF01070	PTHR10578 PTHR10578:SF70|PTHR10578 PTHR10578:SF70|PTHR10578 PTHR10578:SF81|PTHR10578 PTHR10578:SF81	EC:1.1.3.15|EC:1.1.3.15|EC:1.1.3.15|EC:1.1.3.15	AT3G14415|AT3G14415|AT3G14415|AT3G14415	Aldolase-type TIM barrel family protein|Aldolase-type TIM barrel family protein|Aldolase-type TIM barrel family protein|Aldolase-type TIM barrel family protein
Potri.010G089400	96.8089	647.673	2.74205	2.04964e-94	6.17085e-92	yes	Chr10:11438572-11439872	-	Chr10:11438572-11439872	-	09100 Metabolism|09180 Brite Hierarchies	09102 Energy metabolism|09181 Protein families: metabolism	ko00195 Photosynthesis|ko00194 Photosynthesis proteins	GO:0009538/photosystem I reaction center	-	GO:0015979/photosynthesis	PF02531	PTHR31982		AT1G03130	photosystem I subunit D-2
Potri.008G114101	162.67	797.087	2.29279	9.12794e-94	2.7212e-91	yes	Chr08:7257467-7258147	-	Chr08:7257467-7258147	-	-	-	-	-	-	-		PTHR35831
Potri.009G110800	445.164	36.1768	-3.6212	3.87059e-93	1.14269e-90	yes	Chr09:9498084-9499310	-	Chr09:9498084-9499310	-	-	-	-	-	GO:0020037/heme binding	-	PF00042	PTHR22924		AT2G16060	hemoglobin 1
Potri.010G242600	514.053	64.4613	-2.99541	2.54326e-92	7.43609e-90	yes	Chr10:21947752-21951241	-	Chr10:21947752-21951241	-	09100 Metabolism	09104 Nucleotide metabolism|09110 Biosynthesis of other secondary metabolites	ko00230 Purine metabolism|ko00232 Caffeine metabolism	-	GO:0016491/oxidoreductase activity	GO:0055114/oxidation-reduction process	PF01014	PTHR10395 PTHR10395:SF13	EC:1.7.3.3	AT2G26230	uricase / urate oxidase / nodulin 35, putative
Potri.001G431700	371.759	10.1404	-5.19619	1.60979e-91	4.66196e-89	yes	Chr01:46254417-46256612	+	Chr01:46254417-46256612	+	09100 Metabolism|09150 Organismal Systems|09160 Human Diseases|09180 Brite Hierarchies	09106 Metabolism of other amino acids|09111 Xenobiotics biodegradation and metabolism|09149 Aging|09161 Cancer: overview|09162 Cancer: specific types|09166 Cardiovascular disease|09176 Drug resistance: antineoplastic|09183 Protein families: signaling and cellular processes	ko00480 Glutathione metabolism|ko00980 Metabolism of xenobiotics by cytochrome P450|ko00982 Drug metabolism - cytochrome P450|ko00983 Drug metabolism - other enzymes|ko04212 Longevity regulating pathway - worm|ko05200 Pathways in cancer|ko05204 Chemical carcinogenesis|ko05225 Hepatocellular carcinoma|ko05418 Fluid shear stress and atherosclerosis|ko01524 Platinum drug resistance|ko02000 Transport…	-	GO:0005515/protein binding	-	PF13410 PF13417	PTHR11260 PTHR11260:SF230	EC:2.5.1.18	AT1G78340	glutathione S-transferase TAU 22
Potri.010G012100	800.394	204.519	-1.96847	3.00039e-91	8.60715e-89	yes	Chr10:2234294-2235452	-	Chr10:2234294-2235452	-	-	-	-	-	-	GO:0006950/response to stress	PF03242|PF03242	PTHR33509 PTHR33509:SF6|PTHR33509 PTHR33509:SF6		AT4G15910|AT4G15910	drought-induced 21|drought-induced 21
Potri.003G089300	32.7449	450.235	3.78134	1.04766e-88	2.9773e-86	yes	Chr03:11584798-11586294	-	Chr03:11584798-11586294	-	09100 Metabolism	09101 Carbohydrate metabolism|09105 Amino acid metabolism	ko00630 Glyoxylate and dicarboxylate metabolism|ko00260 Glycine, serine and threonine metabolism	GO:0005960/glycine cleavage complex	-	GO:0006546/glycine catabolic process	PF01597	PTHR11715 PTHR11715:SF1		AT2G35370	glycine decarboxylase complex H
Potri.003G072800	162.636	770.625	2.24438	2.66065e-88	7.4912e-86	yes	Chr03:10064083-10068325	-	Chr03:10064083-10068325	-	09100 Metabolism|09130 Environmental Information Processing	09101 Carbohydrate metabolism|09132 Signal transduction	ko00040 Pentose and glucuronate interconversions|ko02020 Two-component system	GO:0005618/cell wall	GO:0004857/enzyme inhibitor activity|GO:0030599/pectinesterase activity	GO:0042545/cell wall modification	PF01095 PF04043	PTHR31707 PTHR31707:SF40	EC:3.1.1.11	AT1G53830	pectin methylesterase 2
Potri.010G236500	870.791	2000.52	1.19998	6.81595e-88	1.90146e-85	yes	Chr10:21661458-21663084	-	Chr10:21661458-21663084	-	09150 Organismal Systems	09154 Digestive system	ko04978 Mineral absorption	-	GO:0046872/metal ion binding	GO:0030001/metal ion transport	PF00403	PTHR22814 PTHR22814:SF73		AT1G66240	homolog of anti-oxidant 1
Potri.001G348900	0	532.723	10.0572	8.07726e-87	2.23285e-84	yes	Chr01:36079320-36083189	-	Chr01:36079320-36083189	-	09100 Metabolism	09102 Energy metabolism	ko00910 Nitrogen metabolism	-	GO:0004089/carbonate dehydratase activity|GO:0008270/zinc ion binding	GO:0015976/carbon utilization	PF00484|PF00484|PF00484|PF00484|PF00484|PF00484|PF00484	PTHR11002 PTHR11002:SF7|PTHR11002 PTHR11002:SF7|PTHR11002 PTHR11002:SF7|PTHR11002 PTHR11002:SF7|PTHR11002 PTHR11002:SF7|PTHR11002 PTHR11002:SF7|PTHR11002 PTHR11002:SF7	EC:4.2.1.1|EC:4.2.1.1|EC:4.2.1.1|EC:4.2.1.1|EC:4.2.1.1|EC:4.2.1.1|EC:4.2.1.1	AT3G01500|AT3G01500|AT3G01500|AT3G01500|AT3G01500|AT3G01500|AT3G01500	carbonic anhydrase 1|carbonic anhydrase 1|carbonic anhydrase 1|carbonic anhydrase 1|carbonic anhydrase 1|carbonic anhydrase 1|carbonic anhydrase 1
Potri.004G020100	47.215	481.6	3.35052	4.82691e-86	1.32231e-83	yes	Chr04:1449415-1450492	-	Chr04:1449415-1450492	-	-	-	-	-	-	GO:0009607/response to biotic stimulus|GO:0006952/defense response	PF00407	PTHR31338 PTHR31338:SF16
Potri.017G098800	434.161	0	-8.93333	1.81259e-85	4.92117e-83	yes	Chr17:11057667-11058423	+	Chr17:11057667-11058423	+	-	-	-	-	-	-	PF06522	PTHR33417 PTHR33417:SF1		AT3G29970	B12D protein
Potri.017G153400	354.694	3.26639	-6.76274	2.00617e-85	5.39855e-83	yes	Chr17:15094365-15095264	-	Chr17:15094365-15095264	-	-	-	-	-	GO:0004866/endopeptidase inhibitor activity	-	PF00197	PTHR33107 PTHR33107:SF2		AT1G17860	Kunitz family trypsin and protease inhibitor protein
Potri.001G249600	26.2083	412.736	3.97712	2.43609e-84	6.49794e-82	yes	Chr01:26554248-26554866	-	Chr01:26554248-26554866	-	-	-	-	-	-	-	PF11493	PTHR36370		AT3G47070	(1 of 1) PF11493 - Thylakoid soluble phosphoprotein TSP9 (TSP9)
Potri.009G072900	587.357	111.821	-2.39305	2.69584e-84	7.12827e-82	yes	Chr09:7122173-7126494	-	Chr09:7122173-7126494	-	09100 Metabolism|09180 Brite Hierarchies	09105 Amino acid metabolism|09181 Protein families: metabolism	ko00250 Alanine, aspartate and glutamate metabolism|ko01002 Peptidases and inhibitors	-	GO:0004066/asparagine synthase (glutamine-hydrolyzing) activity	GO:0006529/asparagine biosynthetic process	PF00733 PF12481	PTHR11772 PTHR11772:SF13	EC:6.3.5.4	AT3G47340	glutamine-dependent asparagine synthase 1
Potri.001G346100	60.3707	509.177	3.07625	5.44709e-84	1.42789e-81	yes	Chr01:35781157-35782190	-	Chr01:35781157-35782190	-	09120 Genetic Information Processing|09180 Brite Hierarchies	09122 Translation|09182 Protein families: genetic information processing	ko03010 Ribosome|ko03011 Ribosome	GO:0005840/ribosome|GO:0005622/intracellular	GO:0003735/structural constituent of ribosome	GO:0006412/translation	PF00542 PF16320			AT3G27840	ribosomal protein L12-B
Potri.004G014850	50.4173	474.685	3.23498	3.1926e-82	8.29748e-80	yes	Chr04:1023331-1025134	-	Chr04:1023331-1025134	-	09100 Metabolism|09180 Brite Hierarchies	09102 Energy metabolism|09181 Protein families: metabolism	ko00190 Oxidative phosphorylation|ko00195 Photosynthesis|ko00194 Photosynthesis proteins	-	-	-	PF00231	PTHR11693 PTHR11693:SF21	EC:3.6.3.14	AT4G04640	ATPase, F1 complex, gamma subunit protein
Potri.018G027600	18.5008	378.066	4.35298	1.30242e-81	3.35626e-79	yes	Chr18:2055350-2056248	+	Chr18:2055350-2056248	+	09100 Metabolism|09180 Brite Hierarchies	09102 Energy metabolism|09181 Protein families: metabolism	ko00195 Photosynthesis|ko00194 Photosynthesis proteins	GO:0016020/membrane|GO:0009522/photosystem I	-	GO:0015979/photosynthesis	PF01241	PTHR34195 PTHR34195:SF2		AT1G30380	photosystem I subunit K
Potri.004G032900	383.357	1.17843	-8.34567	5.9351e-81	1.51659e-78	yes	Chr04:2540564-2541375	+	Chr04:2540564-2541375	+	-	-	-	-	-	GO:0009607/response to biotic stimulus|GO:0006952/defense response	PF00407	PTHR31213 PTHR31213:SF10
Potri.014G093900	62.6672	500.891	2.99872	1.31149e-80	3.32333e-78	yes	Chr14:6093444-6095940	-	Chr14:6093444-6095940	-	-	-	-	-	-	-	PF14159	PTHR33222 PTHR33222:SF4		AT4G01150	(1 of 1) PTHR33222:SF4 - PROTEIN CURVATURE THYLAKOID 1A, CHLOROPLASTIC
Potri.006G254200	157.646	721.765	2.19484	1.73191e-80	4.35238e-78	yes	Chr06:25204010-25205029	-	Chr06:25204010-25205029	-	09100 Metabolism|09180 Brite Hierarchies	09102 Energy metabolism|09181 Protein families: metabolism	ko00195 Photosynthesis|ko00194 Photosynthesis proteins	GO:0016020/membrane|GO:0009522/photosystem I	-	GO:0015979/photosynthesis	PF01241	PTHR34195 PTHR34195:SF2		AT1G30380	photosystem I subunit K
Potri.002G054900	420.395	46.424	-3.1788	8.52265e-80	2.12424e-77	yes	Chr02:3722632-3724391	-	Chr02:3722632-3724391	-	-	-	-	-	GO:0004190/aspartic-type endopeptidase activity	GO:0006508/proteolysis	PF14541 PF14543	PTHR13683 PTHR13683:SF379	EC:3.4.23.12	AT1G03230	Eukaryotic aspartyl protease family protein
Potri.004G051500	5.13626	338.715	6.04321	2.25174e-79	5.56675e-77	yes	Chr04:4146159-4147158	+	Chr04:4146159-4147158	+	-	-	-	-	-	GO:0009607/response to biotic stimulus|GO:0006952/defense response	PF00407	PTHR31338 PTHR31338:SF16
Potri.009G095800	535.284	97.1928	-2.46138	2.49592e-79	6.12063e-77	yes	Chr09:8659801-8662760	+	Chr09:8659801-8662760	+	09100 Metabolism	09110 Biosynthesis of other secondary metabolites	ko00940 Phenylpropanoid biosynthesis	-	GO:0008270/zinc ion binding|GO:0016491/oxidoreductase activity	GO:0055114/oxidation-reduction process	PF00107 PF08240	PTHR11695 PTHR11695:SF574	EC:1.1.1.195	AT3G19450	GroES-like zinc-binding alcohol dehydrogenase family protein
Potri.003G020400	14.2227	349.215	4.61785	1.15219e-77	2.80285e-75	yes	Chr03:2144665-2146212	+	Chr03:2144665-2146212	+	09100 Metabolism|09180 Brite Hierarchies	09102 Energy metabolism|09181 Protein families: metabolism	ko00196 Photosynthesis - antenna proteins|ko00194 Photosynthesis proteins	GO:0016020/membrane	-	GO:0009765/photosynthesis, light harvesting	PF00504|PF00504	PTHR21649 PTHR21649:SF28|PTHR21649 PTHR21649:SF28		AT1G15820|AT1G15820	light harvesting complex photosystem II subunit 6|light harvesting complex photosystem II subunit 6
Potri.003G061200	512.641	90.6909	-2.49892	2.87949e-77	6.94918e-75	yes	Chr03:8762294-8762863	+	Chr03:8762294-8762863	+	-	-	-	-	-	-		PTHR36328		AT1G51920	(1 of 5) PTHR36328:SF1 - CRYPTDIN PROTEIN-LIKE PROTEIN
Potri.008G181900	59.3748	476.859	3.00564	5.24404e-77	1.2556e-74	yes	Chr08:12537004-12538215	-	Chr08:12537004-12538215	-	09100 Metabolism|09180 Brite Hierarchies	09102 Energy metabolism|09181 Protein families: metabolism	ko00195 Photosynthesis|ko00194 Photosynthesis proteins	GO:0016021/integral component of membrane|GO:0009523/photosystem II	GO:0030145/manganese ion binding	GO:0015979/photosynthesis	PF06298	PTHR34790		AT1G67740	photosystem II BY
Potri.014G022900	320.514	13.0988	-4.61289	9.70271e-77	2.305e-74	yes	Chr14:1382701-1384676	-	Chr14:1382701-1384676	-	09100 Metabolism|09180 Brite Hierarchies	09105 Amino acid metabolism|09106 Metabolism of other amino acids|09181 Protein families: metabolism	ko00250 Alanine, aspartate and glutamate metabolism|ko00460 Cyanoamino acid metabolism|ko01002 Peptidases and inhibitors	-	GO:0016787/hydrolase activity	-	PF01112	PTHR10188 PTHR10188:SF13	EC:3.5.1.1	AT3G16150	N-terminal nucleophile aminohydrolases (Ntn hydrolases) superfamily protein
Potri.004G086600	2.85143	335.315	6.87769	1.50829e-76	3.55536e-74	yes	Chr04:7268752-7269653	+	Chr04:7268752-7269653	+	-	-	-	-	-	-	PF00234	PTHR33076 PTHR33076:SF11		AT2G15050	lipid transfer protein
Potri.005G205000	49.9159	448.519	3.1676	2.68311e-76	6.276e-74	yes	Chr05:21006071-21006457	-	Chr05:21006071-21006457	-	-	-	-	-	-	-
Potri.007G008500	5.69915	320.865	5.81507	2.31413e-75	5.37161e-73	yes	Chr07:653839-655548	-	Chr07:653839-655548	-	09190 Not Included in Pathway or Brite	09191 Unclassified: metabolism	ko99980 Enzymes with EC numbers	GO:0048046/apoplast|GO:0005618/cell wall	GO:0016762/xyloglucan:xyloglucosyl transferase activity|GO:0004553/hydrolase activity, hydrolyzing O-glycosyl compounds	GO:0006073/cellular glucan metabolic process|GO:0005975/carbohydrate metabolic process	PF00722 PF06955	PTHR31062 PTHR31062:SF48	EC:2.4.1.207 EC:3.2.1.151	AT5G65730	xyloglucan endotransglucosylase/hydrolase 6
Potri.013G041600	1518.38	728.639	-1.05926	4.09577e-74	9.43516e-72	yes	Chr13:2869657-2870824	+	Chr13:2869657-2870824	+	-	-	-	-	GO:0008061/chitin binding	-	PF00187 PF00967	PTHR22595 PTHR22595:SF1		AT3G04720	pathogenesis-related 4
Potri.018G065200	48.0418	433.576	3.17392	5.9063e-74	1.35037e-71	yes	Chr18:7800936-7801656	+	Chr18:7800936-7801656	+	-	-	-	GO:0016020/membrane|GO:0009523/photosystem II	-	GO:0015979/photosynthesis	PF06596	PTHR34455 PTHR34455:SF1		AT2G06520	photosystem II subunit X
Potri.019G070975	34.2928	392.868	3.51807	1.76903e-73	4.01438e-71	yes	Chr19:11250807-11254315	-	Chr19:11250807-11254315	-	-	-	-	-	-	-	PF03007 PF06974	PTHR31650 PTHR31650:SF2	EC:2.3.1.20 EC:2.3.1.75
Potri.009G169900	368.338	36.3831	-3.33969	5.7889e-73	1.30392e-70	yes	Chr09:12907145-12909649	+	Chr09:12907145-12909649	+	09100 Metabolism|09130 Environmental Information Processing|09150 Organismal Systems	09109 Metabolism of terpenoids and polyketides|09132 Signal transduction|09154 Digestive system	ko00900 Terpenoid backbone biosynthesis|ko04152 AMPK signaling pathway|ko04976 Bile secretion	-	GO:0004420/hydroxymethylglutaryl-CoA reductase (NADPH) activity|GO:0050662/coenzyme binding	GO:0055114/oxidation-reduction process|GO:0015936/coenzyme A metabolic process	PF00368	PTHR10572 PTHR10572:SF9	EC:1.1.1.34
Potri.017G153600	353.325	0	-8.57551	6.7489e-73	1.50897e-70	yes	Chr17:15087941-15088810	-	Chr17:15087941-15088810	-	-	-	-	-	GO:0004866/endopeptidase inhibitor activity	-	PF00197	PTHR33107 PTHR33107:SF2		AT1G17860	Kunitz family trypsin and protease inhibitor protein
Potri.001G210000	64.6945	470.43	2.86227	2.61144e-72	5.79625e-70	yes	Chr01:21487239-21488635	-	Chr01:21487239-21488635	-	09100 Metabolism|09180 Brite Hierarchies	09102 Energy metabolism|09181 Protein families: metabolism	ko00196 Photosynthesis - antenna proteins|ko00194 Photosynthesis proteins	GO:0016020/membrane	-	GO:0009765/photosynthesis, light harvesting	PF00504	PTHR21649 PTHR21649:SF28		AT1G15820	light harvesting complex photosystem II subunit 6
Potri.014G140500	31.368	378.31	3.5922	5.21279e-72	1.14863e-69	yes	Chr14:9533179-9536098	-	Chr14:9533179-9536098	-	09100 Metabolism	09102 Energy metabolism	ko00710 Carbon fixation in photosynthetic organisms	-	GO:0016620/oxidoreductase activity, acting on the aldehyde or oxo group of donors, NAD or NADP as acceptor	GO:0055114/oxidation-reduction process	PF00044 PF02800	PTHR10836 PTHR10836:SF49	EC:1.2.1.12 EC:1.2.1.13	AT1G12900	glyceraldehyde 3-phosphate dehydrogenase A subunit 2
Potri.009G052500	10.253	312.999	4.93203	1.55962e-71	3.41186e-69	yes	Chr09:5716611-5716928	+	Chr09:5716611-5716928	+	-	-	-	-	-	-		PTHR34940 PTHR34940:SF1		AT3G21055	photosystem II subunit T
Potri.012G085901	69.8341	477.7	2.7741	5.20777e-71	1.13113e-68	yes	Chr12:11154540-11155063	+	Chr12:11154540-11155063	+	-	-	-	-	-	-		PTHR38224
Potri.009G112553	311.892	19.2962	-4.01466	3.8868e-70	8.38226e-68	yes	Chr09:9593228-9593917	+	Chr09:9593228-9593917	+	-	-	-	-	-	-	PF14368	PTHR33122 PTHR33122:SF9
Potri.010G075200	357.021	36.7316	-3.28092	8.36075e-70	1.79038e-67	yes	Chr10:10319912-10320425	-	Chr10:10319912-10320425	-	-	-	-	-	GO:0004867/serine-type endopeptidase inhibitor activity	GO:0009611/response to wounding	PF00280	PTHR33091 PTHR33091:SF14		AT2G38870	Serine protease inhibitor, potato inhibitor I-type family protein
Potri.011G033100	1057.45	429.501	-1.29985	1.27062e-69	2.70189e-67	yes	Chr11:2666629-2669951	-	Chr11:2666629-2669951	-	09100 Metabolism	09108 Metabolism of cofactors and vitamins	ko00130 Ubiquinone and other terpenoid-quinone biosynthesis	-	GO:0009055/electron transfer activity|GO:0016491/oxidoreductase activity|GO:0010181/FMN binding	-	PF03358	PTHR30546	EC:1.6.5.2
Potri.007G057200	19.7768	333.695	4.07665	1.27366e-69	2.68955e-67	yes	Chr07:5986441-5989258	-	Chr07:5986441-5989258	-	09100 Metabolism|09180 Brite Hierarchies	09102 Energy metabolism|09181 Protein families: metabolism	ko00195 Photosynthesis|ko00194 Photosynthesis proteins	-	GO:0016491/oxidoreductase activity	GO:0055114/oxidation-reduction process	PF00175	PTHR19384 PTHR19384:SF82	EC:1.18.1.2 EC:1.6.99.1	AT5G66190	ferredoxin-NADP(+)-oxidoreductase 1
Potri.006G047300	320.675	23.2975	-3.78286	1.41974e-69	2.97735e-67	yes	Chr06:3231320-3233373	+	Chr06:3231320-3233373	+	09150 Organismal Systems	09159 Environmental adaptation	ko04626 Plant-pathogen interaction	-	-	-	PF13202 PF13405	PTHR10183		AT3G10300	Calcium-binding EF-hand family protein
Potri.001G019890	292.887	13.9877	-4.38812	6.39126e-69	1.32208e-66	yes	Chr01:1488789-1490523	+	Chr01:1488789-1490523	+	-	-	-	-	-	-
Potri.002G072100	569.099	137.289	-2.05146	1.06278e-68	2.18359e-66	yes	Chr02:5057563-5062156	-	Chr02:5057563-5062156	-	09100 Metabolism	09101 Carbohydrate metabolism|09103 Lipid metabolism|09105 Amino acid metabolism	ko00010 Glycolysis / Gluconeogenesis|ko00071 Fatty acid degradation|ko00592 alpha-Linolenic acid metabolism|ko00350 Tyrosine metabolism	-	GO:0008270/zinc ion binding|GO:0016491/oxidoreductase activity	GO:0055114/oxidation-reduction process	PF00107 PF08240	PTHR11695 PTHR11695:SF493	EC:1.1.1.1	AT1G77120	alcohol dehydrogenase 1
Potri.004G003000	16.8716	320.933	4.2496	1.13428e-68	2.31484e-66	yes	Chr04:186272-188594	-	Chr04:186272-188594	-	09100 Metabolism	09105 Amino acid metabolism	ko00270 Cysteine and methionine metabolism	-	GO:0016706/oxidoreductase activity, acting on paired donors, with incorporation or reduction of molecular oxygen, 2-oxoglutarate as one donor, and incorporation of one atom each of oxygen into both donors|GO:0016491/oxidoreductase activity	GO:0055114/oxidation-reduction process	PF03171 PF14226|PF03171 PF14226	PTHR10209 PTHR10209:SF173|PTHR10209 PTHR10209:SF173	EC:1.14.17.4|EC:1.14.17.4	AT1G05010|AT1G05010	ethylene-forming enzyme|ethylene-forming enzyme
Potri.005G013600	430.996	0	-10.5011	2.76336e-68	5.60187e-66	yes	Chr05:1086450-1088502	+	Chr05:1086450-1088502	+	-	-	-	-	GO:0016706/oxidoreductase activity, acting on paired donors, with incorporation or reduction of molecular oxygen, 2-oxoglutarate as one donor, and incorporation of one atom each of oxygen into both donors|GO:0016491/oxidoreductase activity	GO:0055114/oxidation-reduction process	PF03171 PF14226	PTHR10209 PTHR10209:SF124	EC:1.14.11.11 EC:1.14.11.14
Potri.012G085800	153.864	652.433	2.08417	3.62104e-68	7.29196e-66	yes	Chr12:11142697-11143337	+	Chr12:11142697-11143337	+	-	-	-	-	-	-		PTHR38224
Potri.001G389400	272.164	6.73186	-5.33733	9.35479e-68	1.87145e-65	yes	Chr01:41210666-41212632	-	Chr01:41210666-41212632	-	-	-	-	-	-	-		PTHR31723		AT1G78780	pathogenesis-related family protein
Potri.002G083500	42.5133	389.758	3.19659	4.15933e-67	8.26646e-65	yes	Chr02:5940490-5942959	+	Chr02:5940490-5942959	+	09100 Metabolism|09180 Brite Hierarchies	09102 Energy metabolism|09181 Protein families: metabolism	ko00195 Photosynthesis|ko00194 Photosynthesis proteins	-	-	-	PF00504|PF00504	PTHR14154 PTHR14154:SF10|PTHR14154 PTHR14154:SF10		AT1G44575|AT1G44575	Chlorophyll A-B binding family protein|Chlorophyll A-B binding family protein
Potri.010G072200	325.226	964.713	1.56866	1.92466e-66	3.80034e-64	yes	Chr10:10048013-10049030	+	Chr10:10048013-10049030	+	-	-	-	-	-	-	PF02095	PTHR34629
Potri.005G144000	329.474	31.9449	-3.36651	7.31615e-66	1.43529e-63	yes	Chr05:11606264-11608595	+	Chr05:11606264-11608595	+	-	-	-	-	GO:0020037/heme binding|GO:0009055/electron transfer activity|GO:0016705/oxidoreductase activity, acting on paired donors, with incorporation or reduction of molecular oxygen	GO:0055114/oxidation-reduction process	PF00067	PTHR24298 PTHR24298:SF116	EC:1.14.13.89	AT1G66540	Cytochrome P450 superfamily protein
Potri.004G147300	11.2055	291.448	4.70095	1.3293e-65	2.59111e-63	yes	Chr04:16948401-16949298	+	Chr04:16948401-16949298	+	-	-	-	-	-	-	PF08041|PF08041	PTHR34951|PTHR34951		AT2G26500|AT2G26500	cytochrome b6f complex subunit (petM), putative|cytochrome b6f complex subunit (petM), putative
Potri.009G022300	662.903	197.179	-1.74929	1.34435e-65	2.60376e-63	yes	Chr09:3441893-3444462	+	Chr09:3441893-3444462	+	-	-	-	-	GO:0004869/cysteine-type endopeptidase inhibitor activity	-	PF00031	PTHR11413 PTHR11413:SF50		AT2G40880	cystatin A
Potri.008G084500	51.9817	403.136	2.95519	2.71643e-64	5.22792e-62	yes	Chr08:5278511-5282170	-	Chr08:5278511-5282170	-	09100 Metabolism|09130 Environmental Information Processing|09180 Brite Hierarchies	09101 Carbohydrate metabolism|09102 Energy metabolism|09132 Signal transduction|09183 Protein families: signaling and cellular processes	ko00010 Glycolysis / Gluconeogenesis|ko00710 Carbon fixation in photosynthetic organisms|ko04066 HIF-1 signaling pathway|ko04147 Exosome	-	GO:0004618/phosphoglycerate kinase activity	GO:0006096/glycolytic process	PF00162	PTHR11406 PTHR11406:SF8	EC:2.7.2.3	AT1G56190	Phosphoglycerate kinase family protein
Potri.011G006800	25.2765	328.842	3.70153	2.76868e-64	5.29497e-62	yes	Chr11:545382-548382	+	Chr11:545382-548382	+	09100 Metabolism	09101 Carbohydrate metabolism|09105 Amino acid metabolism|09108 Metabolism of cofactors and vitamins	ko00630 Glyoxylate and dicarboxylate metabolism|ko00260 Glycine, serine and threonine metabolism|ko00670 One carbon pool by folate	GO:0005737/cytoplasm	-	GO:0006546/glycine catabolic process	PF01571 PF08669|PF01571 PF08669|PF01571 PF08669|PF01571 PF08669	PTHR13847 PTHR13847:SF5|PTHR13847 PTHR13847:SF5|PTHR13847 PTHR13847:SF5|PTHR13847 PTHR13847:SF5	EC:2.1.2.10|EC:2.1.2.10|EC:2.1.2.10|EC:2.1.2.10	AT1G11860|AT1G11860|AT1G11860|AT1G11860	Glycine cleavage T-protein family|Glycine cleavage T-protein family|Glycine cleavage T-protein family|Glycine cleavage T-protein family
Potri.006G229300	30.2618	341.77	3.49745	7.40985e-64	1.40824e-61	yes	Chr06:23311818-23319218	+	Chr06:23311818-23319218	+	09100 Metabolism	09101 Carbohydrate metabolism|09105 Amino acid metabolism	ko00630 Glyoxylate and dicarboxylate metabolism|ko00260 Glycine, serine and threonine metabolism	-	GO:0016829/lyase activity	GO:0055114/oxidation-reduction process|GO:0006520/cellular amino acid metabolic process	PF02347	PTHR11773 PTHR11773:SF4	EC:1.4.4.2	AT2G26080	glycine decarboxylase P-protein 2
Potri.007G111500	281.58	18.0705	-3.96184	4.96072e-63	9.36929e-61	yes	Chr07:13311486-13312444	-	Chr07:13311486-13312444	-	-	-	-	-	GO:0004866/endopeptidase inhibitor activity	-	PF00197	PTHR33107 PTHR33107:SF4
Potri.015G047100	751.308	258.293	-1.5404	7.53262e-63	1.4139e-60	yes	Chr15:4693072-4695259	+	Chr15:4693072-4695259	+	-	-	-	-	-	-		PTHR33384 PTHR33384:SF4|PTHR33384 PTHR33384:SF4		AT5G16110|AT5G16110
Potri.019G118500	32.8246	341.466	3.37889	5.42271e-62	1.01162e-59	yes	Chr19:14453220-14455772	-	Chr19:14453220-14455772	-	09100 Metabolism|09180 Brite Hierarchies	09102 Energy metabolism|09181 Protein families: metabolism	ko00195 Photosynthesis|ko00194 Photosynthesis proteins	GO:0042651/thylakoid membrane	GO:0051537/2 iron, 2 sulfur cluster binding	GO:0055114/oxidation-reduction process	PF00355 PF08802	PTHR10134 PTHR10134:SF5	EC:1.10.9.1	AT4G03280	photosynthetic electron transfer C
Potri.T125404	357.62	49.723	-2.84644	7.14511e-62	1.32481e-59	yes	scaffold_502:87632-88287	+	scaffold_502:87632-88287	+	-	-	-	-	-	-	PF14368	PTHR33122 PTHR33122:SF9
Potri.001G121900	245.937	5.8211	-5.40086	1.767e-61	3.25642e-59	yes	Chr01:10000752-10001874	+	Chr01:10000752-10001874	+	-	-	-	-	-	-	PF14547	PTHR31731 PTHR31731:SF26		AT1G62510	Bifunctional inhibitor/lipid-transfer protein/seed storage 2S albumin superfamily protein
Potri.006G250100	2.41142	266.011	6.78546	2.20215e-61	4.03391e-59	yes	Chr06:24951521-24954946	+	Chr06:24951521-24954946	+	-	-	-	-	-	-	PF04862|PF04862	PTHR31265 PTHR31265:SF3|PTHR31265 PTHR31265:SF3		AT4G32460|AT4G32460	Protein of unknown function, DUF642|Protein of unknown function, DUF642
Potri.001G463400	241.662	4.4083	-5.77663	1.41726e-60	2.58061e-58	yes	Chr01:48944223-48946158	+	Chr01:48944223-48946158	+	-	-	-	-	GO:0008762/UDP-N-acetylmuramate dehydrogenase activity|GO:0016491/oxidoreductase activity|GO:0050660/flavin adenine dinucleotide binding	GO:0055114/oxidation-reduction process	PF01565 PF08031	PTHR32448 PTHR32448:SF11	EC:1.3.3.8	AT1G30760	FAD-binding Berberine family protein
Potri.003G167400	251.067	10.2617	-4.61273	1.64234e-60	2.97263e-58	yes	Chr03:17653512-17654015	+	Chr03:17653512-17654015	+	09130 Environmental Information Processing	09132 Signal transduction	ko04075 Plant hormone signal transduction	-	-	-	PF02519	PTHR31374 PTHR31374:SF10		AT5G50760	SAUR-like auxin-responsive protein family
Potri.018G114801	866.873	340.537	-1.34801	2.43155e-60	4.37507e-58	yes	Chr18:13133204-13133723	+	Chr18:13133204-13133723	+	-	-	-	-	-	-
Potri.008G067300	24.7364	311.13	3.65281	2.56133e-60	4.58147e-58	yes	Chr08:4059190-4061753	-	Chr08:4059190-4061753	-	09100 Metabolism|09180 Brite Hierarchies	09102 Energy metabolism|09181 Protein families: metabolism	ko00196 Photosynthesis - antenna proteins|ko00194 Photosynthesis proteins	GO:0016020/membrane	-	GO:0009765/photosynthesis, light harvesting	PF00504	PTHR21649 PTHR21649:SF32		AT2G40100	light harvesting complex photosystem II
Potri.010G066900	27.5752	317.847	3.52689	6.42946e-60	1.14332e-57	yes	Chr10:9499226-9499822	-	Chr10:9499226-9499822	-	-	-	-	-	-	-		PTHR35709		AT2G05620	proton gradient regulation 5
Potri.006G124800	531.223	139.001	-1.93423	6.6976e-60	1.18407e-57	yes	Chr06:9945616-9947511	+	Chr06:9945616-9947511	+	-	-	-	-	GO:0046872/metal ion binding	GO:0030001/metal ion transport	PF00403	PTHR22814 PTHR22814:SF113		AT2G36950	Heavy metal transport/detoxification superfamily protein
Potri.013G080300	0	328.05	9.35777	1.66558e-59	2.91075e-57	yes	Chr13:6929100-6930856	-	Chr13:6929100-6930856	-	-	-	-	-	GO:0003824/catalytic activity	GO:0009116/nucleoside metabolic process	PF01048	PTHR21234 PTHR21234:SF20	EC:3.2.2.9
Potri.011G158100	247.451	1.79199	-7.10943	6.36003e-59	1.10512e-56	yes	Chr11:18384809-18386641	+	Chr11:18384809-18386641	+	-	-	-	-	GO:0008762/UDP-N-acetylmuramate dehydrogenase activity|GO:0016491/oxidoreductase activity|GO:0050660/flavin adenine dinucleotide binding	GO:0055114/oxidation-reduction process	PF01565 PF08031	PTHR32448	EC:1.3.3.8	AT5G44410	FAD-binding Berberine family protein
Potri.009G114600	409.808	79.9314	-2.35811	1.93646e-58	3.34568e-56	yes	Chr09:9705507-9706997	-	Chr09:9705507-9706997	-	-	-	-	-	-	-	PF03181	PTHR31236 PTHR31236:SF4		AT1G49320	unknown seed protein like 1
Potri.012G043200	70.9982	419.667	2.56339	2.29983e-57	3.95104e-55	yes	Chr12:3870834-3872110	+	Chr12:3870834-3872110	+	09130 Environmental Information Processing|09180 Brite Hierarchies	09132 Signal transduction|09181 Protein families: metabolism	ko04016 MAPK signaling pathway - plant|ko01001 Protein kinases	-	GO:0005524/ATP binding|GO:0004672/protein kinase activity	GO:0006468/protein phosphorylation	PF14531	PTHR24361 PTHR24361:SF344	EC:2.7.12.2	AT1G18350	MAP kinase kinase 7
Potri.005G112900	30.7983	316.446	3.36104	2.53638e-57	4.33294e-55	yes	Chr05:8177290-8180191	-	Chr05:8177290-8180191	-	09100 Metabolism|09180 Brite Hierarchies	09102 Energy metabolism|09181 Protein families: metabolism	ko00195 Photosynthesis|ko00194 Photosynthesis proteins	-	GO:0016491/oxidoreductase activity	GO:0055114/oxidation-reduction process	PF00175	PTHR19384 PTHR19384:SF82	EC:1.18.1.2 EC:1.6.99.1	AT5G66190	ferredoxin-NADP(+)-oxidoreductase 1
Potri.004G033000	261.22	0	-8.0856	2.98669e-57	5.0737e-55	yes	Chr04:2545561-2546555	+	Chr04:2545561-2546555	+	-	-	-	-	-	GO:0009607/response to biotic stimulus|GO:0006952/defense response	PF00407	PTHR31213 PTHR31213:SF10
Potri.011G118900	11.3942	258.113	4.50163	3.1102e-57	5.25416e-55	yes	Chr11:15003494-15004145	+	Chr11:15003494-15004145	+	-	-	-	-	-	-		PTHR33357		AT3G15353	metallothionein 3
Potri.001G379000	167.801	618.103	1.8811	2.95991e-56	4.97264e-54	yes	Chr01:39965513-39966729	-	Chr01:39965513-39966729	-	-	-	-	-	-	-	PF04832	PTHR11220 PTHR11220:SF25		AT1G17100	SOUL heme-binding family protein
Potri.017G051100	5.86585	238.398	5.34489	5.15502e-56	8.61284e-54	yes	Chr17:3648263-3649463	+	Chr17:3648263-3649463	+	-	-	-	-	-	GO:0009607/response to biotic stimulus|GO:0006952/defense response	PF00407	PTHR31907 PTHR31907:SF4
Potri.016G101900	301.022	35.9156	-3.06719	5.844e-56	9.71061e-54	yes	Chr16:10355958-10356257	+	Chr16:10355958-10356257	+	-	-	-	-	-	-		PTHR34670 PTHR34670:SF3		AT2G37750	(1 of 2) PTHR34670:SF3 - EXPRESSED PROTEIN
Potri.013G081233	0	300.35	9.2305	1.64393e-55	2.70208e-53	yes	Chr13:6975404-6977178	-	Chr13:6975404-6977178	-	-	-	-	-	-	-	PF01048	PTHR21234 PTHR21234:SF20	EC:3.2.2.9
Potri.010G075600	222.876	6.42434	-5.11655	1.84884e-55	3.02256e-53	yes	Chr10:10340610-10341410	-	Chr10:10340610-10341410	-	-	-	-	-	GO:0004867/serine-type endopeptidase inhibitor activity	GO:0009611/response to wounding	PF00280	PTHR33091 PTHR33091:SF14		AT2G38870	Serine protease inhibitor, potato inhibitor I-type family protein
Potri.014G165100	31.0422	309.121	3.31587	2.19866e-55	3.57523e-53	yes	Chr14:11957381-11959576	-	Chr14:11957381-11959576	-	09100 Metabolism|09180 Brite Hierarchies	09102 Energy metabolism|09181 Protein families: metabolism	ko00196 Photosynthesis - antenna proteins|ko00194 Photosynthesis proteins	GO:0016020/membrane	-	GO:0009765/photosynthesis, light harvesting	PF00504	PTHR21649 PTHR21649:SF8		AT3G27690	photosystem II light harvesting complex gene 2.3
Potri.008G002900	31.8662	310.058	3.28244	4.7085e-55	7.61575e-53	yes	Chr08:90547-97154	+	Chr08:90547-97154	+	09100 Metabolism|09160 Human Diseases	09101 Carbohydrate metabolism|09102 Energy metabolism|09105 Amino acid metabolism|09106 Metabolism of other amino acids|09108 Metabolism of cofactors and vitamins|09176 Drug resistance: antineoplastic	ko00630 Glyoxylate and dicarboxylate metabolism|ko00680 Methane metabolism|ko00260 Glycine, serine and threonine metabolism|ko00460 Cyanoamino acid metabolism|ko00670 One carbon pool by folate|ko01523 Antifolate resistance	-	GO:0004372/glycine hydroxymethyltransferase activity|GO:0016829/lyase activity	GO:0006544/glycine metabolic process|GO:0006563/L-serine metabolic process|GO:0006520/cellular amino acid metabolic process	PF00464|PF00464|PF00464	PTHR11680 PTHR11680:SF8|PTHR11680 PTHR11680:SF8|PTHR11680 PTHR11680:SF8	EC:2.1.2.1|EC:2.1.2.1|EC:2.1.2.1	AT4G37930|AT4G37930|AT4G37930	serine transhydroxymethyltransferase 1|serine transhydroxymethyltransferase 1|serine transhydroxymethyltransferase 1
Potri.006G027300	47.9714	350.187	2.86788	2.11342e-54	3.40025e-52	yes	Chr06:1772545-1775240	-	Chr06:1772545-1775240	-	09100 Metabolism	09108 Metabolism of cofactors and vitamins	ko00860 Porphyrin and chlorophyll metabolism	-	GO:0046872/metal ion binding|GO:0016491/oxidoreductase activity	GO:0055114/oxidation-reduction process	PF02915	PTHR31053 PTHR31053:SF2	EC:1.14.13.81	AT3G56940	dicarboxylate diiron protein, putative (Crd1)
Potri.012G068801	105.981	480.85	2.18178	8.14663e-54	1.29698e-51	yes	Chr12:8987177-8989829	+	Chr12:8987177-8989829	+	09100 Metabolism	09108 Metabolism of cofactors and vitamins|09109 Metabolism of terpenoids and polyketides	ko00860 Porphyrin and chlorophyll metabolism|ko00900 Terpenoid backbone biosynthesis	-	-	-	PF01134	PTHR10617 PTHR10617:SF116	EC:1.3.1.83	AT1G74470	Pyridine nucleotide-disulphide oxidoreductase family protein
Potri.002G146300	18.5903	266.221	3.84	8.84726e-54	1.40118e-51	yes	Chr02:11022927-11027281	+	Chr02:11022927-11027281	+	09100 Metabolism	09101 Carbohydrate metabolism|09102 Energy metabolism|09109 Metabolism of terpenoids and polyketides	ko00030 Pentose phosphate pathway|ko00710 Carbon fixation in photosynthetic organisms|ko01051 Biosynthesis of ansamycins	-	GO:0003824/catalytic activity	GO:0008152/metabolic process	PF00456 PF02779 PF02780	PTHR11624 PTHR11624:SF81	EC:2.2.1.1 EC:2.2.1.2	AT3G60750	Transketolase
Potri.003G065266	0	271.441	8.6991	1.42655e-53	2.24759e-51	yes	Chr03:9267365-9268629	+	Chr03:9267365-9268629	+	-	-	-	-	-	-	PF07883	PTHR31238 PTHR31238:SF21
Potri.004G044700	272.673	28.4386	-3.26125	1.73127e-53	2.71364e-51	yes	Chr04:3537401-3539401	+	Chr04:3537401-3539401	+	-	-	-	-	-	-	PF01190	PTHR31614 PTHR31614:SF15		AT2G33790	arabinogalactan protein 30
Potri.006G136700	286.351	34.3931	-3.05759	3.54082e-53	5.5215e-51	yes	Chr06:11257840-11265268	+	Chr06:11257840-11265268	+	09100 Metabolism|09180 Brite Hierarchies	09101 Carbohydrate metabolism|09181 Protein families: metabolism	ko00500 Starch and sucrose metabolism|ko01003 Glycosyltransferases	-	-	GO:0009058/biosynthetic process|GO:0005985/sucrose metabolic process	PF00534 PF00862|PF00534 PF00862|PF00534 PF00862|PF00534 PF00862|PF00534 PF00862|PF00534 PF00862|PF00534 PF00862	PTHR12526 PTHR12526:SF391|PTHR12526 PTHR12526:SF391|PTHR12526 PTHR12526:SF391|PTHR12526 PTHR12526:SF391|PTHR12526 PTHR12526:SF391|PTHR12526 PTHR12526:SF391|PTHR12526 PTHR12526:SF391	EC:2.4.1.13|EC:2.4.1.13|EC:2.4.1.13|EC:2.4.1.13|EC:2.4.1.13|EC:2.4.1.13|EC:2.4.1.13	AT5G20830|AT5G20830|AT5G20830|AT5G20830|AT5G20830|AT5G20830|AT5G20830	sucrose synthase 1|sucrose synthase 1|sucrose synthase 1|sucrose synthase 1|sucrose synthase 1|sucrose synthase 1|sucrose synthase 1
Potri.004G168800	472.632	1118.7	1.24304	6.17146e-53	9.57459e-51	yes	Chr04:18647587-18648319	+	Chr04:18647587-18648319	+	09190 Not Included in Pathway or Brite	09191 Unclassified: metabolism	ko99980 Enzymes with EC numbers	-	GO:0003755/peptidyl-prolyl cis-trans isomerase activity	GO:0006457/protein folding	PF00160|PF00160	PTHR11071 PTHR11071:SF264|PTHR11071 PTHR11071:SF264	EC:5.2.1.8|EC:5.2.1.8	AT4G38740|AT4G38740	rotamase CYP 1|rotamase CYP 1
Potri.009G111938	944.733	425.389	-1.15113	1.23124e-52	1.90049e-50	yes	Chr09:9552886-9553800	+	Chr09:9552886-9553800	+	-	-	-	-	-	-		PTHR34023|PTHR34023
Potri.019G087300	29.422	292.656	3.31424	1.65661e-52	2.54415e-50	yes	Chr19:12638505-12639752	+	Chr19:12638505-12639752	+	09100 Metabolism|09180 Brite Hierarchies	09102 Energy metabolism|09181 Protein families: metabolism	ko00190 Oxidative phosphorylation|ko00195 Photosynthesis|ko00194 Photosynthesis proteins	GO:0045261/proton-transporting ATP synthase complex, catalytic core F(1)|GO:0005886/plasma membrane	GO:0046933/proton-transporting ATP synthase activity, rotational mechanism	GO:0015986/ATP synthesis coupled proton transport	PF00213	PTHR11910 PTHR11910:SF7	EC:3.6.3.14	AT4G09650	ATP synthase delta-subunit gene
Potri.004G020000	3.40706	220.698	6.0174	2.27245e-52	3.4724e-50	yes	Chr04:1428264-1429354	-	Chr04:1428264-1429354	-	-	-	-	-	-	GO:0009607/response to biotic stimulus|GO:0006952/defense response	PF00407	PTHR31338 PTHR31338:SF16
Potri.008G179300	219.294	10.704	-4.35665	6.72778e-52	1.02289e-49	yes	Chr08:12377693-12380961	-	Chr08:12377693-12380961	-	09100 Metabolism|09130 Environmental Information Processing|09160 Human Diseases|09180 Brite Hierarchies	09101 Carbohydrate metabolism|09102 Energy metabolism|09132 Signal transduction|09164 Neurodegenerative disease|09171 Infectious disease: bacterial|09182 Protein families: genetic information processing|09183 Protein families: signaling and cellular processes	ko00010 Glycolysis / Gluconeogenesis|ko00710 Carbon fixation in photosynthetic organisms|ko04066 HIF-1 signaling pathway|ko05010 Alzheimer disease|ko05130 Pathogenic Escherichia coli infection|ko04131 Membrane trafficking|ko04147 Exosome	-	GO:0016620/oxidoreductase activity, acting on the aldehyde or oxo group of donors, NAD or NADP as acceptor	GO:0055114/oxidation-reduction process	PF00044 PF02800|PF00044 PF02800	PTHR10836 PTHR10836:SF59|PTHR10836 PTHR10836:SF59	EC:1.2.1.12|EC:1.2.1.12	AT1G13440|AT1G13440	glyceraldehyde-3-phosphate dehydrogenase C2|glyceraldehyde-3-phosphate dehydrogenase C2
Potri.016G057600	517.402	153.559	-1.75249	1.0372e-51	1.56912e-49	yes	Chr16:3900106-3901619	-	Chr16:3900106-3901619	-	-	-	-	-	GO:0004553/hydrolase activity, hydrolyzing O-glycosyl compounds	GO:0005975/carbohydrate metabolic process	PF00332|PF00332	PTHR32227 PTHR32227:SF49|PTHR32227 PTHR32227:SF49	EC:3.2.1.39|EC:3.2.1.39	AT3G57270|AT3G57270	beta-1,3-glucanase 1|beta-1,3-glucanase 1
Potri.009G081600	30.8637	293.101	3.24741	1.20594e-51	1.81536e-49	yes	Chr09:7768999-7772319	-	Chr09:7768999-7772319	-	09100 Metabolism	09101 Carbohydrate metabolism|09102 Energy metabolism|09105 Amino acid metabolism	ko00020 Citrate cycle (TCA cycle)|ko00620 Pyruvate metabolism|ko00630 Glyoxylate and dicarboxylate metabolism|ko00710 Carbon fixation in photosynthetic organisms|ko00270 Cysteine and methionine metabolism	-	GO:0030060/L-malate dehydrogenase activity|GO:0016491/oxidoreductase activity	GO:0055114/oxidation-reduction process|GO:0006108/malate metabolic process	PF00056 PF02866	PTHR11540 PTHR11540:SF21	EC:1.1.1.37
Potri.006G151600	257.071	25.4718	-3.33519	2.03046e-51	3.04148e-49	yes	Chr06:13271173-13272586	-	Chr06:13271173-13272586	-	09100 Metabolism	09105 Amino acid metabolism	ko00270 Cysteine and methionine metabolism	-	GO:0016706/oxidoreductase activity, acting on paired donors, with incorporation or reduction of molecular oxygen, 2-oxoglutarate as one donor, and incorporation of one atom each of oxygen into both donors|GO:0016491/oxidoreductase activity	GO:0055114/oxidation-reduction process	PF03171 PF14226	PTHR10209 PTHR10209:SF103	EC:1.14.17.4	AT2G19590	ACC oxidase 1
Potri.016G132700	570.677	186.428	-1.61405	3.47793e-51	5.18416e-49	yes	Chr16:13713752-13715786	+	Chr16:13713752-13715786	+	09100 Metabolism	09110 Biosynthesis of other secondary metabolites	ko00940 Phenylpropanoid biosynthesis	-	GO:0020037/heme binding|GO:0004601/peroxidase activity	GO:0055114/oxidation-reduction process|GO:0006979/response to oxidative stress	PF00141	PTHR31388 PTHR31388:SF29	EC:1.11.1.7
Potri.015G111000	387.964	84.9217	-2.19172	3.94313e-51	5.84892e-49	yes	Chr15:12792456-12796390	+	Chr15:12792456-12796390	+	09100 Metabolism|09140 Cellular Processes|09150 Organismal Systems|09180 Brite Hierarchies	09102 Energy metabolism|09105 Amino acid metabolism|09106 Metabolism of other amino acids|09143 Cell growth and death|09155 Excretory system|09183 Protein families: signaling and cellular processes	ko00910 Nitrogen metabolism|ko00250 Alanine, aspartate and glutamate metabolism|ko00220 Arginine biosynthesis|ko00471 D-Glutamine and D-glutamate metabolism|ko04217 Necroptosis|ko04964 Proximal tubule bicarbonate reclamation|ko04147 Exosome	-	GO:0016491/oxidoreductase activity	GO:0055114/oxidation-reduction process|GO:0006520/cellular amino acid metabolic process	PF00208 PF02812	PTHR11606 PTHR11606:SF12	EC:1.4.1.3	AT5G07440	glutamate dehydrogenase 2
Potri.016G071600	460.656	126.766	-1.86152	8.19227e-50	1.20927e-47	yes	Chr16:5218673-5219749	+	Chr16:5218673-5219749	+	-	-	-	-	-	-	PF03168	PTHR31415 PTHR31415:SF4		AT2G35980	Late embryogenesis abundant (LEA) hydroxyproline-rich glycoprotein family
Potri.004G172300	53.67	342.882	2.67552	1.66192e-49	2.44133e-47	yes	Chr04:18749015-18749845	+	Chr04:18749015-18749845	+	-	-	-	-	GO:0031072/heat shock protein binding	-	PF00226	PTHR24078
Potri.005G096200	6.77648	212.99	4.97411	2.19257e-49	3.19003e-47	yes	Chr05:6802346-6802831	+	Chr05:6802346-6802831	+	-	-	-	-	-	-		PTHR37077
Potri.011G168700	22.6481	260.272	3.52256	2.42808e-49	3.51587e-47	yes	Chr11:19173081-19174564	+	Chr11:19173081-19174564	+	09100 Metabolism|09180 Brite Hierarchies	09102 Energy metabolism|09181 Protein families: metabolism	ko00195 Photosynthesis|ko00194 Photosynthesis proteins	GO:0016020/membrane|GO:0009522/photosystem I	-	GO:0015979/photosynthesis	PF01241	PTHR34195 PTHR34195:SF1		AT1G55670	photosystem I subunit G
Potri.011G162800	202.264	8.03862	-4.65315	3.02031e-49	4.35269e-47	yes	Chr11:18723525-18725347	+	Chr11:18723525-18725347	+	-	-	-	-	GO:0008762/UDP-N-acetylmuramate dehydrogenase activity|GO:0016491/oxidoreductase activity|GO:0050660/flavin adenine dinucleotide binding	GO:0055114/oxidation-reduction process	PF01565 PF08031	PTHR32448 PTHR32448:SF30	EC:1.3.3.8	AT5G44410	FAD-binding Berberine family protein
Potri.004G040600	669.758	255.881	-1.38817	6.27106e-49	8.99483e-47	yes	Chr04:3245712-3247276	-	Chr04:3245712-3247276	-	-	-	-	-	-	-	PF12481	PTHR11772 PTHR11772:SF15
Potri.001G019795	227.391	17.8843	-3.66841	6.84749e-49	9.77552e-47	yes	Chr01:1473517-1475153	+	Chr01:1473517-1475153	+	-	-	-	-	-	-
Potri.003G099400	22.4977	257.078	3.51436	1.1479e-48	1.63109e-46	yes	Chr03:12477510-12481851	+	Chr03:12477510-12481851	+	09100 Metabolism	09102 Energy metabolism	ko00710 Carbon fixation in photosynthetic organisms	-	GO:0016301/kinase activity|GO:0005524/ATP binding	GO:0008152/metabolic process	PF00485	PTHR10285 PTHR10285:SF74	EC:2.7.1.19	AT1G32060	phosphoribulokinase
Potri.013G041700	19.5624	247.794	3.66298	1.66351e-48	2.35275e-46	yes	Chr13:2873940-2875125	+	Chr13:2873940-2875125	+	-	-	-	-	GO:0008061/chitin binding	-	PF00187 PF00967	PTHR22595 PTHR22595:SF62		AT3G04720	pathogenesis-related 4
Potri.009G094600	34.413	286.212	3.05606	1.04965e-47	1.47767e-45	yes	Chr09:8569416-8570361	+	Chr09:8569416-8570361	+	-	-	-	-	-	-	PF04450	PTHR33321		AT2G15130	Plant basic secretory protein (BSP) family protein
Potri.007G111600	224.37	18.5116	-3.59937	1.17765e-47	1.65023e-45	yes	Chr07:13314635-13315545	-	Chr07:13314635-13315545	-	-	-	-	-	GO:0004866/endopeptidase inhibitor activity	-	PF00197	PTHR33107 PTHR33107:SF4
Potri.009G034600	188.505	2.91559	-6.01467	1.63439e-47	2.27976e-45	yes	Chr09:4480359-4482697	-	Chr09:4480359-4482697	-	09180 Brite Hierarchies	09183 Protein families: signaling and cellular processes	ko02000 Transporters	GO:0016020/membrane	GO:0046873/metal ion transmembrane transporter activity	GO:0030001/metal ion transport|GO:0055085/transmembrane transport	PF02535	PTHR11040 PTHR11040:SF23		AT5G59520	ZRT/IRT-like protein 2
Potri.012G060900	232.981	22.1024	-3.39794	1.98452e-47	2.75549e-45	yes	Chr12:6231368-6233258	-	Chr12:6231368-6233258	-	-	-	-	-	-	-	PF04749	PTHR15907 PTHR15907:SF49		AT1G49030	PLAC8 family protein
Potri.005G206200	13.382	223.363	4.06103	4.34426e-47	6.00456e-45	yes	Chr05:21121671-21122463	+	Chr05:21121671-21122463	+	09100 Metabolism|09180 Brite Hierarchies	09102 Energy metabolism|09181 Protein families: metabolism	ko00195 Photosynthesis|ko00194 Photosynthesis proteins	-	-	-	PF13326	PTHR34041 PTHR34041:SF1		AT1G03600	photosystem II family protein
Potri.004G149000	221.802	18.7066	-3.56765	7.60346e-47	1.04618e-44	yes	Chr04:17111074-17112967	+	Chr04:17111074-17112967	+	09100 Metabolism|09180 Brite Hierarchies	09103 Lipid metabolism|09181 Protein families: metabolism	ko00592 alpha-Linolenic acid metabolism|ko00199 Cytochrome P450	-	GO:0020037/heme binding|GO:0009055/electron transfer activity|GO:0016705/oxidoreductase activity, acting on paired donors, with incorporation or reduction of molecular oxygen	GO:0055114/oxidation-reduction process	PF00067	PTHR24286 PTHR24286:SF76
Potri.001G019700	680.271	271.274	-1.32636	1.09192e-46	1.49564e-44	yes	Chr01:1449430-1450447	+	Chr01:1449430-1450447	+	-	-	-	-	-	-
Potri.009G149200	7.03972	202.333	4.84507	1.31377e-46	1.79144e-44	yes	Chr09:11798318-11799727	+	Chr09:11798318-11799727	+	-	-	-	-	-	-		PTHR33270 PTHR33270:SF3		AT2G27830	(1 of 1) PTHR33270:SF3 - EXPRESSED PROTEIN
Potri.001G254100	1.73936	200.668	6.85011	1.32976e-46	1.80515e-44	yes	Chr01:27027270-27027910	-	Chr01:27027270-27027910	-	-	-	-	-	-	-	PF02704	PTHR23201 PTHR23201:SF8
Potri.006G166701	16.1184	226.928	3.81546	6.69845e-46	9.05273e-44	yes	Chr06:16562056-16564667	+	Chr06:16562056-16564667	+	-	-	-	-	-	-	PF00657	PTHR22835 PTHR22835:SF157	EC:3.1.1.3
Potri.005G245700	10.9817	210.454	4.26032	1.02846e-45	1.38378e-43	yes	Chr05:24055524-24056873	-	Chr05:24055524-24056873	-	-	-	-	-	GO:0015035/protein disulfide oxidoreductase activity|GO:0009055/electron transfer activity	GO:0006662/glycerol ether metabolic process|GO:0045454/cell redox homeostasis	PF00085	PTHR10438 PTHR10438:SF247	EC:1.6.5.4	AT1G76080	chloroplastic drought-induced stress protein of 32 kD
Potri.001G240600	59.9175	340.274	2.50565	1.21518e-45	1.6278e-43	yes	Chr01:25810875-25812474	-	Chr01:25810875-25812474	-	-	-	-	-	GO:0004190/aspartic-type endopeptidase activity	GO:0006508/proteolysis	PF14541 PF14543	PTHR13683 PTHR13683:SF268	EC:3.4.23.12
Potri.018G109700	42.7587	298.838	2.80507	1.26491e-45	1.68699e-43	yes	Chr18:12771062-12775644	-	Chr18:12771062-12775644	-	09100 Metabolism	09101 Carbohydrate metabolism	ko00010 Glycolysis / Gluconeogenesis|ko00030 Pentose phosphate pathway	-	GO:0016491/oxidoreductase activity	GO:0055114/oxidation-reduction process	PF00171	PTHR11699 PTHR11699:SF29	EC:1.2.1.9	AT2G24270	aldehyde dehydrogenase 11A3
Potri.013G006100	5.90356	194.063	5.03879	2.5365e-45	3.36811e-43	yes	Chr13:418252-421285	-	Chr13:418252-421285	-	-	-	-	-	GO:0050662/coenzyme binding|GO:0003824/catalytic activity|GO:0008831/dTDP-4-dehydrorhamnose reductase activity	GO:0044237/cellular metabolic process|GO:0045226/extracellular polysaccharide biosynthetic process	PF01370	PTHR10366 PTHR10366:SF289		AT1G09340	chloroplast RNA binding
Potri.009G118100	130.149	485.719	1.89996	3.33834e-45	4.41357e-43	yes	Chr09:9933156-9935570	+	Chr09:9933156-9935570	+	-	-	-	-	GO:0050662/coenzyme binding|GO:0003824/catalytic activity	GO:0044237/cellular metabolic process	PF01370	PTHR10366 PTHR10366:SF375		AT4G39230	NmrA-like negative transcriptional regulator family protein
Potri.008G212400	531.666	182.15	-1.54539	3.49988e-45	4.60712e-43	yes	Chr08:17455306-17456298	+	Chr08:17455306-17456298	+	-	-	-	-	-	GO:0009607/response to biotic stimulus|GO:0006952/defense response	PF00407	PTHR31213 PTHR31213:SF11
Potri.017G078100	628.379	243.325	-1.36875	3.80379e-45	4.98558e-43	yes	Chr17:8668001-8670458	+	Chr17:8668001-8670458	+	-	-	-	GO:0016020/membrane	-	-	PF01145	PTHR10264 PTHR10264:SF92		AT5G62740	SPFH/Band 7/PHB domain-containing membrane-associated protein family
Potri.011G126700	60.579	339.307	2.4857	4.25485e-45	5.55285e-43	yes	Chr11:15666768-15668389	-	Chr11:15666768-15668389	-	09100 Metabolism|09180 Brite Hierarchies	09102 Energy metabolism|09181 Protein families: metabolism	ko00196 Photosynthesis - antenna proteins|ko00194 Photosynthesis proteins	GO:0016020/membrane	-	GO:0009765/photosynthesis, light harvesting	PF00504	PTHR21649 PTHR21649:SF11
Potri.001G184000	60.9202	339.444	2.47818	5.88973e-45	7.65363e-43	yes	Chr01:16300959-16301589	+	Chr01:16300959-16301589	+	09120 Genetic Information Processing|09180 Brite Hierarchies	09122 Translation|09182 Protein families: genetic information processing	ko03010 Ribosome|ko03011 Ribosome	GO:0005840/ribosome|GO:0005622/intracellular	GO:0003735/structural constituent of ribosome	GO:0006412/translation	PF00366	PTHR10744 PTHR10744:SF7		AT1G79850	ribosomal protein S17
Potri.008G205000	224.696	22.8458	-3.29797	8.8792e-45	1.14893e-42	yes	Chr08:14979841-14983028	-	Chr08:14979841-14983028	-	-	-	-	-	-	-	PF04535	PTHR11615 PTHR11615:SF113		AT4G15610	Uncharacterised protein family (UPF0497)
Potri.011G110500	13.2808	213.038	4.0037	1.34386e-44	1.73154e-42	yes	Chr11:14055384-14056850	-	Chr11:14055384-14056850	-	-	-	-	-	GO:0005529/carbohydrate binding	-	PF01453 PF08276	PTHR32444 PTHR32444:SF13		AT1G78860	D-mannose binding lectin protein with Apple-like carbohydrate-binding domain
Potri.007G108401	187.973	9.44934	-4.31417	1.51436e-44	1.94298e-42	yes	Chr07:13073657-13076324	-	Chr07:13073657-13076324	-	09100 Metabolism	09101 Carbohydrate metabolism|09103 Lipid metabolism|09105 Amino acid metabolism	ko00010 Glycolysis / Gluconeogenesis|ko00071 Fatty acid degradation|ko00592 alpha-Linolenic acid metabolism|ko00350 Tyrosine metabolism	-	-	-	PF00107 PF08240	PTHR11695 PTHR11695:SF576	EC:1.1.1.1	AT1G77120	alcohol dehydrogenase 1
Potri.012G068500	13.1536	208.339	3.9854	1.58387e-43	2.02362e-41	yes	Chr12:8932840-8934781	+	Chr12:8932840-8934781	+	-	-	-	-	-	-		PTHR36315 PTHR36315:SF1		AT1G18730	NDH dependent flow 6
Potri.003G171500	50.5574	308.4	2.60881	1.78734e-43	2.27404e-41	yes	Chr03:18017359-18019221	+	Chr03:18017359-18019221	+	09100 Metabolism|09180 Brite Hierarchies	09102 Energy metabolism|09181 Protein families: metabolism	ko00196 Photosynthesis - antenna proteins|ko00194 Photosynthesis proteins	GO:0016020/membrane	-	GO:0009765/photosynthesis, light harvesting	PF00504	PTHR21649 PTHR21649:SF13		AT3G61470	photosystem I light harvesting complex gene 2
Potri.008G213100	296.586	56.603	-2.3895	2.17949e-43	2.76142e-41	yes	Chr08:17342112-17343265	-	Chr08:17342112-17343265	-	-	-	-	-	-	GO:0009607/response to biotic stimulus|GO:0006952/defense response	PF00407	PTHR31213 PTHR31213:SF11
Potri.013G137900	25.8082	244.441	3.24359	2.55795e-43	3.22748e-41	yes	Chr13:15634477-15635785	-	Chr13:15634477-15635785	-	09100 Metabolism|09180 Brite Hierarchies	09102 Energy metabolism|09181 Protein families: metabolism	ko00190 Oxidative phosphorylation|ko00195 Photosynthesis|ko00194 Photosynthesis proteins	GO:0045263/proton-transporting ATP synthase complex, coupling factor F(o)	GO:0015078/proton transmembrane transporter activity	GO:0015986/ATP synthesis coupled proton transport	PF00430|PF00430	PTHR34264|PTHR34264		ATCG00130|ATCG00130	ATPase, F0 complex, subunit B/B', bacterial/chloroplast|ATPase, F0 complex, subunit B/B', bacterial/chloroplast
Potri.001G270400	174.872	1.68255	-6.6995	3.56023e-43	4.47353e-41	yes	Chr01:28477840-28480593	-	Chr01:28477840-28480593	-	-	-	-	-	GO:0020037/heme binding|GO:0009055/electron transfer activity|GO:0016705/oxidoreductase activity, acting on paired donors, with incorporation or reduction of molecular oxygen	GO:0055114/oxidation-reduction process	PF00067	PTHR24286 PTHR24286:SF74
Potri.011G026200	225.65	25.8801	-3.12417	4.74923e-43	5.94299e-41	yes	Chr11:1928988-1929932	+	Chr11:1928988-1929932	+	-	-	-	-	-	GO:0009607/response to biotic stimulus|GO:0006952/defense response	PF00407	PTHR31213 PTHR31213:SF11
Potri.014G019500	107.914	430.194	1.99511	5.41893e-43	6.75323e-41	yes	Chr14:1186767-1188522	-	Chr14:1186767-1188522	-	-	-	-	-	-	-		PTHR32487 PTHR32487:SF0	EC:1.3.1.3	AT4G24220	NAD(P)-binding Rossmann-fold superfamily protein
Potri.006G128000	236.969	30.7023	-2.94828	6.20107e-43	7.69642e-41	yes	Chr06:10371851-10373432	-	Chr06:10371851-10373432	-	09180 Brite Hierarchies	09183 Protein families: signaling and cellular processes	ko02000 Transporters	GO:0016020/membrane	GO:0005215/transporter activity	GO:0006810/transport	PF00230	PTHR19139 PTHR19139:SF167		AT3G53420	plasma membrane intrinsic protein 2A
Potri.013G082800	0	214.157	8.74253	1.94865e-42	2.40872e-40	yes	Chr13:7066171-7067713	-	Chr13:7066171-7067713	-	-	-	-	-	GO:0003824/catalytic activity	GO:0009116/nucleoside metabolic process	PF01048	PTHR21234 PTHR21234:SF20	EC:3.2.2.9
Potri.016G002900	213.061	21.8915	-3.28282	2.12975e-42	2.62192e-40	yes	Chr16:148460-148768	-	Chr16:148460-148768	-	-	-	-	-	-	-
Potri.012G094000	4.34006	177.09	5.35063	4.50271e-42	5.5209e-40	yes	Chr12:11835816-11836025	-	Chr12:11835816-11836025	-	-	-	-	-	-	-		PTHR38398		AT5G50335
Potri.011G134900	14.2811	203.092	3.82996	2.26644e-41	2.76779e-39	yes	Chr11:16755466-16758545	+	Chr11:16755466-16758545	+	09100 Metabolism	09108 Metabolism of cofactors and vitamins	ko00730 Thiamine metabolism	-	GO:0009055/electron transfer activity|GO:0016491/oxidoreductase activity	GO:0055114/oxidation-reduction process	PF01946	PTHR10617 PTHR10617:SF115		AT5G54770	thiazole biosynthetic enzyme, chloroplast (ARA6) (THI1) (THI4)
Potri.005G100400	5.34236	176.385	5.04511	2.28693e-41	2.78164e-39	yes	Chr05:7248787-7252499	+	Chr05:7248787-7252499	+	09100 Metabolism|09130 Environmental Information Processing|09140 Cellular Processes|09150 Organismal Systems|09160 Human Diseases	09101 Carbohydrate metabolism|09105 Amino acid metabolism|09132 Signal transduction|09141 Transport and catabolism|09149 Aging|09164 Neurodegenerative disease	ko00630 Glyoxylate and dicarboxylate metabolism|ko00380 Tryptophan metabolism|ko04016 MAPK signaling pathway - plant|ko04011 MAPK signaling pathway - yeast|ko04068 FoxO signaling pathway|ko04146 Peroxisome|ko04211 Longevity regulating pathway|ko04212 Longevity regulating pathway - worm|ko04213 Longevity regulating pathway - multiple species|ko05014 Amyotrophic lateral sclerosis (ALS)	-	GO:0020037/heme binding|GO:0004096/catalase activity	GO:0055114/oxidation-reduction process|GO:0006979/response to oxidative stress	PF00199 PF06628	PTHR11465 PTHR11465:SF19	EC:1.11.1.21 EC:1.11.1.6
Potri.010G255500	51.1509	298.09	2.54292	6.95939e-41	8.43112e-39	yes	Chr10:22624619-22625361	-	Chr10:22624619-22625361	-	-	-	-	GO:0009536/plastid	GO:0016992/lipoate synthase activity|GO:0051539/4 iron, 4 sulfur cluster binding	GO:0015979/photosynthesis|GO:0009107/lipoate biosynthetic process	PF02941|PF02941	PTHR10949 PTHR10949:SF11|PTHR10949 PTHR10949:SF11	EC:1.8.7.2|EC:1.8.7.2	AT5G08410|AT5G08410	ferredoxin/thioredoxin reductase subunit A (variable subunit) 2|ferredoxin/thioredoxin reductase subunit A (variable subunit) 2
Potri.016G034800	192.533	0	-8.50707	7.60487e-41	9.17654e-39	yes	Chr16:2003332-2005607	-	Chr16:2003332-2005607	-	-	-	-	-	GO:0003824/catalytic activity	GO:0008152/metabolic process	PF00501 PF13193	PTHR24095 PTHR24095:SF189		AT1G68270	AMP-dependent synthetase and ligase family protein
Potri.001G403300	30.3071	245.857	3.02009	9.27838e-41	1.11517e-38	yes	Chr01:42919670-42921959	-	Chr01:42919670-42921959	-	09100 Metabolism	09108 Metabolism of cofactors and vitamins	ko00860 Porphyrin and chlorophyll metabolism	-	GO:0016491/oxidoreductase activity	GO:0008152/metabolic process	PF00106	PTHR24322 PTHR24322:SF393	EC:1.3.1.33	AT4G27440	protochlorophyllide oxidoreductase B
Potri.001G468100	2.31993	170.213	6.19712	1.08195e-40	1.29527e-38	yes	Chr01:49249848-49251790	+	Chr01:49249848-49251790	+	09100 Metabolism|09130 Environmental Information Processing|09180 Brite Hierarchies	09101 Carbohydrate metabolism|09102 Energy metabolism|09132 Signal transduction|09182 Protein families: genetic information processing|09183 Protein families: signaling and cellular processes	ko00010 Glycolysis / Gluconeogenesis|ko00030 Pentose phosphate pathway|ko00051 Fructose and mannose metabolism|ko00710 Carbon fixation in photosynthetic organisms|ko00680 Methane metabolism|ko04066 HIF-1 signaling pathway|ko04131 Membrane trafficking|ko03036 Chromosome and associated proteins|ko04147 Exosome	-	GO:0004332/fructose-bisphosphate aldolase activity	GO:0006096/glycolytic process	PF00274|PF00274	PTHR11627 PTHR11627:SF19|PTHR11627 PTHR11627:SF19	EC:4.1.2.13|EC:4.1.2.13	AT4G26530|AT4G26530	Aldolase superfamily protein|Aldolase superfamily protein
Potri.005G246100	146.092	491.166	1.74933	1.11402e-40	1.32844e-38	yes	Chr05:24082924-24083430	-	Chr05:24082924-24083430	-	09100 Metabolism|09180 Brite Hierarchies	09102 Energy metabolism|09181 Protein families: metabolism	ko00195 Photosynthesis|ko00194 Photosynthesis proteins	-	GO:0009055/electron transfer activity|GO:0005507/copper ion binding	-	PF00127	PTHR34192 PTHR34192:SF2		AT1G76100	plastocyanin 1
Potri.005G195700	524.016	192.859	-1.44207	1.12845e-40	1.34039e-38	yes	Chr05:20273200-20275549	+	Chr05:20273200-20275549	+	09100 Metabolism	09110 Biosynthesis of other secondary metabolites	ko00940 Phenylpropanoid biosynthesis	-	GO:0020037/heme binding|GO:0004601/peroxidase activity	GO:0055114/oxidation-reduction process|GO:0006979/response to oxidative stress	PF00141	PTHR31235 PTHR31235:SF77	EC:1.11.1.7	AT1G71695	Peroxidase superfamily protein
Potri.006G051100	25.8646	233.465	3.17416	1.19219e-40	1.41058e-38	yes	Chr06:3551252-3557179	-	Chr06:3551252-3557179	-	09100 Metabolism	09108 Metabolism of cofactors and vitamins	ko00860 Porphyrin and chlorophyll metabolism	-	GO:0016851/magnesium chelatase activity	GO:0009058/biosynthetic process	PF02514 PF11965|PF02514 PF11965	PTHR23304 PTHR23304:SF115|PTHR23304 PTHR23304:SF115	EC:6.6.1.1|EC:6.6.1.1	AT5G13630|AT5G13630	magnesium-chelatase subunit chlH, chloroplast, putative / Mg-protoporphyrin IX chelatase, putative (CHLH)|magnesium-chelatase subunit chlH, chloroplast, putative / Mg-protoporphyrin IX chelatase, putative (CHLH)
Potri.018G089400	0	367.177	12.5688	2.9184e-40	3.43964e-38	yes	Chr18:10872617-10874506	-	Chr18:10872617-10874506	-	-	-	-	-	GO:0016788/hydrolase activity, acting on ester bonds	GO:0006629/lipid metabolic process	PF00657	PTHR22835 PTHR22835:SF157	EC:3.1.1.3
Potri.001G293300	157.95	3.40514	-5.53561	3.44107e-40	4.04e-38	yes	Chr01:30508309-30510815	-	Chr01:30508309-30510815	-	-	-	-	-	GO:0005515/protein binding	-	PF00564 PF02042|PF00564 PF02042|PF00564 PF02042	PTHR32002 PTHR32002:SF3|PTHR32002 PTHR32002:SF3|PTHR32002 PTHR32002:SF3
Potri.018G089900	188.447	0	-8.4671	3.44594e-40	4.03016e-38	yes	Chr18:10978098-10980106	+	Chr18:10978098-10980106	+	09100 Metabolism	09110 Biosynthesis of other secondary metabolites	ko00940 Phenylpropanoid biosynthesis	-	GO:0020037/heme binding|GO:0004601/peroxidase activity	GO:0055114/oxidation-reduction process|GO:0006979/response to oxidative stress	PF00141	PTHR31517 PTHR31517:SF10	EC:1.11.1.7	AT2G18980	Peroxidase superfamily protein
Potri.018G096049	246.474	39.7306	-2.63311	4.06067e-40	4.73091e-38	yes	Chr18:11644407-11651362	+	Chr18:11644407-11651362	+	09100 Metabolism	09101 Carbohydrate metabolism	ko00040 Pentose and glucuronate interconversions|ko00051 Fructose and mannose metabolism	-	-	-		PTHR32176 PTHR32176:SF0|PTHR32176 PTHR32176:SF0|PTHR32176 PTHR32176:SF0	EC:5.3.1.5|EC:5.3.1.5|EC:5.3.1.5	AT5G57655|AT5G57655|AT5G57655	xylose isomerase family protein|xylose isomerase family protein|xylose isomerase family protein
Potri.001G256800	30.6501	243.13	2.98776	6.61279e-40	7.67487e-38	yes	Chr01:27282533-27285963	+	Chr01:27282533-27285963	+	09120 Genetic Information Processing|09180 Brite Hierarchies	09122 Translation|09182 Protein families: genetic information processing	ko03010 Ribosome|ko03011 Ribosome	GO:0005840/ribosome|GO:0005622/intracellular	GO:0003723/RNA binding|GO:0003735/structural constituent of ribosome	GO:0006412/translation	PF00333 PF03719	PTHR13718 PTHR13718:SF69
Potri.003G082300	0	280.845	11.139	1.17241e-39	1.35554e-37	yes	Chr03:10906508-10907190	-	Chr03:10906508-10907190	-	-	-	-	-	-	-		PTHR39944 PTHR39944:SF2|PTHR39944 PTHR39944:SF2
Potri.008G131300	2.00871	165.977	6.36857	1.44125e-39	1.66006e-37	yes	Chr08:8642581-8643680	-	Chr08:8642581-8643680	-	-	-	-	-	-	GO:0009607/response to biotic stimulus|GO:0006952/defense response	PF00407	PTHR31338 PTHR31338:SF15
Potri.004G067800	7.04135	173.056	4.61925	2.13655e-39	2.45163e-37	yes	Chr04:5769318-5770287	-	Chr04:5769318-5770287	-	-	-	-	-	GO:0004866/endopeptidase inhibitor activity	-	PF00197	PTHR33107 PTHR33107:SF5
Potri.016G106900	6.38945	170.857	4.74095	2.54012e-39	2.90376e-37	yes	Chr16:11184676-11187007	+	Chr16:11184676-11187007	+	09100 Metabolism|09130 Environmental Information Processing|09150 Organismal Systems|09180 Brite Hierarchies	09101 Carbohydrate metabolism|09102 Energy metabolism|09132 Signal transduction|09152 Endocrine system|09183 Protein families: signaling and cellular processes	ko00010 Glycolysis / Gluconeogenesis|ko00030 Pentose phosphate pathway|ko00051 Fructose and mannose metabolism|ko00710 Carbon fixation in photosynthetic organisms|ko00680 Methane metabolism|ko04152 AMPK signaling pathway|ko04910 Insulin signaling pathway|ko04922 Glucagon signaling pathway|ko04147 Exosome	-	GO:0042578/phosphoric ester hydrolase activity	GO:0005975/carbohydrate metabolic process	PF00316|PF00316	PTHR11556 PTHR11556:SF16|PTHR11556 PTHR11556:SF16	EC:3.1.3.11|EC:3.1.3.11	AT3G54050|AT3G54050	high cyclic electron flow 1|high cyclic electron flow 1
Potri.005G078700	4.55343	165.326	5.18221	3.82509e-39	4.35631e-37	yes	Chr05:5346977-5350431	-	Chr05:5346977-5350431	-	09100 Metabolism	09101 Carbohydrate metabolism|09110 Biosynthesis of other secondary metabolites	ko00562 Inositol phosphate metabolism|ko00521 Streptomycin biosynthesis	-	-	GO:0008654/phospholipid biosynthetic process	PF01658 PF07994|PF01658 PF07994	PTHR11510 PTHR11510:SF6|PTHR11510 PTHR11510:SF6	EC:5.5.1.4|EC:5.5.1.4	AT4G39800|AT4G39800	myo-inositol-1-phosphate synthase 1|myo-inositol-1-phosphate synthase 1
Potri.014G127000	152.904	2.35195	-6.02262	7.27973e-39	8.25978e-37	yes	Chr14:8536606-8538650	+	Chr14:8536606-8538650	+	09100 Metabolism|09130 Environmental Information Processing	09101 Carbohydrate metabolism|09132 Signal transduction	ko00040 Pentose and glucuronate interconversions|ko02020 Two-component system	GO:0005618/cell wall	GO:0004857/enzyme inhibitor activity|GO:0030599/pectinesterase activity	GO:0042545/cell wall modification	PF01095 PF04043	PTHR31707 PTHR31707:SF31	EC:3.1.1.11	AT4G02330	Plant invertase/pectin methylesterase inhibitor superfamily
Potri.002G055566	7.84292	172.936	4.46271	8.99333e-39	1.01661e-36	yes	Chr02:3790202-3791114	-	Chr02:3790202-3791114	-	-	-	-	-	-	-
Potri.001G309900	285.366	60.9162	-2.22792	9.10495e-39	1.02542e-36	yes	Chr01:32053935-32054516	+	Chr01:32053935-32054516	+	-	-	-	-	GO:0004866/endopeptidase inhibitor activity	-	PF00197	PTHR33107 PTHR33107:SF4
Potri.014G106400	26.1094	226.008	3.11373	1.02969e-38	1.15538e-36	yes	Chr14:7145176-7148007	+	Chr14:7145176-7148007	+	-	-	-	-	-	-	PF14159|PF14159	PTHR33222 PTHR33222:SF9|PTHR33222 PTHR33222:SF9		AT2G46820|AT2G46820	photosystem I P subunit|photosystem I P subunit
Potri.002G088500	16.5626	197.67	3.57709	2.37334e-38	2.65326e-36	yes	Chr02:6389319-6390137	-	Chr02:6389319-6390137	-	-	-	-	-	-	-	PF13499 PF13833	PTHR10891
Potri.017G111225	5.21261	163.031	4.96699	3.39627e-38	3.78292e-36	yes	Chr17:11895200-11895916	+	Chr17:11895200-11895916	+	-	-	-	-	-	-
Potri.005G186800	5.48989	162.824	4.89039	5.7797e-38	6.4142e-36	yes	Chr05:19433724-19435121	+	Chr05:19433724-19435121	+	09150 Organismal Systems|09160 Human Diseases|09180 Brite Hierarchies	09151 Immune system|09166 Cardiovascular disease|09182 Protein families: genetic information processing	ko04621 NOD-like receptor signaling pathway|ko05418 Fluid shear stress and atherosclerosis|ko03110 Chaperones and folding catalysts	-	GO:0015035/protein disulfide oxidoreductase activity|GO:0009055/electron transfer activity	GO:0006662/glycerol ether metabolic process|GO:0045454/cell redox homeostasis	PF13098	PTHR10438 PTHR10438:SF290	EC:1.8.1.8
Potri.010G151000	67.6609	321.5	2.24843	5.81827e-38	6.43353e-36	yes	Chr10:16111064-16112021	+	Chr10:16111064-16112021	+	-	-	-	-	-	-	PF07876	PTHR33178
Potri.005G063300	29.5288	231.348	2.96987	7.83593e-38	8.63316e-36	yes	Chr05:4072645-4073553	+	Chr05:4072645-4073553	+	09100 Metabolism|09180 Brite Hierarchies	09102 Energy metabolism|09181 Protein families: metabolism	ko00195 Photosynthesis|ko00194 Photosynthesis proteins	GO:0042651/thylakoid membrane|GO:0009522/photosystem I	GO:0005516/calmodulin binding	GO:0015979/photosynthesis	PF05479	PTHR36814		AT5G64040	photosystem I reaction center subunit PSI-N, chloroplast, putative / PSI-N, putative (PSAN)
Potri.001G389800	148.699	3.74408	-5.31164	8.37409e-38	9.19275e-36	yes	Chr01:41224945-41227151	-	Chr01:41224945-41227151	-	-	-	-	-	-	-		PTHR31723		AT1G78780	pathogenesis-related family protein
Potri.006G017700	153.057	6.0947	-4.65037	1.10498e-37	1.20864e-35	yes	Chr06:1110003-1110658	+	Chr06:1110003-1110658	+	-	-	-	-	-	-		PTHR33513 PTHR33513:SF2		AT5G55620
Potri.008G204100	3.28419	155.949	5.5694	1.86303e-37	2.0305e-35	yes	Chr08:14852648-14853105	+	Chr08:14852648-14853105	+	-	-	-	-	-	-		PTHR34956 PTHR34956:SF2		AT3G06070
Potri.009G097300	244.771	44.2622	-2.46729	2.48004e-37	2.69333e-35	yes	Chr09:8739429-8741801	+	Chr09:8739429-8741801	+	-	-	-	-	-	-	PF04199	PTHR31118	EC:3.5.1.9
Potri.004G182100	0	204.551	9.49938	4.24644e-37	4.59522e-35	yes	Chr04:19621601-19623260	-	Chr04:19621601-19623260	-	09100 Metabolism|09130 Environmental Information Processing	09101 Carbohydrate metabolism|09132 Signal transduction	ko00520 Amino sugar and nucleotide sugar metabolism|ko04016 MAPK signaling pathway - plant	-	GO:0008061/chitin binding|GO:0004568/chitinase activity	GO:0016998/cell wall macromolecule catabolic process|GO:0006032/chitin catabolic process	PF00182 PF00187	PTHR22595 PTHR22595:SF34	EC:3.2.1.14
Potri.010G060900	186.069	19.5859	-3.24796	6.1551e-37	6.63703e-35	yes	Chr10:9089109-9090154	-	Chr10:9089109-9090154	-	09100 Metabolism|09150 Organismal Systems|09160 Human Diseases|09180 Brite Hierarchies	09106 Metabolism of other amino acids|09111 Xenobiotics biodegradation and metabolism|09149 Aging|09161 Cancer: overview|09162 Cancer: specific types|09166 Cardiovascular disease|09176 Drug resistance: antineoplastic|09183 Protein families: signaling and cellular processes	ko00480 Glutathione metabolism|ko00980 Metabolism of xenobiotics by cytochrome P450|ko00982 Drug metabolism - cytochrome P450|ko00983 Drug metabolism - other enzymes|ko04212 Longevity regulating pathway - worm|ko05200 Pathways in cancer|ko05204 Chemical carcinogenesis|ko05225 Hepatocellular carcinoma|ko05418 Fluid shear stress and atherosclerosis|ko01524 Platinum drug resistance|ko02000 Transport…	-	GO:0005515/protein binding	-	PF00043 PF02798	PTHR11260 PTHR11260:SF227	EC:2.5.1.18
Potri.T124804	455.14	164.081	-1.4719	1.59074e-36	1.70924e-34	yes	scaffold_502:34155-34877	+	scaffold_502:34155-34877	+	-	-	-	-	-	-
Potri.019G054800	40.1911	252.355	2.65051	1.61257e-36	1.72658e-34	yes	Chr19:9259474-9261203	-	Chr19:9259474-9261203	-	09150 Organismal Systems|09160 Human Diseases|09180 Brite Hierarchies	09151 Immune system|09166 Cardiovascular disease|09182 Protein families: genetic information processing	ko04621 NOD-like receptor signaling pathway|ko05418 Fluid shear stress and atherosclerosis|ko03110 Chaperones and folding catalysts	-	GO:0015035/protein disulfide oxidoreductase activity|GO:0009055/electron transfer activity	GO:0006662/glycerol ether metabolic process|GO:0045454/cell redox homeostasis	PF00085	PTHR10438 PTHR10438:SF258	EC:1.6.5.4	AT5G16400	thioredoxin F2
Potri.001G270600	339.763	95.4021	-1.83244	1.71487e-36	1.82968e-34	yes	Chr01:28508066-28510980	-	Chr01:28508066-28510980	-	-	-	-	-	GO:0020037/heme binding|GO:0009055/electron transfer activity|GO:0016705/oxidoreductase activity, acting on paired donors, with incorporation or reduction of molecular oxygen	GO:0055114/oxidation-reduction process	PF00067	PTHR24286 PTHR24286:SF74
Potri.006G010300	169.078	0	-8.41283	1.90842e-36	2.02907e-34	yes	Chr06:680316-682020	-	Chr06:680316-682020	-	09100 Metabolism	09110 Biosynthesis of other secondary metabolites	ko00940 Phenylpropanoid biosynthesis|ko00945 Stilbenoid, diarylheptanoid and gingerol biosynthesis|ko00941 Flavonoid biosynthesis	-	GO:0016747/transferase activity, transferring acyl groups other than amino-acyl groups	-	PF02458	PTHR31623 PTHR31623:SF3	EC:2.3.1.160
Potri.014G120700	16.6237	190.013	3.51479	1.98757e-36	2.10585e-34	yes	Chr14:8103986-8104731	+	Chr14:8103986-8104731	+	-	-	-	-	-	-	PF02672	PTHR33921 PTHR33921:SF2		AT2G47400	CP12 domain-containing protein 1
Potri.009G107200	153.952	0	-7.53598	3.50346e-36	3.68627e-34	yes	Chr09:9326258-9327857	-	Chr09:9326258-9327857	-	-	-	-	GO:0031227/intrinsic component of endoplasmic reticulum membrane	GO:0016788/hydrolase activity, acting on ester bonds	GO:0006886/intracellular protein transport|GO:0006505/GPI anchor metabolic process	PF12697	PTHR10992 PTHR10992:SF784		AT3G50440	methyl esterase 10
Potri.008G050700	148.128	6.43964	-4.52372	3.62296e-36	3.79886e-34	yes	Chr08:2972954-2974137	+	Chr08:2972954-2974137	+	09180 Brite Hierarchies	09183 Protein families: signaling and cellular processes	ko02000 Transporters	GO:0016020/membrane	GO:0005215/transporter activity	GO:0006810/transport	PF00230	PTHR19139 PTHR19139:SF55		AT4G01470	tonoplast intrinsic protein 1;3
Potri.016G136100	1.22491	154.983	6.98328	3.8508e-36	4.02389e-34	yes	Chr16:14010651-14014028	-	Chr16:14010651-14014028	-	09190 Not Included in Pathway or Brite	09191 Unclassified: metabolism	ko99980 Enzymes with EC numbers	-	GO:0008270/zinc ion binding|GO:0016491/oxidoreductase activity	GO:0055114/oxidation-reduction process	PF08240 PF13602	PTHR11695 PTHR11695:SF552	EC:1.3.1.105 EC:1.3.1.74	AT1G23740	Oxidoreductase, zinc-binding dehydrogenase family protein
Potri.014G151101	188.571	0	-9.36975	3.94554e-36	4.10876e-34	yes	Chr14:10501383-10506258	+	Chr14:10501383-10506258	+	-	-	-	-	-	-	PF01190|PF01190
Potri.003G062400	195.709	24.8312	-2.97848	4.44642e-36	4.61457e-34	yes	Chr03:8929113-8931284	-	Chr03:8929113-8931284	-	-	-	-	-	-	-	PF12681	PTHR10374 PTHR10374:SF18	EC:4.4.1.5	AT1G15380	Lactoylglutathione lyase / glyoxalase I family protein
Potri.002G073000	7.78725	161.885	4.37771	4.55625e-36	4.71246e-34	yes	Chr02:5141925-5143106	-	Chr02:5141925-5143106	-	09150 Organismal Systems|09160 Human Diseases|09180 Brite Hierarchies	09151 Immune system|09166 Cardiovascular disease|09182 Protein families: genetic information processing	ko04621 NOD-like receptor signaling pathway|ko05418 Fluid shear stress and atherosclerosis|ko03110 Chaperones and folding catalysts	-	GO:0015035/protein disulfide oxidoreductase activity|GO:0009055/electron transfer activity	GO:0006662/glycerol ether metabolic process|GO:0045454/cell redox homeostasis	PF13098	PTHR10438 PTHR10438:SF290	EC:1.8.1.8
Potri.015G003100	150.409	0	-7.39735	8.99736e-36	9.2743e-34	yes	Chr15:211116-214109	-	Chr15:211116-214109	-	09100 Metabolism	09110 Biosynthesis of other secondary metabolites	ko00940 Phenylpropanoid biosynthesis	-	GO:0046983/protein dimerization activity|GO:0008171/O-methyltransferase activity	-	PF00891 PF08100	PTHR11746 PTHR11746:SF106	EC:2.1.1.68	AT5G54160	O-methyltransferase 1
Potri.001G311700	516.153	206.177	-1.32391	9.49991e-36	9.75923e-34	yes	Chr01:32225501-32226556	-	Chr01:32225501-32226556	-	-	-	-	-	-	-	PF04674	PTHR31279 PTHR31279:SF12		AT5G64260	EXORDIUM like 2
Potri.002G101101	211.577	32.2307	-2.71468	1.0298e-35	1.05435e-33	yes	Chr02:7394494-7395227	+	Chr02:7394494-7395227	+	-	-	-	-	-	-		PTHR36321
Potri.002G120700	0	178.08	8.7238	1.18755e-35	1.21177e-33	yes	Chr02:9154641-9156326	-	Chr02:9154641-9156326	-	-	-	-	-	-	-	PF01370|PF01370	PTHR32487 PTHR32487:SF0|PTHR32487 PTHR32487:SF0	EC:1.3.1.3|EC:1.3.1.3	AT4G24220|AT4G24220	NAD(P)-binding Rossmann-fold superfamily protein|NAD(P)-binding Rossmann-fold superfamily protein
Potri.002G166800	57.0319	286.699	2.3297	1.51885e-35	1.54466e-33	yes	Chr02:12777279-12779736	-	Chr02:12777279-12779736	-	-	-	-	-	-	-	PF14159	PTHR33222 PTHR33222:SF4		AT4G01150	(1 of 1) PTHR33222:SF4 - PROTEIN CURVATURE THYLAKOID 1A, CHLOROPLASTIC
Potri.001G235500	172.084	16.4679	-3.38539	2.17882e-35	2.20846e-33	yes	Chr01:25398625-25400206	-	Chr01:25398625-25400206	-	09180 Brite Hierarchies	09182 Protein families: genetic information processing	ko03000 Transcription factors	-	GO:0003677/DNA binding	-	PF00249|PF00249|PF00249	PTHR10641 PTHR10641:SF484|PTHR10641 PTHR10641:SF484|PTHR10641 PTHR10641:SF484		AT5G59780|AT5G59780|AT5G59780	myb domain protein 59|myb domain protein 59|myb domain protein 59
Potri.013G148900	2.47023	146.244	5.88758	2.57204e-35	2.59836e-33	yes	Chr13:14538154-14540456	-	Chr13:14538154-14540456	-	09100 Metabolism|09180 Brite Hierarchies	09102 Energy metabolism|09181 Protein families: metabolism	ko00195 Photosynthesis|ko00194 Photosynthesis proteins	GO:0042651/thylakoid membrane	GO:0051537/2 iron, 2 sulfur cluster binding	GO:0055114/oxidation-reduction process	PF00355 PF08802	PTHR10134 PTHR10134:SF5	EC:1.10.9.1	AT4G03280	photosynthetic electron transfer C
Potri.001G036600	137.625	1.85125	-6.21609	5.3787e-35	5.41575e-33	yes	Chr01:2671917-2673150	-	Chr01:2671917-2673150	-	-	-	-	-	GO:0008146/sulfotransferase activity	-	PF00685	PTHR11783 PTHR11783:SF74
Potri.001G229500	142.996	6.54957	-4.44843	9.54935e-35	9.58339e-33	yes	Chr01:24880007-24881302	+	Chr01:24880007-24881302	+	-	-	-	-	GO:0047134/protein-disulfide reductase activity	GO:0055114/oxidation-reduction process	PF07649	PTHR13871 PTHR13871:SF36
Potri.002G180400	26.0787	208.915	3.00198	1.08612e-34	1.08641e-32	yes	Chr02:14172064-14173983	+	Chr02:14172064-14173983	+	-	-	-	-	-	-	PF14159	PTHR33222 PTHR33222:SF9		AT2G46820	photosystem I P subunit
Potri.014G019400	38.7628	240.386	2.63261	1.30745e-34	1.3035e-32	yes	Chr14:1179385-1181107	-	Chr14:1179385-1181107	-	-	-	-	-	-	-		PTHR32487 PTHR32487:SF0	EC:1.3.1.3	AT4G24220	NAD(P)-binding Rossmann-fold superfamily protein
Potri.006G275000	148.887	460.101	1.62773	1.99883e-34	1.98629e-32	yes	Chr06:26658295-26665539	-	Chr06:26658295-26665539	-	09100 Metabolism	09102 Energy metabolism	ko00190 Oxidative phosphorylation	GO:0016020/membrane	GO:0046872/metal ion binding|GO:0015662/ATPase activity, coupled to transmembrane movement of ions, phosphorylative mechanism|GO:0000166/nucleotide binding|GO:0003824/catalytic activity	GO:0008152/metabolic process|GO:0006812/cation transport|GO:0006754/ATP biosynthetic process	PF00122 PF00690 PF00702	PTHR24093 PTHR24093:SF361	EC:3.6.3.6	AT2G24520	H(+)-ATPase 5
Potri.006G052800	389.157	130.923	-1.57163	2.89368e-34	2.86616e-32	yes	Chr06:3653691-3659548	-	Chr06:3653691-3659548	-	09100 Metabolism	09101 Carbohydrate metabolism	ko00052 Galactose metabolism	-	-	-	PF05691|PF05691|PF05691	PTHR31268 PTHR31268:SF9|PTHR31268 PTHR31268:SF9|PTHR31268 PTHR31268:SF9	EC:2.4.1.82|EC:2.4.1.82|EC:2.4.1.82	AT3G57520|AT3G57520|AT3G57520	seed imbibition 2|seed imbibition 2|seed imbibition 2
Potri.013G082066	0	163.461	8.35281	3.66665e-34	3.61998e-32	yes	Chr13:7026141-7029788	-	Chr13:7026141-7029788	-	-	-	-	-	-	-	PF01048|PF01048	PTHR21234 PTHR21234:SF20|PTHR21234 PTHR21234:SF20	EC:3.2.2.9|EC:3.2.2.9
Potri.016G046500	134.168	3.71625	-5.17405	3.79412e-34	3.7337e-32	yes	Chr16:2973589-2974752	+	Chr16:2973589-2974752	+	-	-	-	-	-	GO:0009607/response to biotic stimulus|GO:0006952/defense response	PF00407	PTHR31213 PTHR31213:SF11
Potri.002G104400	98.3794	363.67	1.8862	6.15675e-34	6.03918e-32	yes	Chr02:7656294-7658420	-	Chr02:7656294-7658420	-	09180 Brite Hierarchies	09183 Protein families: signaling and cellular processes	ko02000 Transporters	-	-	-	PF00153	PTHR24089 PTHR24089:SF392		AT2G22500	uncoupling protein 5
Potri.007G002100	200.719	30.7195	-2.70795	6.89142e-34	6.73808e-32	yes	Chr07:126766-132258	-	Chr07:126766-132258	-	09100 Metabolism	09109 Metabolism of terpenoids and polyketides	ko00909 Sesquiterpenoid and triterpenoid biosynthesis	-	GO:0003824/catalytic activity	-	PF00432|PF00432	PTHR11764 PTHR11764:SF16|PTHR11764 PTHR11764:SF16	EC:5.4.99.39|EC:5.4.99.39
Potri.019G093400	1.06587	145.475	7.0926	8.04657e-34	7.84231e-32	yes	Chr19:13056118-13058427	-	Chr19:13056118-13058427	-	09100 Metabolism	09109 Metabolism of terpenoids and polyketides	ko00906 Carotenoid biosynthesis	-	-	-	PF03055	PTHR10543 PTHR10543:SF46	EC:1.13.11.51 EC:1.14.99.42	AT4G19170	nine-cis-epoxycarotenoid dioxygenase 4
Potri.015G062100	40.4888	240.725	2.57179	9.0344e-34	8.77693e-32	yes	Chr15:8665559-8672387	+	Chr15:8665559-8672387	+	09100 Metabolism	09101 Carbohydrate metabolism|09102 Energy metabolism	ko00030 Pentose phosphate pathway|ko00040 Pentose and glucuronate interconversions|ko00710 Carbon fixation in photosynthetic organisms	-	-	GO:0005975/carbohydrate metabolic process	PF00834	PTHR11749 PTHR11749:SF4	EC:5.1.3.1	AT5G61410	D-ribulose-5-phosphate-3-epimerase
Potri.007G120300	172.042	0	-9.22918	1.04451e-33	1.01151e-31	yes	Chr07:13822045-13823032	+	Chr07:13822045-13823032	+	-	-	-	-	-	-	PF01657	PTHR32411
Potri.001G110200	34.9793	226.886	2.69739	1.23113e-33	1.18845e-31	yes	Chr01:8876530-8878314	+	Chr01:8876530-8878314	+	09150 Organismal Systems|09180 Brite Hierarchies	09159 Environmental adaptation|09182 Protein families: genetic information processing|09183 Protein families: signaling and cellular processes	ko04626 Plant-pathogen interaction|ko03012 Translation factors|ko03029 Mitochondrial biogenesis|ko04147 Exosome	GO:0005622/intracellular	GO:0003746/translation elongation factor activity|GO:0003924/GTPase activity|GO:0005525/GTP binding	GO:0006414/translational elongation	PF00009 PF03143 PF03144|PF00009 PF03143 PF03144	PTHR23115 PTHR23115:SF146|PTHR23115 PTHR23115:SF146	EC:3.6.5.3|EC:3.6.5.3	AT4G20360|AT4G20360	RAB GTPase homolog E1B|RAB GTPase homolog E1B
Potri.006G087701	17.5799	181.268	3.36613	1.26805e-33	1.22021e-31	yes	Chr06:6618318-6619003	-	Chr06:6618318-6619003	-	-	-	-	-	-	-		PTHR36389 PTHR36389:SF1		AT5G02160
Potri.002G160800	15.1966	173.444	3.51265	2.20151e-33	2.11178e-31	yes	Chr02:12291832-12295367	+	Chr02:12291832-12295367	+	09100 Metabolism	09102 Energy metabolism|09105 Amino acid metabolism|09106 Metabolism of other amino acids	ko00920 Sulfur metabolism|ko00270 Cysteine and methionine metabolism|ko00460 Cyanoamino acid metabolism	-	GO:0030170/pyridoxal phosphate binding|GO:0003824/catalytic activity	GO:0008152/metabolic process	PF00291	PTHR10314 PTHR10314:SF80	EC:4.4.1.9	AT3G61440	cysteine synthase C1
Potri.008G063800	10.3337	158.859	3.94232	2.29185e-33	2.19153e-31	yes	Chr08:3851118-3857159	+	Chr08:3851118-3857159	+	09100 Metabolism	09102 Energy metabolism	ko00710 Carbon fixation in photosynthetic organisms	-	GO:0042578/phosphoric ester hydrolase activity	GO:0005975/carbohydrate metabolic process	PF00316|PF00316 PF08328|PF00316|PF00316	PTHR11556 PTHR11556:SF2|PTHR11556 PTHR11556:SF2|PTHR11556 PTHR11556:SF2|PTHR11556 PTHR11556:SF2	EC:3.1.3.37|EC:3.1.3.37|EC:3.1.3.37|EC:3.1.3.37	AT3G55800|AT3G55800|AT3G55800|AT3G55800	sedoheptulose-bisphosphatase|sedoheptulose-bisphosphatase|sedoheptulose-bisphosphatase|sedoheptulose-bisphosphatase
Potri.011G146900	149.851	11.1169	-3.75271	2.76308e-33	2.63384e-31	yes	Chr11:17504692-17509705	-	Chr11:17504692-17509705	-	09180 Brite Hierarchies	09183 Protein families: signaling and cellular processes	ko02000 Transporters	GO:0016020/membrane	GO:0005215/transporter activity	GO:0006810/transport	PF00230	PTHR19139 PTHR19139:SF102		AT4G10380	NOD26-like intrinsic protein 5;1
Potri.006G141400	0	261.441	11.7985	2.84788e-33	2.7062e-31	yes	Chr06:11903848-11906522	+	Chr06:11903848-11906522	+	-	-	-	-	GO:0020037/heme binding|GO:0009055/electron transfer activity|GO:0016705/oxidoreductase activity, acting on paired donors, with incorporation or reduction of molecular oxygen	GO:0055114/oxidation-reduction process	PF00067	PTHR24298 PTHR24298:SF67	EC:1.14.13.21
Potri.006G222300	14.1648	169.943	3.58466	2.8962e-33	2.74354e-31	yes	Chr06:22759102-22759919	-	Chr06:22759102-22759919	-	-	-	-	GO:0016020/membrane|GO:0009523/photosystem II	-	GO:0015979/photosynthesis	PF06596	PTHR34455 PTHR34455:SF1		AT2G06520	photosystem II subunit X
Potri.012G012300	135.244	1.02232	-7.04758	3.96905e-33	3.74816e-31	yes	Chr12:1455890-1458370	+	Chr12:1455890-1458370	+	-	-	-	-	-	GO:0006457/protein folding	PF00254|PF00254
Potri.001G134000	3.40816	134.834	5.30605	2.14574e-32	2.02005e-30	yes	Chr01:10898607-10901699	-	Chr01:10898607-10901699	-	09100 Metabolism	09102 Energy metabolism	ko00710 Carbon fixation in photosynthetic organisms	-	GO:0016301/kinase activity|GO:0005524/ATP binding	GO:0008152/metabolic process	PF00485	PTHR10285 PTHR10285:SF74	EC:2.7.1.19	AT1G32060	phosphoribulokinase
Potri.002G189300	15.6595	170.687	3.44624	2.21382e-32	2.07771e-30	yes	Chr02:15132669-15133711	+	Chr02:15132669-15133711	+	09100 Metabolism|09180 Brite Hierarchies	09102 Energy metabolism|09181 Protein families: metabolism	ko00196 Photosynthesis - antenna proteins|ko00194 Photosynthesis proteins	GO:0016020/membrane	-	GO:0009765/photosynthesis, light harvesting	PF00504	PTHR21649 PTHR21649:SF20
Potri.011G074100	27.5649	202.426	2.87649	2.82626e-32	2.64433e-30	yes	Chr11:7851511-7851690	-	Chr11:7851511-7851690	-	-	-	-	-	-	-
Potri.003G128800	193.328	30.4247	-2.66774	3.07329e-32	2.86665e-30	yes	Chr03:14757519-14760410	+	Chr03:14757519-14760410	+	09190 Not Included in Pathway or Brite	09193 Unclassified: signaling and cellular processes	ko99995 Signaling proteins	-	GO:0016491/oxidoreductase activity|GO:0050662/coenzyme binding	GO:0044237/cellular metabolic process	PF00106	PTHR24320 PTHR24320:SF100	EC:1.1.1.330
Potri.005G135300	147.61	11.839	-3.64017	3.51571e-32	3.26929e-30	yes	Chr05:10459403-10461109	+	Chr05:10459403-10461109	+	09100 Metabolism	09110 Biosynthesis of other secondary metabolites	ko00940 Phenylpropanoid biosynthesis	-	GO:0020037/heme binding|GO:0004601/peroxidase activity	GO:0055114/oxidation-reduction process|GO:0006979/response to oxidative stress	PF00141	PTHR31388 PTHR31388:SF34	EC:1.11.1.7
Potri.017G142923	0	138.957	7.33927	6.94304e-32	6.43671e-30	yes	Chr17:14329159-14329752	-	Chr17:14329159-14329752	-	-	-	-	-	-	-
Potri.015G085100	184.374	27.1542	-2.76339	7.25063e-32	6.70143e-30	yes	Chr15:10976728-10978053	+	Chr15:10976728-10978053	+	-	-	-	-	-	-	PF16974	PTHR34806 PTHR34806:SF1		AT5G50200	nitrate transmembrane transporters
Potri.019G094100	216.596	42.8263	-2.33844	2.00099e-31	1.84382e-29	yes	Chr19:13112870-13114224	-	Chr19:13112870-13114224	-	09100 Metabolism	09101 Carbohydrate metabolism	ko00520 Amino sugar and nucleotide sugar metabolism	-	GO:0008061/chitin binding|GO:0004568/chitinase activity	GO:0016998/cell wall macromolecule catabolic process|GO:0006032/chitin catabolic process	PF00182 PF00187	PTHR22595 PTHR22595:SF37	EC:3.2.1.14
Potri.001G255100	0	167.976	9.38216	3.17626e-31	2.91794e-29	yes	Chr01:27119425-27121187	+	Chr01:27119425-27121187	+	-	-	-	-	GO:0004553/hydrolase activity, hydrolyzing O-glycosyl compounds	GO:0005975/carbohydrate metabolic process	PF00332|PF00332	PTHR32227 PTHR32227:SF96|PTHR32227 PTHR32227:SF96	EC:3.2.1.39|EC:3.2.1.39
Potri.014G162000	134.304	8.39077	-4.00056	3.85649e-31	3.53217e-29	yes	Chr14:11637789-11640076	+	Chr14:11637789-11640076	+	-	-	-	GO:0016021/integral component of membrane	-	-	PF03188 PF04526	PTHR23130 PTHR23130:SF80		AT5G35735	Auxin-responsive family protein
Potri.016G014500	2.24592	128.007	5.83278	4.00761e-31	3.65956e-29	yes	Chr16:770954-773390	+	Chr16:770954-773390	+	-	-	-	-	GO:0016758/transferase activity, transferring hexosyl groups	GO:0008152/metabolic process	PF00201	PTHR11926 PTHR11926:SF242
Potri.012G117100	185.307	29.6424	-2.64419	1.04373e-30	9.474e-29	yes	Chr12:13581967-13590612	-	Chr12:13581967-13590612	-	-	-	-	-	GO:0003924/GTPase activity|GO:0016817/hydrolase activity, acting on acid anhydrides|GO:0005525/GTP binding	-	PF05879|PF05879	PTHR11649 PTHR11649:SF65|PTHR11649 PTHR11649:SF65
Potri.002G012000	39.07	223.089	2.51348	1.27705e-30	1.15573e-28	yes	Chr02:743114-746555	-	Chr02:743114-746555	-	09180 Brite Hierarchies	09181 Protein families: metabolism|09182 Protein families: genetic information processing	ko01002 Peptidases and inhibitors|ko03110 Chaperones and folding catalysts	-	GO:0005524/ATP binding|GO:0004222/metalloendopeptidase activity|GO:0016887/ATPase activity	GO:0006508/proteolysis	PF00004 PF01434	PTHR23076 PTHR23076:SF33		AT5G42270	FtsH extracellular protease family
Potri.006G196900	141.507	424.017	1.58325	1.38716e-30	1.25165e-28	yes	Chr06:20483165-20484542	+	Chr06:20483165-20484542	+	-	-	-	-	GO:0005515/protein binding	-	PF00646 PF01344	PTHR24412 PTHR24412:SF230
Potri.017G150000	49.1739	245.771	2.32135	1.40342e-30	1.26258e-28	yes	Chr17:14851915-14853941	+	Chr17:14851915-14853941	+	-	-	-	-	GO:0016758/transferase activity, transferring hexosyl groups	GO:0008152/metabolic process	PF00201	PTHR11926 PTHR11926:SF343		AT3G16520	UDP-glucosyl transferase 88A1
Potri.010G029100	27.6185	195.109	2.82058	1.4879e-30	1.33463e-28	yes	Chr10:4177569-4182431	-	Chr10:4177569-4182431	-	09100 Metabolism|09130 Environmental Information Processing|09140 Cellular Processes|09150 Organismal Systems|09180 Brite Hierarchies	09101 Carbohydrate metabolism|09102 Energy metabolism|09105 Amino acid metabolism|09132 Signal transduction|09143 Cell growth and death|09156 Nervous system|09183 Protein families: signaling and cellular processes	ko00630 Glyoxylate and dicarboxylate metabolism|ko00910 Nitrogen metabolism|ko00250 Alanine, aspartate and glutamate metabolism|ko00220 Arginine biosynthesis|ko02020 Two-component system|ko04217 Necroptosis|ko04724 Glutamatergic synapse|ko04727 GABAergic synapse|ko04147 Exosome	-	GO:0004356/glutamate-ammonia ligase activity	GO:0006542/glutamine biosynthetic process|GO:0006807/nitrogen compound metabolic process	PF00120 PF03951|PF00120 PF03951	PTHR20852 PTHR20852:SF53|PTHR20852 PTHR20852:SF53	EC:6.3.1.2|EC:6.3.1.2	AT5G35630|AT5G35630	glutamine synthetase 2|glutamine synthetase 2
Potri.006G129900	156.147	17.5593	-3.15259	1.53958e-30	1.37692e-28	yes	Chr06:10582790-10584790	+	Chr06:10582790-10584790	+	09100 Metabolism	09110 Biosynthesis of other secondary metabolites	ko00940 Phenylpropanoid biosynthesis	-	GO:0020037/heme binding|GO:0004601/peroxidase activity	GO:0055114/oxidation-reduction process|GO:0006979/response to oxidative stress	PF00141	PTHR31235 PTHR31235:SF11	EC:1.11.1.7	AT2G37130	Peroxidase superfamily protein
Potri.005G068900	169.78	23.3879	-2.85983	2.05541e-30	1.83287e-28	yes	Chr05:4464654-4468529	-	Chr05:4464654-4468529	-	-	-	-	-	-	-	PF01490|PF01490|PF01490	PTHR22950 PTHR22950:SF310|PTHR22950 PTHR22950:SF310|PTHR22950 PTHR22950:SF310		AT5G63850|AT5G63850|AT5G63850	amino acid permease 4|amino acid permease 4|amino acid permease 4
Potri.015G000500	21.3819	177.615	3.05429	3.07567e-30	2.73465e-28	yes	Chr15:694-984	+	Chr15:694-984	+	-	-	-	-	-	-		PTHR34283 PTHR34283:SF1		AT3G49580	response to low sulfur 1
Potri.006G212200	117.282	2.80258	-5.38708	3.20687e-30	2.84299e-28	yes	Chr06:21893561-21894105	-	Chr06:21893561-21894105	-	-	-	-	-	GO:0004867/serine-type endopeptidase inhibitor activity	GO:0009611/response to wounding	PF00280	PTHR33091 PTHR33091:SF1		AT2G38870	Serine protease inhibitor, potato inhibitor I-type family protein
Potri.008G041000	0	134.891	7.72747	3.98073e-30	3.51878e-28	yes	Chr08:2308413-2310519	-	Chr08:2308413-2310519	-	09100 Metabolism|09180 Brite Hierarchies	09102 Energy metabolism|09181 Protein families: metabolism	ko00196 Photosynthesis - antenna proteins|ko00194 Photosynthesis proteins	GO:0016020/membrane	-	GO:0009765/photosynthesis, light harvesting	PF00504	PTHR21649 PTHR21649:SF7		AT3G54890	photosystem I light harvesting complex gene 1
Potri.011G122100	346.951	118.932	-1.5446	4.69358e-30	4.13688e-28	yes	Chr11:15269005-15270172	+	Chr11:15269005-15270172	+	-	-	-	-	-	-	PF12481	PTHR11772 PTHR11772:SF14		AT4G27450	Aluminium induced protein with YGL and LRDR motifs
Potri.013G154700	11.6028	148.818	3.681	6.35677e-30	5.57051e-28	yes	Chr13:15006118-15007978	+	Chr13:15006118-15007978	+	-	-	-	-	-	-	PF01357 PF03330	PTHR31867 PTHR31867:SF22		AT2G40610	expansin A8
Potri.007G006100	163.774	21.8159	-2.90825	7.71476e-30	6.74111e-28	yes	Chr07:421130-421989	-	Chr07:421130-421989	-	-	-	-	-	-	-		PTHR33526 PTHR33526:SF4
Potri.015G058600	14.4624	156.054	3.43166	1.20128e-29	1.04666e-27	yes	Chr15:8113497-8114552	+	Chr15:8113497-8114552	+	-	-	-	-	-	-	PF06549|PF06549	PTHR31425|PTHR31425		AT5G08050|AT5G08050	Protein of unknown function (DUF1118)|Protein of unknown function (DUF1118)
Potri.002G234000	138.998	12.2991	-3.49844	1.35356e-29	1.17597e-27	yes	Chr02:22701600-22704409	-	Chr02:22701600-22704409	-	-	-	-	-	GO:0016491/oxidoreductase activity	GO:0055114/oxidation-reduction process	PF00248	PTHR11732 PTHR11732:SF12	EC:1.1.1.317	AT1G60680	NAD(P)-linked oxidoreductase superfamily protein
Potri.019G042600	33.4755	204.863	2.61348	1.65461e-29	1.43343e-27	yes	Chr19:5885778-5888659	-	Chr19:5885778-5888659	-	-	-	-	-	-	-		PTHR17130		AT5G17170	rubredoxin family protein
Potri.001G253300	16.5559	160.94	3.28111	2.14648e-29	1.85427e-27	yes	Chr01:26949966-26955396	-	Chr01:26949966-26955396	-	09100 Metabolism|09140 Cellular Processes|09180 Brite Hierarchies	09101 Carbohydrate metabolism|09102 Energy metabolism|09105 Amino acid metabolism|09141 Transport and catabolism|09181 Protein families: metabolism	ko00630 Glyoxylate and dicarboxylate metabolism|ko00680 Methane metabolism|ko00250 Alanine, aspartate and glutamate metabolism|ko00260 Glycine, serine and threonine metabolism|ko04146 Peroxisome|ko01007 Amino acid related enzymes	-	-	GO:0008152/metabolic process	PF00266|PF00266	PTHR21152 PTHR21152:SF21|PTHR21152 PTHR21152:SF21	EC:2.6.1.44 EC:2.6.1.45 EC:2.6.1.51|EC:2.6.1.44 EC:2.6.1.45 EC:2.6.1.51	AT2G13360|AT2G13360	alanine:glyoxylate aminotransferase|alanine:glyoxylate aminotransferase
Potri.018G036700	1.05899	123.83	6.86952	2.19162e-29	1.88789e-27	yes	Chr18:2854518-2856495	-	Chr18:2854518-2856495	-	-	-	-	-	-	-	PF03181	PTHR31236 PTHR31236:SF2		AT5G25610	BURP domain-containing protein
Potri.007G111800	251.92	65.876	-1.93514	2.50191e-29	2.1491e-27	yes	Chr07:13319910-13320746	-	Chr07:13319910-13320746	-	-	-	-	-	GO:0004866/endopeptidase inhibitor activity	-	PF00197	PTHR33107 PTHR33107:SF4
Potri.019G031200	0	130.663	7.68879	2.52416e-29	2.16211e-27	yes	Chr19:4353538-4356383	+	Chr19:4353538-4356383	+	09100 Metabolism	09104 Nucleotide metabolism	ko00230 Purine metabolism|ko00240 Pyrimidine metabolism	-	GO:0016787/hydrolase activity	-	PF01150|PF01150|PF01150|PF01150	PTHR11782 PTHR11782:SF50|PTHR11782 PTHR11782:SF50|PTHR11782 PTHR11782:SF50|PTHR11782 PTHR11782:SF50	EC:3.6.1.5|EC:3.6.1.5|EC:3.6.1.5|EC:3.6.1.5
Potri.018G075000	224.734	51.964	-2.11264	3.9853e-29	3.40407e-27	yes	Chr18:9445440-9454217	-	Chr18:9445440-9454217	-	09100 Metabolism	09110 Biosynthesis of other secondary metabolites	ko00940 Phenylpropanoid biosynthesis	-	GO:0016491/oxidoreductase activity	GO:0055114/oxidation-reduction process	PF00171	PTHR11699 PTHR11699:SF182	EC:1.2.1.3	AT3G24503	aldehyde dehydrogenase 2C4
Potri.011G045000	2.55755	118.818	5.53785	6.35183e-29	5.41027e-27	yes	Chr11:3514999-3515427	+	Chr11:3514999-3515427	+	-	-	-	-	-	-		PTHR34789		AT4G21620	glycine-rich protein
Potri.008G200100	10.8689	142.224	3.70989	7.81879e-29	6.64116e-27	yes	Chr08:14181249-14186429	-	Chr08:14181249-14186429	-	09100 Metabolism|09130 Environmental Information Processing|09140 Cellular Processes|09150 Organismal Systems|09180 Brite Hierarchies	09101 Carbohydrate metabolism|09102 Energy metabolism|09105 Amino acid metabolism|09132 Signal transduction|09143 Cell growth and death|09156 Nervous system|09183 Protein families: signaling and cellular processes	ko00630 Glyoxylate and dicarboxylate metabolism|ko00910 Nitrogen metabolism|ko00250 Alanine, aspartate and glutamate metabolism|ko00220 Arginine biosynthesis|ko02020 Two-component system|ko04217 Necroptosis|ko04724 Glutamatergic synapse|ko04727 GABAergic synapse|ko04147 Exosome	-	GO:0004356/glutamate-ammonia ligase activity	GO:0006542/glutamine biosynthetic process|GO:0006807/nitrogen compound metabolic process	PF00120 PF03951|PF00120 PF03951|PF00120 PF03951|PF00120 PF03951	PTHR20852 PTHR20852:SF53|PTHR20852 PTHR20852:SF53|PTHR20852 PTHR20852:SF53|PTHR20852 PTHR20852:SF53	EC:6.3.1.2|EC:6.3.1.2|EC:6.3.1.2|EC:6.3.1.2	AT5G35630|AT5G35630|AT5G35630|AT5G35630	glutamine synthetase 2|glutamine synthetase 2|glutamine synthetase 2|glutamine synthetase 2
Potri.013G007000	0	131.629	7.97909	8.01514e-29	6.78898e-27	yes	Chr13:457441-457929	-	Chr13:457441-457929	-	-	-	-	-	-	-	PF04398	PTHR31676 PTHR31676:SF10		AT1G56580	Protein of unknown function, DUF538
Potri.003G139000	319.684	107.125	-1.57736	1.40798e-28	1.18928e-26	yes	Chr03:15548856-15550320	+	Chr03:15548856-15550320	+	-	-	-	-	-	-
Potri.017G100200	135.602	0	-8.73501	1.52095e-28	1.28114e-26	yes	Chr17:11189909-11192232	-	Chr17:11189909-11192232	-	09100 Metabolism	09101 Carbohydrate metabolism	ko00053 Ascorbate and aldarate metabolism|ko00562 Inositol phosphate metabolism	GO:0005737/cytoplasm	GO:0005506/iron ion binding	GO:0055114/oxidation-reduction process	PF05153	PTHR12588 PTHR12588:SF1	EC:1.13.99.1
Potri.013G000500	122.079	7.6932	-3.98809	2.07443e-28	1.74252e-26	yes	Chr13:38841-40147	-	Chr13:38841-40147	-	-	-	-	-	GO:0045735/nutrient reservoir activity	-	PF07883	PTHR31238 PTHR31238:SF39		AT1G09560	germin-like protein 5
Potri.015G034700	296.867	94.2101	-1.65586	2.45556e-28	2.05699e-26	yes	Chr15:2863963-2867033	+	Chr15:2863963-2867033	+	09100 Metabolism|09130 Environmental Information Processing|09140 Cellular Processes|09150 Organismal Systems|09180 Brite Hierarchies	09101 Carbohydrate metabolism|09102 Energy metabolism|09105 Amino acid metabolism|09132 Signal transduction|09143 Cell growth and death|09156 Nervous system|09183 Protein families: signaling and cellular processes	ko00630 Glyoxylate and dicarboxylate metabolism|ko00910 Nitrogen metabolism|ko00250 Alanine, aspartate and glutamate metabolism|ko00220 Arginine biosynthesis|ko02020 Two-component system|ko04217 Necroptosis|ko04724 Glutamatergic synapse|ko04727 GABAergic synapse|ko04147 Exosome	-	GO:0004356/glutamate-ammonia ligase activity	GO:0006542/glutamine biosynthetic process|GO:0006807/nitrogen compound metabolic process	PF00120 PF03951	PTHR20852 PTHR20852:SF59	EC:6.3.1.2	AT1G66200	glutamine synthase clone F11
Potri.007G037300	226.94	55.0507	-2.04348	2.61542e-28	2.18488e-26	yes	Chr07:2991555-2993001	+	Chr07:2991555-2993001	+	-	-	-	-	-	-	PF12697	PTHR10992 PTHR10992:SF820		AT2G23610	methyl esterase 3
Potri.005G106400	134.122	396.181	1.56262	3.90692e-28	3.25484e-26	yes	Chr05:7676671-7679253	-	Chr05:7676671-7679253	-	-	-	-	-	-	-	PF00581	PTHR12231	EC:2.8.1.1	AT4G35770	Rhodanese/Cell cycle control phosphatase superfamily protein
Potri.006G089800	125.248	0	-8.19877	4.88567e-28	4.05911e-26	yes	Chr06:6851107-6853809	+	Chr06:6851107-6853809	+	09100 Metabolism	09110 Biosynthesis of other secondary metabolites	ko00960 Tropane, piperidine and pyridine alkaloid biosynthesis	-	GO:0016491/oxidoreductase activity	GO:0008152/metabolic process	PF08659	PTHR24322 PTHR24322:SF410	EC:1.1.1.206
Potri.017G064100	124.434	9.24104	-3.75119	6.46372e-28	5.35556e-26	yes	Chr17:5474581-5477026	+	Chr17:5474581-5477026	+	09100 Metabolism	09110 Biosynthesis of other secondary metabolites	ko00940 Phenylpropanoid biosynthesis	-	GO:0020037/heme binding|GO:0004601/peroxidase activity	GO:0055114/oxidation-reduction process|GO:0006979/response to oxidative stress	PF00141	PTHR31517 PTHR31517:SF7	EC:1.11.1.7	AT5G14130	Peroxidase superfamily protein
Potri.019G058000	58.2257	251.941	2.11336	7.17915e-28	5.93216e-26	yes	Chr19:9745841-9747239	-	Chr19:9745841-9747239	-	-	-	-	-	-	-		PTHR35127		AT3G56360
Potri.005G058400	25.6205	178.368	2.79949	7.3575e-28	6.06306e-26	yes	Chr05:3698624-3699953	+	Chr05:3698624-3699953	+	09150 Organismal Systems|09160 Human Diseases|09180 Brite Hierarchies	09151 Immune system|09166 Cardiovascular disease|09182 Protein families: genetic information processing	ko04621 NOD-like receptor signaling pathway|ko05418 Fluid shear stress and atherosclerosis|ko03110 Chaperones and folding catalysts	-	GO:0015035/protein disulfide oxidoreductase activity|GO:0009055/electron transfer activity	GO:0006662/glycerol ether metabolic process|GO:0045454/cell redox homeostasis	PF14595	PTHR10438 PTHR10438:SF290	EC:1.8.1.8
Potri.008G061800	495.194	225.67	-1.13378	8.31359e-28	6.83242e-26	yes	Chr08:3700887-3701654	-	Chr08:3700887-3701654	-	-	-	-	-	-	-	PF14368	PTHR33122 PTHR33122:SF6		AT5G05960	Bifunctional inhibitor/lipid-transfer protein/seed storage 2S albumin superfamily protein
Potri.004G188200	205.866	45.3473	-2.18262	8.3424e-28	6.83762e-26	yes	Chr04:20104474-20104932	+	Chr04:20104474-20104932	+	-	-	-	GO:0005576/extracellular region	GO:0008083/growth factor activity	GO:0008283/cell proliferation	PF06404	PTHR33285 PTHR33285:SF2		AT3G44735	PHYTOSULFOKINE 3 PRECURSOR
Potri.012G105300	13.5264	145.454	3.42672	1.03063e-27	8.42454e-26	yes	Chr12:12721350-12722878	+	Chr12:12721350-12722878	+	-	-	-	-	GO:0048037/cofactor binding	-	PF00550	PTHR20863 PTHR20863:SF28		AT4G25050	acyl carrier protein 4
Potri.001G105900	48.7517	231.032	2.24457	1.07821e-27	8.78984e-26	yes	Chr01:8510988-8514249	+	Chr01:8510988-8514249	+	-	-	-	-	GO:0003824/catalytic activity	GO:0008152/metabolic process	PF00501 PF13193	PTHR24095 PTHR24095:SF171	EC:6.2.1.8
Potri.012G108500	126.651	10.4347	-3.6014	1.1855e-27	9.6387e-26	yes	Chr12:12958155-12960443	+	Chr12:12958155-12960443	+	-	-	-	-	GO:0003700/DNA binding transcription factor activity	GO:0006355/regulation of transcription, DNA-templated	PF00847	PTHR31190		AT5G07310	Integrase-type DNA-binding superfamily protein
Potri.013G138490	17.513	156.177	3.15668	1.29476e-27	1.0499e-25	yes	Chr13:15636226-15636471	-	Chr13:15636226-15636471	-	09100 Metabolism|09180 Brite Hierarchies	09102 Energy metabolism|09181 Protein families: metabolism	ko00190 Oxidative phosphorylation|ko00195 Photosynthesis|ko00194 Photosynthesis proteins	-	-	-	PF00137	PTHR10031	EC:3.6.3.14	ATCG00140	ATP synthase subunit C family protein
Potri.001G191000	42.513	215.971	2.34486	2.12539e-27	1.71885e-25	yes	Chr01:17438545-17440839	-	Chr01:17438545-17440839	-	-	-	-	-	GO:0003993/acid phosphatase activity	-	PF03767	PTHR31284 PTHR31284:SF5	EC:3.1.3.2
Potri.006G188400	131.539	12.7398	-3.36807	2.4239e-27	1.95506e-25	yes	Chr06:19547914-19549625	+	Chr06:19547914-19549625	+	09100 Metabolism	09101 Carbohydrate metabolism	ko00520 Amino sugar and nucleotide sugar metabolism	-	GO:0004553/hydrolase activity, hydrolyzing O-glycosyl compounds	GO:0005975/carbohydrate metabolic process	PF00704	PTHR11177 PTHR11177:SF219		AT4G19820	Glycosyl hydrolase family protein with chitinase insertion domain
Potri.006G177700	260.804	76.1951	-1.77519	2.47548e-27	1.99138e-25	yes	Chr06:18381682-18384275	+	Chr06:18381682-18384275	+	-	-	-	GO:0016020/membrane	-	-	PF00892|PF00892	PTHR31218 PTHR31218:SF30|PTHR31218 PTHR31218:SF30		AT4G30420|AT4G30420	nodulin MtN21 /EamA-like transporter family protein|nodulin MtN21 /EamA-like transporter family protein
Potri.008G073400	138.765	15.7706	-3.13733	3.22711e-27	2.58918e-25	yes	Chr08:4546376-4547327	-	Chr08:4546376-4547327	-	09130 Environmental Information Processing	09132 Signal transduction	ko04016 MAPK signaling pathway - plant|ko04075 Plant hormone signal transduction	-	-	GO:0009607/response to biotic stimulus|GO:0006952/defense response	PF10604	PTHR31213 PTHR31213:SF3		AT2G38310	PYR1-like 4
Potri.016G125000	253.419	72.383	-1.8078	3.38031e-27	2.70496e-25	yes	Chr16:12865921-12867521	-	Chr16:12865921-12867521	-	09100 Metabolism	09110 Biosynthesis of other secondary metabolites	ko00940 Phenylpropanoid biosynthesis	-	GO:0020037/heme binding|GO:0004601/peroxidase activity	GO:0055114/oxidation-reduction process|GO:0006979/response to oxidative stress	PF00141	PTHR31235 PTHR31235:SF27	EC:1.11.1.7	AT5G39580	Peroxidase superfamily protein
Potri.019G079500	301.012	100.527	-1.58224	4.12706e-27	3.29385e-25	yes	Chr19:12014838-12017859	-	Chr19:12014838-12017859	-	-	-	-	-	-	-	PF00650 PF03765	PTHR23324 PTHR23324:SF67		AT1G22530	PATELLIN 2
Potri.007G050300	105.032	2.91014	-5.1736	4.28504e-27	3.41098e-25	yes	Chr07:4840195-4842858	+	Chr07:4840195-4842858	+	09130 Environmental Information Processing	09132 Signal transduction	ko04075 Plant hormone signal transduction	-	-	-	PF03321	PTHR31901 PTHR31901:SF7
Potri.006G137800	2.53933	111.021	5.45024	4.40707e-27	3.49896e-25	yes	Chr06:11443261-11444098	+	Chr06:11443261-11444098	+	-	-	-	-	GO:0004857/enzyme inhibitor activity|GO:0030599/pectinesterase activity	-	PF04043	PTHR31080 PTHR31080:SF26	EC:3.1.1.11	AT5G20740	Plant invertase/pectin methylesterase inhibitor superfamily protein
Potri.016G027600	9.41712	130.689	3.79471	4.70719e-27	3.72751e-25	yes	Chr16:1540526-1541450	+	Chr16:1540526-1541450	+	09180 Brite Hierarchies	09182 Protein families: genetic information processing	ko03011 Ribosome	-	-	-		PTHR34678		AT3G56910	plastid-specific 50S ribosomal protein 5
Potri.007G023800	9.26976	130.128	3.81126	5.03147e-27	3.97395e-25	yes	Chr07:1832180-1833664	+	Chr07:1832180-1833664	+	-	-	-	-	GO:0003677/DNA binding	-	PF00249	PTHR24078 PTHR24078:SF177
Potri.014G095100	1.08591	112.25	6.69166	5.23788e-27	4.12626e-25	yes	Chr14:6172512-6172751	-	Chr14:6172512-6172751	-	-	-	-	-	-	-		PTHR33513 PTHR33513:SF4
Potri.012G042800	191.735	0	-11.4671	5.87288e-27	4.61453e-25	yes	Chr12:3824833-3826525	-	Chr12:3824833-3826525	-	09100 Metabolism	09110 Biosynthesis of other secondary metabolites	ko00940 Phenylpropanoid biosynthesis	-	GO:0020037/heme binding|GO:0004601/peroxidase activity	GO:0055114/oxidation-reduction process|GO:0006979/response to oxidative stress	PF00141	PTHR31235	EC:1.11.1.7
Potri.008G049000	6.5701	121.474	4.20858	6.31022e-27	4.94539e-25	yes	Chr08:2864262-2867032	+	Chr08:2864262-2867032	+	09100 Metabolism|09150 Organismal Systems|09180 Brite Hierarchies	09103 Lipid metabolism|09152 Endocrine system|09156 Nervous system|09159 Environmental adaptation|09181 Protein families: metabolism	ko00561 Glycerolipid metabolism|ko04923 Regulation of lipolysis in adipocytes|ko04723 Retrograde endocannabinoid signaling|ko04714 Thermogenesis|ko01002 Peptidases and inhibitors	-	-	-	PF12695|PF12695	PTHR11614 PTHR11614:SF92|PTHR11614 PTHR11614:SF92	EC:2.3.1.22|EC:2.3.1.22	AT2G39400|AT2G39400	alpha/beta-Hydrolases superfamily protein|alpha/beta-Hydrolases superfamily protein
Potri.010G130800	10.5964	133.36	3.65368	7.68406e-27	6.00661e-25	yes	Chr10:14718368-14726056	-	Chr10:14718368-14726056	-	-	-	-	-	-	-		PTHR31342 PTHR31342:SF7|PTHR31342 PTHR31342:SF7|PTHR31342 PTHR31342:SF7|PTHR31342 PTHR31342:SF7|PTHR31342 PTHR31342:SF7		AT3G25690|AT3G25690|AT3G25690|AT3G25690|AT3G25690	Hydroxyproline-rich glycoprotein family protein|Hydroxyproline-rich glycoprotein family protein|Hydroxyproline-rich glycoprotein family protein|Hydroxyproline-rich glycoprotein family protein|Hydroxyproline-rich glycoprotein family protein
Potri.006G254300	124.048	10.8415	-3.51626	1.10452e-26	8.61189e-25	yes	Chr06:25211334-25212724	+	Chr06:25211334-25212724	+	-	-	-	-	-	-		PTHR26312 PTHR26312:SF73		AT4G32340	Tetratricopeptide repeat (TPR)-like superfamily protein
Potri.017G140900	105.07	3.77643	-4.79818	1.195e-26	9.29346e-25	yes	Chr17:14148206-14150636	+	Chr17:14148206-14150636	+	09100 Metabolism|09150 Organismal Systems|09160 Human Diseases|09180 Brite Hierarchies	09106 Metabolism of other amino acids|09111 Xenobiotics biodegradation and metabolism|09149 Aging|09161 Cancer: overview|09162 Cancer: specific types|09166 Cardiovascular disease|09176 Drug resistance: antineoplastic|09183 Protein families: signaling and cellular processes	ko00480 Glutathione metabolism|ko00980 Metabolism of xenobiotics by cytochrome P450|ko00982 Drug metabolism - cytochrome P450|ko00983 Drug metabolism - other enzymes|ko04212 Longevity regulating pathway - worm|ko05200 Pathways in cancer|ko05204 Chemical carcinogenesis|ko05225 Hepatocellular carcinoma|ko05418 Fluid shear stress and atherosclerosis|ko01524 Platinum drug resistance|ko02000 Transport…	-	-	-	PF01124	PTHR10250 PTHR10250:SF16	EC:2.5.1.18	AT1G65820	microsomal glutathione s-transferase, putative
Potri.004G163300	129.061	378.006	1.55036	1.31544e-26	1.0204e-24	yes	Chr04:18284034-18287180	-	Chr04:18284034-18287180	-	09100 Metabolism	09105 Amino acid metabolism	ko00330 Arginine and proline metabolism	-	GO:0003824/catalytic activity	GO:0008295/spermidine biosynthetic process	PF00278 PF02784	PTHR11482 PTHR11482:SF36	EC:4.1.1.19	AT2G16500	arginine decarboxylase 1
Potri.004G002700	232.133	62.3351	-1.89683	1.5931e-26	1.23264e-24	yes	Chr04:171799-176648	+	Chr04:171799-176648	+	09120 Genetic Information Processing|09140 Cellular Processes|09150 Organismal Systems|09180 Brite Hierarchies	09123 Folding, sorting and degradation|09143 Cell growth and death|09159 Environmental adaptation|09182 Protein families: genetic information processing	ko04120 Ubiquitin mediated proteolysis|ko04115 p53 signaling pathway|ko04712 Circadian rhythm - plant|ko04121 Ubiquitin system	-	GO:0005515/protein binding	-	PF00400 PF13923|PF00400	PTHR22847 PTHR22847:SF451|PTHR22847 PTHR22847:SF422
Potri.006G139600	10.9157	132.65	3.60315	1.96901e-26	1.51963e-24	yes	Chr06:11682887-11684470	+	Chr06:11682887-11684470	+	09100 Metabolism|09180 Brite Hierarchies	09102 Energy metabolism|09181 Protein families: metabolism	ko00196 Photosynthesis - antenna proteins|ko00194 Photosynthesis proteins	GO:0016020/membrane	-	GO:0009765/photosynthesis, light harvesting	PF00504	PTHR21649 PTHR21649:SF5		AT1G19150	photosystem I light harvesting complex gene 6
Potri.001G455400	151.663	22.6104	-2.74581	2.37375e-26	1.82737e-24	yes	Chr01:48179677-48181447	+	Chr01:48179677-48181447	+	-	-	-	-	GO:0016706/oxidoreductase activity, acting on paired donors, with incorporation or reduction of molecular oxygen, 2-oxoglutarate as one donor, and incorporation of one atom each of oxygen into both donors|GO:0016491/oxidoreductase activity	GO:0055114/oxidation-reduction process	PF03171 PF14226	PTHR10209 PTHR10209:SF108		AT1G14120	2-oxoglutarate (2OG) and Fe(II)-dependent oxygenase superfamily protein
Potri.010G248700	12.078	135.135	3.48394	3.29622e-26	2.5311e-24	yes	Chr10:22265254-22268863	-	Chr10:22265254-22268863	-	-	-	-	-	-	-		PTHR31096 PTHR31096:SF16		AT1G16880	uridylyltransferase-related
Potri.019G064700	105.595	4.6871	-4.4937	3.38315e-26	2.59131e-24	yes	Chr19:10468399-10469946	-	Chr19:10468399-10469946	-	-	-	-	-	GO:0004190/aspartic-type endopeptidase activity	GO:0006508/proteolysis	PF14541 PF14543	PTHR13683 PTHR13683:SF268	EC:3.4.23.12
Potri.004G072900	3.36689	108.287	5.0073	5.41206e-26	4.13493e-24	yes	Chr04:6092560-6093431	+	Chr04:6092560-6093431	+	-	-	-	-	-	-	PF11947	PTHR34575 PTHR34575:SF1		AT5G52780	Protein of unknown function (DUF3464)
Potri.016G057400	144.075	399.99	1.47314	5.42995e-26	4.13819e-24	yes	Chr16:3894604-3896131	-	Chr16:3894604-3896131	-	-	-	-	-	GO:0004553/hydrolase activity, hydrolyzing O-glycosyl compounds	GO:0005975/carbohydrate metabolic process	PF00332	PTHR32227 PTHR32227:SF49	EC:3.2.1.39	AT3G57270	beta-1,3-glucanase 1
Potri.006G137500	5.50684	114.057	4.37238	6.86554e-26	5.21918e-24	yes	Chr06:11392185-11394304	+	Chr06:11392185-11394304	+	09190 Not Included in Pathway or Brite	09191 Unclassified: metabolism	ko99980 Enzymes with EC numbers	-	GO:0016209/antioxidant activity|GO:0016491/oxidoreductase activity	GO:0055114/oxidation-reduction process	PF08534	PTHR10681	EC:1.11.1.15	AT3G26060	Thioredoxin superfamily protein
Potri.010G075501	108.611	6.33275	-4.1002	7.92429e-26	6.00903e-24	yes	Chr10:10335452-10343807	+	Chr10:10335452-10343807	+	-	-	-	-	-	-	PF00280|PF00280	PTHR33091 PTHR33091:SF14|PTHR33091 PTHR33091:SF14		AT2G38870|AT2G38870	Serine protease inhibitor, potato inhibitor I-type family protein|Serine protease inhibitor, potato inhibitor I-type family protein
Potri.009G119900	101.316	3.5467	-4.83624	8.21301e-26	6.21246e-24	yes	Chr09:10065052-10066492	+	Chr09:10065052-10066492	+	-	-	-	-	-	-		PTHR35290 PTHR35290:SF2		AT4G34600
Potri.015G120200	13.5008	137.549	3.34883	8.36382e-26	6.31084e-24	yes	Chr15:13448611-13449746	+	Chr15:13448611-13449746	+	-	-	-	-	-	-	PF14299	PTHR32278 PTHR32278:SF8		AT1G31200	phloem protein 2-A9
Potri.009G107500	101.567	0	-6.70084	8.79882e-26	6.62264e-24	yes	Chr09:9338490-9340128	-	Chr09:9338490-9340128	-	-	-	-	GO:0031227/intrinsic component of endoplasmic reticulum membrane	GO:0016788/hydrolase activity, acting on ester bonds	GO:0006886/intracellular protein transport|GO:0006505/GPI anchor metabolic process	PF12697	PTHR10992 PTHR10992:SF784		AT3G50440	methyl esterase 10
Potri.014G122000	0	112.792	7.58368	9.57275e-26	7.18736e-24	yes	Chr14:8205942-8206725	+	Chr14:8205942-8206725	+	-	-	-	-	-	GO:0006950/response to stress	PF00582	PTHR31964 PTHR31964:SF52		AT3G62550	Adenine nucleotide alpha hydrolases-like superfamily protein
Potri.008G114000	46.9122	216.55	2.20667	1.59892e-25	1.19754e-23	yes	Chr08:7254920-7255447	-	Chr08:7254920-7255447	-	-	-	-	-	-	-		PTHR35831 PTHR35831:SF1
Potri.016G090700	35.9838	192.497	2.41942	1.63062e-25	1.21828e-23	yes	Chr16:7416641-7419060	-	Chr16:7416641-7419060	-	09160 Human Diseases|09180 Brite Hierarchies	09171 Infectious disease: bacterial|09182 Protein families: genetic information processing	ko05130 Pathogenic Escherichia coli infection|ko03009 Ribosome biogenesis|ko03036 Chromosome and associated proteins	-	GO:0003676/nucleic acid binding	-	PF00076|PF00076	PTHR24012|PTHR24012		AT3G53460|AT3G53460	chloroplast RNA-binding protein 29|chloroplast RNA-binding protein 29
Potri.001G144800	2.65499	103.771	5.28855	2.68049e-25	1.99776e-23	yes	Chr01:11938817-11940570	+	Chr01:11938817-11940570	+	09100 Metabolism	09101 Carbohydrate metabolism|09105 Amino acid metabolism	ko00630 Glyoxylate and dicarboxylate metabolism|ko00260 Glycine, serine and threonine metabolism	GO:0005960/glycine cleavage complex	-	GO:0006546/glycine catabolic process	PF01597	PTHR11715 PTHR11715:SF1		AT2G35370	glycine decarboxylase complex H
Potri.019G117900	19.8085	152.388	2.94355	2.84935e-25	2.11841e-23	yes	Chr19:14404024-14407785	+	Chr19:14404024-14407785	+	-	-	-	GO:0009523/photosystem II	-	GO:0015979/photosynthesis	PF11264	PTHR34793 PTHR34793:SF1		AT2G20890	photosystem II reaction center PSB29 protein
Potri.004G048900	49.0712	219.47	2.16107	3.48336e-25	2.58346e-23	yes	Chr04:3937503-3941326	-	Chr04:3937503-3941326	-	09180 Brite Hierarchies	09183 Protein families: signaling and cellular processes	ko02000 Transporters	GO:0016020/membrane	-	-	PF03151|PF03151|PF03151	PTHR11132 PTHR11132:SF102|PTHR11132 PTHR11132:SF102|PTHR11132 PTHR11132:SF102
Potri.009G064300	14.5629	137.768	3.24188	3.88443e-25	2.87391e-23	yes	Chr09:6522498-6524049	-	Chr09:6522498-6524049	-	-	-	-	-	GO:0005515/protein binding	-	PF00560 PF08263 PF13855	PTHR27000 PTHR27000:SF151	EC:3.2.1.15	AT3G12610	Leucine-rich repeat (LRR) family protein
Potri.004G060900	154.514	26.254	-2.55713	4.70689e-25	3.47396e-23	yes	Chr04:5075733-5077301	+	Chr04:5075733-5077301	+	-	-	-	-	GO:0043565/sequence-specific DNA binding|GO:0003700/DNA binding transcription factor activity	GO:0006355/regulation of transcription, DNA-templated	PF03106	PTHR31282 PTHR31282:SF9		AT1G29280	WRKY DNA-binding protein 65
Potri.013G045500	111.691	8.73355	-3.6768	6.528e-25	4.80638e-23	yes	Chr13:3202915-3203311	-	Chr13:3202915-3203311	-	-	-	-	-	-	-
Potri.006G142600	0	145.551	10.0859	6.93587e-25	5.09435e-23	yes	Chr06:12023385-12024248	-	Chr06:12023385-12024248	-	-	-	-	-	GO:0045735/nutrient reservoir activity	-	PF07883|PF00190	PTHR31238 PTHR31238:SF21|PTHR31238 PTHR31238:SF21		AT5G20630|AT5G20630	germin 3|germin 3
Potri.002G213100	136.045	18.5352	-2.87575	8.07233e-25	5.91478e-23	yes	Chr02:19583302-19585974	-	Chr02:19583302-19585974	-	09130 Environmental Information Processing	09132 Signal transduction	ko04075 Plant hormone signal transduction	-	GO:0016787/hydrolase activity	GO:0008152/metabolic process	PF12695	PTHR23024 PTHR23024:SF98	EC:3.1.1.1	AT3G63010	alpha/beta-Hydrolases superfamily protein
Potri.017G153466	108.847	0	-8.11461	8.78825e-25	6.42387e-23	yes	Chr17:15083613-15084439	-	Chr17:15083613-15084439	-	-	-	-	-	-	-	PF00197	PTHR33107 PTHR33107:SF2		AT1G17860	Kunitz family trypsin and protease inhibitor protein
Potri.006G221100	18.07	145.705	3.01139	9.04464e-25	6.59543e-23	yes	Chr06:22649679-22651665	-	Chr06:22649679-22651665	-	09120 Genetic Information Processing|09180 Brite Hierarchies	09122 Translation|09182 Protein families: genetic information processing	ko03010 Ribosome|ko03011 Ribosome	GO:0005840/ribosome	GO:0003735/structural constituent of ribosome	GO:0006412/translation	PF00573	PTHR10746 PTHR10746:SF10		AT1G07320	ribosomal protein L4
Potri.003G015200	29.8802	174.538	2.54628	1.1447e-24	8.32731e-23	yes	Chr03:1689291-1690438	-	Chr03:1689291-1690438	-	09100 Metabolism|09180 Brite Hierarchies	09102 Energy metabolism|09181 Protein families: metabolism	ko00195 Photosynthesis|ko00194 Photosynthesis proteins	-	GO:0009055/electron transfer activity|GO:0051536/iron-sulfur cluster binding	-	PF00111	PTHR19370 PTHR19370:SF120		AT1G10960	ferredoxin 1
Potri.012G090200	34.055	183.88	2.43282	1.3363e-24	9.69792e-23	yes	Chr12:11533701-11537125	+	Chr12:11533701-11537125	+	09160 Human Diseases|09180 Brite Hierarchies	09171 Infectious disease: bacterial|09182 Protein families: genetic information processing	ko05130 Pathogenic Escherichia coli infection|ko03009 Ribosome biogenesis|ko03036 Chromosome and associated proteins	-	GO:0003676/nucleic acid binding	-	PF00076	PTHR24012		AT4G24770	31-kDa RNA binding protein
Potri.004G140500	48.5541	214.719	2.14479	1.92185e-24	1.39142e-22	yes	Chr04:16290983-16293055	-	Chr04:16290983-16293055	-	09120 Genetic Information Processing|09180 Brite Hierarchies	09122 Translation|09182 Protein families: genetic information processing	ko03010 Ribosome|ko03011 Ribosome	GO:0005840/ribosome|GO:0005622/intracellular	GO:0003735/structural constituent of ribosome	GO:0006412/translation	PF00177	PTHR11205 PTHR11205:SF22
Potri.006G275900	0	128.707	9.41708	3.31228e-24	2.3924e-22	yes	Chr06:26745905-26747488	+	Chr06:26745905-26747488	+	09180 Brite Hierarchies	09182 Protein families: genetic information processing	ko03000 Transcription factors	-	GO:0003677/DNA binding	-	PF00249	PTHR10641 PTHR10641:SF564
Potri.018G008500	196.885	49.5322	-1.99091	4.72249e-24	3.40288e-22	yes	Chr18:613977-616562	-	Chr18:613977-616562	-	-	-	-	-	GO:0043565/sequence-specific DNA binding|GO:0003700/DNA binding transcription factor activity	GO:0006355/regulation of transcription, DNA-templated	PF03106 PF10533	PTHR31282 PTHR31282:SF15		AT2G24570	WRKY DNA-binding protein 17
Potri.014G153000	30.3022	172.703	2.5108	4.78165e-24	3.43736e-22	yes	Chr14:10751236-10754337	+	Chr14:10751236-10754337	+	09120 Genetic Information Processing|09180 Brite Hierarchies	09122 Translation|09182 Protein families: genetic information processing	ko03010 Ribosome|ko03011 Ribosome	GO:0005840/ribosome	GO:0019843/rRNA binding|GO:0003735/structural constituent of ribosome	GO:0006412/translation	PF00347	PTHR11655 PTHR11655:SF14		AT1G05190	Ribosomal protein L6 family
Potri.005G188400	140.394	21.8037	-2.68683	5.0441e-24	3.61748e-22	yes	Chr05:19605890-19607282	+	Chr05:19605890-19607282	+	-	-	-	-	-	-		PTHR31723 PTHR31723:SF1
Potri.015G071500	11.3002	123.948	3.45532	5.12745e-24	3.6686e-22	yes	Chr15:9716991-9717969	+	Chr15:9716991-9717969	+	-	-	-	-	-	-	PF02704	PTHR23201 PTHR23201:SF18
Potri.001G448000	92.5639	1.13361	-6.35146	5.55176e-24	3.96286e-22	yes	Chr01:47347048-47350618	+	Chr01:47347048-47350618	+	09190 Not Included in Pathway or Brite	09191 Unclassified: metabolism	ko99980 Enzymes with EC numbers	-	GO:0016747/transferase activity, transferring acyl groups other than amino-acyl groups	-	PF02458|PF02458	PTHR31642 PTHR31642:SF9|PTHR31642 PTHR31642:SF9	EC:2.3.1.196|EC:2.3.1.196
Potri.002G033300	34.7838	182.383	2.39049	6.34862e-24	4.52105e-22	yes	Chr02:2208563-2209060	-	Chr02:2208563-2209060	-	09120 Genetic Information Processing|09180 Brite Hierarchies	09122 Translation|09182 Protein families: genetic information processing	ko03010 Ribosome|ko03011 Ribosome	GO:0005840/ribosome|GO:0005622/intracellular	GO:0003735/structural constituent of ribosome	GO:0006412/translation	PF01197	PTHR33280 PTHR33280:SF1		AT1G75350	Ribosomal protein L31
Potri.015G042800	326.665	127.9	-1.35279	6.71126e-24	4.76813e-22	yes	Chr15:3981017-3988413	-	Chr15:3981017-3988413	-	-	-	-	-	-	-	PF07173|PF07173|PF07173|PF07173|PF07173|PF07173|PF07173	PTHR34365 PTHR34365:SF2|PTHR34365 PTHR34365:SF2|PTHR34365 PTHR34365:SF2|PTHR34365 PTHR34365:SF2|PTHR34365 PTHR34365:SF2|PTHR34365 PTHR34365:SF2|PTHR34365 PTHR34365:SF2		AT2G22660|AT2G22660|AT2G22660|AT2G22660|AT2G22660|AT2G22660|AT2G22660	Protein of unknown function (duplicated DUF1399)|Protein of unknown function (duplicated DUF1399)|Protein of unknown function (duplicated DUF1399)|Protein of unknown function (duplicated DUF1399)|Protein of unknown function (duplicated DUF1399)|Protein of unknown function (duplicated DUF1399)|Protein of unknown function (duplicated DUF1399)
Potri.008G212500	348.933	143.353	-1.28337	1.05812e-23	7.50009e-22	yes	Chr08:17440447-17456268	+	Chr08:17440447-17456268	+	-	-	-	-	-	GO:0009607/response to biotic stimulus|GO:0006952/defense response	PF00407|PF00407	PTHR31213 PTHR31213:SF11|PTHR31213 PTHR31213:SF11
Potri.001G204300	9.33734	116.698	3.64362	1.21091e-23	8.56307e-22	yes	Chr01:20691176-20695768	-	Chr01:20691176-20695768	-	-	-	-	-	-	-		PTHR32429 PTHR32429:SF9		AT3G15840	post-illumination chlorophyll fluorescence increase
Potri.006G090100	92.465	0	-6.86532	2.03529e-23	1.43595e-21	yes	Chr06:6880002-6880304	+	Chr06:6880002-6880304	+	-	-	-	-	-	-		PTHR34670 PTHR34670:SF3		AT2G37750	(1 of 2) PTHR34670:SF3 - EXPRESSED PROTEIN
Potri.005G209500	2.96838	95.683	5.01051	3.67874e-23	2.58942e-21	yes	Chr05:21373212-21376005	+	Chr05:21373212-21376005	+	-	-	-	-	GO:0050662/coenzyme binding|GO:0003824/catalytic activity	GO:0044237/cellular metabolic process	PF01370	PTHR10366 PTHR10366:SF278		AT3G63140	chloroplast stem-loop binding protein of 41 kDa
Potri.006G144100	33.7607	176.391	2.38536	3.92042e-23	2.75317e-21	yes	Chr06:12186275-12191383	-	Chr06:12186275-12191383	-	-	-	-	GO:0016020/membrane	-	GO:0055085/transmembrane transport	PF00924	PTHR31618 PTHR31618:SF7
Potri.007G044300	11.0938	119.573	3.43007	4.32707e-23	3.03174e-21	yes	Chr07:3840043-3847361	-	Chr07:3840043-3847361	-	09100 Metabolism	09109 Metabolism of terpenoids and polyketides	ko00906 Carotenoid biosynthesis	-	GO:0004497/monooxygenase activity	GO:0055114/oxidation-reduction process	PF00498 PF01494	PTHR13789 PTHR13789:SF245	EC:1.14.13.90	AT5G67030	zeaxanthin epoxidase (ZEP) (ABA1)
Potri.010G180400	8.94264	113.272	3.66294	4.37952e-23	3.06143e-21	yes	Chr10:17930234-17934074	+	Chr10:17930234-17934074	+	09100 Metabolism|09180 Brite Hierarchies	09101 Carbohydrate metabolism|09181 Protein families: metabolism	ko00630 Glyoxylate and dicarboxylate metabolism|ko01009 Protein phosphatases and associated proteins	-	-	-	PF13242	PTHR19288 PTHR19288:SF33	EC:3.1.3.18	AT5G36790	Haloacid dehalogenase-like hydrolase (HAD) superfamily protein
Potri.004G127400	259.958	88.772	-1.5501	4.95231e-23	3.45389e-21	yes	Chr04:14138436-14141676	+	Chr04:14138436-14141676	+	-	-	-	-	-	-		PTHR33971 PTHR33971:SF1		AT5G39570	(1 of 2) PTHR33971:SF1 - GENOMIC DNA, CHROMOSOME 3, P1 CLONE:MRI12
Potri.008G165200	138.409	22.7732	-2.60353	5.23121e-23	3.64006e-21	yes	Chr08:11390649-11393029	+	Chr08:11390649-11393029	+	-	-	-	-	-	-	PF05514	PTHR31474		AT4G14420	HR-like lesion-inducing protein-related
Potri.003G121600	11.1369	119.352	3.4218	5.25447e-23	3.6479e-21	yes	Chr03:14261667-14264867	-	Chr03:14261667-14264867	-	09150 Organismal Systems|09180 Brite Hierarchies	09159 Environmental adaptation|09182 Protein families: genetic information processing|09183 Protein families: signaling and cellular processes	ko04626 Plant-pathogen interaction|ko03012 Translation factors|ko03029 Mitochondrial biogenesis|ko04147 Exosome	GO:0005622/intracellular	GO:0003746/translation elongation factor activity|GO:0003924/GTPase activity|GO:0005525/GTP binding	GO:0006414/translational elongation	PF00009 PF03143 PF03144	PTHR23115 PTHR23115:SF146	EC:3.6.5.3	AT4G20360	RAB GTPase homolog E1B
Potri.015G104500	6.65499	105.946	3.99275	5.55229e-23	3.84588e-21	yes	Chr15:12336582-12338077	+	Chr15:12336582-12338077	+	-	-	-	-	GO:0048037/cofactor binding	-	PF00550	PTHR20863 PTHR20863:SF28		AT4G25050	acyl carrier protein 4
Potri.005G051900	87.2298	1.72965	-5.65627	5.90719e-23	4.08241e-21	yes	Chr05:3286440-3288473	+	Chr05:3286440-3288473	+	-	-	-	-	-	-		PTHR33881 PTHR33881:SF1
Potri.012G033866	5.25573	101.362	4.26949	6.52499e-23	4.49914e-21	yes	Chr12:3051173-3052333	+	Chr12:3051173-3052333	+	09100 Metabolism	09101 Carbohydrate metabolism	ko00520 Amino sugar and nucleotide sugar metabolism	-	-	-	PF00704	PTHR11177 PTHR11177:SF161	EC:3.2.1.14
Potri.T170700	107.972	10.2461	-3.39751	7.04996e-23	4.85011e-21	yes	scaffold_509:92728-93253	+	scaffold_509:92728-93253	+	-	-	-	-	-	-		PTHR33333 PTHR33333:SF5
Potri.018G129400	103.398	0	-8.45641	7.9134e-23	5.43184e-21	yes	Chr18:13993849-13995025	-	Chr18:13993849-13995025	-	-	-	-	-	GO:0009055/electron transfer activity|GO:0005507/copper ion binding	-	PF02298	PTHR33021 PTHR33021:SF55		AT5G20230	blue-copper-binding protein
Potri.003G057200	4.42436	98.1236	4.47106	9.75745e-23	6.68253e-21	yes	Chr03:8404176-8405837	+	Chr03:8404176-8405837	+	-	-	-	-	GO:0016747/transferase activity, transferring acyl groups other than amino-acyl groups	-	PF02458	PTHR31896 PTHR31896:SF12		AT3G50290	HXXXD-type acyl-transferase family protein
Potri.002G201600	296.992	113.069	-1.39322	9.87468e-23	6.74762e-21	yes	Chr02:16503501-16504878	-	Chr02:16503501-16504878	-	09180 Brite Hierarchies	09182 Protein families: genetic information processing	ko03000 Transcription factors	-	GO:0003700/DNA binding transcription factor activity	GO:0006355/regulation of transcription, DNA-templated	PF00847	PTHR31190 PTHR31190:SF27		AT2G47520	Integrase-type DNA-binding superfamily protein
Potri.005G183000	7.19564	106.4	3.88623	1.10484e-22	7.53276e-21	yes	Chr05:18975021-18976610	+	Chr05:18975021-18976610	+	-	-	-	-	GO:0016655/oxidoreductase activity, acting on NAD(P)H, quinone or similar compound as acceptor	GO:0055114/oxidation-reduction process	PF10664	PTHR36900 PTHR36900:SF1		AT4G37925	subunit NDH-M of NAD(P)H:plastoquinone dehydrogenase complex
Potri.001G382400	95.397	5.87069	-4.02234	1.16852e-22	7.94905e-21	yes	Chr01:40219227-40224230	-	Chr01:40219227-40224230	-	-	-	-	-	GO:0016706/oxidoreductase activity, acting on paired donors, with incorporation or reduction of molecular oxygen, 2-oxoglutarate as one donor, and incorporation of one atom each of oxygen into both donors|GO:0016491/oxidoreductase activity	GO:0055114/oxidation-reduction process	PF03171 PF14226	PTHR10209 PTHR10209:SF168	EC:1.14.11.31	AT1G78550	2-oxoglutarate (2OG) and Fe(II)-dependent oxygenase superfamily protein
Potri.002G020700	60.4531	229.46	1.92435	1.30127e-22	8.83235e-21	yes	Chr02:1278181-1279114	-	Chr02:1278181-1279114	-	-	-	-	-	GO:0031072/heat shock protein binding	-	PF00226	PTHR24078 PTHR24078:SF222
Potri.011G048400	91.0924	0	-7.27176	1.61775e-22	1.0956e-20	yes	Chr11:3866512-3867850	+	Chr11:3866512-3867850	+	09100 Metabolism	09103 Lipid metabolism	ko00140 Steroid hormone biosynthesis	-	GO:0008146/sulfotransferase activity	-	PF00685	PTHR11783 PTHR11783:SF74	EC:2.8.2.24	AT1G74090	desulfo-glucosinolate sulfotransferase 18
Potri.016G046200	156.344	32.3677	-2.27209	1.8854e-22	1.27403e-20	yes	Chr16:2958202-2964945	-	Chr16:2958202-2964945	-	09100 Metabolism|09180 Brite Hierarchies	09103 Lipid metabolism|09181 Protein families: metabolism	ko01040 Biosynthesis of unsaturated fatty acids|ko01004 Lipid biosynthesis proteins	-	GO:0016717/oxidoreductase activity, acting on paired donors, with oxidation of a pair of donors resulting in the reduction of molecular oxygen to two molecules of water|GO:0016491/oxidoreductase activity	GO:0006629/lipid metabolic process|GO:0055114/oxidation-reduction process	PF00487 PF11960|PF00487 PF11960	PTHR32100 PTHR32100:SF16|PTHR32100 PTHR32100:SF16	EC:1.14.19.6|EC:1.14.19.6	AT3G12120|AT3G12120	fatty acid desaturase 2|fatty acid desaturase 2
Potri.013G089600	8.62631	109.514	3.66623	2.18423e-22	1.46943e-20	yes	Chr13:9072070-9074516	-	Chr13:9072070-9074516	-	09190 Not Included in Pathway or Brite	09194 Poorly characterized	ko99997 Function unknown	-	-	-	PF05899	PTHR33271 PTHR33271:SF6		AT4G10300	RmlC-like cupins superfamily protein
Potri.001G152200	35.2565	175.483	2.31537	3.11383e-22	2.09018e-20	yes	Chr01:12754569-12756496	-	Chr01:12754569-12756496	-	09120 Genetic Information Processing|09180 Brite Hierarchies	09122 Translation|09182 Protein families: genetic information processing	ko03010 Ribosome|ko03011 Ribosome	GO:0005840/ribosome|GO:0005622/intracellular	GO:0003735/structural constituent of ribosome	GO:0006412/translation	PF01245	PTHR15680 PTHR15680:SF10		AT4G17560	Ribosomal protein L19 family protein
Potri.003G192800	13.2619	121.842	3.19966	3.65417e-22	2.44749e-20	yes	Chr03:19586452-19588953	-	Chr03:19586452-19588953	-	-	-	-	-	-	-		PTHR35753		AT5G07020	proline-rich family protein
Potri.015G087700	11.873	117.857	3.31127	3.92697e-22	2.62443e-20	yes	Chr15:11125946-11129724	-	Chr15:11125946-11129724	-	-	-	-	GO:0005634/nucleus	GO:0005515/protein binding|GO:0004402/histone acetyltransferase activity|GO:0008270/zinc ion binding|GO:0003712/transcription cofactor activity	GO:0006355/regulation of transcription, DNA-templated	PF00651 PF02135|PF00651 PF02135|PF02135	PTHR24413 PTHR24413:SF75|PTHR24413 PTHR24413:SF75|PTHR24413 PTHR24413:SF75	EC:2.3.1.48	AT3G48360|AT3G48360|AT3G48360	BTB and TAZ domain protein 2|BTB and TAZ domain protein 2|BTB and TAZ domain protein 2
Potri.001G253800	176.558	43.4483	-2.02277	3.95275e-22	2.63586e-20	yes	Chr01:27005185-27008603	+	Chr01:27005185-27008603	+	-	-	-	GO:0016021/integral component of membrane	GO:0022857/transmembrane transporter activity	GO:0055085/transmembrane transport	PF07690	PTHR23500 PTHR23500:SF14		AT1G77210	sugar transporter 14
Potri.016G025000	43.2166	191.451	2.14732	5.32173e-22	3.54099e-20	yes	Chr16:1400257-1402744	-	Chr16:1400257-1402744	-	09100 Metabolism	09108 Metabolism of cofactors and vitamins	ko00860 Porphyrin and chlorophyll metabolism	-	GO:0046872/metal ion binding|GO:0016491/oxidoreductase activity	GO:0055114/oxidation-reduction process	PF02915	PTHR31053 PTHR31053:SF2	EC:1.14.13.81	AT3G56940	dicarboxylate diiron protein, putative (Crd1)
Potri.008G124700	208.672	61.5224	-1.76205	5.37536e-22	3.56886e-20	yes	Chr08:8094461-8097249	-	Chr08:8094461-8097249	-	-	-	-	-	GO:0005515/protein binding	-	PF00564	PTHR31066 PTHR31066:SF12		AT2G01190	Octicosapeptide/Phox/Bem1p family protein
Potri.001G262200	4.72462	95.8952	4.34319	5.94209e-22	3.93654e-20	yes	Chr01:27824609-27829210	-	Chr01:27824609-27829210	-	-	-	-	-	-	-	PF11891	PTHR31620 PTHR31620:SF9
Potri.014G108900	171.282	41.11	-2.05881	6.01809e-22	3.97822e-20	yes	Chr14:7303127-7303723	-	Chr14:7303127-7303723	-	-	-	-	-	-	-		PTHR34376 PTHR34376:SF1
Potri.017G120301	386.447	176.81	-1.12807	6.64813e-22	4.38517e-20	yes	Chr17:12643552-12644275	+	Chr17:12643552-12644275	+	-	-	-	-	-	-
Potri.011G006000	275.052	102.192	-1.42842	7.27333e-22	4.78718e-20	yes	Chr11:505676-506560	+	Chr11:505676-506560	+	-	-	-	-	-	-
Potri.003G220900	30.0199	161.621	2.42862	8.95444e-22	5.88092e-20	yes	Chr03:21494909-21495337	-	Chr03:21494909-21495337	-	-	-	-	-	-	-		PTHR34114 PTHR34114:SF2
Potri.001G017500	44.1055	191.705	2.11986	1.11998e-21	7.33973e-20	yes	Chr01:1294710-1296161	+	Chr01:1294710-1296161	+	-	-	-	-	GO:0005515/protein binding	-	PF08263	PTHR27000 PTHR27000:SF151	EC:3.5.1.98	AT3G20820	Leucine-rich repeat (LRR) family protein
Potri.017G041700	2.09929	87.2946	5.37792	1.34062e-21	8.76676e-20	yes	Chr17:2802949-2807517	-	Chr17:2802949-2807517	-	09100 Metabolism	09109 Metabolism of terpenoids and polyketides	ko00900 Terpenoid backbone biosynthesis	-	GO:0000287/magnesium ion binding|GO:0016829/lyase activity|GO:0010333/terpene synthase activity	GO:0008152/metabolic process	PF01397 PF03936	PTHR31225 PTHR31225:SF5	EC:4.2.3.27
Potri.001G396600	15.4705	124.76	3.01157	1.92561e-21	1.25383e-19	yes	Chr01:42201665-42204666	+	Chr01:42201665-42204666	+	09120 Genetic Information Processing|09180 Brite Hierarchies	09122 Translation|09182 Protein families: genetic information processing	ko03010 Ribosome|ko03011 Ribosome	GO:0005840/ribosome|GO:0005622/intracellular	GO:0003723/RNA binding|GO:0003735/structural constituent of ribosome	GO:0006412/translation	PF01649	PTHR33398 PTHR33398:SF2		AT3G15190	chloroplast 30S ribosomal protein S20, putative
Potri.015G132900	0	91.4357	7.48693	2.52248e-21	1.63897e-19	yes	Chr15:14246305-14247982	+	Chr15:14246305-14247982	+	-	-	-	-	-	-	PF06232	PTHR31718 PTHR31718:SF8
Potri.014G019700	0	100.925	8.56287	2.85216e-21	1.84922e-19	yes	Chr14:1197548-1199183	-	Chr14:1197548-1199183	-	-	-	-	-	-	-	PF01370	PTHR32487 PTHR32487:SF0	EC:1.3.1.3	AT4G24220	NAD(P)-binding Rossmann-fold superfamily protein
Potri.010G068500	22.5009	141.524	2.65299	3.18545e-21	2.06092e-19	yes	Chr10:9685172-9685899	+	Chr10:9685172-9685899	+	09120 Genetic Information Processing|09180 Brite Hierarchies	09122 Translation|09182 Protein families: genetic information processing	ko03010 Ribosome|ko03011 Ribosome	GO:0005840/ribosome|GO:0005622/intracellular	GO:0003735/structural constituent of ribosome	GO:0006412/translation	PF00830	PTHR13528 PTHR13528:SF6		AT2G33450	Ribosomal L28 family
Potri.007G045100	5.83519	96.2372	4.04374	3.48962e-21	2.25292e-19	yes	Chr07:3955199-3957983	-	Chr07:3955199-3957983	-	-	-	-	-	GO:0042802/identical protein binding|GO:0004252/serine-type endopeptidase activity	GO:0043086/negative regulation of catalytic activity|GO:0006508/proteolysis	PF00082 PF02225 PF05922	PTHR10795 PTHR10795:SF402	EC:3.4.14.10	AT5G67090	Subtilisin-like serine endopeptidase family protein
Potri.005G170200	5.26092	94.2764	4.16351	3.90238e-21	2.51406e-19	yes	Chr05:17405879-17406367	-	Chr05:17405879-17406367	-	-	-	-	-	-	-		PTHR34950 PTHR34950:SF1
Potri.001G239700	25.3759	147.082	2.53508	6.13949e-21	3.94692e-19	yes	Chr01:25747543-25747921	+	Chr01:25747543-25747921	+	-	-	-	-	-	-
Potri.003G113500	12.0788	113.064	3.22659	7.82811e-21	5.02188e-19	yes	Chr03:13592993-13597373	-	Chr03:13592993-13597373	-	09180 Brite Hierarchies	09182 Protein families: genetic information processing	ko03012 Translation factors|ko03029 Mitochondrial biogenesis	-	GO:0003924/GTPase activity|GO:0005525/GTP binding	-	PF00009 PF00679 PF03144 PF03764 PF14492|PF00009 PF00679 PF03144 PF03764 PF14492	PTHR23115 PTHR23115:SF66|PTHR23115 PTHR23115:SF66		AT1G62750|AT1G62750	Translation elongation factor EFG/EF2 protein|Translation elongation factor EFG/EF2 protein
Potri.006G158900	6.67088	97.3686	3.86751	7.91419e-21	5.06641e-19	yes	Chr06:14184944-14189704	-	Chr06:14184944-14189704	-	09180 Brite Hierarchies	09183 Protein families: signaling and cellular processes	ko02000 Transporters	GO:0016021/integral component of membrane	GO:0005215/transporter activity	GO:0055085/transmembrane transport	PF00916 PF01740	PTHR11814 PTHR11814:SF54		AT5G19600	sulfate transporter 3;5
Potri.008G028500	86.1483	0	-7.62633	8.03685e-21	5.13413e-19	yes	Chr08:1503262-1505371	-	Chr08:1503262-1505371	-	-	-	-	-	GO:0003824/catalytic activity	GO:0009116/nucleoside metabolic process	PF01048	PTHR21234 PTHR21234:SF21	EC:3.2.2.9	AT4G24340	Phosphorylase superfamily protein
Potri.004G082000	0	90.3493	7.70187	9.32475e-21	5.94438e-19	yes	Chr04:6761658-6763851	-	Chr04:6761658-6763851	-	-	-	-	-	GO:0003824/catalytic activity	GO:0008152/metabolic process	PF00501 PF13193	PTHR24095 PTHR24095:SF189		AT1G68270	AMP-dependent synthetase and ligase family protein
Potri.010G026500	94.9039	8.35925	-3.50502	9.51359e-21	6.05207e-19	yes	Chr10:3844537-3848681	+	Chr10:3844537-3848681	+	09180 Brite Hierarchies	09183 Protein families: signaling and cellular processes	ko02000 Transporters	GO:0016021/integral component of membrane	GO:0022857/transmembrane transporter activity	GO:0055085/transmembrane transport	PF07690	PTHR23500 PTHR23500:SF62		AT5G18840	Major facilitator superfamily protein
Potri.009G027300	151.845	33.8694	-2.16454	9.56828e-21	6.07416e-19	yes	Chr09:3876757-3878367	-	Chr09:3876757-3878367	-	09180 Brite Hierarchies	09182 Protein families: genetic information processing	ko03000 Transcription factors	-	GO:0003677/DNA binding	-	PF00249|PF00249|PF00249	PTHR10641 PTHR10641:SF484|PTHR10641 PTHR10641:SF484|PTHR10641 PTHR10641:SF484		AT5G59780|AT5G59780|AT5G59780	myb domain protein 59|myb domain protein 59|myb domain protein 59
Potri.006G165800	34.5507	166.653	2.27006	1.0532e-20	6.67205e-19	yes	Chr06:16280854-16283658	-	Chr06:16280854-16283658	-	-	-	-	-	-	-	PF07466	PTHR37768 PTHR37768:SF1		AT5G57345	(1 of 2) PF07466 - Protein of unknown function (DUF1517) (DUF1517)
Potri.002G068100	85.5252	4.95886	-4.10827	1.06274e-20	6.71844e-19	yes	Chr02:4704189-4704392	+	Chr02:4704189-4704392	+	-	-	-	-	-	-
Potri.010G075800	98.9686	10.0093	-3.30562	1.09685e-20	6.91971e-19	yes	Chr10:10345926-10346472	+	Chr10:10345926-10346472	+	-	-	-	-	GO:0004867/serine-type endopeptidase inhibitor activity	GO:0009611/response to wounding	PF00280	PTHR33091 PTHR33091:SF14		AT2G38870	Serine protease inhibitor, potato inhibitor I-type family protein
Potri.008G079132	7.3318	98.7323	3.75128	1.13795e-20	7.16412e-19	yes	Chr08:4895834-4896324	+	Chr08:4895834-4896324	+	-	-	-	-	-	-	PF13202 PF13833	PTHR10891 PTHR10891:SF592
Potri.004G000400	337.358	148.394	-1.18485	1.21345e-20	7.6237e-19	yes	Chr04:58875-59786	+	Chr04:58875-59786	+	-	-	-	-	GO:0004866/endopeptidase inhibitor activity	-	PF00197	PTHR33107 PTHR33107:SF4
Potri.013G100700	157.084	385.442	1.29498	1.34677e-20	8.44382e-19	yes	Chr13:10775179-10777198	+	Chr13:10775179-10777198	+	-	-	-	-	GO:0003824/catalytic activity	GO:0009116/nucleoside metabolic process	PF01048	PTHR21234 PTHR21234:SF30	EC:3.2.2.9
Potri.008G164466	98.107	9.84468	-3.31694	1.42712e-20	8.92922e-19	yes	Chr08:11330935-11331802	-	Chr08:11330935-11331802	-	-	-	-	-	-	-	PF03479	PTHR31100 PTHR31100:SF3
Potri.006G002301	45.4629	188.126	2.04894	2.07757e-20	1.29722e-18	yes	Chr06:194399-195021	-	Chr06:194399-195021	-	-	-	-	-	-	-
Potri.005G228600	223.13	74.9094	-1.57467	2.1679e-20	1.34809e-18	yes	Chr05:22849517-22850671	+	Chr05:22849517-22850671	+	-	-	-	-	-	-		PTHR33872 PTHR33872:SF2		AT1G19530
Potri.001G335300	244.836	88.3529	-1.47046	2.23331e-20	1.38593e-18	yes	Chr01:34359749-34364587	-	Chr01:34359749-34364587	-	-	-	-	-	-	-	PF01490	PTHR22950 PTHR22950:SF298		AT5G40780	lysine histidine transporter 1
Potri.001G329500	13.4337	114.682	3.09371	2.4602e-20	1.52362e-18	yes	Chr01:33839118-33841023	-	Chr01:33839118-33841023	-	09120 Genetic Information Processing|09180 Brite Hierarchies	09122 Translation|09182 Protein families: genetic information processing	ko03010 Ribosome|ko03011 Ribosome	GO:0005840/ribosome|GO:0005622/intracellular	GO:0003735/structural constituent of ribosome	GO:0006412/translation	PF01016	PTHR15893		AT5G40950	ribosomal protein large subunit 27
Potri.005G053200	5.4285	91.1148	4.06906	3.25073e-20	2.00911e-18	yes	Chr05:3361402-3366494	+	Chr05:3361402-3366494	+	-	-	-	-	GO:0043565/sequence-specific DNA binding|GO:0046983/protein dimerization activity|GO:0003700/DNA binding transcription factor activity	GO:0006355/regulation of transcription, DNA-templated	PF00170 PF12498	PTHR22952 PTHR22952:SF90		AT5G28770	bZIP transcription factor family protein
Potri.015G002200	21.6745	134.895	2.63777	3.51904e-20	2.17053e-18	yes	Chr15:106854-110203	-	Chr15:106854-110203	-	-	-	-	-	GO:0005488/binding	-	PF02482 PF16321	PTHR33231 PTHR33231:SF1		AT5G24490	30S ribosomal protein, putative
Potri.003G222200	23.8407	139.977	2.55369	3.65049e-20	2.24705e-18	yes	Chr03:21561204-21563561	-	Chr03:21561204-21563561	-	-	-	-	-	-	-		PTHR17130 PTHR17130:SF24		AT1G55480	protein containing PDZ domain, a K-box domain, and a TPR region
Potri.004G045700	41.6574	178.886	2.1024	3.99126e-20	2.45184e-18	yes	Chr04:3612648-3614922	-	Chr04:3612648-3614922	-	09120 Genetic Information Processing|09180 Brite Hierarchies	09122 Translation|09182 Protein families: genetic information processing	ko03010 Ribosome|ko03011 Ribosome	GO:0005840/ribosome|GO:0005622/intracellular	GO:0003723/RNA binding|GO:0003735/structural constituent of ribosome	GO:0006412/translation	PF00333 PF03719	PTHR13718		AT2G33800	Ribosomal protein S5 family protein
Potri.018G100166	149.583	34.1605	-2.13055	4.12451e-20	2.52859e-18	yes	Chr18:12039734-12040823	+	Chr18:12039734-12040823	+	-	-	-	-	-	-
Potri.005G113100	107.45	300.211	1.4823	4.32067e-20	2.64352e-18	yes	Chr05:8224924-8225824	-	Chr05:8224924-8225824	-	-	-	-	-	GO:0031072/heat shock protein binding	-	PF00226	PTHR24078		AT4G36040	Chaperone DnaJ-domain superfamily protein
Potri.005G145000	2.80286	82.6525	4.88209	4.54127e-20	2.77291e-18	yes	Chr05:11793683-11795586	-	Chr05:11793683-11795586	-	-	-	-	-	-	-	PF00561	PTHR10992 PTHR10992:SF776		AT4G37470	alpha/beta-Hydrolases superfamily protein
Potri.005G014300	81.9682	255.151	1.63821	5.3705e-20	3.27267e-18	yes	Chr05:1134039-1135262	-	Chr05:1134039-1135262	-	09190 Not Included in Pathway or Brite	09191 Unclassified: metabolism	ko99980 Enzymes with EC numbers	-	GO:0030410/nicotianamine synthase activity	GO:0030418/nicotianamine biosynthetic process	PF03059	PTHR32266 PTHR32266:SF12	EC:2.5.1.43	AT5G04950	nicotianamine synthase 1
Potri.010G078800	6.20649	92.5903	3.89901	5.47989e-20	3.33265e-18	yes	Chr10:10534356-10535806	-	Chr10:10534356-10535806	-	-	-	-	-	-	-		PTHR36399		AT5G43750	NAD(P)H dehydrogenase 18
Potri.016G018500	186.53	54.5739	-1.77312	5.59276e-20	3.3945e-18	yes	Chr16:970556-976297	+	Chr16:970556-976297	+	09100 Metabolism	09101 Carbohydrate metabolism|09105 Amino acid metabolism	ko00650 Butanoate metabolism|ko00250 Alanine, aspartate and glutamate metabolism	-	GO:0030170/pyridoxal phosphate binding|GO:0008483/transaminase activity	-	PF00202	PTHR11986 PTHR11986:SF90	EC:2.6.1.19 EC:2.6.1.96	AT3G22200	Pyridoxal phosphate (PLP)-dependent transferases superfamily protein
Potri.006G218000	0	85.3667	7.52558	5.84523e-20	3.54067e-18	yes	Chr06:22317991-22322163	-	Chr06:22317991-22322163	-	09100 Metabolism|09150 Organismal Systems	09103 Lipid metabolism|09159 Environmental adaptation	ko00062 Fatty acid elongation|ko04626 Plant-pathogen interaction	GO:0016020/membrane	GO:0016747/transferase activity, transferring acyl groups other than amino-acyl groups	GO:0006633/fatty acid biosynthetic process	PF08392 PF08541	PTHR31561 PTHR31561:SF2	EC:2.3.1.199	AT2G26250	3-ketoacyl-CoA synthase 10
Potri.009G037000	7.12988	95.0337	3.73649	6.69122e-20	4.04506e-18	yes	Chr09:4629655-4632563	+	Chr09:4629655-4632563	+	09120 Genetic Information Processing|09180 Brite Hierarchies	09122 Translation|09182 Protein families: genetic information processing	ko03013 RNA transport|ko03015 mRNA surveillance pathway|ko03019 Messenger RNA biogenesis|ko03041 Spliceosome	-	-	-	PF05368	PTHR14194 PTHR14194:SF38		AT3G46780	plastid transcriptionally active 16
Potri.008G214600	9.94128	102.662	3.36833	9.27059e-20	5.59326e-18	yes	Chr08:16875848-16876153	-	Chr08:16875848-16876153	-	09180 Brite Hierarchies	09182 Protein families: genetic information processing	ko03110 Chaperones and folding catalysts	-	GO:0015035/protein disulfide oxidoreductase activity|GO:0009055/electron transfer activity	GO:0045454/cell redox homeostasis	PF00462	PTHR10168 PTHR10168:SF115	EC:1.8.1.9	AT4G15680	Thioredoxin superfamily protein
Potri.004G208500	149.176	35.0605	-2.08909	1.24006e-19	7.4669e-18	yes	Chr04:21552987-21555813	+	Chr04:21552987-21555813	+	09100 Metabolism|09130 Environmental Information Processing|09150 Organismal Systems	09109 Metabolism of terpenoids and polyketides|09132 Signal transduction|09154 Digestive system	ko00900 Terpenoid backbone biosynthesis|ko04152 AMPK signaling pathway|ko04976 Bile secretion	-	GO:0004420/hydroxymethylglutaryl-CoA reductase (NADPH) activity|GO:0050662/coenzyme binding	GO:0055114/oxidation-reduction process|GO:0015936/coenzyme A metabolic process	PF00368	PTHR10572 PTHR10572:SF9	EC:1.1.1.34
Potri.004G012100	42.9507	178.855	2.05804	1.36846e-19	8.22375e-18	yes	Chr04:741182-744975	-	Chr04:741182-744975	-	09100 Metabolism	09102 Energy metabolism	ko00920 Sulfur metabolism	-	GO:0003824/catalytic activity	GO:0008152/metabolic process|GO:0045454/cell redox homeostasis	PF00085 PF01507	PTHR23293 PTHR23293:SF11	EC:1.8.4.10 EC:1.8.4.9	AT4G21990	APS reductase 3
Potri.007G120600	77.3309	0	-7.09427	1.39316e-19	8.35566e-18	yes	Chr07:13848841-13849913	+	Chr07:13848841-13849913	+	-	-	-	-	-	-	PF01657	PTHR32411
Potri.010G061100	143.036	32.3162	-2.14605	1.88047e-19	1.12562e-17	yes	Chr10:9097403-9098444	-	Chr10:9097403-9098444	-	09100 Metabolism|09150 Organismal Systems|09160 Human Diseases|09180 Brite Hierarchies	09106 Metabolism of other amino acids|09111 Xenobiotics biodegradation and metabolism|09149 Aging|09161 Cancer: overview|09162 Cancer: specific types|09166 Cardiovascular disease|09176 Drug resistance: antineoplastic|09183 Protein families: signaling and cellular processes	ko00480 Glutathione metabolism|ko00980 Metabolism of xenobiotics by cytochrome P450|ko00982 Drug metabolism - cytochrome P450|ko00983 Drug metabolism - other enzymes|ko04212 Longevity regulating pathway - worm|ko05200 Pathways in cancer|ko05204 Chemical carcinogenesis|ko05225 Hepatocellular carcinoma|ko05418 Fluid shear stress and atherosclerosis|ko01524 Platinum drug resistance|ko02000 Transport…	-	GO:0005515/protein binding	-	PF00043 PF02798	PTHR11260 PTHR11260:SF227	EC:2.5.1.18
Potri.015G087600	10.0802	101.491	3.33176	2.23147e-19	1.3331e-17	yes	Chr15:11120042-11121015	-	Chr15:11120042-11121015	-	09190 Not Included in Pathway or Brite	09191 Unclassified: metabolism	ko99980 Enzymes with EC numbers	-	GO:0016671/oxidoreductase activity, acting on a sulfur group of donors, disulfide as acceptor	GO:0055114/oxidation-reduction process|GO:0019538/protein metabolic process	PF01625	PTHR10173 PTHR10173:SF41	EC:1.8.4.11
Potri.018G088500	0	99.9962	9.33497	2.36317e-19	1.40625e-17	yes	Chr18:10723620-10725495	-	Chr18:10723620-10725495	-	-	-	-	-	GO:0016788/hydrolase activity, acting on ester bonds	GO:0006629/lipid metabolic process	PF00657	PTHR22835 PTHR22835:SF157	EC:3.1.1.3
Potri.019G043600	5.20407	86.8998	4.06164	2.48188e-19	1.47401e-17	yes	Chr19:6037311-6039681	+	Chr19:6037311-6039681	+	09190 Not Included in Pathway or Brite	09191 Unclassified: metabolism	ko99980 Enzymes with EC numbers	-	GO:0016747/transferase activity, transferring acyl groups other than amino-acyl groups	-	PF02458	PTHR31642 PTHR31642:SF9	EC:2.3.1.196	AT3G03480	acetyl CoA:(Z)-3-hexen-1-ol acetyltransferase
Potri.005G108900	1.14034	76.9285	6.07599	2.51585e-19	1.49127e-17	yes	Chr05:7898189-7899798	+	Chr05:7898189-7899798	+	09100 Metabolism	09110 Biosynthesis of other secondary metabolites	ko00940 Phenylpropanoid biosynthesis	-	GO:0020037/heme binding|GO:0004601/peroxidase activity	GO:0055114/oxidation-reduction process|GO:0006979/response to oxidative stress	PF00141	PTHR31235 PTHR31235:SF67	EC:1.11.1.7
Potri.010G045100	112.666	303.663	1.43042	2.96956e-19	1.75678e-17	yes	Chr10:7705198-7711304	+	Chr10:7705198-7711304	+	09100 Metabolism|09180 Brite Hierarchies	09101 Carbohydrate metabolism|09102 Energy metabolism|09105 Amino acid metabolism|09181 Protein families: metabolism	ko00630 Glyoxylate and dicarboxylate metabolism|ko00710 Carbon fixation in photosynthetic organisms|ko00250 Alanine, aspartate and glutamate metabolism|ko00260 Glycine, serine and threonine metabolism|ko00220 Arginine biosynthesis|ko01007 Amino acid related enzymes	-	GO:0030170/pyridoxal phosphate binding|GO:0016769/transferase activity, transferring nitrogenous groups	GO:0009058/biosynthetic process	PF00155|PF00155|PF00155|PF00155	PTHR11751 PTHR11751:SF373|PTHR11751 PTHR11751:SF373|PTHR11751 PTHR11751:SF373|PTHR11751 PTHR11751:SF373	EC:2.3.2.2 EC:2.6.1.2 EC:2.6.1.4 EC:2.6.1.44|EC:2.3.2.2 EC:2.6.1.2 EC:2.6.1.4 EC:2.6.1.44|EC:2.3.2.2 EC:2.6.1.2 EC:2.6.1.4 EC:2.6.1.44|EC:2.3.2.2 EC:2.6.1.2 EC:2.6.1.4 EC:2.6.1.44	AT1G23310|AT1G23310|AT1G23310|AT1G23310	glutamate:glyoxylate aminotransferase|glutamate:glyoxylate aminotransferase|glutamate:glyoxylate aminotransferase|glutamate:glyoxylate aminotransferase
Potri.011G066200	100.512	0	-9.71066	3.5958e-19	2.12313e-17	yes	Chr11:5672276-5673800	+	Chr11:5672276-5673800	+	-	-	-	-	GO:0005529/carbohydrate binding	GO:0048544/recognition of pollen	PF00954 PF01453	PTHR32444 PTHR32444:SF15		AT1G78860	D-mannose binding lectin protein with Apple-like carbohydrate-binding domain
Potri.013G102100	118.293	312.394	1.401	3.73918e-19	2.20351e-17	yes	Chr13:11060752-11061876	+	Chr13:11060752-11061876	+	-	-	-	-	GO:0016209/antioxidant activity|GO:0016491/oxidoreductase activity	GO:0055114/oxidation-reduction process	PF00578	PTHR10430 PTHR10430:SF16	EC:1.11.1.15	AT3G52960	Thioredoxin superfamily protein
Potri.011G129700	74.7555	3.11211	-4.58622	3.74706e-19	2.20388e-17	yes	Chr11:16360023-16362563	+	Chr11:16360023-16362563	+	09130 Environmental Information Processing	09132 Signal transduction	ko04075 Plant hormone signal transduction	-	-	-	PF03321	PTHR31901 PTHR31901:SF2		AT4G27260	Auxin-responsive GH3 family protein
Potri.005G038700	10.3098	101.113	3.29389	3.95674e-19	2.32271e-17	yes	Chr05:2485374-2487640	+	Chr05:2485374-2487640	+	-	-	-	-	-	-	PF04536	PTHR30373 PTHR30373:SF2	EC:3.1.3.2	AT1G54780	thylakoid lumen 18.3 kDa protein
Potri.008G079500	73.5987	3.06509	-4.58568	7.02383e-19	4.10732e-17	yes	Chr08:4921277-4925916	-	Chr08:4921277-4925916	-	-	-	-	-	GO:0004553/hydrolase activity, hydrolyzing O-glycosyl compounds	GO:0005975/carbohydrate metabolic process	PF00759	PTHR22298 PTHR22298:SF39	EC:3.2.1.4	AT1G65610	Six-hairpin glycosidases superfamily protein
Potri.014G092200	29.2618	146.278	2.32162	7.43184e-19	4.33757e-17	yes	Chr14:5977746-5979709	+	Chr14:5977746-5979709	+	-	-	-	-	-	-	PF10184	PTHR31094 PTHR31094:SF2		AT2G46220	Uncharacterized conserved protein (DUF2358)
Potri.006G098100	70.7163	1.78898	-5.30483	7.85011e-19	4.57291e-17	yes	Chr06:7504455-7506061	-	Chr06:7504455-7506061	-	09180 Brite Hierarchies	09183 Protein families: signaling and cellular processes	ko02000 Transporters	GO:0016020/membrane	GO:0005215/transporter activity	GO:0006810/transport	PF00230	PTHR19139 PTHR19139:SF169		AT4G23400	plasma membrane intrinsic protein 1;5
Potri.009G136600	148.484	359.216	1.27454	7.87144e-19	4.57657e-17	yes	Chr09:11006824-11008743	-	Chr09:11006824-11008743	-	09180 Brite Hierarchies	09183 Protein families: signaling and cellular processes	ko02000 Transporters	GO:0016020/membrane	GO:0005215/transporter activity	GO:0006810/transport	PF00230	PTHR19139 PTHR19139:SF152
Potri.015G031200	89.4976	261.377	1.54621	8.11086e-19	4.70677e-17	yes	Chr15:2387095-2389408	+	Chr15:2387095-2389408	+	-	-	-	-	-	-	PF05542	PTHR31808 PTHR31808:SF4		AT1G48450	Protein of unknown function (DUF760)
Potri.001G239650	23.6859	133.358	2.49321	8.74713e-19	5.06634e-17	yes	Chr01:25746738-25747628	+	Chr01:25746738-25747628	+	-	-	-	-	-	-	PF01439	PTHR33543		AT5G02380	metallothionein 2B
Potri.018G091401	113.668	19.6585	-2.5316	1.1376e-18	6.57646e-17	yes	Chr18:11190495-11191234	-	Chr18:11190495-11191234	-	09100 Metabolism	09101 Carbohydrate metabolism|09102 Energy metabolism	ko00630 Glyoxylate and dicarboxylate metabolism|ko00710 Carbon fixation in photosynthetic organisms	-	-	-	PF00101	PTHR31262	EC:4.1.1.39
Potri.018G110800	141.285	346.267	1.29327	1.26295e-18	7.28727e-17	yes	Chr18:12848690-12850382	-	Chr18:12848690-12850382	-	09180 Brite Hierarchies	09183 Protein families: signaling and cellular processes	ko04147 Exosome	-	GO:0005488/binding	-	PF00061	PTHR10612 PTHR10612:SF19	EC:1.14.13.90	AT5G58070	temperature-induced lipocalin
Potri.003G112600	60.4271	207.806	1.78197	1.29913e-18	7.48178e-17	yes	Chr03:13500388-13505882	+	Chr03:13500388-13505882	+	09100 Metabolism	09101 Carbohydrate metabolism	ko00052 Galactose metabolism|ko00500 Starch and sucrose metabolism	-	-	-	PF00251 PF08244 PF11837	PTHR31953 PTHR31953:SF17	EC:3.2.1.26	AT1G62660	Glycosyl hydrolases family 32 protein
Potri.012G113800	72.8878	0	-7.04985	1.34369e-18	7.72378e-17	yes	Chr12:13311260-13314024	+	Chr12:13311260-13314024	+	-	-	-	-	-	-	PF12796 PF13962	PTHR24177 PTHR24177:SF14		AT5G51160	Ankyrin repeat family protein
Potri.008G053100	145.65	35.8597	-2.02207	1.59059e-18	9.12578e-17	yes	Chr08:3128259-3132577	-	Chr08:3128259-3132577	-	09100 Metabolism	09101 Carbohydrate metabolism	ko00520 Amino sugar and nucleotide sugar metabolism	-	GO:0003854/3-beta-hydroxy-delta5-steroid dehydrogenase activity|GO:0050662/coenzyme binding|GO:0003824/catalytic activity|GO:0008831/dTDP-4-dehydrorhamnose reductase activity	GO:0055114/oxidation-reduction process|GO:0044237/cellular metabolic process|GO:0006694/steroid biosynthetic process|GO:0009058/biosynthetic process|GO:0045226/extracellular polysaccharide biosynthetic process	PF01073|PF01073|PF01073	PTHR10366 PTHR10366:SF323|PTHR10366 PTHR10366:SF323|PTHR10366 PTHR10366:SF323	EC:4.1.1.35|EC:4.1.1.35|EC:4.1.1.35
Potri.007G049800	260.934	105.641	-1.30451	1.63241e-18	9.3481e-17	yes	Chr07:4713617-4714844	+	Chr07:4713617-4714844	+	-	-	-	-	-	-		PTHR34686 PTHR34686:SF3|PTHR34686 PTHR34686:SF3		AT4G37300|AT4G37300	maternal effect embryo arrest 59|maternal effect embryo arrest 59
Potri.009G121300	238.861	91.2427	-1.38839	1.65022e-18	9.43233e-17	yes	Chr09:10158844-10161812	+	Chr09:10158844-10161812	+	09140 Cellular Processes|09150 Organismal Systems|09180 Brite Hierarchies	09141 Transport and catabolism|09143 Cell growth and death|09159 Environmental adaptation|09181 Protein families: metabolism	ko04142 Lysosome|ko04210 Apoptosis|ko04626 Plant-pathogen interaction|ko01002 Peptidases and inhibitors	-	GO:0008234/cysteine-type peptidase activity	GO:0006508/proteolysis	PF00112 PF08246	PTHR12411 PTHR12411:SF338	EC:3.4.22.15	AT2G21430	Papain family cysteine protease
Potri.006G144500	176.886	53.34	-1.72953	1.80057e-18	1.02724e-16	yes	Chr06:12240313-12246665	+	Chr06:12240313-12246665	+	-	-	-	-	GO:0005529/carbohydrate binding|GO:0004553/hydrolase activity, hydrolyzing O-glycosyl compounds	GO:0005975/carbohydrate metabolic process	PF01301 PF02140	PTHR23421 PTHR23421:SF74	EC:3.2.1.23
Potri.019G017300	68.7854	1.19233	-5.85025	2.01038e-18	1.14479e-16	yes	Chr19:2795346-2795863	-	Chr19:2795346-2795863	-	-	-	-	-	-	-
Potri.016G104500	70.5915	0	-6.69212	2.05622e-18	1.1687e-16	yes	Chr16:10725099-10726498	+	Chr16:10725099-10726498	+	09100 Metabolism|09150 Organismal Systems|09160 Human Diseases|09180 Brite Hierarchies	09106 Metabolism of other amino acids|09111 Xenobiotics biodegradation and metabolism|09149 Aging|09161 Cancer: overview|09162 Cancer: specific types|09166 Cardiovascular disease|09176 Drug resistance: antineoplastic|09183 Protein families: signaling and cellular processes	ko00480 Glutathione metabolism|ko00980 Metabolism of xenobiotics by cytochrome P450|ko00982 Drug metabolism - cytochrome P450|ko00983 Drug metabolism - other enzymes|ko04212 Longevity regulating pathway - worm|ko05200 Pathways in cancer|ko05204 Chemical carcinogenesis|ko05225 Hepatocellular carcinoma|ko05418 Fluid shear stress and atherosclerosis|ko01524 Platinum drug resistance|ko02000 Transport…	-	GO:0005515/protein binding	-	PF02798	PTHR11260 PTHR11260:SF303	EC:2.5.1.18
Potri.016G118500	75.3887	4.4329	-4.08802	2.17898e-18	1.23616e-16	yes	Chr16:12380223-12381524	-	Chr16:12380223-12381524	-	09100 Metabolism|09150 Organismal Systems|09160 Human Diseases|09180 Brite Hierarchies	09106 Metabolism of other amino acids|09111 Xenobiotics biodegradation and metabolism|09149 Aging|09161 Cancer: overview|09162 Cancer: specific types|09166 Cardiovascular disease|09176 Drug resistance: antineoplastic|09183 Protein families: signaling and cellular processes	ko00480 Glutathione metabolism|ko00980 Metabolism of xenobiotics by cytochrome P450|ko00982 Drug metabolism - cytochrome P450|ko00983 Drug metabolism - other enzymes|ko04212 Longevity regulating pathway - worm|ko05200 Pathways in cancer|ko05204 Chemical carcinogenesis|ko05225 Hepatocellular carcinoma|ko05418 Fluid shear stress and atherosclerosis|ko01524 Platinum drug resistance|ko02000 Transport…	-	GO:0005515/protein binding	-	PF00043 PF13417	PTHR11260 PTHR11260:SF327	EC:2.5.1.18
Potri.016G072100	27.983	141.054	2.33363	2.39419e-18	1.35573e-16	yes	Chr16:5355070-5358639	-	Chr16:5355070-5358639	-	09140 Cellular Processes|09180 Brite Hierarchies	09143 Cell growth and death|09183 Protein families: signaling and cellular processes	ko04214 Apoptosis - fly|ko04147 Exosome	-	GO:0016209/antioxidant activity|GO:0016491/oxidoreductase activity	GO:0055114/oxidation-reduction process	PF08534 PF10417|PF08534 PF10417	PTHR10681 PTHR10681:SF105|PTHR10681 PTHR10681:SF105	EC:1.11.1.15|EC:1.11.1.15	AT5G06290|AT5G06290	2-cysteine peroxiredoxin B|2-cysteine peroxiredoxin B
Potri.006G151500	88.239	9.34363	-3.23936	2.46229e-18	1.39169e-16	yes	Chr06:13269396-13271954	+	Chr06:13269396-13271954	+	-	-	-	-	-	-	PF11510	PTHR32094 PTHR32094:SF5		AT4G29560	(1 of 1) PF11510 - Fanconi Anaemia group E protein FANCE (FA_FANCE)
Potri.013G117000	1.11062	72.5943	6.03042	2.46941e-18	1.39313e-16	yes	Chr13:12538176-12539347	+	Chr13:12538176-12539347	+	09100 Metabolism|09180 Brite Hierarchies	09102 Energy metabolism|09181 Protein families: metabolism	ko00190 Oxidative phosphorylation|ko00195 Photosynthesis|ko00194 Photosynthesis proteins	GO:0045261/proton-transporting ATP synthase complex, catalytic core F(1)|GO:0005886/plasma membrane	GO:0046933/proton-transporting ATP synthase activity, rotational mechanism	GO:0015986/ATP synthesis coupled proton transport	PF00213	PTHR11910 PTHR11910:SF7	EC:3.6.3.14	AT4G09650	ATP synthase delta-subunit gene
Potri.016G132200	85.9736	8.50514	-3.33749	2.64399e-18	1.48886e-16	yes	Chr16:13637005-13641014	-	Chr16:13637005-13641014	-	09100 Metabolism|09180 Brite Hierarchies	09105 Amino acid metabolism|09181 Protein families: metabolism	ko00250 Alanine, aspartate and glutamate metabolism|ko00260 Glycine, serine and threonine metabolism|ko00270 Cysteine and methionine metabolism|ko00280 Valine, leucine and isoleucine degradation|ko01007 Amino acid related enzymes	-	GO:0030170/pyridoxal phosphate binding|GO:0008483/transaminase activity	-	PF00202	PTHR11986 PTHR11986:SF66	EC:2.6.1.44	AT3G08860	PYRIMIDINE 4
Potri.018G063500	78.523	5.70496	-3.78283	2.68192e-18	1.50743e-16	yes	Chr18:7500285-7506672	-	Chr18:7500285-7506672	-	09100 Metabolism|09180 Brite Hierarchies	09101 Carbohydrate metabolism|09181 Protein families: metabolism	ko00500 Starch and sucrose metabolism|ko01003 Glycosyltransferases	-	-	GO:0009058/biosynthetic process|GO:0005985/sucrose metabolic process	PF00534 PF00862|PF00534 PF00862|PF00534 PF00862|PF00534 PF00862|PF00534 PF00862	PTHR12526 PTHR12526:SF391|PTHR12526 PTHR12526:SF391|PTHR12526 PTHR12526:SF391|PTHR12526 PTHR12526:SF391|PTHR12526 PTHR12526:SF391	EC:2.4.1.13|EC:2.4.1.13|EC:2.4.1.13|EC:2.4.1.13|EC:2.4.1.13	AT5G20830|AT5G20830|AT5G20830|AT5G20830|AT5G20830	sucrose synthase 1|sucrose synthase 1|sucrose synthase 1|sucrose synthase 1|sucrose synthase 1
Potri.017G108500	65.5708	215.09	1.71382	3.2851e-18	1.84305e-16	yes	Chr17:11700182-11701211	-	Chr17:11700182-11701211	-	-	-	-	-	-	-		PTHR34191 PTHR34191:SF2	EC:1.1.1.39	AT5G38760	Late embryogenesis abundant protein (LEA) family protein
Potri.008G031700	21.7743	125.931	2.53194	3.96013e-18	2.21767e-16	yes	Chr08:1699476-1704159	+	Chr08:1699476-1704159	+	09100 Metabolism	09101 Carbohydrate metabolism|09102 Energy metabolism	ko00620 Pyruvate metabolism|ko00710 Carbon fixation in photosynthetic organisms	-	GO:0016615/malate dehydrogenase activity|GO:0016616/oxidoreductase activity, acting on the CH-OH group of donors, NAD or NADP as acceptor|GO:0016491/oxidoreductase activity	GO:0055114/oxidation-reduction process|GO:0006108/malate metabolic process	PF00056 PF02866|PF00056 PF02866	PTHR23382 PTHR23382:SF0|PTHR23382 PTHR23382:SF0	EC:1.1.1.82|EC:1.1.1.82	AT5G58330|AT5G58330	lactate/malate dehydrogenase family protein|lactate/malate dehydrogenase family protein
Potri.011G114000	78.9702	238.736	1.59604	3.97541e-18	2.22214e-16	yes	Chr11:14437218-14438352	-	Chr11:14437218-14438352	-	09100 Metabolism|09150 Organismal Systems|09160 Human Diseases|09180 Brite Hierarchies	09106 Metabolism of other amino acids|09111 Xenobiotics biodegradation and metabolism|09149 Aging|09161 Cancer: overview|09162 Cancer: specific types|09166 Cardiovascular disease|09176 Drug resistance: antineoplastic|09183 Protein families: signaling and cellular processes	ko00480 Glutathione metabolism|ko00980 Metabolism of xenobiotics by cytochrome P450|ko00982 Drug metabolism - cytochrome P450|ko00983 Drug metabolism - other enzymes|ko04212 Longevity regulating pathway - worm|ko05200 Pathways in cancer|ko05204 Chemical carcinogenesis|ko05225 Hepatocellular carcinoma|ko05418 Fluid shear stress and atherosclerosis|ko01524 Platinum drug resistance|ko02000 Transport…	-	GO:0005515/protein binding	-	PF00043 PF02798|PF00043 PF02798	PTHR11260 PTHR11260:SF317|PTHR11260 PTHR11260:SF317	EC:2.5.1.18|EC:2.5.1.18
Potri.008G198600	52.0334	189.199	1.86239	4.00224e-18	2.23303e-16	yes	Chr08:14031241-14032270	-	Chr08:14031241-14032270	-	09190 Not Included in Pathway or Brite	09191 Unclassified: metabolism	ko99980 Enzymes with EC numbers	-	GO:0008113/peptide-methionine (S)-S-oxide reductase activity	GO:0055114/oxidation-reduction process	PF01641	PTHR10173 PTHR10173:SF19	EC:1.8.4.12
Potri.014G139500	39.3364	164.03	2.06002	4.06028e-18	2.26126e-16	yes	Chr14:9489659-9493752	+	Chr14:9489659-9493752	+	09180 Brite Hierarchies	09181 Protein families: metabolism|09182 Protein families: genetic information processing	ko01002 Peptidases and inhibitors|ko03110 Chaperones and folding catalysts	-	GO:0005524/ATP binding|GO:0004222/metalloendopeptidase activity|GO:0016887/ATPase activity	GO:0006508/proteolysis	PF01434 PF07728|PF01434 PF07728	PTHR23076 PTHR23076:SF60|PTHR23076 PTHR23076:SF60		AT1G06430|AT1G06430	FTSH protease 8|FTSH protease 8
Potri.008G157400	2.33544	72.6927	4.96005	6.33243e-18	3.52023e-16	yes	Chr08:10794370-10797482	+	Chr08:10794370-10797482	+	09100 Metabolism	09105 Amino acid metabolism	ko00270 Cysteine and methionine metabolism	-	-	GO:0006355/regulation of transcription, DNA-templated|GO:0055114/oxidation-reduction process	PF07883	PTHR23418 PTHR23418:SF4	EC:1.13.11.54	AT5G43850	RmlC-like cupins superfamily protein
Potri.001G278400	82.654	7.82685	-3.40058	6.77779e-18	3.76093e-16	yes	Chr01:29159449-29163397	-	Chr01:29159449-29163397	-	09100 Metabolism|09180 Brite Hierarchies	09105 Amino acid metabolism|09181 Protein families: metabolism	ko00250 Alanine, aspartate and glutamate metabolism|ko01002 Peptidases and inhibitors	-	GO:0004066/asparagine synthase (glutamine-hydrolyzing) activity	GO:0006529/asparagine biosynthetic process	PF00733 PF12481|PF00733 PF12481	PTHR11772 PTHR11772:SF13|PTHR11772 PTHR11772:SF13	EC:6.3.5.4|EC:6.3.5.4	AT3G47340|AT3G47340	glutamine-dependent asparagine synthase 1|glutamine-dependent asparagine synthase 1
Potri.010G110400	4.09966	77.5042	4.2407	7.90831e-18	4.38025e-16	yes	Chr10:13064545-13066096	+	Chr10:13064545-13066096	+	-	-	-	-	GO:0016655/oxidoreductase activity, acting on NAD(P)H, quinone or similar compound as acceptor	GO:0055114/oxidation-reduction process	PF10716|PF10716	PTHR36727 PTHR36727:SF2|PTHR36727 PTHR36727:SF2		AT1G70760|AT1G70760	inorganic carbon transport protein-related|inorganic carbon transport protein-related
Potri.007G022700	24.8729	131.613	2.40365	8.15781e-18	4.50204e-16	yes	Chr07:1739725-1743524	-	Chr07:1739725-1743524	-	09100 Metabolism	09102 Energy metabolism	ko00190 Oxidative phosphorylation	GO:0005737/cytoplasm	GO:0000287/magnesium ion binding|GO:0004427/inorganic diphosphatase activity	GO:0006796/phosphate-containing compound metabolic process	PF00719	PTHR10286 PTHR10286:SF13	EC:3.6.1.1
Potri.002G239700	0	71.0532	6.50188	8.4077e-18	4.63155e-16	yes	Chr02:23201230-23202460	-	Chr02:23201230-23202460	-	09100 Metabolism|09180 Brite Hierarchies	09102 Energy metabolism|09181 Protein families: metabolism	ko00195 Photosynthesis|ko00194 Photosynthesis proteins	GO:0009538/photosystem I reaction center	-	GO:0015979/photosynthesis	PF02605	PTHR34803 PTHR34803:SF2	EC:1.97.1.12	AT4G12800	photosystem I subunit l
Potri.005G163000	88.7092	10.3599	-3.09807	8.49265e-18	4.66988e-16	yes	Chr05:16082862-16084886	-	Chr05:16082862-16084886	-	-	-	-	-	-	-	PF04674	PTHR31279 PTHR31279:SF8
Potri.019G006900	66.3302	1.68715	-5.297	9.3188e-18	5.11491e-16	yes	Chr19:1537569-1543893	+	Chr19:1537569-1543893	+	-	-	-	-	GO:0004866/endopeptidase inhibitor activity	-	PF00197	PTHR33107 PTHR33107:SF4
Potri.004G053400	15.9536	109.139	2.77421	1.65882e-17	9.08856e-16	yes	Chr04:4337935-4340138	-	Chr04:4337935-4340138	-	09100 Metabolism	09108 Metabolism of cofactors and vitamins	ko00860 Porphyrin and chlorophyll metabolism	-	GO:0003677/DNA binding|GO:0005524/ATP binding|GO:0016851/magnesium chelatase activity	GO:0015979/photosynthesis|GO:0015995/chlorophyll biosynthetic process|GO:0006260/DNA replication	PF01078	PTHR32039 PTHR32039:SF9	EC:6.6.1.1	AT5G45930	magnesium chelatase i2
Potri.004G064500	0	92.7687	9.59762	1.68938e-17	9.23932e-16	yes	Chr04:5482356-5484999	-	Chr04:5482356-5484999	-	-	-	-	-	GO:0016788/hydrolase activity, acting on ester bonds	GO:0006629/lipid metabolic process	PF00657	PTHR22835 PTHR22835:SF120	EC:3.1.1.3	AT4G18970	GDSL-like Lipase/Acylhydrolase superfamily protein
Potri.011G074067	18.2999	114.308	2.64302	2.24732e-17	1.22687e-15	yes	Chr11:7849407-7849934	-	Chr11:7849407-7849934	-	-	-	-	-	-	-
Potri.010G079000	150.994	41.7731	-1.85385	2.40527e-17	1.31075e-15	yes	Chr10:10545932-10547620	-	Chr10:10545932-10547620	-	09140 Cellular Processes|09180 Brite Hierarchies	09141 Transport and catabolism|09143 Cell growth and death|09181 Protein families: metabolism	ko04138 Autophagy - yeast|ko04113 Meiosis - yeast|ko01001 Protein kinases	GO:0016020/membrane	GO:0005524/ATP binding|GO:0004672/protein kinase activity	GO:0009103/lipopolysaccharide biosynthetic process|GO:0007165/signal transduction|GO:0006468/protein phosphorylation	PF03822 PF14531	PTHR24343 PTHR24343:SF102	EC:2.7.11.1	AT3G23000	CBL-interacting protein kinase 7
Potri.008G171000	18.2463	113.924	2.64239	2.56482e-17	1.39519e-15	yes	Chr08:11824153-11825248	+	Chr08:11824153-11825248	+	-	-	-	-	-	-		PTHR35709 PTHR35709:SF1		AT2G05620	proton gradient regulation 5
Potri.013G080400	0	70.7883	7.14544	3.11454e-17	1.6912e-15	yes	Chr13:6954928-6957195	-	Chr13:6954928-6957195	-	-	-	-	-	GO:0003824/catalytic activity	GO:0009116/nucleoside metabolic process	PF01048	PTHR21234 PTHR21234:SF20	EC:3.2.2.9
Potri.019G056400	5.95857	80.7993	3.7613	3.12798e-17	1.69547e-15	yes	Chr19:9508433-9510159	-	Chr19:9508433-9510159	-	-	-	-	-	-	-	PF05349	PTHR36771		AT3G56290
Potri.014G096100	12.3003	98.5645	3.00238	3.20776e-17	1.73561e-15	yes	Chr14:6279340-6281163	+	Chr14:6279340-6281163	+	09180 Brite Hierarchies	09181 Protein families: metabolism	ko01003 Glycosyltransferases	-	GO:0016758/transferase activity, transferring hexosyl groups	GO:0008152/metabolic process	PF00201	PTHR11926 PTHR11926:SF189	EC:2.4.1.218	AT1G01390	UDP-Glycosyltransferase superfamily protein
Potri.005G193600	0	74.5393	7.85579	3.4482e-17	1.8624e-15	yes	Chr05:20105633-20107235	+	Chr05:20105633-20107235	+	-	-	-	-	-	GO:0006950/response to stress	PF02496	PTHR33801 PTHR33801:SF7
Potri.006G113500	34.6553	149.555	2.10953	3.74914e-17	2.02134e-15	yes	Chr06:8799277-8800279	-	Chr06:8799277-8800279	-	09120 Genetic Information Processing|09180 Brite Hierarchies	09122 Translation|09182 Protein families: genetic information processing	ko03010 Ribosome|ko03011 Ribosome	GO:0005840/ribosome|GO:0005622/intracellular	GO:0003735/structural constituent of ribosome	GO:0006412/translation	PF01196	PTHR14413		AT3G54210	Ribosomal protein L17 family protein
Potri.009G104600	3.28583	72.2061	4.45779	3.9995e-17	2.15251e-15	yes	Chr09:9168860-9170471	-	Chr09:9168860-9170471	-	-	-	-	-	GO:0016787/hydrolase activity	GO:0008152/metabolic process	PF07859	PTHR23024 PTHR23024:SF228	EC:3.1.1.1 EC:4.2.1.105
Potri.011G057800	44.2416	168.236	1.92701	4.99195e-17	2.6819e-15	yes	Chr11:4737331-4741383	-	Chr11:4737331-4741383	-	09180 Brite Hierarchies	09183 Protein families: signaling and cellular processes	ko02000 Transporters	GO:0016020/membrane	-	-	PF03151	PTHR11132 PTHR11132:SF102		AT5G46110	Glucose-6-phosphate/phosphate translocator-related
Potri.001G331600	33.6901	146.695	2.12242	5.57033e-17	2.98735e-15	yes	Chr01:34028807-34030764	+	Chr01:34028807-34030764	+	-	-	-	GO:0005840/ribosome|GO:0005622/intracellular	GO:0003735/structural constituent of ribosome	GO:0006412/translation	PF01165	PTHR21109 PTHR21109:SF0		AT3G27160	Ribosomal protein S21 family protein
Potri.005G234000	321.022	154.045	-1.05932	5.80448e-17	3.10744e-15	yes	Chr05:23243504-23245643	+	Chr05:23243504-23245643	+	09140 Cellular Processes|09150 Organismal Systems|09180 Brite Hierarchies	09141 Transport and catabolism|09143 Cell growth and death|09159 Environmental adaptation|09181 Protein families: metabolism	ko04142 Lysosome|ko04210 Apoptosis|ko04626 Plant-pathogen interaction|ko01002 Peptidases and inhibitors	-	GO:0008234/cysteine-type peptidase activity	GO:0006508/proteolysis	PF00112 PF08246	PTHR12411 PTHR12411:SF365	EC:3.4.22.41	AT4G16190	Papain family cysteine protease
Potri.003G207000	0	143.177	12.482	6.19192e-17	3.30903e-15	yes	Chr03:20620430-20621887	-	Chr03:20620430-20621887	-	-	-	-	-	GO:0005515/protein binding	-	PF00560 PF08263 PF13855	PTHR27000 PTHR27000:SF151	EC:3.5.1.98	AT3G20820	Leucine-rich repeat (LRR) family protein
Potri.010G132000	44.9565	169.136	1.91158	6.21077e-17	3.31328e-15	yes	Chr10:14820474-14821077	+	Chr10:14820474-14821077	+	-	-	-	-	-	-		PTHR35831 PTHR35831:SF2
Potri.011G074033	18.142	111.627	2.62128	7.40685e-17	3.94444e-15	yes	Chr11:7849498-7849815	+	Chr11:7849498-7849815	+	-	-	-	-	-	-
Potri.007G053400	139.616	36.8991	-1.91981	8.20778e-17	4.36332e-15	yes	Chr07:5347949-5349875	+	Chr07:5347949-5349875	+	09100 Metabolism	09110 Biosynthesis of other secondary metabolites	ko00940 Phenylpropanoid biosynthesis	-	GO:0020037/heme binding|GO:0004601/peroxidase activity	GO:0055114/oxidation-reduction process|GO:0006979/response to oxidative stress	PF00141	PTHR31517 PTHR31517:SF3	EC:1.11.1.7	AT3G49960	Peroxidase superfamily protein
Potri.007G145500	99.0185	16.472	-2.58768	8.24001e-17	4.37281e-15	yes	Chr07:15419951-15420262	+	Chr07:15419951-15420262	+	-	-	-	-	-	-		PTHR35485 PTHR35485:SF1		AT2G44010	(1 of 2) PTHR35485:SF1 - EXPRESSED PROTEIN
Potri.003G165700	83.8003	9.93128	-3.0769	8.32387e-17	4.40962e-15	yes	Chr03:17480489-17482354	+	Chr03:17480489-17482354	+	-	-	-	-	-	-	PF02893	PTHR31969 PTHR31969:SF3		AT5G13200	GRAM domain family protein
Potri.007G129700	202.26	74.0419	-1.4498	8.37759e-17	4.43036e-15	yes	Chr07:14413748-14417547	+	Chr07:14413748-14417547	+	09100 Metabolism	09101 Carbohydrate metabolism	ko00051 Fructose and mannose metabolism|ko00500 Starch and sucrose metabolism|ko00520 Amino sugar and nucleotide sugar metabolism	-	-	-	PF00294	PTHR10584 PTHR10584:SF168	EC:2.7.1.4	AT1G06020	pfkB-like carbohydrate kinase family protein
Potri.019G073900	12.783	98.0052	2.93864	8.62637e-17	4.554e-15	yes	Chr19:11542594-11545801	-	Chr19:11542594-11545801	-	-	-	-	-	-	-	PF13806	PTHR21496 PTHR21496:SF0	EC:1.14.12.22	AT1G71500	Rieske (2Fe-2S) domain-containing protein
Potri.016G019201	157.73	47.1843	-1.74108	9.04662e-17	4.76758e-15	yes	Chr16:1025227-1026485	-	Chr16:1025227-1026485	-	-	-	-	-	-	-	PF12734	PTHR31568 PTHR31568:SF17		AT1G05340	(1 of 5) PTHR31568:SF17 - EXPRESSED PROTEIN
Potri.013G046400	62.1697	0	-6.03079	9.25694e-17	4.86998e-15	yes	Chr13:3273967-3278326	+	Chr13:3273967-3278326	+	09100 Metabolism	09105 Amino acid metabolism	ko00260 Glycine, serine and threonine metabolism	-	GO:0016829/lyase activity|GO:0030170/pyridoxal phosphate binding|GO:0016740/transferase activity	GO:0009058/biosynthetic process|GO:0006520/cellular amino acid metabolic process	PF00155	PTHR10289 PTHR10289:SF5	EC:4.1.2.48 EC:4.1.2.5	AT1G08630	threonine aldolase 1
Potri.005G240700	85.2993	241.003	1.49844	1.07303e-16	5.63533e-15	yes	Chr05:23744666-23745632	+	Chr05:23744666-23745632	+	-	-	-	-	GO:0031072/heat shock protein binding	-	PF00226	PTHR24078
Potri.001G455000	35.9555	149.812	2.05887	1.13961e-16	5.97472e-15	yes	Chr01:48142761-48147778	+	Chr01:48142761-48147778	+	09180 Brite Hierarchies	09183 Protein families: signaling and cellular processes	ko02000 Transporters	GO:0016020/membrane	GO:0005215/transporter activity	GO:0006810/transport	PF00230	PTHR19139 PTHR19139:SF102		AT4G10380	NOD26-like intrinsic protein 5;1
Potri.019G063201	93.7077	0	-10.2818	1.20516e-16	6.30748e-15	yes	Chr19:10326386-10328055	-	Chr19:10326386-10328055	-	09100 Metabolism	09110 Biosynthesis of other secondary metabolites	ko00940 Phenylpropanoid biosynthesis	-	-	-	PF00141	PTHR31235 PTHR31235:SF17	EC:1.11.1.7	AT3G01190	Peroxidase superfamily protein
Potri.009G005400	10.3493	90.8783	3.1344	1.25091e-16	6.5357e-15	yes	Chr09:1176906-1178404	+	Chr09:1176906-1178404	+	09180 Brite Hierarchies	09183 Protein families: signaling and cellular processes	ko02000 Transporters	GO:0016020/membrane	GO:0005215/transporter activity	GO:0006810/transport	PF00230	PTHR19139 PTHR19139:SF52
Potri.003G111300	82.2034	9.75886	-3.07441	1.66703e-16	8.69487e-15	yes	Chr03:13356444-13357576	+	Chr03:13356444-13357576	+	-	-	-	-	-	-	PF14547	PTHR31731 PTHR31731:SF25		AT1G62500	Bifunctional inhibitor/lipid-transfer protein/seed storage 2S albumin superfamily protein
Potri.001G118400	3.6199	70.7353	4.28841	1.68438e-16	8.7703e-15	yes	Chr01:9629071-9631249	-	Chr01:9629071-9631249	-	-	-	-	-	GO:0020037/heme binding|GO:0009055/electron transfer activity|GO:0016705/oxidoreductase activity, acting on paired donors, with incorporation or reduction of molecular oxygen	GO:0055114/oxidation-reduction process	PF00067	PTHR24298 PTHR24298:SF136
Potri.006G019200	253.12	108.778	-1.21844	1.81016e-16	9.4091e-15	yes	Chr06:1218364-1219759	-	Chr06:1218364-1219759	-	-	-	-	-	GO:0046872/metal ion binding	GO:0030001/metal ion transport	PF00403	PTHR22814 PTHR22814:SF79		AT4G16380	Heavy metal transport/detoxification superfamily protein
Potri.016G036900	5.27403	75.6302	3.84198	1.86347e-16	9.66967e-15	yes	Chr16:2205959-2223030	+	Chr16:2205959-2223030	+	09100 Metabolism|09180 Brite Hierarchies	09101 Carbohydrate metabolism|09102 Energy metabolism|09181 Protein families: metabolism	ko00630 Glyoxylate and dicarboxylate metabolism|ko00910 Nitrogen metabolism|ko01002 Peptidases and inhibitors	-	-	GO:0055114/oxidation-reduction process|GO:0006537/glutamate biosynthetic process|GO:0006807/nitrogen compound metabolic process	PF00310 PF01493 PF01645 PF04898|PF00310 PF01493 PF01645 PF04898|PF00310 PF01493 PF01645 PF04898	PTHR11938 PTHR11938:SF94|PTHR11938 PTHR11938:SF94|PTHR11938 PTHR11938:SF94	EC:1.4.7.1|EC:1.4.7.1|EC:1.4.7.1	AT5G04140|AT5G04140|AT5G04140	glutamate synthase 1|glutamate synthase 1|glutamate synthase 1
Potri.001G171600	93.3903	14.7013	-2.66733	2.13202e-16	1.10444e-14	yes	Chr01:14747733-14749210	+	Chr01:14747733-14749210	+	-	-	-	-	-	-	PF12681	PTHR10374 PTHR10374:SF18		AT1G15380	Lactoylglutathione lyase / glyoxalase I family protein
Potri.012G070600	1.35775	64.2951	5.56542	2.17511e-16	1.12484e-14	yes	Chr12:9275472-9276553	+	Chr12:9275472-9276553	+	-	-	-	-	-	-	PF06549	PTHR31425 PTHR31425:SF3		AT1G74730	Protein of unknown function (DUF1118)
Potri.001G088300	9.77012	88.2366	3.17493	2.25791e-16	1.16568e-14	yes	Chr01:7022912-7024813	+	Chr01:7022912-7024813	+	09120 Genetic Information Processing|09180 Brite Hierarchies	09122 Translation|09182 Protein families: genetic information processing	ko03010 Ribosome|ko03011 Ribosome|ko03029 Mitochondrial biogenesis	GO:0005840/ribosome	GO:0019843/rRNA binding|GO:0003735/structural constituent of ribosome	GO:0006412/translation	PF01250	PTHR21011 PTHR21011:SF1		AT1G64510	Translation elongation factor EF1B/ribosomal protein S6 family protein
Potri.009G163200	14.1787	99.7063	2.81396	2.34884e-16	1.21057e-14	yes	Chr09:12535403-12537739	-	Chr09:12535403-12537739	-	09140 Cellular Processes|09150 Organismal Systems|09160 Human Diseases	09141 Transport and catabolism|09149 Aging|09164 Neurodegenerative disease	ko04146 Peroxisome|ko04213 Longevity regulating pathway - multiple species|ko05014 Amyotrophic lateral sclerosis (ALS)|ko05016 Huntington disease|ko05020 Prion diseases	GO:0015934/large ribosomal subunit	GO:0003735/structural constituent of ribosome	GO:0006412/translation	PF01783	PTHR36083 PTHR36083:SF1	EC:1.15.1.1
Potri.009G047700	29.062	133.729	2.20211	2.52502e-16	1.29917e-14	yes	Chr09:5333483-5341246	-	Chr09:5333483-5341246	-	09100 Metabolism|09140 Cellular Processes|09180 Brite Hierarchies	09101 Carbohydrate metabolism|09102 Energy metabolism|09105 Amino acid metabolism|09141 Transport and catabolism|09181 Protein families: metabolism	ko00630 Glyoxylate and dicarboxylate metabolism|ko00680 Methane metabolism|ko00250 Alanine, aspartate and glutamate metabolism|ko00260 Glycine, serine and threonine metabolism|ko04146 Peroxisome|ko01007 Amino acid related enzymes	-	-	GO:0008152/metabolic process	PF00266|PF00266|PF00266	PTHR21152 PTHR21152:SF21|PTHR21152 PTHR21152:SF21|PTHR21152 PTHR21152:SF21	EC:2.6.1.44 EC:2.6.1.45 EC:2.6.1.51|EC:2.6.1.44 EC:2.6.1.45 EC:2.6.1.51|EC:2.6.1.44 EC:2.6.1.45 EC:2.6.1.51	AT2G13360|AT2G13360|AT2G13360	alanine:glyoxylate aminotransferase|alanine:glyoxylate aminotransferase|alanine:glyoxylate aminotransferase
Potri.013G160600	0	65.0624	6.70139	2.58715e-16	1.32888e-14	yes	Chr13:15472982-15474294	+	Chr13:15472982-15474294	+	-	-	-	GO:0016020/membrane	GO:0016655/oxidoreductase activity, acting on NAD(P)H, quinone or similar compound as acceptor	GO:0055114/oxidation-reduction process	PF11909	PTHR35515 PTHR35515:SF1		AT5G58260	oxidoreductases, acting on NADH or NADPH, quinone or similar compound as acceptor
Potri.014G116000	65.992	3.86202	-4.09486	2.65589e-16	1.36189e-14	yes	Chr14:7809084-7813718	-	Chr14:7809084-7813718	-	-	-	-	GO:0016021/integral component of membrane|GO:0016020/membrane	GO:0005452/inorganic anion exchanger activity	GO:0006820/anion transport	PF00955	PTHR11453 PTHR11453:SF44		AT2G47160	HCO3- transporter family
Potri.012G077300	23.4478	121.239	2.37033	2.83675e-16	1.44974e-14	yes	Chr12:10091059-10092353	-	Chr12:10091059-10092353	-	-	-	-	-	-	-	PF14009	PTHR33413 PTHR33413:SF5		AT5G50090	(1 of 28) PF14009 - Domain of unknown function (DUF4228) (DUF4228)
Potri.018G026500	5.77268	76.2719	3.72384	3.05726e-16	1.55982e-14	yes	Chr18:1958328-1961567	-	Chr18:1958328-1961567	-	09100 Metabolism|09180 Brite Hierarchies	09102 Energy metabolism|09181 Protein families: metabolism	ko00190 Oxidative phosphorylation|ko00195 Photosynthesis|ko00194 Photosynthesis proteins	GO:0045263/proton-transporting ATP synthase complex, coupling factor F(o)	GO:0015078/proton transmembrane transporter activity	GO:0015986/ATP synthesis coupled proton transport	PF00430	PTHR33445		AT4G32260	ATPase, F0 complex, subunit B/B', bacterial/chloroplast
Potri.007G015500	1.68258	64.0954	5.25147	3.30356e-16	1.67984e-14	yes	Chr07:1147709-1149992	-	Chr07:1147709-1149992	-	09100 Metabolism|09130 Environmental Information Processing|09180 Brite Hierarchies	09101 Carbohydrate metabolism|09102 Energy metabolism|09132 Signal transduction|09182 Protein families: genetic information processing|09183 Protein families: signaling and cellular processes	ko00010 Glycolysis / Gluconeogenesis|ko00030 Pentose phosphate pathway|ko00051 Fructose and mannose metabolism|ko00710 Carbon fixation in photosynthetic organisms|ko00680 Methane metabolism|ko04066 HIF-1 signaling pathway|ko04131 Membrane trafficking|ko03036 Chromosome and associated proteins|ko04147 Exosome	-	GO:0004332/fructose-bisphosphate aldolase activity	GO:0006096/glycolytic process	PF00274	PTHR11627 PTHR11627:SF16	EC:4.1.2.13	AT2G21330	fructose-bisphosphate aldolase 1
Potri.015G024200	114.607	25.2131	-2.18445	3.39449e-16	1.7232e-14	yes	Chr15:1806862-1808029	+	Chr15:1806862-1808029	+	09100 Metabolism	09101 Carbohydrate metabolism	ko00520 Amino sugar and nucleotide sugar metabolism	-	GO:0004553/hydrolase activity, hydrolyzing O-glycosyl compounds	GO:0005975/carbohydrate metabolic process	PF00704	PTHR11177	EC:3.2.1.14 EC:3.2.1.17	AT5G24090	chitinase A
Potri.008G088800	122.785	29.5641	-2.05422	3.89714e-16	1.97507e-14	yes	Chr08:5555917-5558557	+	Chr08:5555917-5558557	+	-	-	-	-	-	-	PF06127	PTHR28026 PTHR28026:SF4		AT1G74440	Protein of unknown function (DUF962)
Potri.014G030700	18.1464	108.282	2.57705	4.17851e-16	2.11415e-14	yes	Chr14:1926023-1926536	+	Chr14:1926023-1926536	+	-	-	-	-	-	-	PF00036		EC:2.7.11.1
Potri.004G086500	0	83.702	9.53028	4.52369e-16	2.28499e-14	yes	Chr04:7262855-7263728	+	Chr04:7262855-7263728	+	-	-	-	-	-	-	PF00234	PTHR33076 PTHR33076:SF14		AT2G15050	lipid transfer protein
Potri.018G002900	91.2889	246.514	1.43316	5.7634e-16	2.90636e-14	yes	Chr18:201243-203864	+	Chr18:201243-203864	+	-	-	-	-	-	-	PF04752|PF04752	PTHR12192 PTHR12192:SF10|PTHR12192 PTHR12192:SF10		AT4G31290|AT4G31290	ChaC-like family protein|ChaC-like family protein
Potri.007G016400	110.062	23.475	-2.22912	5.99024e-16	3.01575e-14	yes	Chr07:1198407-1200807	-	Chr07:1198407-1200807	-	09100 Metabolism|09180 Brite Hierarchies	09110 Biosynthesis of other secondary metabolites|09181 Protein families: metabolism	ko00940 Phenylpropanoid biosynthesis|ko00199 Cytochrome P450	-	GO:0020037/heme binding|GO:0009055/electron transfer activity|GO:0016705/oxidoreductase activity, acting on paired donors, with incorporation or reduction of molecular oxygen	GO:0055114/oxidation-reduction process	PF00067	PTHR24298 PTHR24298:SF73		AT4G36220	ferulic acid 5-hydroxylase 1
Potri.011G082400	16.105	102.691	2.67273	5.99687e-16	3.0141e-14	yes	Chr11:8959507-8960985	-	Chr11:8959507-8960985	-	-	-	-	-	-	-	PF12697	PTHR10992 PTHR10992:SF820
Potri.013G009800	202.612	77.3752	-1.38878	6.12242e-16	3.07212e-14	yes	Chr13:633314-634870	-	Chr13:633314-634870	-	-	-	-	-	-	GO:0006950/response to stress	PF00582	PTHR31964 PTHR31964:SF28
Potri.001G115200	60.1661	2.19178	-4.77878	6.44359e-16	3.22264e-14	yes	Chr01:9331248-9333072	-	Chr01:9331248-9333072	-	-	-	-	-	-	-	PF03479	PTHR31100 PTHR31100:SF15		AT4G22810	Predicted AT-hook DNA-binding family protein
Potri.013G159000	24.9942	122.599	2.29428	7.78392e-16	3.88659e-14	yes	Chr13:15343729-15346904	-	Chr13:15343729-15346904	-	-	-	-	-	GO:0004871/signal transducer activity	GO:0009416/response to light stimulus	PF00651 PF03000|PF00651 PF03000	PTHR32370 PTHR32370:SF17|PTHR32370 PTHR32370:SF17		AT2G30520|AT2G30520	Phototropic-responsive NPH3 family protein|Phototropic-responsive NPH3 family protein
Potri.018G146100	149.655	45.215	-1.72677	7.79058e-16	3.88354e-14	yes	Chr18:15050062-15052110	+	Chr18:15050062-15052110	+	09100 Metabolism|09180 Brite Hierarchies	09108 Metabolism of cofactors and vitamins|09110 Biosynthesis of other secondary metabolites|09181 Protein families: metabolism	ko00130 Ubiquinone and other terpenoid-quinone biosynthesis|ko00940 Phenylpropanoid biosynthesis|ko00945 Stilbenoid, diarylheptanoid and gingerol biosynthesis|ko00941 Flavonoid biosynthesis|ko00199 Cytochrome P450	-	GO:0020037/heme binding|GO:0009055/electron transfer activity|GO:0016705/oxidoreductase activity, acting on paired donors, with incorporation or reduction of molecular oxygen	GO:0055114/oxidation-reduction process	PF00067	PTHR24298 PTHR24298:SF149	EC:1.14.13.11
Potri.009G107350	60.4625	2.44697	-4.62698	7.82694e-16	3.89528e-14	yes	Chr09:9336190-9336696	-	Chr09:9336190-9336696	-	-	-	-	-	-	-	PF14226	PTHR10209 PTHR10209:SF98	EC:1.14.11.9
Potri.014G102100	17.3659	105.176	2.59848	7.96481e-16	3.95742e-14	yes	Chr14:6758778-6759840	-	Chr14:6758778-6759840	-	09100 Metabolism|09180 Brite Hierarchies	09102 Energy metabolism|09181 Protein families: metabolism	ko00190 Oxidative phosphorylation|ko00195 Photosynthesis|ko00194 Photosynthesis proteins	GO:0045261/proton-transporting ATP synthase complex, catalytic core F(1)|GO:0005886/plasma membrane	GO:0046933/proton-transporting ATP synthase activity, rotational mechanism	GO:0015986/ATP synthesis coupled proton transport	PF00213	PTHR11910 PTHR11910:SF8
Potri.004G011525	63.24	197.024	1.63946	8.24245e-16	4.08868e-14	yes	Chr04:701413-702584	-	Chr04:701413-702584	-	09100 Metabolism	09102 Energy metabolism	ko00920 Sulfur metabolism	-	-	-	PF00085 PF01507	PTHR23293 PTHR23293:SF11	EC:1.8.4.9
Potri.001G011300	63.5095	3.69062	-4.10504	9.14044e-16	4.52675e-14	yes	Chr01:731547-733144	-	Chr01:731547-733144	-	09100 Metabolism	09110 Biosynthesis of other secondary metabolites	ko00940 Phenylpropanoid biosynthesis	-	GO:0020037/heme binding|GO:0004601/peroxidase activity	GO:0055114/oxidation-reduction process|GO:0006979/response to oxidative stress	PF00141	PTHR31388 PTHR31388:SF22	EC:1.11.1.7	AT2G38380	Peroxidase superfamily protein
Potri.010G254700	12.9134	93.9349	2.8628	9.28015e-16	4.58847e-14	yes	Chr10:22573102-22580554	-	Chr10:22573102-22580554	-	09100 Metabolism|09160 Human Diseases	09101 Carbohydrate metabolism|09102 Energy metabolism|09105 Amino acid metabolism|09106 Metabolism of other amino acids|09108 Metabolism of cofactors and vitamins|09176 Drug resistance: antineoplastic	ko00630 Glyoxylate and dicarboxylate metabolism|ko00680 Methane metabolism|ko00260 Glycine, serine and threonine metabolism|ko00460 Cyanoamino acid metabolism|ko00670 One carbon pool by folate|ko01523 Antifolate resistance	-	GO:0004372/glycine hydroxymethyltransferase activity|GO:0016829/lyase activity	GO:0006544/glycine metabolic process|GO:0006563/L-serine metabolic process|GO:0006520/cellular amino acid metabolic process	PF00464	PTHR11680 PTHR11680:SF8	EC:2.1.2.1	AT4G37930	serine transhydroxymethyltransferase 1
Potri.017G107500	23.1992	118.23	2.34945	9.50257e-16	4.69081e-14	yes	Chr17:11638205-11640308	-	Chr17:11638205-11640308	-	-	-	-	GO:0005622/intracellular	GO:0005515/protein binding|GO:0008270/zinc ion binding	-	PF00643 PF06203	PTHR31319 PTHR31319:SF10		AT5G15840	B-box type zinc finger protein with CCT domain
Potri.009G013900	57.6772	1.29024	-5.48229	1.08674e-15	5.35587e-14	yes	Chr09:2380465-2382421	-	Chr09:2380465-2382421	-	09180 Brite Hierarchies	09183 Protein families: signaling and cellular processes	ko02000 Transporters	GO:0016020/membrane	GO:0005215/transporter activity	GO:0006810/transport	PF00230	PTHR19139 PTHR19139:SF158		AT5G60660	plasma membrane intrinsic protein 2;4
Potri.013G032900	36.9143	146.602	1.98966	1.16695e-15	5.74186e-14	yes	Chr13:2118553-2120232	-	Chr13:2118553-2120232	-	-	-	-	-	-	-
Potri.006G038100	57.493	0	-5.92356	1.22139e-15	6.00002e-14	yes	Chr06:2497186-2497392	+	Chr06:2497186-2497392	+	-	-	-	-	-	-
Potri.011G006050	195.77	74.3801	-1.39617	1.47854e-15	7.25152e-14	yes	Chr11:505960-507747	+	Chr11:505960-507747	+	-	-	-	-	-	-	PF02362			AT3G53310|AT3G53310	AP2/B3-like transcriptional factor family protein|AP2/B3-like transcriptional factor family protein
Potri.015G143600	72.4288	7.36167	-3.29846	1.56956e-15	7.68555e-14	yes	Chr15:14900244-14902489	-	Chr15:14900244-14902489	-	-	-	-	-	-	-	PF03763 PF03766	PTHR31775		AT5G23750	Remorin family protein
Potri.011G099400	93.4652	16.3498	-2.51516	1.57576e-15	7.70348e-14	yes	Chr11:12825643-12829115	+	Chr11:12825643-12829115	+	-	-	-	-	GO:0020037/heme binding|GO:0009055/electron transfer activity|GO:0016705/oxidoreductase activity, acting on paired donors, with incorporation or reduction of molecular oxygen	GO:0055114/oxidation-reduction process	PF00067	PTHR24282 PTHR24282:SF53	EC:1.14.13.173	AT3G14630	cytochrome P450, family 72, subfamily A, polypeptide 9
Potri.009G129500	9.70604	84.2391	3.11754	1.87804e-15	9.16653e-14	yes	Chr09:10594232-10597731	-	Chr09:10594232-10597731	-	09100 Metabolism|09180 Brite Hierarchies	09101 Carbohydrate metabolism|09102 Energy metabolism|09183 Protein families: signaling and cellular processes	ko00010 Glycolysis / Gluconeogenesis|ko00051 Fructose and mannose metabolism|ko00562 Inositol phosphate metabolism|ko00710 Carbon fixation in photosynthetic organisms|ko04147 Exosome	-	GO:0004807/triose-phosphate isomerase activity	GO:0008152/metabolic process	PF00121	PTHR21139 PTHR21139:SF7	EC:5.3.1.1	AT2G21170	triosephosphate isomerase
Potri.014G089700	90.2514	15.0632	-2.58292	1.97515e-15	9.62505e-14	yes	Chr14:5824799-5827467	+	Chr14:5824799-5827467	+	-	-	-	-	GO:0046872/metal ion binding	GO:0030001/metal ion transport	PF00403	PTHR22814 PTHR22814:SF77		AT1G01490	Heavy metal transport/detoxification superfamily protein
Potri.016G135400	0	69.8491	8.45047	2.28065e-15	1.10783e-13	yes	Chr16:13958495-13959382	+	Chr16:13958495-13959382	+	-	-	-	-	-	-	PF00234	PTHR33076 PTHR33076:SF20		AT2G15050	lipid transfer protein
Potri.002G154600	11.8443	89.474	2.91728	2.34527e-15	1.1374e-13	yes	Chr02:11801803-11804433	-	Chr02:11801803-11804433	-	09120 Genetic Information Processing|09180 Brite Hierarchies	09122 Translation|09182 Protein families: genetic information processing	ko03010 Ribosome|ko03011 Ribosome	GO:0005840/ribosome|GO:0005622/intracellular	GO:0003735/structural constituent of ribosome	GO:0006412/translation	PF00281 PF00673	PTHR11994 PTHR11994:SF4		AT4G01310	Ribosomal L5P family protein
Potri.002G048000	124.19	32.2491	-1.94522	2.39038e-15	1.15743e-13	yes	Chr02:3182020-3185288	-	Chr02:3182020-3185288	-	-	-	-	-	-	-	PF12171	PTHR10593 PTHR10593:SF20		AT4G02670	indeterminate(ID)-domain 12
Potri.010G211600	69.5888	205.473	1.56202	2.42795e-15	1.17375e-13	yes	Chr10:20020591-20025499	-	Chr10:20020591-20025499	-	-	-	-	-	GO:0005515/protein binding	-	PF13410 PF13417	PTHR11260 PTHR11260:SF171	EC:1.8.5.1
Potri.004G188600	216.699	435.337	1.00644	2.44844e-15	1.18178e-13	yes	Chr04:20130592-20131912	+	Chr04:20130592-20131912	+	-	-	-	-	-	-		PTHR33270 PTHR33270:SF3		AT2G27830	(1 of 1) PTHR33270:SF3 - EXPRESSED PROTEIN
Potri.004G187500	0	74.8223	9.07316	2.54412e-15	1.22601e-13	yes	Chr04:20033690-20034473	+	Chr04:20033690-20034473	+	-	-	-	-	-	-	PF07876	PTHR33178 PTHR33178:SF4		AT5G22580	Stress responsive A/B Barrel Domain
Potri.002G156600	59.2519	2.77671	-4.41541	2.74063e-15	1.31862e-13	yes	Chr02:11935659-11938137	+	Chr02:11935659-11938137	+	09100 Metabolism	09109 Metabolism of terpenoids and polyketides	ko00902 Monoterpenoid biosynthesis	-	GO:0016491/oxidoreductase activity	GO:0008152/metabolic process	PF00106|PF00106	PTHR24322 PTHR24322:SF442|PTHR24322 PTHR24322:SF442	EC:1.1.1.208
Potri.018G126400	67.7432	5.93328	-3.51317	2.81318e-15	1.35139e-13	yes	Chr18:13762294-13765761	+	Chr18:13762294-13765761	+	09100 Metabolism	09101 Carbohydrate metabolism	ko00052 Galactose metabolism	-	-	-	PF05691|PF05691|PF05691	PTHR31268 PTHR31268:SF5|PTHR31268 PTHR31268:SF5|PTHR31268 PTHR31268:SF5	EC:2.4.1.82|EC:2.4.1.82|EC:2.4.1.82	AT5G20250|AT5G20250|AT5G20250	Raffinose synthase family protein|Raffinose synthase family protein|Raffinose synthase family protein
Potri.007G108500	63.0602	4.20771	-3.90562	2.86957e-15	1.37631e-13	yes	Chr07:13081390-13083829	-	Chr07:13081390-13083829	-	09100 Metabolism	09101 Carbohydrate metabolism|09103 Lipid metabolism|09105 Amino acid metabolism	ko00010 Glycolysis / Gluconeogenesis|ko00071 Fatty acid degradation|ko00592 alpha-Linolenic acid metabolism|ko00350 Tyrosine metabolism	-	GO:0008270/zinc ion binding|GO:0016491/oxidoreductase activity	GO:0055114/oxidation-reduction process	PF00107 PF08240	PTHR11695 PTHR11695:SF576	EC:1.1.1.1	AT1G77120	alcohol dehydrogenase 1
Potri.008G161600	14.0673	94.6375	2.75006	2.99038e-15	1.42974e-13	yes	Chr08:11117761-11119846	-	Chr08:11117761-11119846	-	09190 Not Included in Pathway or Brite	09191 Unclassified: metabolism	ko99980 Enzymes with EC numbers	-	GO:0008270/zinc ion binding|GO:0016491/oxidoreductase activity	GO:0055114/oxidation-reduction process	PF08240 PF13602	PTHR11695 PTHR11695:SF530	EC:1.3.1.105 EC:1.3.1.74
Potri.018G063200	38.9926	148.468	1.92888	3.16834e-15	1.51245e-13	yes	Chr18:7405087-7407321	-	Chr18:7405087-7407321	-	09180 Brite Hierarchies	09182 Protein families: genetic information processing	ko03110 Chaperones and folding catalysts|ko03029 Mitochondrial biogenesis	GO:0005737/cytoplasm	-	GO:0006457/protein folding	PF00166|PF00166	PTHR10772 PTHR10772:SF0|PTHR10772 PTHR10772:SF0		AT5G20720|AT5G20720	chaperonin 20|chaperonin 20
Potri.006G221900	2.63528	62.5643	4.56931	3.35041e-15	1.59685e-13	yes	Chr06:22738075-22739638	-	Chr06:22738075-22739638	-	-	-	-	-	GO:0031072/heat shock protein binding	-				AT5G21430	Chaperone DnaJ-domain superfamily protein
Potri.001G190700	71.8809	208.596	1.53703	3.3734e-15	1.6053e-13	yes	Chr01:17399555-17400811	-	Chr01:17399555-17400811	-	-	-	-	-	-	-		PTHR33172 PTHR33172:SF2		AT5G56550	oxidative stress 3
Potri.015G053800	14.3931	94.9012	2.72105	3.97685e-15	1.8895e-13	yes	Chr15:7155820-7157877	-	Chr15:7155820-7157877	-	-	-	-	-	-	-		PTHR36004 PTHR36004:SF1		AT1G73885
Potri.009G095100	0	60.0954	6.82897	4.20573e-15	1.99513e-13	yes	Chr09:8583595-8585444	-	Chr09:8583595-8585444	-	-	-	-	-	GO:0016758/transferase activity, transferring hexosyl groups	GO:0008152/metabolic process	PF00201	PTHR11926 PTHR11926:SF167		AT4G15500	UDP-Glycosyltransferase superfamily protein
Potri.019G056700	147.919	46.5466	-1.66806	4.86783e-15	2.30204e-13	yes	Chr19:9556673-9563487	+	Chr19:9556673-9563487	+	09100 Metabolism	09101 Carbohydrate metabolism|09103 Lipid metabolism|09107 Glycan biosynthesis and metabolism	ko00052 Galactose metabolism|ko00561 Glycerolipid metabolism|ko00600 Sphingolipid metabolism|ko00603 Glycosphingolipid biosynthesis - globo and isoglobo series	-	GO:0004553/hydrolase activity, hydrolyzing O-glycosyl compounds	GO:0005975/carbohydrate metabolic process	PF16499	PTHR11452 PTHR11452:SF33	EC:3.2.1.22	AT3G56310	Melibiase family protein
Potri.010G011300	105.505	23.222	-2.18374	5.02661e-15	2.37344e-13	yes	Chr10:2027141-2033331	-	Chr10:2027141-2033331	-	09100 Metabolism	09101 Carbohydrate metabolism|09105 Amino acid metabolism	ko00640 Propanoate metabolism|ko00280 Valine, leucine and isoleucine degradation	-	GO:0048037/cofactor binding|GO:0008415/transferase activity, transferring acyl groups|GO:0016746/transferase activity, transferring acyl groups	GO:0008152/metabolic process	PF00198 PF00364 PF02817	PTHR23151 PTHR23151:SF71	EC:2.3.1.168	AT3G06850	2-oxoacid dehydrogenases acyltransferase family protein
Potri.001G071000	31.7513	132.821	2.0646	5.28697e-15	2.4925e-13	yes	Chr01:5372569-5375237	+	Chr01:5372569-5375237	+	09190 Not Included in Pathway or Brite	09191 Unclassified: metabolism	ko99980 Enzymes with EC numbers	GO:0048046/apoplast|GO:0005618/cell wall	GO:0016762/xyloglucan:xyloglucosyl transferase activity|GO:0004553/hydrolase activity, hydrolyzing O-glycosyl compounds	GO:0006073/cellular glucan metabolic process|GO:0005975/carbohydrate metabolic process	PF00722 PF06955|PF00722 PF06955	PTHR31062 PTHR31062:SF15|PTHR31062 PTHR31062:SF15	EC:2.4.1.207|EC:2.4.1.207
Potri.002G018300	17.46	101.613	2.54095	5.56725e-15	2.62057e-13	yes	Chr02:1100794-1103554	-	Chr02:1100794-1103554	-	09100 Metabolism	09110 Biosynthesis of other secondary metabolites	ko00940 Phenylpropanoid biosynthesis	-	GO:0008270/zinc ion binding|GO:0016491/oxidoreductase activity	GO:0055114/oxidation-reduction process	PF00107 PF08240	PTHR11695 PTHR11695:SF608
Potri.005G193901	60.1949	0	-7.6783	5.92809e-15	2.78611e-13	yes	Chr05:20127687-20129009	+	Chr05:20127687-20129009	+	-	-	-	-	-	-	PF02496|PF02496	PTHR33801 PTHR33801:SF7|PTHR33801 PTHR33801:SF7
Potri.013G128200	42.5059	153.672	1.85412	6.38022e-15	2.98936e-13	yes	Chr13:13543774-13545469	+	Chr13:13543774-13545469	+	09120 Genetic Information Processing|09180 Brite Hierarchies	09122 Translation|09182 Protein families: genetic information processing	ko03010 Ribosome|ko03011 Ribosome|ko03029 Mitochondrial biogenesis	GO:0005840/ribosome|GO:0005622/intracellular	GO:0003735/structural constituent of ribosome	GO:0006412/translation	PF00886	PTHR12919 PTHR12919:SF23
Potri.017G111150	13.0095	90.3161	2.79542	7.31835e-15	3.42364e-13	yes	Chr17:11892318-11893371	+	Chr17:11892318-11893371	+	-	-	-	-	-	-		PTHR34023
Potri.013G135500	24.3331	116.49	2.25921	7.4476e-15	3.47875e-13	yes	Chr13:14057341-14060341	-	Chr13:14057341-14060341	-	09100 Metabolism	09108 Metabolism of cofactors and vitamins	ko00860 Porphyrin and chlorophyll metabolism	-	GO:0016491/oxidoreductase activity	GO:0008152/metabolic process	PF00106	PTHR24322 PTHR24322:SF393	EC:1.3.1.33 EC:1.6.99.1	AT1G03630	protochlorophyllide oxidoreductase C
Potri.017G087200	258.772	120.007	-1.10856	7.82475e-15	3.64931e-13	yes	Chr17:10040626-10044004	-	Chr17:10040626-10044004	-	-	-	-	-	-	-		PTHR33971 PTHR33971:SF1		AT5G39570	(1 of 2) PTHR33971:SF1 - GENOMIC DNA, CHROMOSOME 3, P1 CLONE:MRI12
Potri.003G134600	88.9187	235.12	1.40284	7.98608e-15	3.71885e-13	yes	Chr03:15262928-15263741	-	Chr03:15262928-15263741	-	-	-	-	-	-	-	PF03018	PTHR21495 PTHR21495:SF70
Potri.011G087200	65.0792	194.34	1.57832	8.30902e-15	3.86331e-13	yes	Chr11:11095358-11098637	+	Chr11:11095358-11098637	+	09100 Metabolism	09101 Carbohydrate metabolism	ko00053 Ascorbate and aldarate metabolism	-	-	-		PTHR20884 PTHR20884:SF10	EC:2.7.7.69	AT4G26850	mannose-1-phosphate guanylyltransferase (GDP)s;GDP-galactose:mannose-1-phosphate guanylyltransferases;GDP-galactose:glucose-1-phosphate guanylyltransferases;GDP-galactose:myoinositol-1-phosphate guanylyltransferases;glucose-1-phosphate guanylyltransferase
Potri.014G126000	0	57.2464	6.00571	8.73676e-15	4.05599e-13	yes	Chr14:8455368-8456405	-	Chr14:8455368-8456405	-	-	-	-	-	-	-	PF04674	PTHR31279 PTHR31279:SF16
Potri.018G065300	12.8396	89.5387	2.80191	8.82553e-15	4.09096e-13	yes	Chr18:7800677-7804764	-	Chr18:7800677-7804764	-	09120 Genetic Information Processing|09180 Brite Hierarchies	09124 Replication and repair|09182 Protein families: genetic information processing	ko03030 DNA replication|ko03420 Nucleotide excision repair|ko03430 Mismatch repair|ko03440 Homologous recombination|ko03460 Fanconi anemia pathway|ko03000 Transcription factors|ko03032 DNA replication proteins|ko03400 DNA repair and recombination proteins	GO:0005634/nucleus	GO:0003677/DNA binding	GO:0006260/DNA replication	PF01336 PF04057 PF08646 PF16900	PTHR23273 PTHR23273:SF15		AT2G06510	replication protein A 1A
Potri.002G044300	18.1459	102.281	2.49483	8.93649e-15	4.13609e-13	yes	Chr02:2892530-2893203	+	Chr02:2892530-2893203	+	09100 Metabolism|09180 Brite Hierarchies	09102 Energy metabolism|09181 Protein families: metabolism	ko00195 Photosynthesis|ko00194 Photosynthesis proteins	GO:0009507/chloroplast|GO:0009523/photosystem II	-	GO:0015979/photosynthesis	PF07123	PTHR34552		AT2G30570	photosystem II reaction center W
Potri.004G138200	10.95	84.6444	2.95049	9.15921e-15	4.23272e-13	yes	Chr04:16003305-16006383	-	Chr04:16003305-16006383	-	09180 Brite Hierarchies	09182 Protein families: genetic information processing	ko04131 Membrane trafficking	-	-	-	PF00650 PF03765	PTHR23324 PTHR23324:SF48		AT1G22530	PATELLIN 2
Potri.016G078300	124.953	34.1936	-1.86959	9.29704e-15	4.2899e-13	yes	Chr16:5938989-5943138	+	Chr16:5938989-5943138	+	09100 Metabolism	09110 Biosynthesis of other secondary metabolites	ko00940 Phenylpropanoid biosynthesis	-	GO:0016616/oxidoreductase activity, acting on the CH-OH group of donors, NAD or NADP as acceptor|GO:0048037/cofactor binding|GO:0008270/zinc ion binding|GO:0016491/oxidoreductase activity	GO:0055114/oxidation-reduction process	PF00107 PF08240	PTHR11695 PTHR11695:SF497	EC:1.1.1.195	AT4G37970	cinnamyl alcohol dehydrogenase 6
Potri.001G091300	25.6405	118.815	2.21222	9.41258e-15	4.33663e-13	yes	Chr01:7219903-7220875	+	Chr01:7219903-7220875	+	-	-	-	-	-	-	PF11623	PTHR35494 PTHR35494:SF1		AT4G23890	(1 of 1) PF11623 - Protein of unknown function (DUF3252) (DUF3252)
Potri.001G191400	4.70657	67.0289	3.83203	9.84748e-15	4.53014e-13	yes	Chr01:17541884-17545088	+	Chr01:17541884-17545088	+	-	-	-	-	GO:0016788/hydrolase activity, acting on ester bonds	GO:0006629/lipid metabolic process	PF00657|PF00657|PF00657	PTHR22835 PTHR22835:SF170|PTHR22835 PTHR22835:SF170|PTHR22835 PTHR22835:SF170	EC:3.1.1.3|EC:3.1.1.3|EC:3.1.1.3	AT3G16370|AT3G16370|AT3G16370	GDSL-like Lipase/Acylhydrolase superfamily protein|GDSL-like Lipase/Acylhydrolase superfamily protein|GDSL-like Lipase/Acylhydrolase superfamily protein
Potri.002G022600	4.85884	67.3716	3.79346	1.05384e-14	4.84068e-13	yes	Chr02:1412987-1413797	+	Chr02:1412987-1413797	+	-	-	-	-	-	-	PF02704	PTHR23201 PTHR23201:SF2		AT1G75750	GAST1 protein homolog 1
Potri.009G038800	42.4349	152.362	1.84418	1.05394e-14	4.83383e-13	yes	Chr09:4725937-4726425	-	Chr09:4725937-4726425	-	09150 Organismal Systems|09160 Human Diseases|09180 Brite Hierarchies	09154 Digestive system|09176 Drug resistance: antineoplastic|09183 Protein families: signaling and cellular processes	ko04978 Mineral absorption|ko01524 Platinum drug resistance|ko02000 Transporters	GO:0016021/integral component of membrane	GO:0005375/copper ion transmembrane transporter activity	GO:0035434/copper ion transmembrane transport	PF04145	PTHR12483 PTHR12483:SF45		AT2G26975	Ctr copper transporter family
Potri.014G027800	0	58.3722	6.86721	1.09438e-14	5.01174e-13	yes	Chr14:1742832-1747235	+	Chr14:1742832-1747235	+	-	-	-	-	GO:0004806/triglyceride lipase activity	GO:0006629/lipid metabolic process	PF01764|PF01764	PTHR21493 PTHR21493:SF104|PTHR21493 PTHR21493:SF104	EC:3.1.1.3|EC:3.1.1.3	AT1G56630|AT1G56630	alpha/beta-Hydrolases superfamily protein|alpha/beta-Hydrolases superfamily protein
Potri.002G047100	30.6045	128.625	2.07136	1.23252e-14	5.63586e-13	yes	Chr02:3083610-3087228	+	Chr02:3083610-3087228	+	09100 Metabolism	09108 Metabolism of cofactors and vitamins	ko00130 Ubiquinone and other terpenoid-quinone biosynthesis	-	GO:0008168/methyltransferase activity	GO:0008152/metabolic process	PF08241	PTHR10108 PTHR10108:SF920	EC:2.1.1.295	AT3G63410	S-adenosyl-L-methionine-dependent methyltransferases superfamily protein
Potri.008G121100	16.1303	96.8229	2.58557	1.30061e-14	5.93829e-13	yes	Chr08:7848324-7851505	-	Chr08:7848324-7851505	-	09120 Genetic Information Processing|09180 Brite Hierarchies	09122 Translation|09182 Protein families: genetic information processing	ko03010 Ribosome|ko03011 Ribosome	GO:0015934/large ribosomal subunit	GO:0003735/structural constituent of ribosome	GO:0006412/translation	PF00828	PTHR12934 PTHR12934:SF11		AT3G25920	ribosomal protein L15
Potri.002G081000	69.6512	201.078	1.52953	1.32837e-14	6.05594e-13	yes	Chr02:5723766-5725777	+	Chr02:5723766-5725777	+	-	-	-	-	GO:0003677/DNA binding	GO:0006355/regulation of transcription, DNA-templated	PF02365	PTHR31719 PTHR31719:SF3		AT1G01720	NAC (No Apical Meristem) domain transcriptional regulator superfamily protein
Potri.015G086500	22.0583	110.265	2.32159	1.36702e-14	6.22279e-13	yes	Chr15:11066351-11069294	+	Chr15:11066351-11069294	+	09160 Human Diseases|09180 Brite Hierarchies	09171 Infectious disease: bacterial|09182 Protein families: genetic information processing	ko05130 Pathogenic Escherichia coli infection|ko03009 Ribosome biogenesis|ko03036 Chromosome and associated proteins	-	GO:0003676/nucleic acid binding	-	PF00076	PTHR24012		AT4G24770	31-kDa RNA binding protein
Potri.016G125400	182.95	69.8046	-1.39006	1.47902e-14	6.72256e-13	yes	Chr16:12901134-12902236	+	Chr16:12901134-12902236	+	09130 Environmental Information Processing	09132 Signal transduction	ko04016 MAPK signaling pathway - plant|ko04075 Plant hormone signal transduction	-	-	GO:0009607/response to biotic stimulus|GO:0006952/defense response	PF10604	PTHR31213 PTHR31213:SF3		AT2G38310	PYR1-like 4
Potri.008G131200	131.385	38.3838	-1.77523	1.51109e-14	6.85807e-13	yes	Chr08:8629396-8630590	-	Chr08:8629396-8630590	-	-	-	-	-	-	GO:0009607/response to biotic stimulus|GO:0006952/defense response	PF00407	PTHR31338 PTHR31338:SF15		AT1G30990	Polyketide cyclase/dehydrase and lipid transport superfamily protein
Potri.008G132600	97.7975	20.4222	-2.25966	1.52673e-14	6.91873e-13	yes	Chr08:8769221-8770298	-	Chr08:8769221-8770298	-	-	-	-	-	GO:0004857/enzyme inhibitor activity|GO:0030599/pectinesterase activity	-	PF04043	PTHR31080 PTHR31080:SF10	EC:3.1.1.11	AT2G01610	Plant invertase/pectin methylesterase inhibitor superfamily protein
Potri.009G058500	146.571	47.3317	-1.63073	1.61496e-14	7.3077e-13	yes	Chr09:6118372-6118955	+	Chr09:6118372-6118955	+	-	-	-	-	-	-		PTHR33983
Potri.002G092500	70.2028	8.0267	-3.12865	1.63285e-14	7.37765e-13	yes	Chr02:6705274-6711989	+	Chr02:6705274-6711989	+	09180 Brite Hierarchies	09183 Protein families: signaling and cellular processes	ko02000 Transporters	GO:0016021/integral component of membrane	GO:0005215/transporter activity	GO:0055085/transmembrane transport	PF00916 PF01740|PF00916 PF01740|PF00916 PF01740|PF00916 PF01740	PTHR11814 PTHR11814:SF65|PTHR11814 PTHR11814:SF65|PTHR11814 PTHR11814:SF65|PTHR11814 PTHR11814:SF65		AT1G22150|AT1G22150|AT1G22150|AT1G22150	sulfate transporter 1;3|sulfate transporter 1;3|sulfate transporter 1;3|sulfate transporter 1;3
Potri.010G193300	10.1082	81.3675	3.00893	1.64426e-14	7.4182e-13	yes	Chr10:18836192-18839971	-	Chr10:18836192-18839971	-	09100 Metabolism	09102 Energy metabolism	ko00710 Carbon fixation in photosynthetic organisms	-	GO:0042578/phosphoric ester hydrolase activity	GO:0005975/carbohydrate metabolic process	PF00316	PTHR11556 PTHR11556:SF2	EC:3.1.3.37	AT3G55800	sedoheptulose-bisphosphatase
Potri.018G051300	0	59.2993	7.34631	1.65723e-14	7.46566e-13	yes	Chr18:4978715-4981379	-	Chr18:4978715-4981379	-	-	-	-	-	GO:0020037/heme binding|GO:0009055/electron transfer activity|GO:0016705/oxidoreductase activity, acting on paired donors, with incorporation or reduction of molecular oxygen	GO:0055114/oxidation-reduction process	PF00067	PTHR24298 PTHR24298:SF67	EC:1.14.13.21
Potri.014G033400	56.6321	2.9191	-4.27803	1.71813e-14	7.72855e-13	yes	Chr14:2049571-2052013	+	Chr14:2049571-2052013	+	-	-	-	-	-	GO:0006629/lipid metabolic process	PF01734	PTHR32176		AT2G26560	phospholipase A 2A
Potri.006G239700	170.744	62.2873	-1.45482	1.74848e-14	7.85343e-13	yes	Chr06:24168780-24170657	-	Chr06:24168780-24170657	-	09180 Brite Hierarchies	09183 Protein families: signaling and cellular processes	ko02000 Transporters	GO:0016020/membrane	GO:0005215/transporter activity	GO:0006810/transport	PF00230	PTHR19139 PTHR19139:SF52		AT2G25810	tonoplast intrinsic protein 4;1
Potri.011G099800	86.2803	15.0339	-2.52081	1.75403e-14	7.86673e-13	yes	Chr11:12837556-12853245	+	Chr11:12837556-12853245	+	-	-	-	-	GO:0020037/heme binding|GO:0009055/electron transfer activity|GO:0016705/oxidoreductase activity, acting on paired donors, with incorporation or reduction of molecular oxygen	GO:0055114/oxidation-reduction process	PF00067	PTHR24282 PTHR24282:SF53	EC:1.14.13.173	AT3G14630	cytochrome P450, family 72, subfamily A, polypeptide 9
Potri.018G053600	0	55.8962	6.01496	1.80128e-14	8.06677e-13	yes	Chr18:5263950-5265689	+	Chr18:5263950-5265689	+	-	-	-	-	GO:0043565/sequence-specific DNA binding|GO:0008270/zinc ion binding|GO:0003700/DNA binding transcription factor activity	GO:0006355/regulation of transcription, DNA-templated	PF00320	PTHR10071 PTHR10071:SF191		AT4G26150	cytokinin-responsive gata factor 1
Potri.017G111100	16.4192	96.8056	2.55971	1.86469e-14	8.33847e-13	yes	Chr17:11878786-11879564	+	Chr17:11878786-11879564	+	-	-	-	-	-	-		PTHR34023 PTHR34023:SF1
Potri.001G384600	17.3384	98.91	2.51215	1.91123e-14	8.53401e-13	yes	Chr01:40377218-40381674	+	Chr01:40377218-40381674	+	09120 Genetic Information Processing|09180 Brite Hierarchies	09122 Translation|09182 Protein families: genetic information processing	ko03010 Ribosome|ko03011 Ribosome	GO:0005840/ribosome	GO:0003735/structural constituent of ribosome	GO:0006412/translation	PF00572	PTHR11545 PTHR11545:SF7		AT1G78630	Ribosomal protein L13 family protein
Potri.018G088600	0	57.1959	6.83784	1.92937e-14	8.60237e-13	yes	Chr18:10757162-10759004	-	Chr18:10757162-10759004	-	-	-	-	-	GO:0016788/hydrolase activity, acting on ester bonds	GO:0006629/lipid metabolic process	PF00657	PTHR22835 PTHR22835:SF157	EC:3.1.1.3
Potri.012G105700	52.9044	1.42965	-5.20965	1.93212e-14	8.60205e-13	yes	Chr12:12751924-12752721	-	Chr12:12751924-12752721	-	-	-	-	-	GO:0003854/3-beta-hydroxy-delta5-steroid dehydrogenase activity|GO:0016616/oxidoreductase activity, acting on the CH-OH group of donors, NAD or NADP as acceptor|GO:0016491/oxidoreductase activity	GO:0055114/oxidation-reduction process|GO:0006694/steroid biosynthetic process	PF08659	PTHR24322 PTHR24322:SF498	EC:1.1.1.223 EC:1.1.1.243
Potri.007G093700	10.7734	82.6126	2.93889	2.15244e-14	9.5689e-13	yes	Chr07:11916863-11920512	+	Chr07:11916863-11920512	+	09120 Genetic Information Processing|09180 Brite Hierarchies	09122 Translation|09182 Protein families: genetic information processing	ko03010 Ribosome|ko03011 Ribosome	GO:0005840/ribosome|GO:0005622/intracellular	GO:0003735/structural constituent of ribosome	GO:0006412/translation	PF00831	PTHR10916 PTHR10916:SF0		AT5G65220	Ribosomal L29 family protein
Potri.016G121650	2.2416	58.1171	4.69636	2.22193e-14	9.86341e-13	yes	Chr16:12625889-12626727	+	Chr16:12625889-12626727	+	-	-	-	-	-	-
Potri.014G106600	65.0236	6.28155	-3.37177	2.55502e-14	1.13255e-12	yes	Chr14:7161909-7163995	+	Chr14:7161909-7163995	+	09100 Metabolism	09110 Biosynthesis of other secondary metabolites	ko00940 Phenylpropanoid biosynthesis	-	GO:0046983/protein dimerization activity|GO:0008171/O-methyltransferase activity	-	PF00891 PF08100	PTHR11746 PTHR11746:SF103
Potri.003G103700	47.2304	159.232	1.75334	2.62199e-14	1.16054e-12	yes	Chr03:12760288-12762045	+	Chr03:12760288-12762045	+	09150 Organismal Systems	09152 Endocrine system	ko03320 PPAR signaling pathway	-	GO:0000062/fatty-acyl-CoA binding	-	PF00887	PTHR23310 PTHR23310:SF67		AT1G31812	acyl-CoA-binding protein 6
Potri.007G024400	52.9871	0	-6.5384	2.6883e-14	1.18817e-12	yes	Chr07:1874059-1875926	-	Chr07:1874059-1875926	-	-	-	-	-	-	-	PF12695|PF00561	PTHR10992 PTHR10992:SF838|PTHR10992 PTHR10992:SF838	EC:3.1.1.23|EC:3.1.3.76 EC:3.3.2.10	AT4G36610|AT4G36610	alpha/beta-Hydrolases superfamily protein|alpha/beta-Hydrolases superfamily protein
Potri.015G020000	52.0694	0	-6.15259	3.00463e-14	1.32605e-12	yes	Chr15:1388977-1390911	+	Chr15:1388977-1390911	+	-	-	-	-	GO:0003677/DNA binding	GO:0006355/regulation of transcription, DNA-templated	PF02365	PTHR31744 PTHR31744:SF7		AT5G07680	NAC domain containing protein 80
Potri.009G104400	22.6137	109.695	2.27823	3.26406e-14	1.43638e-12	yes	Chr09:9162043-9163214	-	Chr09:9162043-9163214	-	-	-	-	-	GO:0016787/hydrolase activity	GO:0008152/metabolic process	PF00135	PTHR23024 PTHR23024:SF196	EC:3.1.1.1	AT1G49650	alpha/beta-Hydrolases superfamily protein
Potri.015G041300	6.10177	69.0784	3.50094	3.26687e-14	1.43553e-12	yes	Chr15:3805279-3808975	+	Chr15:3805279-3808975	+	09100 Metabolism	09101 Carbohydrate metabolism|09106 Metabolism of other amino acids|09110 Biosynthesis of other secondary metabolites	ko00500 Starch and sucrose metabolism|ko00460 Cyanoamino acid metabolism|ko00940 Phenylpropanoid biosynthesis	-	GO:0004553/hydrolase activity, hydrolyzing O-glycosyl compounds	GO:0005975/carbohydrate metabolic process	PF00232	PTHR10353 PTHR10353:SF28	EC:3.2.1.21	AT3G18070	beta glucosidase 43
Potri.004G167700	191.499	76.6951	-1.32013	3.31284e-14	1.45363e-12	yes	Chr04:18590955-18591560	+	Chr04:18590955-18591560	+	-	-	-	-	-	-		PTHR33306 PTHR33306:SF7		AT2G21180
Potri.017G131800	23.9273	112.29	2.2305	3.67817e-14	1.61161e-12	yes	Chr17:13440559-13442526	-	Chr17:13440559-13442526	-	-	-	-	-	GO:0004190/aspartic-type endopeptidase activity	GO:0006508/proteolysis	PF00026	PTHR13683 PTHR13683:SF327	EC:3.4.23.12	AT1G66180	Eukaryotic aspartyl protease family protein
Potri.008G101100	10.9135	81.8241	2.90642	4.0148e-14	1.75657e-12	yes	Chr08:6347364-6350753	+	Chr08:6347364-6350753	+	09120 Genetic Information Processing|09180 Brite Hierarchies	09122 Translation|09182 Protein families: genetic information processing	ko03010 Ribosome|ko03011 Ribosome	-	GO:0003723/RNA binding	-	PF00575	PTHR10724 PTHR10724:SF7		AT5G30510	ribosomal protein S1
Potri.010G210000	5.89428	68.1027	3.53033	4.03901e-14	1.76463e-12	yes	Chr10:19919569-19921681	+	Chr10:19919569-19921681	+	09100 Metabolism|09180 Brite Hierarchies	09102 Energy metabolism|09181 Protein families: metabolism	ko00195 Photosynthesis|ko00194 Photosynthesis proteins	GO:0019898/extrinsic component of membrane|GO:0009654/photosystem II oxygen evolving complex	GO:0005509/calcium ion binding	GO:0015979/photosynthesis	PF01789	PTHR31407 PTHR31407:SF10		AT2G39470	PsbP-like protein 2
Potri.016G134600	77.0791	11.6643	-2.72424	4.62208e-14	2.01647e-12	yes	Chr16:13875640-13880779	-	Chr16:13875640-13880779	-	09180 Brite Hierarchies	09181 Protein families: metabolism	ko01001 Protein kinases|ko01009 Protein phosphatases and associated proteins	-	GO:0005524/ATP binding|GO:0004672/protein kinase activity	GO:0006468/protein phosphorylation	PF00069	PTHR13902 PTHR13902:SF68	EC:2.7.11.1	AT3G51630	with no lysine (K) kinase 5
Potri.001G263900	4.43144	63.455	3.83989	4.78999e-14	2.08673e-12	yes	Chr01:27946040-27948905	-	Chr01:27946040-27948905	-	-	-	-	-	-	-	PF04862|PF04862	PTHR31265 PTHR31265:SF2|PTHR31265 PTHR31265:SF2		AT3G08030|AT3G08030	Protein of unknown function, DUF642|Protein of unknown function, DUF642
Potri.006G090033	88.1052	16.7544	-2.39468	4.8426e-14	2.10664e-12	yes	Chr06:6862116-6862223	-	Chr06:6862116-6862223	-	-	-	-	-	-	-
Potri.019G073700	0	57.1991	7.35785	4.90104e-14	2.12901e-12	yes	Chr19:11517216-11518399	-	Chr19:11517216-11518399	-	-	-	-	GO:0031012/extracellular matrix	GO:0008270/zinc ion binding|GO:0004222/metalloendopeptidase activity	GO:0008152/metabolic process|GO:0006508/proteolysis	PF00413 PF01471|PF00413 PF01471	PTHR10201 PTHR10201:SF152|PTHR10201 PTHR10201:SF152	EC:3.4.24.23|EC:3.4.24.23
Potri.010G164900	52.3218	1.92494	-4.76453	4.99846e-14	2.16823e-12	yes	Chr10:16896147-16900175	+	Chr10:16896147-16900175	+	-	-	-	GO:0016021/integral component of membrane	-	-	PF03105 PF03124	PTHR10783 PTHR10783:SF43		AT2G03260	EXS (ERD1/XPR1/SYG1) family protein
Potri.002G065300	229.607	103.315	-1.15212	5.1017e-14	2.20986e-12	yes	Chr02:4477176-4479580	-	Chr02:4477176-4479580	-	09100 Metabolism	09110 Biosynthesis of other secondary metabolites	ko00940 Phenylpropanoid biosynthesis	-	GO:0020037/heme binding|GO:0004601/peroxidase activity	GO:0055114/oxidation-reduction process|GO:0006979/response to oxidative stress	PF00141	PTHR31235 PTHR31235:SF77	EC:1.11.1.7	AT1G71695	Peroxidase superfamily protein
Potri.009G108900	75.1584	10.9207	-2.78287	5.2251e-14	2.2601e-12	yes	Chr09:9404132-9405623	-	Chr09:9404132-9405623	-	-	-	-	-	-	-	PF04819	PTHR16007 PTHR16007:SF14		AT1G49470	Family of unknown function (DUF716)
Potri.006G086100	5.43336	66.2825	3.60871	5.28015e-14	2.28066e-12	yes	Chr06:6441048-6442448	-	Chr06:6441048-6442448	-	-	-	-	-	-	-	PF01357 PF03330	PTHR31867 PTHR31867:SF9		AT2G37640	Barwin-like endoglucanases superfamily protein
Potri.015G076000	51.6929	0	-6.5556	5.64549e-14	2.43501e-12	yes	Chr15:10209709-10211871	-	Chr15:10209709-10211871	-	09100 Metabolism	09102 Energy metabolism	ko00910 Nitrogen metabolism	-	GO:0004089/carbonate dehydratase activity|GO:0008270/zinc ion binding	GO:0015976/carbon utilization	PF00484	PTHR11002 PTHR11002:SF18	EC:4.2.1.1
Potri.011G026032	124.188	35.9222	-1.78958	5.82184e-14	2.50751e-12	yes	Chr11:1923407-1924373	+	Chr11:1923407-1924373	+	-	-	-	-	-	-	PF00407	PTHR31213 PTHR31213:SF11
Potri.014G146100	20.9887	104.932	2.32177	5.85719e-14	2.51917e-12	yes	Chr14:9988151-9989913	-	Chr14:9988151-9989913	-	09190 Not Included in Pathway or Brite	09191 Unclassified: metabolism	ko99980 Enzymes with EC numbers	GO:0048046/apoplast|GO:0005618/cell wall	GO:0016762/xyloglucan:xyloglucosyl transferase activity|GO:0004553/hydrolase activity, hydrolyzing O-glycosyl compounds	GO:0006073/cellular glucan metabolic process|GO:0005975/carbohydrate metabolic process	PF00722 PF06955	PTHR31062 PTHR31062:SF34	EC:2.4.1.207 EC:3.2.1.151	AT4G14130	xyloglucan endotransglucosylase/hydrolase 15
Potri.002G065000	11.9595	83.746	2.80786	5.96999e-14	2.56406e-12	yes	Chr02:4451688-4453904	+	Chr02:4451688-4453904	+	-	-	-	-	-	-		PTHR14154 PTHR14154:SF12		AT1G34000	one-helix protein 2
Potri.011G047300	117.385	32.1435	-1.86865	6.01425e-14	2.57943e-12	yes	Chr11:3747276-3749628	-	Chr11:3747276-3749628	-	09100 Metabolism	09105 Amino acid metabolism|09110 Biosynthesis of other secondary metabolites	ko00350 Tyrosine metabolism|ko00950 Isoquinoline alkaloid biosynthesis	-	GO:0016491/oxidoreductase activity|GO:0004097/catechol oxidase activity	GO:0055114/oxidation-reduction process	PF00264 PF12142 PF12143	PTHR11474 PTHR11474:SF33	EC:1.10.3.1
Potri.005G143900	86.8009	16.4323	-2.40118	6.82221e-14	2.92183e-12	yes	Chr05:11584153-11586086	+	Chr05:11584153-11586086	+	-	-	-	-	GO:0020037/heme binding|GO:0009055/electron transfer activity|GO:0016705/oxidoreductase activity, acting on paired donors, with incorporation or reduction of molecular oxygen	GO:0055114/oxidation-reduction process	PF00067	PTHR24298 PTHR24298:SF116	EC:1.14.13.89	AT1G66540	Cytochrome P450 superfamily protein
Potri.008G118700	29.98	123.565	2.04319	6.96002e-14	2.97666e-12	yes	Chr08:7626089-7627390	+	Chr08:7626089-7627390	+	09180 Brite Hierarchies	09182 Protein families: genetic information processing	ko03011 Ribosome	GO:0005840/ribosome|GO:0005622/intracellular|GO:0009536/plastid	GO:0003735/structural constituent of ribosome	GO:0006412/translation	PF04839	PTHR35108 PTHR35108:SF1		AT1G68590	Ribosomal protein PSRP-3/Ycf65
Potri.002G156300	55.2943	3.26825	-4.08054	6.99916e-14	2.98919e-12	yes	Chr02:11921905-11924434	+	Chr02:11921905-11924434	+	09100 Metabolism	09109 Metabolism of terpenoids and polyketides	ko00902 Monoterpenoid biosynthesis	-	GO:0016491/oxidoreductase activity	GO:0008152/metabolic process	PF00106	PTHR24322 PTHR24322:SF442
Potri.010G061700	52.0361	2.06202	-4.65739	7.26014e-14	3.0963e-12	yes	Chr10:9123860-9124928	+	Chr10:9123860-9124928	+	09100 Metabolism|09150 Organismal Systems|09160 Human Diseases|09180 Brite Hierarchies	09106 Metabolism of other amino acids|09111 Xenobiotics biodegradation and metabolism|09149 Aging|09161 Cancer: overview|09162 Cancer: specific types|09166 Cardiovascular disease|09176 Drug resistance: antineoplastic|09183 Protein families: signaling and cellular processes	ko00480 Glutathione metabolism|ko00980 Metabolism of xenobiotics by cytochrome P450|ko00982 Drug metabolism - cytochrome P450|ko00983 Drug metabolism - other enzymes|ko04212 Longevity regulating pathway - worm|ko05200 Pathways in cancer|ko05204 Chemical carcinogenesis|ko05225 Hepatocellular carcinoma|ko05418 Fluid shear stress and atherosclerosis|ko01524 Platinum drug resistance|ko02000 Transport…	-	GO:0005515/protein binding	-	PF00043 PF02798	PTHR11260 PTHR11260:SF227	EC:2.5.1.18
Potri.002G126900	8.03115	73.0769	3.18574	7.35701e-14	3.13322e-12	yes	Chr02:9625424-9625994	+	Chr02:9625424-9625994	+	-	-	-	-	-	-	PF13202 PF13405	PTHR10891 PTHR10891:SF592
Potri.005G032400	66.4945	7.56055	-3.13667	7.46663e-14	3.17546e-12	yes	Chr05:2138858-2144230	+	Chr05:2138858-2144230	+	09100 Metabolism	09103 Lipid metabolism	ko00591 Linoleic acid metabolism	-	GO:0046872/metal ion binding|GO:0005515/protein binding|GO:0016702/oxidoreductase activity, acting on single donors with incorporation of molecular oxygen, incorporation of two atoms of oxygen	GO:0055114/oxidation-reduction process	PF00305 PF01477|PF00305	PTHR11771 PTHR11771:SF48|PTHR11771 PTHR11771:SF48	EC:1.13.11.58|EC:1.13.11.58	AT1G55020|AT1G55020	lipoxygenase 1|lipoxygenase 1
Potri.003G165600	72.724	10.2456	-2.82743	8.62286e-14	3.66206e-12	yes	Chr03:17474759-17476530	+	Chr03:17474759-17476530	+	-	-	-	-	-	-	PF02893	PTHR31969 PTHR31969:SF3		AT5G13200	GRAM domain family protein
Potri.001G415400	24.8729	112.452	2.17667	8.88786e-14	3.76935e-12	yes	Chr01:44385684-44389014	+	Chr01:44385684-44389014	+	09120 Genetic Information Processing|09180 Brite Hierarchies	09122 Translation|09182 Protein families: genetic information processing	ko03010 Ribosome|ko03011 Ribosome	GO:0005840/ribosome|GO:0005622/intracellular	GO:0003735/structural constituent of ribosome	GO:0006412/translation	PF00467	PTHR12903 PTHR12903:SF1		AT5G54600	Translation protein SH3-like family protein
Potri.009G134100	96.3987	240.208	1.3172	9.2752e-14	3.92267e-12	yes	Chr09:10858852-10863282	-	Chr09:10858852-10863282	-	09100 Metabolism	09101 Carbohydrate metabolism|09106 Metabolism of other amino acids	ko00053 Ascorbate and aldarate metabolism|ko00480 Glutathione metabolism	-	GO:0020037/heme binding|GO:0004601/peroxidase activity	GO:0055114/oxidation-reduction process|GO:0006979/response to oxidative stress	PF00141	PTHR31356 PTHR31356:SF9	EC:1.11.1.11	AT4G35000	ascorbate peroxidase 3
Potri.001G312600	74.2488	0	-10.152	9.6239e-14	4.06449e-12	yes	Chr01:32317781-32319763	+	Chr01:32317781-32319763	+	-	-	-	-	GO:0016758/transferase activity, transferring hexosyl groups	GO:0008152/metabolic process	PF00201	PTHR11926 PTHR11926:SF286	EC:2.4.1.324
Potri.007G143800	0	53.0717	6.37132	9.87002e-14	4.16266e-12	yes	Chr07:15303597-15306523	-	Chr07:15303597-15306523	-	-	-	-	-	GO:0008270/zinc ion binding|GO:0016491/oxidoreductase activity	GO:0055114/oxidation-reduction process	PF00107 PF16884	PTHR11695 PTHR11695:SF564	EC:1.1.1.54 EC:1.3.1.102 EC:1.3.1.74	AT5G16960	Zinc-binding dehydrogenase family protein
Potri.015G077600	84.3417	15.6161	-2.43321	1.02144e-13	4.30192e-12	yes	Chr15:10407945-10416513	+	Chr15:10407945-10416513	+	-	-	-	GO:0016021/integral component of membrane|GO:0016020/membrane	GO:0005452/inorganic anion exchanger activity	GO:0006820/anion transport	PF00955|PF00955|PF00955|PF00955|PF00955|PF00955|PF00955	PTHR11453 PTHR11453:SF51|PTHR11453 PTHR11453:SF51|PTHR11453 PTHR11453:SF51|PTHR11453 PTHR11453:SF51|PTHR11453 PTHR11453:SF51|PTHR11453 PTHR11453:SF51|PTHR11453 PTHR11453:SF51
Potri.007G097100	159.037	57.6137	-1.46488	1.04039e-13	4.3757e-12	yes	Chr07:12208798-12212178	-	Chr07:12208798-12212178	-	09180 Brite Hierarchies	09182 Protein families: genetic information processing	ko03000 Transcription factors	GO:0005634/nucleus	GO:0043565/sequence-specific DNA binding|GO:0003700/DNA binding transcription factor activity	GO:0006355/regulation of transcription, DNA-templated	PF00046 PF02183|PF00046 PF02183	PTHR24326 PTHR24326:SF196|PTHR24326 PTHR24326:SF196		AT4G40060|AT4G40060	homeobox protein 16|homeobox protein 16
Potri.004G179514	61.66	5.89688	-3.38631	1.07091e-13	4.49783e-12	yes	Chr04:19364042-19375940	-	Chr04:19364042-19375940	-	-	-	-	-	-	-	PF07714|PF07714|PF07714	PTHR23257 PTHR23257:SF347|PTHR23257 PTHR23257:SF347|PTHR23257 PTHR23257:SF347	EC:2.7.12.1|EC:2.7.12.1|EC:2.7.12.1	AT4G38470|AT4G38470|AT4G38470	ACT-like protein tyrosine kinase family protein|ACT-like protein tyrosine kinase family protein|ACT-like protein tyrosine kinase family protein
Potri.007G128200	16.4222	93.2962	2.50617	1.1246e-13	4.7168e-12	yes	Chr07:14326935-14328261	-	Chr07:14326935-14328261	-	-	-	-	-	-	-	PF05419	PTHR34800 PTHR34800:SF1		AT3G59400	enzyme binding;tetrapyrrole binding
Potri.006G224500	214.027	94.1933	-1.18409	1.20778e-13	5.05872e-12	yes	Chr06:22923079-22929088	+	Chr06:22923079-22929088	+	09180 Brite Hierarchies	09181 Protein families: metabolism	ko01002 Peptidases and inhibitors	-	GO:0008270/zinc ion binding|GO:0008237/metallopeptidase activity	GO:0006508/proteolysis	PF01433 PF11838|PF01433 PF11838	PTHR11533 PTHR11533:SF189|PTHR11533 PTHR11533:SF189	EC:3.4.11.2|EC:3.4.11.2	AT4G33090|AT4G33090	aminopeptidase M1|aminopeptidase M1
Potri.006G156038	6.15113	66.8337	3.44165	1.27075e-13	5.31512e-12	yes	Chr06:14841145-14846512	+	Chr06:14841145-14846512	+	09180 Brite Hierarchies	09183 Protein families: signaling and cellular processes	ko02000 Transporters	-	-	-	PF00916 PF01740|PF00916 PF01740	PTHR11814 PTHR11814:SF54|PTHR11814 PTHR11814:SF54		AT5G19600|AT5G19600	sulfate transporter 3;5|sulfate transporter 3;5
Potri.014G070800	51.5433	2.25167	-4.51672	1.31162e-13	5.47852e-12	yes	Chr14:4509286-4510188	+	Chr14:4509286-4510188	+	-	-	-	-	-	-	PF03479	PTHR31100 PTHR31100:SF2		AT2G45430	AT-hook motif nuclear-localized protein 22
Potri.002G248500	50.8177	1.98045	-4.68143	1.34611e-13	5.6149e-12	yes	Chr02:23872526-23875634	-	Chr02:23872526-23875634	-	-	-	-	-	GO:0030528/obsolete transcription regulator activity	GO:0006355/regulation of transcription, DNA-templated	PF00010	PTHR12565 PTHR12565:SF99		AT3G07340	basic helix-loop-helix (bHLH) DNA-binding superfamily protein
Potri.007G105700	31.1373	124.343	1.99761	1.4089e-13	5.86876e-12	yes	Chr07:12880038-12881232	-	Chr07:12880038-12881232	-	-	-	-	-	-	-		PTHR33133 PTHR33133:SF8|PTHR33133 PTHR33133:SF8
Potri.006G210600	171.71	66.1906	-1.37528	1.42855e-13	5.94247e-12	yes	Chr06:21776024-21781008	-	Chr06:21776024-21781008	-	09100 Metabolism	09101 Carbohydrate metabolism	ko00052 Galactose metabolism|ko00500 Starch and sucrose metabolism	-	-	-	PF00251 PF08244	PTHR31953 PTHR31953:SF1	EC:3.2.1.26	AT2G36190	cell wall invertase 4
Potri.016G135500	6.19206	66.7028	3.42926	1.46335e-13	6.07889e-12	yes	Chr16:13977304-13978361	+	Chr16:13977304-13978361	+	-	-	-	-	-	-	PF00234	PTHR33076 PTHR33076:SF20		AT2G15050	lipid transfer protein
Potri.011G031300	21.8417	104.89	2.26372	1.48163e-13	6.14643e-12	yes	Chr11:2545793-2549002	+	Chr11:2545793-2549002	+	09100 Metabolism|09180 Brite Hierarchies	09102 Energy metabolism|09181 Protein families: metabolism	ko00195 Photosynthesis|ko00194 Photosynthesis proteins	GO:0019898/extrinsic component of membrane|GO:0009654/photosystem II oxygen evolving complex	GO:0005509/calcium ion binding	GO:0015979/photosynthesis	PF05757	PTHR33399 PTHR33399:SF3		AT4G21280	photosystem II subunit QA
Potri.001G270500	68.6119	8.90283	-2.94612	1.48826e-13	6.16554e-12	yes	Chr01:28493444-28496144	-	Chr01:28493444-28496144	-	-	-	-	-	GO:0020037/heme binding|GO:0009055/electron transfer activity|GO:0016705/oxidoreductase activity, acting on paired donors, with incorporation or reduction of molecular oxygen	GO:0055114/oxidation-reduction process	PF00067	PTHR24286 PTHR24286:SF74
Potri.003G119100	71.2934	10.048	-2.82686	1.51321e-13	6.26039e-12	yes	Chr03:14060958-14062664	-	Chr03:14060958-14062664	-	09100 Metabolism	09110 Biosynthesis of other secondary metabolites	ko00941 Flavonoid biosynthesis	-	GO:0016706/oxidoreductase activity, acting on paired donors, with incorporation or reduction of molecular oxygen, 2-oxoglutarate as one donor, and incorporation of one atom each of oxygen into both donors|GO:0016491/oxidoreductase activity	GO:0055114/oxidation-reduction process	PF03171 PF14226	PTHR10209 PTHR10209:SF190	EC:1.14.11.19	AT4G22880	leucoanthocyanidin dioxygenase
Potri.010G059401	104.289	26.1714	-1.99453	1.70741e-13	7.04464e-12	yes	Chr10:8948338-8951249	-	Chr10:8948338-8951249	-	09180 Brite Hierarchies	09181 Protein families: metabolism	ko01009 Protein phosphatases and associated proteins	-	-	-	PF07649 PF13905|PF07649 PF13905	PTHR13871 PTHR13871:SF7|PTHR13871 PTHR13871:SF7	EC:1.8.1.8|EC:1.8.1.8	AT1G60420|AT1G60420	DC1 domain-containing protein|DC1 domain-containing protein
Potri.007G080800	17.303	94.4897	2.44914	1.71718e-13	7.07535e-12	yes	Chr07:10505883-10507920	+	Chr07:10505883-10507920	+	-	-	-	-	-	-		PTHR33882		AT5G09960	(1 of 11) PF05627 - Cleavage site for pathogenic type III effector avirulence factor Avr (AvrRpt-cleavage)
Potri.012G097400	104.867	26.516	-1.98363	1.76519e-13	7.26331e-12	yes	Chr12:12123817-12128741	-	Chr12:12123817-12128741	-	-	-	-	-	GO:0016787/hydrolase activity	-	PF00149 PF14008 PF16656	PTHR22953 PTHR22953:SF33	EC:3.1.4.1	AT4G24890	purple acid phosphatase 24
Potri.004G020500	1.80143	53.08	4.88095	1.95506e-13	8.03372e-12	yes	Chr04:1491008-1493835	-	Chr04:1491008-1493835	-	09100 Metabolism	09108 Metabolism of cofactors and vitamins	ko00730 Thiamine metabolism	-	GO:0009055/electron transfer activity|GO:0016705/oxidoreductase activity, acting on paired donors, with incorporation or reduction of molecular oxygen	GO:0055114/oxidation-reduction process|GO:0016117/carotenoid biosynthetic process	PF01946	PTHR10617 PTHR10617:SF115		AT5G54770	thiazole biosynthetic enzyme, chloroplast (ARA6) (THI1) (THI4)
Potri.006G061400	2.11786	53.9445	4.6708	1.98924e-13	8.16313e-12	yes	Chr06:4373867-4374826	-	Chr06:4373867-4374826	-	-	-	-	-	-	-	PF07647	PTHR33915 PTHR33915:SF3|PTHR33915 PTHR33915:SF3		AT2G12462|AT2G12462
Potri.003G149700	59.9365	5.64319	-3.40885	2.04131e-13	8.36552e-12	yes	Chr03:16302806-16304613	-	Chr03:16302806-16304613	-	-	-	-	-	GO:0003677/DNA binding	GO:0006355/regulation of transcription, DNA-templated	PF02365	PTHR31719 PTHR31719:SF5
Potri.017G138800	15.4209	89.7618	2.54121	2.0722e-13	8.48066e-12	yes	Chr17:14005168-14006771	-	Chr17:14005168-14006771	-	09100 Metabolism|09150 Organismal Systems|09160 Human Diseases|09180 Brite Hierarchies	09106 Metabolism of other amino acids|09111 Xenobiotics biodegradation and metabolism|09149 Aging|09161 Cancer: overview|09162 Cancer: specific types|09166 Cardiovascular disease|09176 Drug resistance: antineoplastic|09183 Protein families: signaling and cellular processes	ko00480 Glutathione metabolism|ko00980 Metabolism of xenobiotics by cytochrome P450|ko00982 Drug metabolism - cytochrome P450|ko00983 Drug metabolism - other enzymes|ko04212 Longevity regulating pathway - worm|ko05200 Pathways in cancer|ko05204 Chemical carcinogenesis|ko05225 Hepatocellular carcinoma|ko05418 Fluid shear stress and atherosclerosis|ko01524 Platinum drug resistance|ko02000 Transport…	-	GO:0005515/protein binding	-	PF00043 PF02798	PTHR11260 PTHR11260:SF186	EC:2.5.1.18	AT3G03190	glutathione S-transferase F11
Potri.001G158400	48.6789	1.33822	-5.18491	2.13457e-13	8.72419e-12	yes	Chr01:13381758-13382606	-	Chr01:13381758-13382606	-	-	-	-	-	-	-	PF14547	PTHR31731 PTHR31731:SF26		AT1G62510	Bifunctional inhibitor/lipid-transfer protein/seed storage 2S albumin superfamily protein
Potri.001G294800	107.817	28.3518	-1.92707	2.20515e-13	9.00058e-12	yes	Chr01:30614804-30615398	+	Chr01:30614804-30615398	+	-	-	-	-	-	-		PTHR38370		AT3G19615
Potri.006G258900	49.1827	1.73224	-4.82744	2.53498e-13	1.03191e-11	yes	Chr06:25539257-25541212	-	Chr06:25539257-25541212	-	09150 Organismal Systems|09180 Brite Hierarchies	09152 Endocrine system|09182 Protein families: genetic information processing|09183 Protein families: signaling and cellular processes	ko04910 Insulin signaling pathway|ko04131 Membrane trafficking|ko03036 Chromosome and associated proteins|ko04147 Exosome	-	-	-	PF01145	PTHR13806 PTHR13806:SF23		AT5G64870	SPFH/Band 7/PHB domain-containing membrane-associated protein family
Potri.001G083300	1.92568	52.9067	4.78001	2.6296e-13	1.069e-11	yes	Chr01:6587798-6589969	-	Chr01:6587798-6589969	-	-	-	-	-	-	-	PF13225	PTHR33591 PTHR33591:SF1	EC:5.2.1.14	AT1G64680	(1 of 3) PF13225 - Domain of unknown function (DUF4033) (DUF4033)
Potri.013G070100	48.9376	156.591	1.67799	2.7536e-13	1.11791e-11	yes	Chr13:5703198-5706521	+	Chr13:5703198-5706521	+	09120 Genetic Information Processing|09180 Brite Hierarchies	09122 Translation|09182 Protein families: genetic information processing	ko03010 Ribosome|ko03011 Ribosome	GO:0005840/ribosome|GO:0005622/intracellular	GO:0003735/structural constituent of ribosome	GO:0006412/translation	PF00297	PTHR11229 PTHR11229:SF5		AT2G43030	Ribosomal protein L3 family protein
Potri.002G107700	242.027	115.557	-1.06656	2.80735e-13	1.13821e-11	yes	Chr02:7998800-8005939	-	Chr02:7998800-8005939	-	09100 Metabolism	09101 Carbohydrate metabolism|09102 Energy metabolism	ko00010 Glycolysis / Gluconeogenesis|ko00020 Citrate cycle (TCA cycle)|ko00620 Pyruvate metabolism|ko00710 Carbon fixation in photosynthetic organisms	-	GO:0005524/ATP binding	GO:0006094/gluconeogenesis	PF01293|PF01293|PF01293|PF01293	PTHR30031 PTHR30031:SF4|PTHR30031 PTHR30031:SF4|PTHR30031 PTHR30031:SF4|PTHR30031 PTHR30031:SF4	EC:4.1.1.32 EC:4.1.1.49|EC:4.1.1.32 EC:4.1.1.49|EC:4.1.1.32 EC:4.1.1.49|EC:4.1.1.32 EC:4.1.1.49	AT4G37870|AT4G37870|AT4G37870|AT4G37870	phosphoenolpyruvate carboxykinase 1|phosphoenolpyruvate carboxykinase 1|phosphoenolpyruvate carboxykinase 1|phosphoenolpyruvate carboxykinase 1
Potri.005G206901	2.64537	54.8757	4.37463	2.8976e-13	1.17324e-11	yes	Chr05:21164570-21164716	+	Chr05:21164570-21164716	+	-	-	-	-	-	-
Potri.011G101401	80.7575	14.8629	-2.44188	3.04445e-13	1.23106e-11	yes	Chr11:12870722-12877977	+	Chr11:12870722-12877977	+	-	-	-	-	-	-	PF00067	PTHR24282 PTHR24282:SF53	EC:1.14.13.173	AT3G14630	cytochrome P450, family 72, subfamily A, polypeptide 9
Potri.002G162400	106.121	27.8026	-1.93243	3.08965e-13	1.24768e-11	yes	Chr02:12429434-12431887	+	Chr02:12429434-12431887	+	-	-	-	-	GO:0004650/polygalacturonase activity	GO:0005975/carbohydrate metabolic process	PF12708|PF12708|PF00295	PTHR31339 PTHR31339:SF12|PTHR31339 PTHR31339:SF12|PTHR31339 PTHR31339:SF12		AT3G61490|AT3G61490|AT3G61490	Pectin lyase-like superfamily protein|Pectin lyase-like superfamily protein|Pectin lyase-like superfamily protein
Potri.001G346800	56.3954	0	-8.40088	3.18459e-13	1.28431e-11	yes	Chr01:35823382-35826104	-	Chr01:35823382-35826104	-	09100 Metabolism	09101 Carbohydrate metabolism	ko00040 Pentose and glucuronate interconversions	-	GO:0004650/polygalacturonase activity	GO:0005975/carbohydrate metabolic process	PF00295	PTHR31375 PTHR31375:SF34	EC:3.2.1.15
Potri.005G116600	175.938	357.637	1.02343	3.20209e-13	1.28966e-11	yes	Chr05:8489961-8491046	+	Chr05:8489961-8491046	+	09180 Brite Hierarchies	09182 Protein families: genetic information processing	ko03036 Chromosome and associated proteins	GO:0000786/nucleosome|GO:0005634/nucleus	GO:0003677/DNA binding	GO:0006334/nucleosome assembly	PF00538	PTHR11467 PTHR11467:SF50		AT2G18050	histone H1-3
Potri.001G162800	128.351	40.4981	-1.66416	3.2739e-13	1.31683e-11	yes	Chr01:13809910-13814838	+	Chr01:13809910-13814838	+	09100 Metabolism|09180 Brite Hierarchies	09102 Energy metabolism|09105 Amino acid metabolism|09181 Protein families: metabolism	ko00710 Carbon fixation in photosynthetic organisms|ko00250 Alanine, aspartate and glutamate metabolism|ko00220 Arginine biosynthesis|ko01007 Amino acid related enzymes	-	GO:0030170/pyridoxal phosphate binding|GO:0016769/transferase activity, transferring nitrogenous groups	GO:0009058/biosynthetic process	PF00155	PTHR11751 PTHR11751:SF369	EC:2.6.1.2	AT1G72330	alanine aminotransferase 2
Potri.009G155300	4.27754	59.5961	3.80037	3.40034e-13	1.36588e-11	yes	Chr09:12136788-12137590	-	Chr09:12136788-12137590	-	-	-	-	-	-	-	PF11347	PTHR36799 PTHR36799:SF2		AT5G20935	(1 of 1) PF11347 - Protein of unknown function (DUF3148) (DUF3148)
Potri.013G157900	93.272	21.1211	-2.14276	3.40999e-13	1.36796e-11	yes	Chr13:15271321-15276091	-	Chr13:15271321-15276091	-	09100 Metabolism|09180 Brite Hierarchies	09108 Metabolism of cofactors and vitamins|09110 Biosynthesis of other secondary metabolites|09181 Protein families: metabolism	ko00130 Ubiquinone and other terpenoid-quinone biosynthesis|ko00940 Phenylpropanoid biosynthesis|ko00945 Stilbenoid, diarylheptanoid and gingerol biosynthesis|ko00941 Flavonoid biosynthesis|ko00199 Cytochrome P450	-	GO:0020037/heme binding|GO:0009055/electron transfer activity|GO:0016705/oxidoreductase activity, acting on paired donors, with incorporation or reduction of molecular oxygen	GO:0055114/oxidation-reduction process	PF00067	PTHR24298 PTHR24298:SF56	EC:1.14.13.11	AT2G30490	cinnamate-4-hydroxylase
Potri.017G084200	47.4616	0	-5.63687	3.42653e-13	1.37278e-11	yes	Chr17:9682157-9685214	-	Chr17:9682157-9685214	-	-	-	-	GO:0005840/ribosome|GO:0005622/intracellular	GO:0003735/structural constituent of ribosome	GO:0006412/translation	PF07891	PTHR10759 PTHR10759:SF12		AT3G01175	Protein of unknown function (DUF1666)
Potri.008G010400	16.3628	90.7278	2.47112	3.8595e-13	1.54218e-11	yes	Chr08:502439-506390	+	Chr08:502439-506390	+	-	-	-	-	-	-		PTHR31096 PTHR31096:SF16|PTHR31096 PTHR31096:SF16		AT1G16880|AT1G16880	uridylyltransferase-related|uridylyltransferase-related
Potri.009G045500	2.80848	54.8169	4.28676	4.00612e-13	1.59866e-11	yes	Chr09:5180078-5182291	-	Chr09:5180078-5182291	-	09100 Metabolism|09180 Brite Hierarchies	09109 Metabolism of terpenoids and polyketides|09181 Protein families: metabolism	ko00900 Terpenoid backbone biosynthesis|ko01006 Prenyltransferases	-	GO:0016765/transferase activity, transferring alkyl or aryl (other than methyl) groups	-	PF01255	PTHR10291 PTHR10291:SF6		AT5G58770	Undecaprenyl pyrophosphate synthetase family protein
Potri.002G256400	7.97249	69.8691	3.13155	4.00929e-13	1.59783e-11	yes	Chr02:24526912-24528319	-	Chr02:24526912-24528319	-	09100 Metabolism|09180 Brite Hierarchies	09102 Energy metabolism|09181 Protein families: metabolism	ko00195 Photosynthesis|ko00194 Photosynthesis proteins	GO:0016020/membrane|GO:0009654/photosystem II oxygen evolving complex	-	GO:0015979/photosynthesis	PF03912	PTHR34963 PTHR34963:SF2		AT4G28660	photosystem II reaction center PSB28 protein
Potri.001G380000	52.8466	3.41244	-3.95293	4.02556e-13	1.60221e-11	yes	Chr01:40025385-40026744	-	Chr01:40025385-40026744	-	-	-	-	-	-	-	PF13668	PTHR31694 PTHR31694:SF6		AT3G62730	(1 of 2) PF13668 - Ferritin-like domain (Ferritin_2)
Potri.003G138700	5.87855	63.9369	3.44311	4.22501e-13	1.6794e-11	yes	Chr03:15533054-15533752	+	Chr03:15533054-15533752	+	-	-	-	-	-	GO:0006950/response to stress|GO:0009415/response to water
Potri.006G061700	90.5099	19.9931	-2.17857	4.52932e-13	1.79801e-11	yes	Chr06:4392093-4401675	-	Chr06:4392093-4401675	-	-	-	-	-	GO:0005515/protein binding	-	PF13306 PF13855|PF13306 PF13855|PF13306 PF13855|PF13306 PF13855|PF13306 PF13855	PTHR24006 PTHR24006:SF451|PTHR24006 PTHR24006:SF451|PTHR24006 PTHR24006:SF451|PTHR24006 PTHR24006:SF451|PTHR24006 PTHR24006:SF451		AT1G15740|AT1G15740|AT1G15740|AT1G15740|AT1G15740	Leucine-rich repeat family protein|Leucine-rich repeat family protein|Leucine-rich repeat family protein|Leucine-rich repeat family protein|Leucine-rich repeat family protein
Potri.015G088500	5.86143	63.7349	3.44276	4.60845e-13	1.82704e-11	yes	Chr15:11197319-11201458	-	Chr15:11197319-11201458	-	-	-	-	-	GO:0003824/catalytic activity	GO:0008152/metabolic process	PF13419	PTHR18901 PTHR18901:SF9	EC:3.1.3.23 EC:3.1.3.68	AT3G48420	Haloacid dehalogenase-like hydrolase (HAD) superfamily protein
Potri.006G123400	53.0634	0	-7.94953	4.61024e-13	1.82537e-11	yes	Chr06:9831883-9833944	+	Chr06:9831883-9833944	+	09180 Brite Hierarchies	09182 Protein families: genetic information processing	ko03000 Transcription factors	-	GO:0003677/DNA binding	-	PF00249	PTHR10641 PTHR10641:SF561		AT2G36890	Duplicated homeodomain-like superfamily protein
Potri.006G222800	109.232	29.9827	-1.86519	4.69566e-13	1.85677e-11	yes	Chr06:22816146-22820907	-	Chr06:22816146-22820907	-	09140 Cellular Processes	09141 Transport and catabolism	ko04146 Peroxisome	-	-	-	PF05721	PTHR20883	EC:1.14.11.18	AT2G01490	phytanoyl-CoA dioxygenase (PhyH) family protein
Potri.016G049600	93.9464	21.7882	-2.10829	4.70747e-13	1.85902e-11	yes	Chr16:3224892-3226549	+	Chr16:3224892-3226549	+	-	-	-	-	GO:0005515/protein binding	-	PF08263	PTHR27000 PTHR27000:SF136		AT5G06870	polygalacturonase inhibiting protein 2
Potri.001G142800	55.9235	4.66892	-3.58229	4.91713e-13	1.9393e-11	yes	Chr01:11722402-11723304	-	Chr01:11722402-11723304	-	-	-	-	-	-	-	PF03479	PTHR31100 PTHR31100:SF14		AT4G17800	Predicted AT-hook DNA-binding family protein
Potri.005G187600	47.4862	1.46518	-5.01836	4.97145e-13	1.95818e-11	yes	Chr05:19522183-19523887	-	Chr05:19522183-19523887	-	09100 Metabolism|09180 Brite Hierarchies	09103 Lipid metabolism|09181 Protein families: metabolism	ko00061 Fatty acid biosynthesis|ko01040 Biosynthesis of unsaturated fatty acids|ko01004 Lipid biosynthesis proteins	-	GO:0045300/acyl-[acyl-carrier-protein] desaturase activity	GO:0055114/oxidation-reduction process|GO:0006631/fatty acid metabolic process	PF03405	PTHR31155 PTHR31155:SF3	EC:1.14.19.2	AT1G43800	Plant stearoyl-acyl-carrier-protein desaturase family protein
Potri.012G127400	52.6474	0	-7.93883	5.52743e-13	2.17436e-11	yes	Chr12:14333474-14334280	+	Chr12:14333474-14334280	+	-	-	-	-	GO:0004857/enzyme inhibitor activity|GO:0030599/pectinesterase activity	-	PF04043	PTHR31080 PTHR31080:SF15	EC:3.1.1.11	AT5G51520	Plant invertase/pectin methylesterase inhibitor superfamily protein
Potri.018G031100	0	63.2843	9.25442	6.33191e-13	2.48761e-11	yes	Chr18:2289949-2293576	-	Chr18:2289949-2293576	-	-	-	-	-	-	-	PF04862|PF04862	PTHR31265 PTHR31265:SF3|PTHR31265 PTHR31265:SF3		AT4G32460|AT4G32460	Protein of unknown function, DUF642|Protein of unknown function, DUF642
Potri.016G000600	2.94383	54.3319	4.20603	6.75999e-13	2.65236e-11	yes	Chr16:33098-34829	+	Chr16:33098-34829	+	-	-	-	-	GO:0004190/aspartic-type endopeptidase activity	GO:0006508/proteolysis	PF00026|PF00026	PTHR13683 PTHR13683:SF267|PTHR13683 PTHR13683:SF267	EC:3.4.23.12|EC:3.4.23.12
Potri.009G060500	14.6867	85.6362	2.54371	7.10142e-13	2.78273e-11	yes	Chr09:6259632-6267953	+	Chr09:6259632-6267953	+	09190 Not Included in Pathway or Brite	09191 Unclassified: metabolism	ko99980 Enzymes with EC numbers	-	-	-	PF03055|PF03055	PTHR10543 PTHR10543:SF37|PTHR10543 PTHR10543:SF37		AT3G63520|AT3G63520	carotenoid cleavage dioxygenase 1|carotenoid cleavage dioxygenase 1
Potri.006G216200	4.1735	57.8433	3.79282	7.80758e-13	3.05551e-11	yes	Chr06:22182284-22183568	+	Chr06:22182284-22183568	+	-	-	-	-	-	-	PF13639	PTHR22763 PTHR22763:SF20	EC:6.3.2.19	AT5G02750	RING/U-box superfamily protein
Potri.003G136700	0	50.6423	7.05781	8.07942e-13	3.15783e-11	yes	Chr03:15409430-15409860	-	Chr03:15409430-15409860	-	-	-	-	-	-	-		PTHR33513 PTHR33513:SF4		AT5G41761	(1 of 3) PTHR33513:SF4 - GB
Potri.019G088401	56.8794	5.34932	-3.41048	8.21167e-13	3.2054e-11	yes	Chr19:12725385-12728218	+	Chr19:12725385-12728218	+	09190 Not Included in Pathway or Brite	09191 Unclassified: metabolism	ko99980 Enzymes with EC numbers	-	-	-	PF00394 PF07731 PF07732	PTHR11709 PTHR11709:SF118	EC:1.10.3.2
Potri.004G175000	17.7242	92.2591	2.37997	8.44003e-13	3.29031e-11	yes	Chr04:19034760-19036302	+	Chr04:19034760-19036302	+	-	-	-	-	GO:0016881/acid-amino acid ligase activity	-	PF00179	PTHR24068	EC:6.3.2.19
Potri.002G034500	121.084	37.4604	-1.69258	8.48855e-13	3.30499e-11	yes	Chr02:2282401-2283642	-	Chr02:2282401-2283642	-	-	-	-	-	-	-		PTHR33872 PTHR33872:SF2		AT1G19530
Potri.017G028100	10.8242	75.8269	2.80845	8.95347e-13	3.48155e-11	yes	Chr17:1838484-1840603	+	Chr17:1838484-1840603	+	-	-	-	-	GO:0020037/heme binding|GO:0009055/electron transfer activity|GO:0016705/oxidoreductase activity, acting on paired donors, with incorporation or reduction of molecular oxygen	GO:0055114/oxidation-reduction process	PF00067	PTHR24298 PTHR24298:SF155
Potri.018G131500	7.3419	66.6443	3.18226	9.28178e-13	3.6046e-11	yes	Chr18:14167252-14169914	+	Chr18:14167252-14169914	+	-	-	-	-	-	-	PF03105	PTHR10783 PTHR10783:SF44		AT2G26660	SPX domain gene 2
Potri.010G215900	13.6764	82.7203	2.59655	9.32289e-13	3.61595e-11	yes	Chr10:20297763-20298814	-	Chr10:20297763-20298814	-	09120 Genetic Information Processing|09180 Brite Hierarchies	09122 Translation|09182 Protein families: genetic information processing	ko03010 Ribosome|ko03011 Ribosome	GO:0005622/intracellular	-	GO:0042254/ribosome biogenesis	PF00466	PTHR11560 PTHR11560:SF8		AT5G13510	Ribosomal protein L10 family protein
Potri.010G127300	19.5531	96.0367	2.29619	9.66577e-13	3.74416e-11	yes	Chr10:14431292-14432684	-	Chr10:14431292-14432684	-	09180 Brite Hierarchies	09182 Protein families: genetic information processing	ko03011 Ribosome	GO:0005840/ribosome|GO:0005622/intracellular|GO:0009536/plastid	GO:0003735/structural constituent of ribosome	GO:0006412/translation	PF04839	PTHR35108		AT1G68590	Ribosomal protein PSRP-3/Ycf65
Potri.008G145500	12.1696	78.9755	2.69813	9.87914e-13	3.81709e-11	yes	Chr08:9908177-9910463	+	Chr08:9908177-9910463	+	-	-	-	-	-	-	PF02617	PTHR33473 PTHR33473:SF1
Potri.019G130433	18.7926	94.3156	2.32733	9.89571e-13	3.81864e-11	yes	Chr19:15302522-15303576	+	Chr19:15302522-15303576	+	09100 Metabolism|09150 Organismal Systems|09160 Human Diseases|09180 Brite Hierarchies	09106 Metabolism of other amino acids|09111 Xenobiotics biodegradation and metabolism|09149 Aging|09161 Cancer: overview|09162 Cancer: specific types|09166 Cardiovascular disease|09176 Drug resistance: antineoplastic|09183 Protein families: signaling and cellular processes	ko00480 Glutathione metabolism|ko00980 Metabolism of xenobiotics by cytochrome P450|ko00982 Drug metabolism - cytochrome P450|ko00983 Drug metabolism - other enzymes|ko04212 Longevity regulating pathway - worm|ko05200 Pathways in cancer|ko05204 Chemical carcinogenesis|ko05225 Hepatocellular carcinoma|ko05418 Fluid shear stress and atherosclerosis|ko01524 Platinum drug resistance|ko02000 Transport…	-	-	-	PF00043 PF02798	PTHR11260 PTHR11260:SF297	EC:2.5.1.18
Potri.007G034300	14.686	84.9305	2.53185	1.01853e-12	3.92541e-11	yes	Chr07:2680083-2680968	-	Chr07:2680083-2680968	-	-	-	-	-	-	-		PTHR36734 PTHR36734:SF1		AT2G23670	homolog of Synechocystis YCF37
Potri.003G219000	6.9599	65.3534	3.23112	1.06167e-12	4.0865e-11	yes	Chr03:21375980-21379283	+	Chr03:21375980-21379283	+	-	-	-	-	GO:0016491/oxidoreductase activity|GO:0051537/2 iron, 2 sulfur cluster binding|GO:0010277/chlorophyllide a oxygenase [overall] activity	GO:0055114/oxidation-reduction process	PF00355 PF08417	PTHR21266 PTHR21266:SF25	EC:1.14.12.20
Potri.003G156500	0	52.9038	7.80352	1.09022e-12	4.19106e-11	yes	Chr03:16748913-16751735	+	Chr03:16748913-16751735	+	09120 Genetic Information Processing|09180 Brite Hierarchies	09124 Replication and repair|09182 Protein families: genetic information processing	ko03410 Base excision repair|ko03400 DNA repair and recombination proteins	-	GO:0008725/DNA-3-methyladenine glycosylase activity	GO:0006284/base-excision repair	PF03352	PTHR31116 PTHR31116:SF4	EC:3.2.2.20	AT5G44680	DNA glycosylase superfamily protein
Potri.004G200100	6.44529	63.8683	3.30878	1.0931e-12	4.19686e-11	yes	Chr04:21059818-21061470	+	Chr04:21059818-21061470	+	-	-	-	-	GO:0016491/oxidoreductase activity|GO:0050662/coenzyme binding	GO:0044237/cellular metabolic process	PF13561	PTHR24322 PTHR24322:SF401	EC:1.1.1.198
Potri.017G111000	21.6166	100.182	2.21241	1.12777e-12	4.32448e-11	yes	Chr17:11868559-11869474	+	Chr17:11868559-11869474	+	-	-	-	-	-	-		PTHR34023 PTHR34023:SF1
Potri.006G062100	0	48.8761	6.61106	1.13502e-12	4.3468e-11	yes	Chr06:4424162-4424811	+	Chr06:4424162-4424811	+	-	-	-	-	-	-	PF05617	PTHR31181		AT5G54062	(1 of 6) PTHR31181:SF51 - CYSTEINE RICH PEPTIDE-RELATED
Potri.008G065000	64.1488	8.52127	-2.91228	1.1975e-12	4.58032e-11	yes	Chr08:3932740-3934608	+	Chr08:3932740-3934608	+	-	-	-	-	GO:0016747/transferase activity, transferring acyl groups other than amino-acyl groups	-	PF02458	PTHR31896 PTHR31896:SF11	EC:2.3.1.133	AT2G39980	HXXXD-type acyl-transferase family protein
Potri.003G066800	0	57.8551	8.72082	1.20387e-12	4.5989e-11	yes	Chr03:9400869-9403112	-	Chr03:9400869-9403112	-	-	-	-	-	GO:0020037/heme binding|GO:0009055/electron transfer activity|GO:0016705/oxidoreductase activity, acting on paired donors, with incorporation or reduction of molecular oxygen	GO:0055114/oxidation-reduction process	PF00067	PTHR24298 PTHR24298:SF51	EC:1.14.13.88
Potri.001G060400	49.5602	2.89826	-4.09592	1.28198e-12	4.89116e-11	yes	Chr01:4618087-4619470	-	Chr01:4618087-4619470	-	09130 Environmental Information Processing	09132 Signal transduction	ko04075 Plant hormone signal transduction	-	-	-	PF02519	PTHR31374 PTHR31374:SF10
Potri.017G054300	127.854	42.0287	-1.60506	1.2911e-12	4.91976e-11	yes	Chr17:4141147-4143855	-	Chr17:4141147-4143855	-	-	-	-	-	GO:0020037/heme binding	-	PF00173	PTHR19359 PTHR19359:SF22		AT2G32720	cytochrome B5 isoform B
Potri.002G029900	6.88953	64.8002	3.23352	1.29813e-12	4.94037e-11	yes	Chr02:1992264-1993998	-	Chr02:1992264-1993998	-	-	-	-	-	GO:0004176/ATP-dependent peptidase activity	GO:0006508/proteolysis	PF02190	PTHR23327 PTHR23327:SF12	EC:3.4.21.53	AT1G19740	ATP-dependent protease La (LON) domain protein
Potri.003G141700	0	47.7673	5.82343	1.36633e-12	5.19341e-11	yes	Chr03:15741578-15743196	+	Chr03:15741578-15743196	+	-	-	-	-	-	-		PTHR12446		AT5G42070	(1 of 9) PTHR12446 - TESMIN/TSO1-RELATED
Potri.014G193800	6.15692	62.6394	3.34679	1.38325e-12	5.25116e-11	yes	Chr14:17177181-17180370	-	Chr14:17177181-17180370	-	09100 Metabolism|09160 Human Diseases	09101 Carbohydrate metabolism|09102 Energy metabolism|09103 Lipid metabolism|09105 Amino acid metabolism|09108 Metabolism of cofactors and vitamins|09111 Xenobiotics biodegradation and metabolism|09161 Cancer: overview	ko00010 Glycolysis / Gluconeogenesis|ko00680 Methane metabolism|ko00071 Fatty acid degradation|ko00350 Tyrosine metabolism|ko00830 Retinol metabolism|ko00625 Chloroalkane and chloroalkene degradation|ko00626 Naphthalene degradation|ko00980 Metabolism of xenobiotics by cytochrome P450|ko00982 Drug metabolism - cytochrome P450|ko05204 Chemical carcinogenesis	-	GO:0008270/zinc ion binding|GO:0016491/oxidoreductase activity	GO:0055114/oxidation-reduction process	PF00107 PF08240	PTHR11695 PTHR11695:SF269	EC:1.1.1.1 EC:1.1.1.284 EC:1.2.1.1	AT5G43940	GroES-like zinc-binding dehydrogenase family protein
Potri.004G019000	0	49.2796	6.95723	1.40741e-12	5.33621e-11	yes	Chr04:1360019-1361948	+	Chr04:1360019-1361948	+	-	-	-	-	GO:0020037/heme binding|GO:0009055/electron transfer activity|GO:0016705/oxidoreductase activity, acting on paired donors, with incorporation or reduction of molecular oxygen	GO:0055114/oxidation-reduction process	PF00067	PTHR24298 PTHR24298:SF54
Potri.004G179457	54.5514	4.81519	-3.50195	1.44298e-12	5.46428e-11	yes	Chr04:19364072-19368921	-	Chr04:19364072-19368921	-	-	-	-	-	-	-	PF07714	PTHR23257 PTHR23257:SF347	EC:2.7.12.1
Potri.010G161400	15.453	85.9652	2.47586	1.48922e-12	5.63237e-11	yes	Chr10:16683775-16686039	+	Chr10:16683775-16686039	+	-	-	-	-	-	-		PTHR36730		AT2G03420
Potri.004G220100	212.672	98.2219	-1.11451	1.52742e-12	5.76966e-11	yes	Chr04:22580740-22581054	-	Chr04:22580740-22581054	-	-	-	-	-	GO:0003677/DNA binding	GO:0006355/regulation of transcription, DNA-templated	PF02362			AT3G53310	AP2/B3-like transcriptional factor family protein
Potri.002G156800	49.8877	3.13588	-3.99174	1.56373e-12	5.8995e-11	yes	Chr02:11946047-11948402	+	Chr02:11946047-11948402	+	09100 Metabolism	09109 Metabolism of terpenoids and polyketides	ko00902 Monoterpenoid biosynthesis	-	GO:0016491/oxidoreductase activity	GO:0008152/metabolic process	PF00106	PTHR24322 PTHR24322:SF442
Potri.005G115000	16.4934	88.2231	2.41927	1.58214e-12	5.96155e-11	yes	Chr05:8403883-8404676	+	Chr05:8403883-8404676	+	-	-	-	-	-	-		PTHR36347		AT2G17972	(1 of 1) PTHR36347:SF1 - EXPRESSED PROTEIN
Potri.011G101250	64.0917	8.73171	-2.8758	1.65841e-12	6.24121e-11	yes	Chr11:12859142-12869356	+	Chr11:12859142-12869356	+	-	-	-	-	-	-	PF00067	PTHR24282 PTHR24282:SF53	EC:1.3.3.9	AT3G14630	cytochrome P450, family 72, subfamily A, polypeptide 9
Potri.009G140500	7.6824	66.5013	3.11375	1.68177e-12	6.3213e-11	yes	Chr09:11253057-11254469	+	Chr09:11253057-11254469	+	09180 Brite Hierarchies	09183 Protein families: signaling and cellular processes	ko02044 Secretion system	-	GO:0005515/protein binding	-	PF00385 PF13857	PTHR24128 PTHR24128:SF11	EC:3.6.5.4	AT2G47450	chloroplast signal recognition particle component (CAO)
Potri.015G094700	114.284	34.3955	-1.73233	1.71581e-12	6.44127e-11	yes	Chr15:11685564-11690004	+	Chr15:11685564-11690004	+	-	-	-	-	GO:0005515/protein binding	-	PF00571	PTHR13780 PTHR13780:SF36		AT3G48530	SNF1-related protein kinase regulatory subunit gamma 1
Potri.013G122400	0	67.0294	9.95867	1.71722e-12	6.43863e-11	yes	Chr13:13162106-13163838	-	Chr13:13162106-13163838	-	-	-	-	-	GO:0046983/protein dimerization activity|GO:0008171/O-methyltransferase activity	-	PF00891 PF08100	PTHR11746 PTHR11746:SF99
Potri.013G138000	6.73039	63.8488	3.2459	1.72879e-12	6.47402e-11	yes	Chr13:15632925-15634448	-	Chr13:15632925-15634448	-	09100 Metabolism|09180 Brite Hierarchies	09102 Energy metabolism|09181 Protein families: metabolism	ko00190 Oxidative phosphorylation|ko00195 Photosynthesis|ko00194 Photosynthesis proteins	GO:0033178/proton-transporting two-sector ATPase complex, catalytic domain	GO:0016820/ATPase activity, coupled to transmembrane movement of substances|GO:0005524/ATP binding|GO:0046961/proton-transporting ATPase activity, rotational mechanism|GO:0046933/proton-transporting ATP synthase activity, rotational mechanism	GO:0015992/proton transmembrane transport|GO:0015991/ATP hydrolysis coupled proton transport|GO:0046034/ATP metabolic process	PF00006 PF00306 PF02874	PTHR15184 PTHR15184:SF42	EC:3.6.3.14	ATCG00120	ATP synthase subunit alpha
Potri.014G068200	81.2434	206.936	1.34886	1.73331e-12	6.48297e-11	yes	Chr14:4309681-4314048	+	Chr14:4309681-4314048	+	09100 Metabolism	09101 Carbohydrate metabolism|09102 Energy metabolism|09109 Metabolism of terpenoids and polyketides	ko00030 Pentose phosphate pathway|ko00710 Carbon fixation in photosynthetic organisms|ko01051 Biosynthesis of ansamycins	-	GO:0003824/catalytic activity	GO:0008152/metabolic process	PF00456 PF02779 PF02780|PF00456 PF02779 PF02780	PTHR11624 PTHR11624:SF81|PTHR11624 PTHR11624:SF81	EC:2.2.1.1 EC:2.2.1.2|EC:2.2.1.1 EC:2.2.1.2	AT3G60750|AT3G60750	Transketolase|Transketolase
Potri.002G055500	2.99487	52.8664	4.14179	1.73518e-12	6.48197e-11	yes	Chr02:3783809-3787271	-	Chr02:3783809-3787271	-	-	-	-	-	GO:0016491/oxidoreductase activity	GO:0055114/oxidation-reduction process	PF00248	PTHR11732 PTHR11732:SF213	EC:1.1.1.65	AT1G06690	NAD(P)-linked oxidoreductase superfamily protein
Potri.014G059800	0	134.471	13.9483	2.08761e-12	7.78895e-11	yes	Chr14:3831825-3832542	+	Chr14:3831825-3832542	+	-	-	-	-	-	-	PF14547	PTHR31731 PTHR31731:SF21		AT4G00165	Bifunctional inhibitor/lipid-transfer protein/seed storage 2S albumin superfamily protein
Potri.004G031700	82.116	17.2564	-2.25054	2.12723e-12	7.92705e-11	yes	Chr04:2438297-2440305	+	Chr04:2438297-2440305	+	09150 Organismal Systems|09160 Human Diseases|09180 Brite Hierarchies	09151 Immune system|09166 Cardiovascular disease|09182 Protein families: genetic information processing	ko04621 NOD-like receptor signaling pathway|ko05418 Fluid shear stress and atherosclerosis|ko03110 Chaperones and folding catalysts	-	GO:0015035/protein disulfide oxidoreductase activity|GO:0009055/electron transfer activity	GO:0006662/glycerol ether metabolic process|GO:0045454/cell redox homeostasis	PF00085	PTHR10438 PTHR10438:SF242	EC:1.6.5.4	AT1G11530	C-terminal cysteine residue is changed to a serine 1
Potri.016G019100	96.1194	24.526	-1.97052	2.17452e-12	8.09337e-11	yes	Chr16:1024748-1025439	+	Chr16:1024748-1025439	+	-	-	-	-	-	-
Potri.014G143400	9.78476	71.5173	2.86968	2.2058e-12	8.19975e-11	yes	Chr14:9792673-9798384	+	Chr14:9792673-9798384	+	-	-	-	-	GO:0031072/heat shock protein binding	-	PF00226 PF13370	PTHR24078 PTHR24078:SF255		AT2G42750	DNAJ heat shock N-terminal domain-containing protein
Potri.011G066900	3.02674	52.4629	4.11546	2.32248e-12	8.62296e-11	yes	Chr11:5836532-5840942	+	Chr11:5836532-5840942	+	-	-	-	-	GO:0008234/cysteine-type peptidase activity	GO:0006508/proteolysis	PF00112 PF00396 PF08246	PTHR12411 PTHR12411:SF371	EC:3.4.22.14
Potri.010G171500	11.2747	75.085	2.73543	2.41549e-12	8.95734e-11	yes	Chr10:17299582-17303662	+	Chr10:17299582-17303662	+	09100 Metabolism|09130 Environmental Information Processing|09180 Brite Hierarchies	09101 Carbohydrate metabolism|09102 Energy metabolism|09132 Signal transduction|09183 Protein families: signaling and cellular processes	ko00010 Glycolysis / Gluconeogenesis|ko00710 Carbon fixation in photosynthetic organisms|ko04066 HIF-1 signaling pathway|ko04147 Exosome	-	GO:0004618/phosphoglycerate kinase activity	GO:0006096/glycolytic process	PF00162	PTHR11406 PTHR11406:SF8	EC:2.7.2.3	AT1G56190	Phosphoglycerate kinase family protein
Potri.002G134300	5.80147	60.6312	3.38557	2.43744e-12	9.02774e-11	yes	Chr02:10121042-10126927	-	Chr02:10121042-10126927	-	-	-	-	-	-	-		PTHR23172 PTHR23172:SF36|PTHR23172 PTHR23172:SF36|PTHR23172 PTHR23172:SF36|PTHR23172 PTHR23172:SF36|PTHR23172 PTHR23172:SF36		AT1G75100|AT1G75100|AT1G75100|AT1G75100|AT1G75100	J-domain protein required for chloroplast accumulation response 1|J-domain protein required for chloroplast accumulation response 1|J-domain protein required for chloroplast accumulation response 1|J-domain protein required for chloroplast accumulation response 1|J-domain protein required for chloroplast accumulation response 1
Potri.015G147300	0	50.0604	7.52814	2.48791e-12	9.20347e-11	yes	Chr15:15122581-15125090	-	Chr15:15122581-15125090	-	09190 Not Included in Pathway or Brite	09191 Unclassified: metabolism	ko99980 Enzymes with EC numbers	-	GO:0016747/transferase activity, transferring acyl groups other than amino-acyl groups	-	PF02458	PTHR31896 PTHR31896:SF4	EC:2.3.1.99	AT5G23940	HXXXD-type acyl-transferase family protein
Potri.010G112800	2.82388	51.6875	4.19406	2.53534e-12	9.3675e-11	yes	Chr10:13262670-13267196	+	Chr10:13262670-13267196	+	09180 Brite Hierarchies	09183 Protein families: signaling and cellular processes	ko02000 Transporters	GO:0016021/integral component of membrane	-	GO:0055085/transmembrane transport	PF03547|PF03547	PTHR31752 PTHR31752:SF12|PTHR31752 PTHR31752:SF12		AT1G23080|AT1G23080	Auxin efflux carrier family protein|Auxin efflux carrier family protein
Potri.001G270900	61.701	8.04035	-2.93996	2.56948e-12	9.48211e-11	yes	Chr01:28546908-28549073	-	Chr01:28546908-28549073	-	-	-	-	-	GO:0020037/heme binding|GO:0009055/electron transfer activity|GO:0016705/oxidoreductase activity, acting on paired donors, with incorporation or reduction of molecular oxygen	GO:0055114/oxidation-reduction process	PF00067	PTHR24298 PTHR24298:SF59		AT3G20120	cytochrome P450, family 705, subfamily A, polypeptide 21
Potri.006G063000	32.7668	120.904	1.88356	2.66282e-12	9.81467e-11	yes	Chr06:4493577-4499021	-	Chr06:4493577-4499021	-	-	-	-	GO:0016020/membrane	GO:0004427/inorganic diphosphatase activity|GO:0009678/hydrogen-translocating pyrophosphatase activity	GO:0015992/proton transmembrane transport	PF03030|PF03030|PF03030|PF03030|PF03030|PF03030	PTHR31998 PTHR31998:SF14|PTHR31998 PTHR31998:SF14|PTHR31998 PTHR31998:SF14|PTHR31998 PTHR31998:SF14|PTHR31998 PTHR31998:SF14|PTHR31998 PTHR31998:SF14	EC:3.6.1.1|EC:3.6.1.1|EC:3.6.1.1|EC:3.6.1.1|EC:3.6.1.1|EC:3.6.1.1	AT1G15690|AT1G15690|AT1G15690|AT1G15690|AT1G15690|AT1G15690	Inorganic H pyrophosphatase family protein|Inorganic H pyrophosphatase family protein|Inorganic H pyrophosphatase family protein|Inorganic H pyrophosphatase family protein|Inorganic H pyrophosphatase family protein|Inorganic H pyrophosphatase family protein
Potri.016G116400	20.8034	96.559	2.21459	2.77558e-12	1.02179e-10	yes	Chr16:12074115-12077001	+	Chr16:12074115-12077001	+	09100 Metabolism	09108 Metabolism of cofactors and vitamins	ko00750 Vitamin B6 metabolism	-	-	-	PF01680|PF01680	PTHR31829|PTHR31829	EC:4.3.3.6|EC:4.3.3.6	AT5G01410|AT5G01410	Aldolase-type TIM barrel family protein|Aldolase-type TIM barrel family protein
Potri.014G179100	64.4319	9.26242	-2.79832	2.80399e-12	1.031e-10	yes	Chr14:13566243-13573358	-	Chr14:13566243-13573358	-	09100 Metabolism|09180 Brite Hierarchies	09109 Metabolism of terpenoids and polyketides|09181 Protein families: metabolism	ko00904 Diterpenoid biosynthesis|ko00199 Cytochrome P450	-	GO:0020037/heme binding|GO:0009055/electron transfer activity|GO:0016705/oxidoreductase activity, acting on paired donors, with incorporation or reduction of molecular oxygen	GO:0055114/oxidation-reduction process	PF00067	PTHR24286 PTHR24286:SF67		AT2G32440	ent-kaurenoic acid hydroxylase 2
Potri.016G132800	60.7267	0	-9.65068	2.84129e-12	1.04345e-10	yes	Chr16:13721834-13723610	+	Chr16:13721834-13723610	+	09100 Metabolism	09110 Biosynthesis of other secondary metabolites	ko00940 Phenylpropanoid biosynthesis	-	GO:0020037/heme binding|GO:0004601/peroxidase activity	GO:0055114/oxidation-reduction process|GO:0006979/response to oxidative stress	PF00141	PTHR31388 PTHR31388:SF30	EC:1.11.1.7
Potri.011G123700	60.6367	171.101	1.49659	2.88336e-12	1.05763e-10	yes	Chr11:15414506-15418705	-	Chr11:15414506-15418705	-	09140 Cellular Processes	09141 Transport and catabolism	ko04146 Peroxisome	GO:0016021/integral component of membrane	-	-	PF04117	PTHR11266 PTHR11266:SF16		AT1G52870	Peroxisomal membrane 22 kDa (Mpv17/PMP22) family protein
Potri.012G090000	0	46.4208	5.66659	2.88778e-12	1.05797e-10	yes	Chr12:11519000-11520978	+	Chr12:11519000-11520978	+	-	-	-	-	GO:0020037/heme binding|GO:0009055/electron transfer activity|GO:0016705/oxidoreductase activity, acting on paired donors, with incorporation or reduction of molecular oxygen	GO:0055114/oxidation-reduction process	PF00067	PTHR24298 PTHR24298:SF151	EC:1.14.13.121
Potri.015G037000	59.8655	7.36521	-3.02293	2.89918e-12	1.06087e-10	yes	Chr15:3169310-3188351	+	Chr15:3169310-3188351	+	-	-	-	-	GO:0008270/zinc ion binding|GO:0016491/oxidoreductase activity	GO:0005975/carbohydrate metabolic process	PF01116 PF03446 PF07005 PF14833 PF17042|PF01116 PF03446 PF07005 PF14833 PF17042|PF01116 PF03446 PF07005 PF14833 PF17042	PTHR22981 PTHR22981:SF27|PTHR22981 PTHR22981:SF27|PTHR22981 PTHR22981:SF27	EC:4.1.2.13|EC:4.1.2.13|EC:4.1.2.13	AT1G18270|AT1G18270|AT1G18270	ketose-bisphosphate aldolase class-II family protein|ketose-bisphosphate aldolase class-II family protein|ketose-bisphosphate aldolase class-II family protein
Potri.015G054600	1.22568	46.8908	5.25766	2.91534e-12	1.0655e-10	yes	Chr15:7464225-7466727	+	Chr15:7464225-7466727	+	-	-	-	GO:0005622/intracellular	GO:0005515/protein binding|GO:0008270/zinc ion binding	-	PF00643 PF06203	PTHR31874 PTHR31874:SF5		AT1G25440	B-box type zinc finger protein with CCT domain
Potri.013G026400	5.62036	59.791	3.41119	2.92904e-12	1.06922e-10	yes	Chr13:1711436-1713919	-	Chr13:1711436-1713919	-	-	-	-	-	-	-	PF04536	PTHR30373 PTHR30373:SF2	EC:3.1.3.2	AT1G54780	thylakoid lumen 18.3 kDa protein
Potri.010G220500	140.161	50.7869	-1.46456	2.96572e-12	1.08131e-10	yes	Chr10:20590565-20594814	+	Chr10:20590565-20594814	+	09180 Brite Hierarchies	09183 Protein families: signaling and cellular processes	ko04030 G protein-coupled receptors	GO:0016021/integral component of membrane	-	GO:0008219/cell death	PF03094	PTHR31942 PTHR31942:SF29		AT1G11310	Seven transmembrane MLO family protein
Potri.010G120600	44.0247	1.26156	-5.12503	3.10148e-12	1.12946e-10	yes	Chr10:13864831-13866884	+	Chr10:13864831-13866884	+	-	-	-	-	GO:0016787/hydrolase activity	GO:0006541/glutamine metabolic process	PF00117	PTHR11922 PTHR11922:SF38	EC:3.5.1.94	AT1G66860	Class I glutamine amidotransferase-like superfamily protein
Potri.015G006100	0	50.531	7.75079	3.10187e-12	1.12825e-10	yes	Chr15:366961-368981	+	Chr15:366961-368981	+	-	-	-	-	GO:0020037/heme binding|GO:0009055/electron transfer activity|GO:0016705/oxidoreductase activity, acting on paired donors, with incorporation or reduction of molecular oxygen	GO:0055114/oxidation-reduction process	PF00067	PTHR24298 PTHR24298:SF115
Potri.001G350900	36.9783	128.587	1.798	3.10877e-12	1.12941e-10	yes	Chr01:36343670-36347507	+	Chr01:36343670-36347507	+	09190 Not Included in Pathway or Brite	09191 Unclassified: metabolism	ko99980 Enzymes with EC numbers	-	-	GO:0055114/oxidation-reduction process	PF02943	PTHR35113	EC:1.8.7.2	AT2G04700	ferredoxin thioredoxin reductase catalytic beta chain family protein
Potri.014G053700	16.457	86.5357	2.3946	3.52897e-12	1.28054e-10	yes	Chr14:3443113-3445836	+	Chr14:3443113-3445836	+	-	-	-	-	-	-	PF03140|PF03140|PF03140|PF03140	PTHR31549 PTHR31549:SF2|PTHR31549 PTHR31549:SF2|PTHR31549 PTHR31549:SF2|PTHR31549 PTHR31549:SF2
Potri.001G151300	8.19168	66.4984	3.02109	3.56985e-12	1.29382e-10	yes	Chr01:12659301-12661882	-	Chr01:12659301-12661882	-	-	-	-	-	-	-	PF00504	PTHR14154 PTHR14154:SF14		AT5G47110	Chlorophyll A-B binding family protein
Potri.016G084000	10.2698	71.7089	2.80375	3.84907e-12	1.39336e-10	yes	Chr16:6524886-6527854	+	Chr16:6524886-6527854	+	-	-	-	-	-	-		PTHR36043 PTHR36043:SF1|PTHR36043 PTHR36043:SF1		AT3G53470|AT3G53470
Potri.002G215100	26.1415	106.891	2.03173	3.97599e-12	1.4376e-10	yes	Chr02:20099424-20103149	-	Chr02:20099424-20103149	-	09180 Brite Hierarchies	09181 Protein families: metabolism|09182 Protein families: genetic information processing	ko01002 Peptidases and inhibitors|ko03110 Chaperones and folding catalysts	GO:0016021/integral component of membrane	GO:0008270/zinc ion binding|GO:0005524/ATP binding|GO:0004222/metalloendopeptidase activity|GO:0016887/ATPase activity	GO:0006508/proteolysis	PF00004 PF01434 PF06480|PF00004 PF01434 PF06480	PTHR23076 PTHR23076:SF60|PTHR23076 PTHR23076:SF60		AT1G06430|AT1G06430	FTSH protease 8|FTSH protease 8
Potri.017G153200	96.844	25.5862	-1.92029	4.00109e-12	1.44495e-10	yes	Chr17:15072370-15073239	-	Chr17:15072370-15073239	-	-	-	-	-	GO:0004866/endopeptidase inhibitor activity	-	PF00197	PTHR33107 PTHR33107:SF5
Potri.014G041800	50.4725	0	-8.32012	4.39888e-12	1.58673e-10	yes	Chr14:2731547-2733329	+	Chr14:2731547-2733329	+	09180 Brite Hierarchies	09181 Protein families: metabolism	ko01003 Glycosyltransferases	-	GO:0016758/transferase activity, transferring hexosyl groups	GO:0008152/metabolic process	PF00201	PTHR11926 PTHR11926:SF381	EC:2.4.1.115
Potri.008G089000	72.4132	13.2787	-2.44714	4.73037e-12	1.70428e-10	yes	Chr08:5562647-5563762	-	Chr08:5562647-5563762	-	-	-	-	-	GO:0003677/DNA binding	GO:0006355/regulation of transcription, DNA-templated	PF02365	PTHR31719 PTHR31719:SF40		AT1G69490	NAC-like, activated by AP3/PI
Potri.016G143100	7.12842	63.0873	3.1457	4.87421e-12	1.75402e-10	yes	Chr16:14517656-14518725	-	Chr16:14517656-14518725	-	09120 Genetic Information Processing|09180 Brite Hierarchies	09122 Translation|09182 Protein families: genetic information processing	ko03010 Ribosome|ko03011 Ribosome	GO:0005840/ribosome|GO:0005622/intracellular	GO:0003735/structural constituent of ribosome	GO:0006412/translation	PF01196	PTHR14413		AT3G54210	Ribosomal protein L17 family protein
Potri.001G015500	0	45.6711	6.51321	5.63422e-12	2.02512e-10	yes	Chr01:1141818-1147304	-	Chr01:1141818-1147304	-	09100 Metabolism	09103 Lipid metabolism	ko00591 Linoleic acid metabolism|ko00592 alpha-Linolenic acid metabolism	-	GO:0046872/metal ion binding|GO:0005515/protein binding|GO:0016702/oxidoreductase activity, acting on single donors with incorporation of molecular oxygen, incorporation of two atoms of oxygen	GO:0055114/oxidation-reduction process	PF00305 PF01477	PTHR11771 PTHR11771:SF42	EC:1.13.11.12	AT3G45140	lipoxygenase 2
Potri.001G220800	174.696	74.4714	-1.23009	5.67959e-12	2.03902e-10	yes	Chr01:23035632-23038364	+	Chr01:23035632-23038364	+	09130 Environmental Information Processing|09140 Cellular Processes|09150 Organismal Systems|09160 Human Diseases	09132 Signal transduction|09144 Cellular community - eukaryotes|09152 Endocrine system|09149 Aging|09159 Environmental adaptation|09166 Cardiovascular disease|09167 Endocrine and metabolic disease	ko04371 Apelin signaling pathway|ko04068 FoxO signaling pathway|ko04152 AMPK signaling pathway|ko04530 Tight junction|ko04910 Insulin signaling pathway|ko04922 Glucagon signaling pathway|ko04920 Adipocytokine signaling pathway|ko04921 Oxytocin signaling pathway|ko04211 Longevity regulating pathway|ko04213 Longevity regulating pathway - multiple species|ko04710 Circadian rhythm|ko04714 Thermogenes…	-	GO:0005515/protein binding	-	PF04739 PF16561	PTHR10343 PTHR10343:SF51		AT5G21170	5'-AMP-activated protein kinase beta-2 subunit protein
Potri.004G109699	125.255	42.5162	-1.55878	5.75918e-12	2.06516e-10	yes	Chr04:9777345-9779554	+	Chr04:9777345-9779554	+	09100 Metabolism	09101 Carbohydrate metabolism|09106 Metabolism of other amino acids|09110 Biosynthesis of other secondary metabolites	ko00500 Starch and sucrose metabolism|ko00460 Cyanoamino acid metabolism|ko00940 Phenylpropanoid biosynthesis	-	-	-	PF00232	PTHR10353 PTHR10353:SF37	EC:3.2.1.21	AT2G44490	Glycosyl hydrolase superfamily protein
Potri.013G108100	5.00624	56.805	3.50422	5.86066e-12	2.09907e-10	yes	Chr13:11688326-11689475	+	Chr13:11688326-11689475	+	-	-	-	-	-	-		PTHR10168 PTHR10168:SF94		AT1G22630
Potri.002G250900	51.6213	153.405	1.57131	6.29719e-12	2.25276e-10	yes	Chr02:24067415-24068662	-	Chr02:24067415-24068662	-	-	-	-	-	-	-
Potri.002G107800	34.7329	122.628	1.81992	6.41038e-12	2.29056e-10	yes	Chr02:8013948-8017704	+	Chr02:8013948-8017704	+	09100 Metabolism	09108 Metabolism of cofactors and vitamins	ko00860 Porphyrin and chlorophyll metabolism	GO:0005737/cytoplasm	GO:0016491/oxidoreductase activity|GO:0050661/NADP binding|GO:0004764/shikimate 3-dehydrogenase (NADP+) activity	GO:0055114/oxidation-reduction process|GO:0033014/tetrapyrrole biosynthetic process	PF00745 PF03807 PF05201	PTHR13812 PTHR13812:SF20	EC:1.2.1.70	AT1G09940	Glutamyl-tRNA reductase family protein
Potri.012G115800	83.0197	205.864	1.31017	6.57789e-12	2.34766e-10	yes	Chr12:13370109-13372652	-	Chr12:13370109-13372652	-	09190 Not Included in Pathway or Brite	09191 Unclassified: metabolism	ko99980 Enzymes with EC numbers	-	GO:0016671/oxidoreductase activity, acting on a sulfur group of donors, disulfide as acceptor	GO:0055114/oxidation-reduction process|GO:0019538/protein metabolic process	PF01625	PTHR10173 PTHR10173:SF23	EC:1.8.4.11	AT4G25130	peptide met sulfoxide reductase 4
Potri.013G035700	1.10993	45.1712	5.34687	6.70605e-12	2.39059e-10	yes	Chr13:2331010-2331891	-	Chr13:2331010-2331891	-	-	-	-	-	GO:0046872/metal ion binding|GO:0009055/electron transfer activity|GO:0005506/iron ion binding	-	PF00301	PTHR10909		AT1G54500	Rubredoxin-like superfamily protein
Potri.013G161000	31.6078	116.529	1.88233	6.71936e-12	2.39253e-10	yes	Chr13:15488620-15490849	-	Chr13:15488620-15490849	-	-	-	-	-	-	-	PF10674	PTHR35319 PTHR35319:SF2		AT5G58250	(1 of 1) PF10674 - Protein of unknown function (DUF2488) (Ycf54)
Potri.001G084400	1.93741	47.166	4.60554	7.30797e-12	2.59907e-10	yes	Chr01:6748221-6751958	-	Chr01:6748221-6751958	-	-	-	-	-	-	GO:0055085/transmembrane transport	PF03169|PF03169|PF03169|PF03169|PF03169	PTHR31645 PTHR31645:SF8|PTHR31645 PTHR31645:SF8|PTHR31645 PTHR31645:SF8|PTHR31645 PTHR31645:SF8|PTHR31645 PTHR31645:SF8		AT4G24120|AT4G24120|AT4G24120|AT4G24120|AT4G24120	YELLOW STRIPE like 1|YELLOW STRIPE like 1|YELLOW STRIPE like 1|YELLOW STRIPE like 1|YELLOW STRIPE like 1
Potri.006G094100	51.9732	0	-8.76197	7.37719e-12	2.62062e-10	yes	Chr06:7158972-7162694	+	Chr06:7158972-7162694	+	09190 Not Included in Pathway or Brite	09191 Unclassified: metabolism	ko99980 Enzymes with EC numbers	-	GO:0005507/copper ion binding|GO:0016491/oxidoreductase activity	GO:0055114/oxidation-reduction process	PF00394 PF07731 PF07732	PTHR11709 PTHR11709:SF9	EC:1.10.3.2	AT3G09220	laccase 7
Potri.001G167800	1.08383	44.5328	5.36066	9.31781e-12	3.30614e-10	yes	Chr01:14315115-14317433	+	Chr01:14315115-14317433	+	-	-	-	-	GO:0020037/heme binding|GO:0009055/electron transfer activity|GO:0016705/oxidoreductase activity, acting on paired donors, with incorporation or reduction of molecular oxygen	GO:0055114/oxidation-reduction process	PF00067	PTHR24298 PTHR24298:SF51	EC:1.14.13.21
Potri.008G165400	1.99742	46.8397	4.55152	9.78649e-12	3.46435e-10	yes	Chr08:11398200-11402430	+	Chr08:11398200-11402430	+	-	-	-	-	GO:0016706/oxidoreductase activity, acting on paired donors, with incorporation or reduction of molecular oxygen, 2-oxoglutarate as one donor, and incorporation of one atom each of oxygen into both donors|GO:0016491/oxidoreductase activity	GO:0055114/oxidation-reduction process	PF03171 PF14226	PTHR10209 PTHR10209:SF120	EC:1.14.11.20
Potri.001G338100	9.58103	68.1846	2.83119	1.00521e-11	3.55424e-10	yes	Chr01:34697674-34698464	-	Chr01:34697674-34698464	-	-	-	-	-	-	-		PTHR34278 PTHR34278:SF1
Potri.004G033600	230.798	115.281	-1.00148	1.00906e-11	3.56371e-10	yes	Chr04:2591440-2595068	-	Chr04:2591440-2595068	-	-	-	-	GO:0016021/integral component of membrane	GO:0022857/transmembrane transporter activity	GO:0055085/transmembrane transport	PF07690	PTHR23500 PTHR23500:SF55		AT1G11260	sugar transporter 1
Potri.019G088600	67.4248	11.6151	-2.53728	1.03581e-11	3.65394e-10	yes	Chr19:12730728-12733736	+	Chr19:12730728-12733736	+	09190 Not Included in Pathway or Brite	09191 Unclassified: metabolism	ko99980 Enzymes with EC numbers	-	GO:0005507/copper ion binding|GO:0016491/oxidoreductase activity	GO:0055114/oxidation-reduction process	PF00394 PF07731 PF07732	PTHR11709 PTHR11709:SF118	EC:1.10.3.2
Potri.004G216500	0	44.3254	6.47006	1.11056e-11	3.91309e-10	yes	Chr04:22219033-22220419	-	Chr04:22219033-22220419	-	09180 Brite Hierarchies	09183 Protein families: signaling and cellular processes	ko02000 Transporters	GO:0016020/membrane	GO:0005215/transporter activity	GO:0006810/transport	PF00230	PTHR19139 PTHR19139:SF52
Potri.006G067600	5.24357	56.3492	3.42577	1.12362e-11	3.95453e-10	yes	Chr06:4948262-4950046	+	Chr06:4948262-4950046	+	-	-	-	-	-	-		PTHR35742		AT4G02530	chloroplast thylakoid lumen protein
Potri.002G132200	10.1464	69.367	2.77328	1.14085e-11	4.01052e-10	yes	Chr02:9977835-9980030	-	Chr02:9977835-9980030	-	09120 Genetic Information Processing|09180 Brite Hierarchies	09122 Translation|09182 Protein families: genetic information processing	ko03010 Ribosome|ko03011 Ribosome	GO:0005840/ribosome|GO:0005622/intracellular	GO:0003735/structural constituent of ribosome	GO:0006412/translation	PF00380	PTHR21569 PTHR21569:SF2		AT1G74970	ribosomal protein S9
Potri.003G119200	10.0255	68.9996	2.78291	1.18163e-11	4.14429e-10	yes	Chr03:14068535-14071870	+	Chr03:14068535-14071870	+	-	-	-	-	-	-		PTHR31032 PTHR31032:SF1|PTHR31032 PTHR31032:SF1|PTHR31032 PTHR31032:SF1|PTHR31032 PTHR31032:SF1|PTHR31032 PTHR31032:SF1		AT4G11960|AT4G11960|AT4G11960|AT4G11960|AT4G11960	PGR5-like B|PGR5-like B|PGR5-like B|PGR5-like B|PGR5-like B
Potri.018G066900	0	53.0162	8.77239	1.19292e-11	4.17908e-10	yes	Chr18:8050847-8052897	+	Chr18:8050847-8052897	+	-	-	-	GO:0005622/intracellular	GO:0008270/zinc ion binding	-	PF00641	PTHR23111 PTHR23111:SF41		AT2G26695	Ran BP2/NZF zinc finger-like superfamily protein
Potri.013G045700	66.4139	11.3203	-2.55257	1.27327e-11	4.45544e-10	yes	Chr13:3210511-3211497	-	Chr13:3210511-3211497	-	-	-	-	-	-	-
Potri.010G005000	19.8124	91.0411	2.20011	1.41084e-11	4.93113e-10	yes	Chr10:476596-477937	+	Chr10:476596-477937	+	09120 Genetic Information Processing|09180 Brite Hierarchies	09122 Translation|09182 Protein families: genetic information processing	ko03010 Ribosome|ko03011 Ribosome	GO:0005840/ribosome|GO:0005622/intracellular	GO:0003735/structural constituent of ribosome	GO:0006412/translation	PF00861	PTHR12899		AT1G48350	Ribosomal L18p/L5e family protein
Potri.008G195100	0	71.4309	10.9411	1.43069e-11	4.99476e-10	yes	Chr08:13767744-13773271	+	Chr08:13767744-13773271	+	09100 Metabolism|09140 Cellular Processes	09101 Carbohydrate metabolism|09145 Cellular community - prokaryotes	ko00500 Starch and sucrose metabolism|ko00520 Amino sugar and nucleotide sugar metabolism|ko02026 Biofilm formation - Escherichia coli	-	GO:0016779/nucleotidyltransferase activity	GO:0009058/biosynthetic process	PF00483	PTHR22572 PTHR22572:SF119	EC:2.7.7.27	AT5G19220	ADP glucose pyrophosphorylase large subunit 1
Potri.011G023900	224.879	111.848	-1.00761	1.49804e-11	5.2239e-10	yes	Chr11:1766624-1769759	-	Chr11:1766624-1769759	-	09100 Metabolism	09108 Metabolism of cofactors and vitamins	ko00860 Porphyrin and chlorophyll metabolism	-	-	GO:0055114/oxidation-reduction process|GO:0006779/porphyrin-containing compound biosynthetic process	PF01218	PTHR10755 PTHR10755:SF7	EC:1.3.3.3	AT1G03475	Coproporphyrinogen III oxidase
Potri.012G020700	4.21793	52.831	3.64678	1.52075e-11	5.29701e-10	yes	Chr12:2184337-2185945	+	Chr12:2184337-2185945	+	-	-	-	-	-	-	PF00581	PTHR12231 PTHR12231:SF112		AT4G27700	Rhodanese/Cell cycle control phosphatase superfamily protein
Potri.005G218300	8.04168	63.3891	2.97867	1.58377e-11	5.5102e-10	yes	Chr05:22102762-22106236	+	Chr05:22102762-22106236	+	09130 Environmental Information Processing	09132 Signal transduction	ko04075 Plant hormone signal transduction	GO:0005634/nucleus	-	GO:0006355/regulation of transcription, DNA-templated	PF02309	PTHR31734 PTHR31734:SF37		AT3G04730	indoleacetic acid-induced protein 16
Potri.010G166800	1.29324	44.0394	5.08973	1.58638e-11	5.51298e-10	yes	Chr10:16989368-16990398	+	Chr10:16989368-16990398	+	09100 Metabolism|09180 Brite Hierarchies	09102 Energy metabolism|09181 Protein families: metabolism	ko00195 Photosynthesis|ko00194 Photosynthesis proteins	GO:0019898/extrinsic component of membrane|GO:0009654/photosystem II oxygen evolving complex	GO:0005509/calcium ion binding	GO:0015979/photosynthesis	PF05757|PF05757	PTHR33399 PTHR33399:SF5|PTHR33399 PTHR33399:SF5		AT1G14150|AT1G14150	PsbQ-like 2|PsbQ-like 2
Potri.006G100500	32.0899	115.4	1.84645	1.63349e-11	5.67023e-10	yes	Chr06:7692328-7696517	+	Chr06:7692328-7696517	+	09100 Metabolism	09108 Metabolism of cofactors and vitamins	ko00750 Vitamin B6 metabolism	-	-	GO:0009228/thiamine biosynthetic process	PF01680|PF01680	PTHR31829|PTHR31829	EC:4.3.3.6|EC:4.3.3.6	AT5G01410|AT5G01410	Aldolase-type TIM barrel family protein|Aldolase-type TIM barrel family protein
Potri.001G244800	13.2012	75.9171	2.52375	1.74089e-11	6.02927e-10	yes	Chr01:26194783-26197821	+	Chr01:26194783-26197821	+	-	-	-	-	-	-	PF05368	PTHR14194 PTHR14194:SF38		AT3G46780	plastid transcriptionally active 16
Potri.014G148500	5.95662	57.4986	3.27096	1.83485e-11	6.34746e-10	yes	Chr14:10183753-10189101	-	Chr14:10183753-10189101	-	-	-	-	-	GO:0003723/RNA binding	-	PF00575	PTHR23270 PTHR23270:SF9		AT3G23700	Nucleic acid-binding proteins superfamily
Potri.018G126000	0	46.8526	7.73895	1.8445e-11	6.37359e-10	yes	Chr18:13728068-13730352	+	Chr18:13728068-13730352	+	-	-	-	-	-	-	PF14547|PF14547|PF14547	PTHR31731|PTHR31731|PTHR31731		AT2G10940|AT2G10940|AT2G10940	Bifunctional inhibitor/lipid-transfer protein/seed storage 2S albumin superfamily protein|Bifunctional inhibitor/lipid-transfer protein/seed storage 2S albumin superfamily protein|Bifunctional inhibitor/lipid-transfer protein/seed storage 2S albumin superfamily protein
Potri.013G054200	44.4392	2.61994	-4.08423	1.88825e-11	6.51734e-10	yes	Chr13:3941789-3943855	+	Chr13:3941789-3943855	+	-	-	-	-	GO:0003677/DNA binding	GO:0006355/regulation of transcription, DNA-templated	PF02365	PTHR31744 PTHR31744:SF10		AT3G04060	NAC domain containing protein 46
Potri.003G132700	55.3954	6.82765	-3.02031	1.89155e-11	6.52134e-10	yes	Chr03:15074589-15076285	+	Chr03:15074589-15076285	+	09130 Environmental Information Processing|09150 Organismal Systems|09180 Brite Hierarchies	09132 Signal transduction|09159 Environmental adaptation|09182 Protein families: genetic information processing	ko04016 MAPK signaling pathway - plant|ko04626 Plant-pathogen interaction|ko03000 Transcription factors	-	GO:0043565/sequence-specific DNA binding|GO:0003700/DNA binding transcription factor activity	GO:0006355/regulation of transcription, DNA-templated	PF03106	PTHR32096 PTHR32096:SF30
Potri.010G042000	0	42.9066	6.20605	2.00876e-11	6.91759e-10	yes	Chr10:7324240-7326803	-	Chr10:7324240-7326803	-	09100 Metabolism	09101 Carbohydrate metabolism	ko00052 Galactose metabolism	-	GO:0016757/transferase activity, transferring glycosyl groups	-	PF01501	PTHR11183 PTHR11183:SF53	EC:2.4.1.123	AT1G60470	galactinol synthase 4
Potri.002G193000	70.9669	13.885	-2.35362	2.09849e-11	7.21843e-10	yes	Chr02:15572702-15575955	-	Chr02:15572702-15575955	-	-	-	-	-	GO:0043565/sequence-specific DNA binding|GO:0003700/DNA binding transcription factor activity	GO:0006355/regulation of transcription, DNA-templated	PF03106|PF03106	PTHR31221 PTHR31221:SF23|PTHR31221 PTHR31221:SF23		AT2G47260|AT2G47260	WRKY DNA-binding protein 23|WRKY DNA-binding protein 23
Potri.008G041600	57.908	7.96549	-2.86193	2.14301e-11	7.36322e-10	yes	Chr08:2339387-2341292	-	Chr08:2339387-2341292	-	-	-	-	GO:0016021/integral component of membrane	-	-	PF00335	PTHR32191 PTHR32191:SF1		AT3G12090	tetraspanin6
Potri.002G120400	24.3764	99.5844	2.03043	2.1758e-11	7.46748e-10	yes	Chr02:9137105-9139867	+	Chr02:9137105-9139867	+	-	-	-	-	GO:0042802/identical protein binding|GO:0004252/serine-type endopeptidase activity	GO:0043086/negative regulation of catalytic activity|GO:0006508/proteolysis	PF00082 PF02225 PF05922|PF00082 PF02225 PF05922	PTHR10795 PTHR10795:SF388|PTHR10795 PTHR10795:SF388	EC:3.4.14.10|EC:3.4.14.10
Potri.006G088200	49.1303	145.788	1.56919	2.1889e-11	7.50395e-10	yes	Chr06:6645850-6646816	-	Chr06:6645850-6646816	-	-	-	-	-	-	-	PF00504	PTHR14154 PTHR14154:SF11		AT5G02120	one helix protein
Potri.001G420900	15.7951	81.3312	2.36433	2.24559e-11	7.68963e-10	yes	Chr01:44936370-44938323	-	Chr01:44936370-44938323	-	-	-	-	-	-	-	PF13857	PTHR24151 PTHR24151:SF1		AT1G50900	Ankyrin repeat family protein
Potri.017G059100	19.6959	89.8133	2.18904	2.25084e-11	7.69894e-10	yes	Chr17:4768136-4770239	-	Chr17:4768136-4770239	-	09100 Metabolism	09101 Carbohydrate metabolism	ko00520 Amino sugar and nucleotide sugar metabolism	-	GO:0003854/3-beta-hydroxy-delta5-steroid dehydrogenase activity|GO:0016491/oxidoreductase activity|GO:0050662/coenzyme binding|GO:0008831/dTDP-4-dehydrorhamnose reductase activity	GO:0055114/oxidation-reduction process|GO:0044237/cellular metabolic process|GO:0006694/steroid biosynthetic process|GO:0009058/biosynthetic process|GO:0045226/extracellular polysaccharide biosynthetic process	PF01073	PTHR10366 PTHR10366:SF436	EC:5.1.3.6	AT3G23820	UDP-D-glucuronate 4-epimerase 6
Potri.008G029700	74.9849	15.958	-2.23232	2.3479e-11	8.02191e-10	yes	Chr08:1600921-1602928	+	Chr08:1600921-1602928	+	-	-	-	-	GO:0016706/oxidoreductase activity, acting on paired donors, with incorporation or reduction of molecular oxygen, 2-oxoglutarate as one donor, and incorporation of one atom each of oxygen into both donors|GO:0016491/oxidoreductase activity	GO:0055114/oxidation-reduction process	PF03171 PF14226	PTHR10209 PTHR10209:SF224	EC:1.14.11.9	AT2G36690	2-oxoglutarate (2OG) and Fe(II)-dependent oxygenase superfamily protein
Potri.001G355100	93.687	25.8515	-1.8576	2.35639e-11	8.04187e-10	yes	Chr01:36880605-36888490	-	Chr01:36880605-36888490	-	-	-	-	-	GO:0016706/oxidoreductase activity, acting on paired donors, with incorporation or reduction of molecular oxygen, 2-oxoglutarate as one donor, and incorporation of one atom each of oxygen into both donors|GO:0016491/oxidoreductase activity	GO:0055114/oxidation-reduction process	PF03171 PF14226	PTHR10209 PTHR10209:SF168	EC:1.14.11.32
Potri.016G037100	70.083	13.5793	-2.36765	2.4027e-11	8.19074e-10	yes	Chr16:2252336-2252542	-	Chr16:2252336-2252542	-	-	-	-	-	-	-		PTHR38928
Potri.002G253400	0	80.4367	11.7842	2.47753e-11	8.43636e-10	yes	Chr02:24224773-24227587	-	Chr02:24224773-24227587	-	-	-	-	-	GO:0016788/hydrolase activity, acting on ester bonds	GO:0006629/lipid metabolic process	PF00657	PTHR22835 PTHR22835:SF160	EC:3.1.1.3	AT4G28780	GDSL-like Lipase/Acylhydrolase superfamily protein
Potri.014G172800	5.72148	56.2749	3.29803	2.52644e-11	8.59328e-10	yes	Chr14:12827869-12829492	-	Chr14:12827869-12829492	-	-	-	-	-	-	-	PF11210|PF11210	PTHR36341 PTHR36341:SF2|PTHR36341 PTHR36341:SF2		AT2G04039|AT2G04039	(1 of 1) PF11210 - Protein of unknown function (DUF2996)|(1 of 1) PF11210 - Protein of unknown function (DUF2996)
Potri.018G101700	198.525	93.9955	-1.07865	2.56212e-11	8.7049e-10	yes	Chr18:12150472-12151558	+	Chr18:12150472-12151558	+	09100 Metabolism	09101 Carbohydrate metabolism	ko00051 Fructose and mannose metabolism|ko00520 Amino sugar and nucleotide sugar metabolism	-	GO:0050662/coenzyme binding|GO:0003824/catalytic activity|GO:0008831/dTDP-4-dehydrorhamnose reductase activity	GO:0044237/cellular metabolic process|GO:0045226/extracellular polysaccharide biosynthetic process	PF16363	PTHR10366 PTHR10366:SF246	EC:1.1.1.271	AT1G73250	GDP-4-keto-6-deoxymannose-3,5-epimerase-4-reductase 1
Potri.008G048700	44.77	2.9822	-3.90808	2.83869e-11	9.6338e-10	yes	Chr08:2849708-2851746	-	Chr08:2849708-2851746	-	09150 Organismal Systems|09180 Brite Hierarchies	09152 Endocrine system|09182 Protein families: genetic information processing	ko04910 Insulin signaling pathway|ko04131 Membrane trafficking|ko03036 Chromosome and associated proteins	GO:0000145/exocyst	-	GO:0006887/exocytosis	PF03081	PTHR12542 PTHR12542:SF26		AT3G55150	exocyst subunit exo70 family protein H1
Potri.006G276400	15.0844	79.0868	2.39038	3.10527e-11	1.05268e-09	yes	Chr06:26770250-26772322	+	Chr06:26770250-26772322	+	-	-	-	GO:0009507/chloroplast	GO:0005198/structural molecule activity	-	PF04755	PTHR31906 PTHR31906:SF12		AT5G19940	Plastid-lipid associated protein PAP / fibrillin family protein
Potri.004G110691	112.094	36.8834	-1.60366	3.14418e-11	1.06468e-09	yes	Chr04:10029389-10032555	+	Chr04:10029389-10032555	+	09100 Metabolism	09101 Carbohydrate metabolism|09106 Metabolism of other amino acids|09110 Biosynthesis of other secondary metabolites	ko00500 Starch and sucrose metabolism|ko00460 Cyanoamino acid metabolism|ko00940 Phenylpropanoid biosynthesis	-	-	-	PF00232	PTHR10353 PTHR10353:SF37	EC:3.2.1.21	AT2G44490	Glycosyl hydrolase superfamily protein
Potri.017G032800	39.6373	127.7	1.68783	3.42568e-11	1.15871e-09	yes	Chr17:2274099-2277632	+	Chr17:2274099-2277632	+	-	-	-	-	-	-	PF07939|PF07939	PTHR31865 PTHR31865:SF0|PTHR31865 PTHR31865:SF0		AT2G31560|AT2G31560	Protein of unknown function (DUF1685)|Protein of unknown function (DUF1685)
Potri.007G027400	1.83382	44.1752	4.59032	3.45295e-11	1.16664e-09	yes	Chr07:2105082-2106119	-	Chr07:2105082-2106119	-	-	-	-	-	-	-		PTHR37231		AT3G50685
Potri.018G089500	0	42.0821	6.39514	3.46977e-11	1.17102e-09	yes	Chr18:10879562-10881616	-	Chr18:10879562-10881616	-	-	-	-	-	GO:0016788/hydrolase activity, acting on ester bonds	GO:0006629/lipid metabolic process	PF00657	PTHR22835 PTHR22835:SF157	EC:3.1.1.3
Potri.001G262400	24.4372	98.6262	2.01289	3.55682e-11	1.19906e-09	yes	Chr01:27835819-27840892	+	Chr01:27835819-27840892	+	09120 Genetic Information Processing|09180 Brite Hierarchies	09122 Translation|09182 Protein families: genetic information processing	ko03010 Ribosome|ko03011 Ribosome	GO:0015934/large ribosomal subunit	GO:0003723/RNA binding|GO:0003735/structural constituent of ribosome	GO:0006412/translation	PF00687	PTHR23105 PTHR23105:SF5		AT3G63490	Ribosomal protein L1p/L10e family
Potri.001G092600	20.2391	89.9918	2.15265	3.56291e-11	1.19979e-09	yes	Chr01:7343618-7344721	-	Chr01:7343618-7344721	-	-	-	-	-	-	-
Potri.015G120900	39.2419	0	-5.8474	3.73774e-11	1.25727e-09	yes	Chr15:13487626-13490362	-	Chr15:13487626-13490362	-	09100 Metabolism	09103 Lipid metabolism|09109 Metabolism of terpenoids and polyketides	ko00100 Steroid biosynthesis|ko00909 Sesquiterpenoid and triterpenoid biosynthesis	GO:0016021/integral component of membrane	GO:0004506/squalene monooxygenase activity|GO:0050660/flavin adenine dinucleotide binding	GO:0055114/oxidation-reduction process|GO:0008033/tRNA processing	PF01494	PTHR10835 PTHR10835:SF1	EC:1.14.13.132 EC:1.14.99.7
Potri.017G028450	10.4705	67.847	2.69596	3.90648e-11	1.31258e-09	yes	Chr17:1926225-1928407	+	Chr17:1926225-1928407	+	-	-	-	-	-	-	PF00067	PTHR24298 PTHR24298:SF155
Potri.002G122800	66.8104	12.4719	-2.42139	4.0436e-11	1.35715e-09	yes	Chr02:9293862-9294593	+	Chr02:9293862-9294593	+	-	-	-	-	-	-				AT5G67265|AT5G67265
Potri.006G059200	6.511	57.5907	3.14488	4.09729e-11	1.37365e-09	yes	Chr06:4184582-4187447	-	Chr06:4184582-4187447	-	-	-	-	-	-	-	PF00581	PTHR12231 PTHR12231:SF111		AT2G42220	Rhodanese/Cell cycle control phosphatase superfamily protein
Potri.002G073400	81.6153	19.9141	-2.03505	4.10687e-11	1.37535e-09	yes	Chr02:5152274-5157064	-	Chr02:5152274-5157064	-	-	-	-	-	-	-	PF03514|PF03514	PTHR31636 PTHR31636:SF10|PTHR31636 PTHR31636:SF10		AT1G21450|AT1G21450	SCARECROW-like 1|SCARECROW-like 1
Potri.018G013875	57.0866	8.1125	-2.81493	4.23101e-11	1.41536e-09	yes	Chr18:928351-929988	-	Chr18:928351-929988	-	-	-	-	-	-	-
Potri.004G161200	111.509	36.9398	-1.59392	4.24612e-11	1.41886e-09	yes	Chr04:18098623-18104318	+	Chr04:18098623-18104318	+	09100 Metabolism|09180 Brite Hierarchies	09103 Lipid metabolism|09109 Metabolism of terpenoids and polyketides|09181 Protein families: metabolism	ko00100 Steroid biosynthesis|ko00909 Sesquiterpenoid and triterpenoid biosynthesis|ko01006 Prenyltransferases	-	GO:0016740/transferase activity	GO:0009058/biosynthetic process	PF00494	PTHR11626 PTHR11626:SF2	EC:2.5.1.21	AT4G34650	squalene synthase 2
Potri.001G422301	56.0181	7.70143	-2.86269	4.50042e-11	1.50218e-09	yes	Chr01:45025710-45026955	+	Chr01:45025710-45026955	+	-	-	-	-	-	-
Potri.018G091600	52.6598	6.31381	-3.06012	4.56107e-11	1.52076e-09	yes	Chr18:11220267-11223993	-	Chr18:11220267-11223993	-	09180 Brite Hierarchies	09182 Protein families: genetic information processing	ko03000 Transcription factors	-	GO:0003700/DNA binding transcription factor activity	GO:0006355/regulation of transcription, DNA-templated	PF00847|PF00847	PTHR32467 PTHR32467:SF23|PTHR32467 PTHR32467:SF23		AT5G57390|AT5G57390	AINTEGUMENTA-like 5|AINTEGUMENTA-like 5
Potri.018G089100	0	41.3888	6.37117	4.94454e-11	1.64681e-09	yes	Chr18:10796364-10807866	-	Chr18:10796364-10807866	-	-	-	-	-	GO:0016788/hydrolase activity, acting on ester bonds	GO:0006629/lipid metabolic process		PTHR22835 PTHR22835:SF157	EC:3.1.1.3
Potri.011G081001	0	53.905	9.41023	4.97475e-11	1.65506e-09	yes	Chr11:8764611-8765144	+	Chr11:8764611-8765144	+	-	-	-	-	-	-		PTHR35101 PTHR35101:SF1		AT1G30260
Potri.019G017302	45.7709	3.75506	-3.60752	5.56716e-11	1.85012e-09	yes	Chr19:2803475-2803789	-	Chr19:2803475-2803789	-	-	-	-	-	-	-
Potri.003G214500	38.8674	0	-6.28049	5.66428e-11	1.88034e-09	yes	Chr03:21093081-21095068	-	Chr03:21093081-21095068	-	09100 Metabolism	09110 Biosynthesis of other secondary metabolites	ko00940 Phenylpropanoid biosynthesis	-	GO:0020037/heme binding|GO:0004601/peroxidase activity	GO:0055114/oxidation-reduction process|GO:0006979/response to oxidative stress	PF00141	PTHR31388 PTHR31388:SF6	EC:1.11.1.7	AT5G19890	Peroxidase superfamily protein
Potri.011G162940	39.9322	1.61206	-4.63057	5.81031e-11	1.92672e-09	yes	Chr11:18771583-18773463	+	Chr11:18771583-18773463	+	-	-	-	-	-	-	PF01565 PF08031	PTHR32448 PTHR32448:SF30	EC:1.3.3.8	AT5G44410	FAD-binding Berberine family protein
Potri.019G130566	74.4152	185.464	1.31747	5.83412e-11	1.93251e-09	yes	Chr19:15308401-15309347	+	Chr19:15308401-15309347	+	09100 Metabolism|09150 Organismal Systems|09160 Human Diseases|09180 Brite Hierarchies	09106 Metabolism of other amino acids|09111 Xenobiotics biodegradation and metabolism|09149 Aging|09161 Cancer: overview|09162 Cancer: specific types|09166 Cardiovascular disease|09176 Drug resistance: antineoplastic|09183 Protein families: signaling and cellular processes	ko00480 Glutathione metabolism|ko00980 Metabolism of xenobiotics by cytochrome P450|ko00982 Drug metabolism - cytochrome P450|ko00983 Drug metabolism - other enzymes|ko04212 Longevity regulating pathway - worm|ko05200 Pathways in cancer|ko05204 Chemical carcinogenesis|ko05225 Hepatocellular carcinoma|ko05418 Fluid shear stress and atherosclerosis|ko01524 Platinum drug resistance|ko02000 Transport…	-	-	-	PF02798	PTHR11260 PTHR11260:SF297	EC:2.5.1.18
Potri.004G173800	100.461	30.8485	-1.70336	6.04245e-11	1.99933e-09	yes	Chr04:18894825-18896151	+	Chr04:18894825-18896151	+	09140 Cellular Processes|09150 Organismal Systems|09160 Human Diseases|09180 Brite Hierarchies	09142 Cell motility|09151 Immune system|09158 Development and regeneration|09171 Infectious disease: bacterial|09172 Infectious disease: viral|09182 Protein families: genetic information processing|09183 Protein families: signaling and cellular processes	ko04810 Regulation of actin cytoskeleton|ko04666 Fc gamma R-mediated phagocytosis|ko04360 Axon guidance|ko05133 Pertussis|ko05170 Human immunodeficiency virus 1 infection|ko04131 Membrane trafficking|ko04812 Cytoskeleton proteins|ko04147 Exosome	GO:0005622/intracellular	GO:0003779/actin binding	-	PF00241	PTHR11913 PTHR11913:SF16		AT2G16700	actin depolymerizing factor 5
Potri.004G168600	0	103.587	13.3611	6.14044e-11	2.02955e-09	yes	Chr04:18632921-18635598	+	Chr04:18632921-18635598	+	-	-	-	-	-	-	PF01190	PTHR23201 PTHR23201:SF16		AT4G38770	proline-rich protein 4
Potri.017G002950	78.3339	18.668	-2.06907	6.52269e-11	2.15355e-09	yes	Chr17:165751-168243	-	Chr17:165751-168243	-	-	-	-	-	-	-	PF00107 PF16884	PTHR11695 PTHR11695:SF537	EC:1.1.1.54 EC:1.3.1.102 EC:1.3.1.74
Potri.013G042700	163.403	71.2932	-1.1966	6.60855e-11	2.17953e-09	yes	Chr13:2944266-2945296	+	Chr13:2944266-2945296	+	09180 Brite Hierarchies	09182 Protein families: genetic information processing	ko03036 Chromosome and associated proteins	GO:0000786/nucleosome|GO:0005634/nucleus	GO:0003677/DNA binding	GO:0006334/nucleosome assembly	PF00538	PTHR11467 PTHR11467:SF48
Potri.013G128700	9.33602	64.0535	2.7784	6.62174e-11	2.18152e-09	yes	Chr13:13583685-13584574	+	Chr13:13583685-13584574	+	-	-	-	-	-	-		PTHR37182		AT1G21500
Potri.001G365600	12.3507	71.2698	2.5287	6.81211e-11	2.2418e-09	yes	Chr01:38217750-38220491	-	Chr01:38217750-38220491	-	09120 Genetic Information Processing|09180 Brite Hierarchies	09122 Translation|09182 Protein families: genetic information processing	ko03010 Ribosome|ko03011 Ribosome	GO:0005840/ribosome|GO:0005622/intracellular	GO:0003735/structural constituent of ribosome	GO:0006412/translation	PF00338|PF00338	PTHR11700 PTHR11700:SF9|PTHR11700 PTHR11700:SF9		AT3G13120|AT3G13120	Ribosomal protein S10p/S20e family protein|Ribosomal protein S10p/S20e family protein
Potri.014G019300	37.2061	121.208	1.70387	7.88236e-11	2.59121e-09	yes	Chr14:1174080-1175742	-	Chr14:1174080-1175742	-	-	-	-	-	GO:0050662/coenzyme binding|GO:0003824/catalytic activity	GO:0044237/cellular metabolic process	PF01370	PTHR32487 PTHR32487:SF0	EC:1.3.1.3 EC:1.3.99.6	AT4G24220	NAD(P)-binding Rossmann-fold superfamily protein
Potri.005G161900	4.85728	51.7856	3.41433	8.05723e-11	2.64583e-09	yes	Chr05:15903578-15907534	+	Chr05:15903578-15907534	+	09100 Metabolism	09101 Carbohydrate metabolism|09106 Metabolism of other amino acids	ko00053 Ascorbate and aldarate metabolism|ko00480 Glutathione metabolism	-	GO:0020037/heme binding|GO:0004601/peroxidase activity	GO:0055114/oxidation-reduction process|GO:0006979/response to oxidative stress	PF00141|PF00141	PTHR31356 PTHR31356:SF6|PTHR31356 PTHR31356:SF6	EC:1.11.1.11|EC:1.11.1.11	AT4G09010|AT4G09010	ascorbate peroxidase 4|ascorbate peroxidase 4
Potri.012G086200	10.4308	66.361	2.66948	8.12374e-11	2.6648e-09	yes	Chr12:11166008-11166250	+	Chr12:11166008-11166250	+	-	-	-	-	-	-		PTHR38224
Potri.006G265400	35.3905	117.761	1.73443	8.2357e-11	2.69861e-09	yes	Chr06:26095867-26098609	+	Chr06:26095867-26098609	+	09100 Metabolism|09150 Organismal Systems|09160 Human Diseases	09103 Lipid metabolism|09106 Metabolism of other amino acids|09152 Endocrine system|09164 Neurodegenerative disease	ko00590 Arachidonic acid metabolism|ko00480 Glutathione metabolism|ko04918 Thyroid hormone synthesis|ko05014 Amyotrophic lateral sclerosis (ALS)|ko05016 Huntington disease	-	GO:0016209/antioxidant activity|GO:0016491/oxidoreductase activity|GO:0004602/glutathione peroxidase activity	GO:0055114/oxidation-reduction process|GO:0006979/response to oxidative stress	PF00578	PTHR11592 PTHR11592:SF11	EC:1.11.1.12	AT4G31870	glutathione peroxidase 7
Potri.016G099200	41.873	2.55391	-4.03524	8.24883e-11	2.7e-09	yes	Chr16:10013528-10015567	+	Chr16:10013528-10015567	+	09180 Brite Hierarchies	09182 Protein families: genetic information processing	ko03000 Transcription factors	-	GO:0003677/DNA binding	-	PF00249	PTHR10641 PTHR10641:SF561		AT2G36890	Duplicated homeodomain-like superfamily protein
Potri.001G082100	51.3074	6.17418	-3.05485	8.32876e-11	2.72323e-09	yes	Chr01:6500550-6508457	+	Chr01:6500550-6508457	+	09120 Genetic Information Processing|09180 Brite Hierarchies	09121 Transcription|09182 Protein families: genetic information processing	ko03040 Spliceosome|ko03041 Spliceosome|ko04121 Ubiquitin system	-	-	-	PF03343	PTHR14152		AT5G16780	SART-1 family
Potri.008G132850	47.9168	4.83986	-3.30749	8.54079e-11	2.78956e-09	yes	Chr08:8794090-8796071	+	Chr08:8794090-8796071	+	-	-	-	-	-	-	PF04749	PTHR15907 PTHR15907:SF47
Potri.019G100800	13.622	73.7148	2.43602	8.73353e-11	2.84946e-09	yes	Chr19:13712510-13715392	+	Chr19:13712510-13715392	+	09120 Genetic Information Processing|09180 Brite Hierarchies	09123 Folding, sorting and degradation|09182 Protein families: genetic information processing	ko04141 Protein processing in endoplasmic reticulum|ko04121 Ubiquitin system	-	-	-	PF13923	PTHR12313 PTHR12313:SF5	EC:6.3.2.19	AT4G03510	RING membrane-anchor 1
Potri.009G043600	11.712	69.2759	2.56437	8.78474e-11	2.86309e-09	yes	Chr09:5029447-5029719	-	Chr09:5029447-5029719	-	-	-	-	-	-	-	PF11493	PTHR36370		AT3G47070	(1 of 1) PF11493 - Thylakoid soluble phosphoprotein TSP9 (TSP9)
Potri.007G074000	4.35233	50.0769	3.52429	9.30152e-11	3.02827e-09	yes	Chr07:9622511-9623702	-	Chr07:9622511-9623702	-	-	-	-	-	GO:0015035/protein disulfide oxidoreductase activity|GO:0009055/electron transfer activity	GO:0006662/glycerol ether metabolic process|GO:0045454/cell redox homeostasis	PF00578	PTHR10438 PTHR10438:SF270	EC:5.3.4.1	AT1G50320	thioredoxin X
Potri.017G028150	11.177	67.858	2.60198	9.49167e-11	3.08687e-09	yes	Chr17:1855883-1874257	+	Chr17:1855883-1874257	+	-	-	-	-	-	-	PF00067|PF00067	PTHR24298 PTHR24298:SF155|PTHR24298 PTHR24298:SF155
Potri.018G119400	37.5618	0	-5.31204	1.05164e-10	3.41648e-09	yes	Chr18:13483088-13495553	+	Chr18:13483088-13495553	+	-	-	-	-	-	-
Potri.010G093300	5.83204	53.966	3.20998	1.10269e-10	3.5785e-09	yes	Chr10:11776307-11777188	-	Chr10:11776307-11777188	-	-	-	-	-	-	-	PF03703	PTHR35688 PTHR35688:SF2		AT1G14345	NAD(P)-linked oxidoreductase superfamily protein
Potri.015G127700	37.3923	0	-5.95457	1.10343e-10	3.57709e-09	yes	Chr15:13916176-13918506	-	Chr15:13916176-13918506	-	09100 Metabolism|09130 Environmental Information Processing	09101 Carbohydrate metabolism|09132 Signal transduction	ko00040 Pentose and glucuronate interconversions|ko02020 Two-component system	GO:0005618/cell wall	GO:0004857/enzyme inhibitor activity|GO:0030599/pectinesterase activity	GO:0042545/cell wall modification	PF01095 PF04043	PTHR31707 PTHR31707:SF60	EC:3.1.1.11
Potri.002G042200	0	41.1026	7.05289	1.10946e-10	3.59279e-09	yes	Chr02:2772147-2773932	+	Chr02:2772147-2773932	+	09100 Metabolism|09180 Brite Hierarchies	09103 Lipid metabolism|09181 Protein families: metabolism	ko00073 Cutin, suberine and wax biosynthesis|ko00199 Cytochrome P450	-	GO:0020037/heme binding|GO:0009055/electron transfer activity|GO:0016705/oxidoreductase activity, acting on paired donors, with incorporation or reduction of molecular oxygen	GO:0055114/oxidation-reduction process	PF00067	PTHR24296 PTHR24296:SF11
Potri.001G209600	5.34199	52.5582	3.29847	1.13246e-10	3.66338e-09	yes	Chr01:21467266-21470436	+	Chr01:21467266-21470436	+	-	-	-	GO:0009507/chloroplast	GO:0005198/structural molecule activity	-	PF04755	PTHR31906 PTHR31906:SF14		AT3G26080	plastid-lipid associated protein PAP / fibrillin family protein
Potri.012G104600	52.1339	6.74877	-2.94953	1.16672e-10	3.7702e-09	yes	Chr12:12661547-12663091	-	Chr12:12661547-12663091	-	-	-	-	GO:0031012/extracellular matrix	GO:0008270/zinc ion binding|GO:0004222/metalloendopeptidase activity	GO:0008152/metabolic process|GO:0006508/proteolysis	PF00413 PF01471	PTHR10201 PTHR10201:SF140	EC:3.4.24.23	AT1G70170	matrix metalloproteinase
Potri.006G213000	4.30011	49.4725	3.52418	1.2058e-10	3.89236e-09	yes	Chr06:21942387-21948705	-	Chr06:21942387-21948705	-	-	-	-	-	GO:0015035/protein disulfide oxidoreductase activity|GO:0009055/electron transfer activity	GO:0045454/cell redox homeostasis	PF13417	PTHR11260 PTHR11260:SF166		AT5G03880	Thioredoxin family protein
Potri.010G042300	0	48.4468	8.8871	1.20597e-10	3.88876e-09	yes	Chr10:7405849-7406670	+	Chr10:7405849-7406670	+	-	-	-	-	-	-	PF09713	PTHR31871 PTHR31871:SF5	EC:3.4.17.23	AT1G10657	Plant protein 1589 of unknown function
Potri.009G065900	10.9276	66.8001	2.61187	1.20762e-10	3.88997e-09	yes	Chr09:6638902-6642144	+	Chr09:6638902-6642144	+	09120 Genetic Information Processing|09180 Brite Hierarchies	09122 Translation|09123 Folding, sorting and degradation|09182 Protein families: genetic information processing	ko03013 RNA transport|ko03015 mRNA surveillance pathway|ko03018 RNA degradation|ko03019 Messenger RNA biogenesis|ko03041 Spliceosome	-	GO:0003676/nucleic acid binding	-	PF00076	PTHR24012		AT3G52150	RNA-binding (RRM/RBD/RNP motifs) family protein
Potri.008G138100	104.55	34.1838	-1.61281	1.21996e-10	3.92557e-09	yes	Chr08:9282637-9288215	+	Chr08:9282637-9288215	+	-	-	-	-	-	-	PF07227 PF16312	PTHR21736 PTHR21736:SF15		AT1G14740	Protein of unknown function (DUF1423)
Potri.001G447500	40.6149	0	-7.59679	1.23921e-10	3.98328e-09	yes	Chr01:47272507-47274438	+	Chr01:47272507-47274438	+	09190 Not Included in Pathway or Brite	09191 Unclassified: metabolism	ko99980 Enzymes with EC numbers	-	GO:0016747/transferase activity, transferring acyl groups other than amino-acyl groups	-	PF02458	PTHR31642 PTHR31642:SF9	EC:2.3.1.196
Potri.010G053600	13.4226	72.5376	2.43407	1.25764e-10	4.03824e-09	yes	Chr10:8494947-8497393	-	Chr10:8494947-8497393	-	-	-	-	-	-	-		PTHR11804 PTHR11804:SF42|PTHR11804 PTHR11804:SF42		AT1G67700|AT1G67700	(1 of 1) PTHR11804//PTHR11804:SF42 - PROTEASE M3 THIMET OLIGOPEPTIDASE-RELATED|(1 of 1) PTHR11804//PTHR11804:SF42 - PROTEASE M3 THIMET OLIGOPEPTIDASE-RELATED
Potri.006G117500	58.5122	9.57848	-2.61087	1.2659e-10	4.06051e-09	yes	Chr06:9200004-9202290	-	Chr06:9200004-9202290	-	-	-	-	-	-	-	PF13837|PF13837	PTHR21654 PTHR21654:SF18|PTHR21654 PTHR21654:SF18		AT3G10040|AT3G10040	sequence-specific DNA binding transcription factors|sequence-specific DNA binding transcription factors
Potri.008G106700	138.489	55.7138	-1.31366	1.29258e-10	4.1417e-09	yes	Chr08:6734619-6735507	-	Chr08:6734619-6735507	-	-	-	-	-	GO:0043565/sequence-specific DNA binding|GO:0046983/protein dimerization activity|GO:0003700/DNA binding transcription factor activity	GO:0006355/regulation of transcription, DNA-templated	PF07716	PTHR22952 PTHR22952:SF154		AT5G49450	basic leucine-zipper 1
Potri.005G108850	0	39.3889	6.16197	1.29915e-10	4.15836e-09	yes	Chr05:7897862-7898819	-	Chr05:7897862-7898819	-	09100 Metabolism	09110 Biosynthesis of other secondary metabolites	ko00940 Phenylpropanoid biosynthesis	-	-	-
Potri.001G308600	66.059	13.1479	-2.32892	1.31714e-10	4.21153e-09	yes	Chr01:31909889-31917487	+	Chr01:31909889-31917487	+	-	-	-	-	GO:0005515/protein binding|GO:0005524/ATP binding|GO:0004672/protein kinase activity	GO:0006468/protein phosphorylation	PF00560 PF07714 PF11721	PTHR27006 PTHR27006:SF45	EC:2.7.11.1
Potri.001G052300	2.03936	42.4811	4.38063	1.32424e-10	4.22977e-09	yes	Chr01:3962323-3968154	+	Chr01:3962323-3968154	+	09100 Metabolism|09140 Cellular Processes	09101 Carbohydrate metabolism|09145 Cellular community - prokaryotes	ko00040 Pentose and glucuronate interconversions|ko02024 Quorum sensing	-	-	-	PF00544	PTHR31683 PTHR31683:SF20	EC:4.2.2.2	AT1G04680	Pectin lyase-like superfamily protein
Potri.008G208200	1.49601	40.8521	4.77122	1.33561e-10	4.26161e-09	yes	Chr08:15814751-15815425	+	Chr08:15814751-15815425	+	-	-	-	-	-	-	PF05498	PTHR33136 PTHR33136:SF13		AT3G16570	rapid alkalinization factor 23
Potri.015G010600	14.3988	74.5526	2.37231	1.38253e-10	4.4067e-09	yes	Chr15:690821-694291	-	Chr15:690821-694291	-	-	-	-	-	GO:0003824/catalytic activity	-	PF00481	PTHR13832 PTHR13832:SF218	EC:3.1.3.16	AT4G27800	thylakoid-associated phosphatase 38
Potri.007G122100	40.4362	2.33655	-4.1132	1.3893e-10	4.42364e-09	yes	Chr07:13946689-13948390	-	Chr07:13946689-13948390	-	09100 Metabolism	09110 Biosynthesis of other secondary metabolites	ko00940 Phenylpropanoid biosynthesis	-	GO:0020037/heme binding|GO:0004601/peroxidase activity	GO:0055114/oxidation-reduction process|GO:0006979/response to oxidative stress	PF00141	PTHR31235 PTHR31235:SF39	EC:1.11.1.7	AT1G05260	Peroxidase superfamily protein
Potri.007G121500	1.61373	41.1157	4.67122	1.39471e-10	4.43624e-09	yes	Chr07:13912891-13914891	+	Chr07:13912891-13914891	+	-	-	-	-	GO:0019901/protein kinase binding	GO:0000079/regulation of cyclin-dependent protein serine/threonine kinase activity	PF00134	PTHR15615 PTHR15615:SF20		AT3G21870	cyclin p2;1
Potri.019G057300	140.136	56.9626	-1.29874	1.41986e-10	4.5115e-09	yes	Chr19:9611093-9614150	-	Chr19:9611093-9614150	-	09130 Environmental Information Processing|09140 Cellular Processes|09150 Organismal Systems|09160 Human Diseases	09132 Signal transduction|09141 Transport and catabolism|09149 Aging|09164 Neurodegenerative disease	ko04013 MAPK signaling pathway - fly|ko04068 FoxO signaling pathway|ko04146 Peroxisome|ko04211 Longevity regulating pathway|ko04212 Longevity regulating pathway - worm|ko04213 Longevity regulating pathway - multiple species|ko05016 Huntington disease	-	GO:0004784/superoxide dismutase activity|GO:0046872/metal ion binding	GO:0055114/oxidation-reduction process|GO:0006801/superoxide metabolic process	PF00081 PF02777	PTHR11404 PTHR11404:SF6	EC:1.15.1.1	AT3G10920	manganese superoxide dismutase 1
Potri.001G105200	96.2843	29.5227	-1.70548	1.45104e-10	4.60578e-09	yes	Chr01:8465119-8468057	-	Chr01:8465119-8468057	-	09100 Metabolism|09150 Organismal Systems|09160 Human Diseases	09103 Lipid metabolism|09106 Metabolism of other amino acids|09152 Endocrine system|09164 Neurodegenerative disease	ko00590 Arachidonic acid metabolism|ko00480 Glutathione metabolism|ko04918 Thyroid hormone synthesis|ko05014 Amyotrophic lateral sclerosis (ALS)|ko05016 Huntington disease	-	GO:0016209/antioxidant activity|GO:0016491/oxidoreductase activity|GO:0004602/glutathione peroxidase activity	GO:0055114/oxidation-reduction process|GO:0006979/response to oxidative stress	PF00578	PTHR11592 PTHR11592:SF42	EC:1.11.1.12	AT4G11600	glutathione peroxidase 6
Potri.001G028200	43.4489	130.865	1.59069	1.46539e-10	4.64645e-09	yes	Chr01:2141029-2144085	+	Chr01:2141029-2144085	+	-	-	-	-	GO:0004190/aspartic-type endopeptidase activity	GO:0006508/proteolysis	PF00026	PTHR13683 PTHR13683:SF258	EC:3.4.23.12	AT5G07030	Eukaryotic aspartyl protease family protein
Potri.002G208400	6.35047	54.826	3.10992	1.50147e-10	4.75591e-09	yes	Chr02:18380001-18380735	-	Chr02:18380001-18380735	-	09180 Brite Hierarchies	09182 Protein families: genetic information processing	ko03110 Chaperones and folding catalysts	-	GO:0015035/protein disulfide oxidoreductase activity|GO:0009055/electron transfer activity	GO:0045454/cell redox homeostasis	PF00462	PTHR10168 PTHR10168:SF57	EC:1.8.1.9	AT3G62960	Thioredoxin superfamily protein
Potri.011G140700	0	40.2853	6.96804	1.52915e-10	4.83855e-09	yes	Chr11:17126189-17127997	-	Chr11:17126189-17127997	-	09100 Metabolism|09150 Organismal Systems|09160 Human Diseases|09180 Brite Hierarchies	09106 Metabolism of other amino acids|09111 Xenobiotics biodegradation and metabolism|09149 Aging|09161 Cancer: overview|09162 Cancer: specific types|09166 Cardiovascular disease|09176 Drug resistance: antineoplastic|09183 Protein families: signaling and cellular processes	ko00480 Glutathione metabolism|ko00980 Metabolism of xenobiotics by cytochrome P450|ko00982 Drug metabolism - cytochrome P450|ko00983 Drug metabolism - other enzymes|ko04212 Longevity regulating pathway - worm|ko05200 Pathways in cancer|ko05204 Chemical carcinogenesis|ko05225 Hepatocellular carcinoma|ko05418 Fluid shear stress and atherosclerosis|ko01524 Platinum drug resistance|ko02000 Transport…	-	GO:0005515/protein binding	-	PF02798 PF13410	PTHR11260 PTHR11260:SF302	EC:2.5.1.18	AT1G78340	glutathione S-transferase TAU 22
Potri.017G079500	36.7088	0	-5.72739	1.55996e-10	4.93091e-09	yes	Chr17:8848505-8851445	+	Chr17:8848505-8851445	+	-	-	-	-	GO:0043565/sequence-specific DNA binding|GO:0003700/DNA binding transcription factor activity	GO:0006355/regulation of transcription, DNA-templated	PF03106	PTHR31429 PTHR31429:SF5		AT5G15130	WRKY DNA-binding protein 72
Potri.011G064000	111.454	38.7451	-1.52436	1.58354e-10	5.00025e-09	yes	Chr11:5441393-5446998	+	Chr11:5441393-5446998	+	09100 Metabolism	09101 Carbohydrate metabolism	ko00010 Glycolysis / Gluconeogenesis	-	GO:0000287/magnesium ion binding|GO:0030976/thiamine pyrophosphate binding|GO:0003824/catalytic activity	-	PF00205 PF02775 PF02776	PTHR18968 PTHR18968:SF132	EC:4.1.1.1
Potri.014G068900	42.8484	0	-8.27429	1.60325e-10	5.05721e-09	yes	Chr14:4359401-4360136	+	Chr14:4359401-4360136	+	-	-	-	-	-	-	PF07279	PTHR33593 PTHR33593:SF2		AT3G60780	Protein of unknown function (DUF1442)
Potri.007G095200	4.47699	49.4712	3.46599	1.61902e-10	5.10169e-09	yes	Chr07:12032417-12035736	-	Chr07:12032417-12035736	-	-	-	-	-	GO:0003824/catalytic activity	GO:0008152/metabolic process	PF13419	PTHR18901 PTHR18901:SF30		AT4G39970	Haloacid dehalogenase-like hydrolase (HAD) superfamily protein
Potri.003G159700	0	40.3202	7.10203	1.77048e-10	5.57316e-09	yes	Chr03:16987240-16989689	-	Chr03:16987240-16989689	-	09190 Not Included in Pathway or Brite	09191 Unclassified: metabolism	ko99980 Enzymes with EC numbers	GO:0048046/apoplast|GO:0005618/cell wall	GO:0016762/xyloglucan:xyloglucosyl transferase activity|GO:0004553/hydrolase activity, hydrolyzing O-glycosyl compounds	GO:0006073/cellular glucan metabolic process|GO:0005975/carbohydrate metabolic process	PF00722 PF06955|PF00722 PF06955	PTHR31062 PTHR31062:SF15|PTHR31062 PTHR31062:SF15	EC:2.4.1.207 EC:3.2.1.151|EC:2.4.1.207 EC:3.2.1.151
Potri.002G022700	37.5137	1.3758	-4.76908	1.78717e-10	5.61407e-09	yes	Chr02:1416357-1417225	+	Chr02:1416357-1417225	+	-	-	-	-	-	-	PF02704	PTHR23201 PTHR23201:SF2		AT1G75750	GAST1 protein homolog 1
Potri.011G032900	27.3882	100.799	1.87986	1.80125e-10	5.65247e-09	yes	Chr11:2642733-2645120	-	Chr11:2642733-2645120	-	-	-	-	-	-	-		PTHR31346 PTHR31346:SF3|PTHR31346 PTHR31346:SF3|PTHR31346 PTHR31346:SF3		AT1G11430|AT1G11430|AT1G11430	plastid developmental protein DAG, putative|plastid developmental protein DAG, putative|plastid developmental protein DAG, putative
Potri.014G034000	37.7521	0	-6.85672	1.85402e-10	5.81206e-09	yes	Chr14:2112740-2114921	+	Chr14:2112740-2114921	+	-	-	-	-	-	GO:0006629/lipid metabolic process	PF01734	PTHR32176		AT2G26560	phospholipase A 2A
Potri.004G217000	13.6698	72.3197	2.40339	1.86031e-10	5.82578e-09	yes	Chr04:22264060-22268451	-	Chr04:22264060-22268451	-	09120 Genetic Information Processing|09180 Brite Hierarchies	09122 Translation|09182 Protein families: genetic information processing	ko03010 Ribosome|ko03011 Ribosome	GO:0005840/ribosome|GO:0005622/intracellular	GO:0003735/structural constituent of ribosome	GO:0006412/translation	PF01281 PF03948	PTHR21368 PTHR21368:SF18		AT3G44890	ribosomal protein L9
Potri.006G127200	33.4355	112.137	1.74581	1.88625e-10	5.90095e-09	yes	Chr06:10240785-10244056	+	Chr06:10240785-10244056	+	09160 Human Diseases|09180 Brite Hierarchies	09171 Infectious disease: bacterial|09182 Protein families: genetic information processing	ko05130 Pathogenic Escherichia coli infection|ko03009 Ribosome biogenesis|ko03036 Chromosome and associated proteins	-	GO:0003676/nucleic acid binding	-	PF00076|PF00076|PF00076	PTHR24012|PTHR24012|PTHR24012		AT3G53460|AT3G53460|AT3G53460	chloroplast RNA-binding protein 29|chloroplast RNA-binding protein 29|chloroplast RNA-binding protein 29
Potri.005G075900	153.944	66.7709	-1.20511	1.88846e-10	5.90177e-09	yes	Chr05:5104861-5107654	+	Chr05:5104861-5107654	+	09180 Brite Hierarchies	09183 Protein families: signaling and cellular processes	ko02044 Secretion system|ko04147 Exosome	-	GO:0005544/calcium-dependent phospholipid binding|GO:0005509/calcium ion binding	-	PF00191	PTHR10502 PTHR10502:SF98		AT5G10230	annexin 7
Potri.008G172100	13.382	71.5297	2.41825	1.9945e-10	6.22676e-09	yes	Chr08:11882757-11885794	+	Chr08:11882757-11885794	+	-	-	-	-	GO:0003676/nucleic acid binding	-	PF00076	PTHR24012		AT1G60000	RNA-binding (RRM/RBD/RNP motifs) family protein
Potri.016G049400	63.4083	12.2437	-2.37264	2.01005e-10	6.26888e-09	yes	Chr16:3212604-3213795	+	Chr16:3212604-3213795	+	-	-	-	-	GO:0005515/protein binding	-	PF00560 PF08263	PTHR27000 PTHR27000:SF136		AT5G06870	polygalacturonase inhibiting protein 2
Potri.018G056200	9.30314	61.8593	2.7332	2.04257e-10	6.36378e-09	yes	Chr18:5548544-5553684	+	Chr18:5548544-5553684	+	09190 Not Included in Pathway or Brite	09191 Unclassified: metabolism	ko99985 Amino acid metabolism	-	-	-	PF00903|PF00903|PF00903	PTHR21366 PTHR21366:SF4|PTHR21366 PTHR21366:SF4|PTHR21366 PTHR21366:SF4	EC:5.1.99.1|EC:5.1.99.1|EC:5.1.99.1	AT5G57040|AT5G57040|AT5G57040	Lactoylglutathione lyase / glyoxalase I family protein|Lactoylglutathione lyase / glyoxalase I family protein|Lactoylglutathione lyase / glyoxalase I family protein
Potri.017G096500	11.3631	66.7808	2.55507	2.08472e-10	6.48844e-09	yes	Chr17:11001141-11001871	+	Chr17:11001141-11001871	+	-	-	-	-	-	-	PF05498	PTHR39112		AT3G29780	ralf-like 27
Potri.002G196700	44.2395	131.249	1.5689	2.16207e-10	6.7223e-09	yes	Chr02:15942125-15943331	+	Chr02:15942125-15943331	+	-	-	-	-	-	GO:0006950/response to stress	PF00582	PTHR31964 PTHR31964:SF52		AT3G62550	Adenine nucleotide alpha hydrolases-like superfamily protein
Potri.001G084500	6.17185	53.6825	3.12068	2.1704e-10	6.74133e-09	yes	Chr01:6759543-6760867	+	Chr01:6759543-6760867	+	-	-	-	-	-	-		PTHR36383		AT4G24090
Potri.015G065100	22.166	90.0192	2.02188	2.21666e-10	6.87799e-09	yes	Chr15:9050636-9051720	+	Chr15:9050636-9051720	+	-	-	-	-	-	-	PF06549	PTHR31425 PTHR31425:SF3		AT1G74730	Protein of unknown function (DUF1118)
Potri.016G104600	122.632	46.2786	-1.40592	2.21753e-10	6.87366e-09	yes	Chr16:10747122-10748703	-	Chr16:10747122-10748703	-	-	-	-	-	-	GO:0006950/response to stress	PF00582	PTHR31964 PTHR31964:SF23		AT3G53990	Adenine nucleotide alpha hydrolases-like superfamily protein
Potri.002G034400	69.169	172.97	1.32233	2.25192e-10	6.97315e-09	yes	Chr02:2275713-2278575	-	Chr02:2275713-2278575	-	-	-	-	-	GO:0003854/3-beta-hydroxy-delta5-steroid dehydrogenase activity|GO:0016616/oxidoreductase activity, acting on the CH-OH group of donors, NAD or NADP as acceptor|GO:0016491/oxidoreductase activity|GO:0050662/coenzyme binding	GO:0055114/oxidation-reduction process|GO:0044237/cellular metabolic process|GO:0006694/steroid biosynthetic process	PF01370	PTHR10366 PTHR10366:SF391		AT1G75300	NmrA-like negative transcriptional regulator family protein
Potri.002G023600	3.84158	47.0423	3.61419	2.25218e-10	6.96686e-09	yes	Chr02:1471769-1474421	+	Chr02:1471769-1474421	+	-	-	-	-	-	-		PTHR15852 PTHR15852:SF27	EC:5.3.4.1	AT1G75690	DnaJ/Hsp40 cysteine-rich domain superfamily protein
Potri.008G135860	43.23	3.65813	-3.56286	2.26477e-10	6.99869e-09	yes	Chr08:9067043-9068219	-	Chr08:9067043-9068219	-	-	-	-	-	-	-	PF14547	PTHR31731 PTHR31731:SF25
Potri.006G004300	0	39.2569	6.8456	2.28467e-10	7.05301e-09	yes	Chr06:329367-334416	+	Chr06:329367-334416	+	-	-	-	GO:0016020/membrane	GO:0016760/cellulose synthase (UDP-forming) activity	GO:0030244/cellulose biosynthetic process	PF03552	PTHR13301 PTHR13301:SF67	EC:2.4.1.12	AT1G55850	cellulose synthase like E1
Potri.001G452600	36.1995	0	-6.12177	2.33168e-10	7.19085e-09	yes	Chr01:47956525-47958951	+	Chr01:47956525-47958951	+	-	-	-	-	GO:0008270/zinc ion binding|GO:0016491/oxidoreductase activity	GO:0055114/oxidation-reduction process	PF08240 PF13602	PTHR11695 PTHR11695:SF507	EC:1.6.5.5
Potri.011G059500	37.3821	0	-6.89949	2.39477e-10	7.37794e-09	yes	Chr11:4983138-4984721	-	Chr11:4983138-4984721	-	09100 Metabolism	09110 Biosynthesis of other secondary metabolites	ko00943 Isoflavonoid biosynthesis	-	GO:0046983/protein dimerization activity|GO:0008171/O-methyltransferase activity	-	PF00891 PF08100	PTHR11746 PTHR11746:SF99
Potri.017G124300	73.3679	17.4213	-2.0743	2.44496e-10	7.52495e-09	yes	Chr17:12857934-12863464	-	Chr17:12857934-12863464	-	-	-	-	-	-	-	PF10151	PTHR13448 PTHR13448:SF1
Potri.001G401500	42.1406	127.234	1.5942	2.44725e-10	7.52436e-09	yes	Chr01:42755731-42756679	+	Chr01:42755731-42756679	+	09150 Organismal Systems|09160 Human Diseases|09180 Brite Hierarchies	09151 Immune system|09166 Cardiovascular disease|09182 Protein families: genetic information processing	ko04621 NOD-like receptor signaling pathway|ko05418 Fluid shear stress and atherosclerosis|ko03110 Chaperones and folding catalysts	-	GO:0015035/protein disulfide oxidoreductase activity|GO:0009055/electron transfer activity	GO:0006662/glycerol ether metabolic process|GO:0045454/cell redox homeostasis	PF13098	PTHR10438 PTHR10438:SF255	EC:1.8.1.8	AT3G15360	thioredoxin M-type 4
Potri.005G053800	11.6648	67.0388	2.52284	2.62696e-10	8.06875e-09	yes	Chr05:3411664-3413328	-	Chr05:3411664-3413328	-	09130 Environmental Information Processing	09132 Signal transduction	ko04075 Plant hormone signal transduction	GO:0005634/nucleus	-	GO:0006355/regulation of transcription, DNA-templated	PF02309	PTHR31734 PTHR31734:SF23		AT1G04240	AUX/IAA transcriptional regulator family protein
Potri.006G027700	83.8739	23.2287	-1.85231	2.77308e-10	8.50898e-09	yes	Chr06:1795155-1803259	+	Chr06:1795155-1803259	+	09100 Metabolism	09101 Carbohydrate metabolism	ko00520 Amino sugar and nucleotide sugar metabolism	-	GO:0046556/alpha-L-arabinofuranosidase activity	GO:0046373/L-arabinose metabolic process	PF06964	PTHR31776 PTHR31776:SF0	EC:3.2.1.55	AT5G26120	alpha-L-arabinofuranosidase 2
Potri.004G179300	7.34054	56.1919	2.9364	2.9936e-10	9.17634e-09	yes	Chr04:19354393-19357230	-	Chr04:19354393-19357230	-	09180 Brite Hierarchies	09181 Protein families: metabolism	ko01003 Glycosyltransferases	-	GO:0016758/transferase activity, transferring hexosyl groups	GO:0008152/metabolic process	PF04101	PTHR11926 PTHR11926:SF271		AT1G05675	UDP-Glycosyltransferase superfamily protein
Potri.004G076000	48.7046	5.99115	-3.02315	3.00949e-10	9.21578e-09	yes	Chr04:6333193-6335775	-	Chr04:6333193-6335775	-	09100 Metabolism|09180 Brite Hierarchies	09101 Carbohydrate metabolism|09181 Protein families: metabolism	ko00620 Pyruvate metabolism|ko01002 Peptidases and inhibitors	-	-	-	PF01965	PTHR11019 PTHR11019:SF112	EC:4.4.1.5	AT3G02720	Class I glutamine amidotransferase-like superfamily protein
Potri.001G024900	17.0451	78.7024	2.20705	3.06889e-10	9.38821e-09	yes	Chr01:1876939-1879525	+	Chr01:1876939-1879525	+	-	-	-	-	GO:0005544/calcium-dependent phospholipid binding|GO:0005509/calcium ion binding	-	PF00191	PTHR10502 PTHR10502:SF104		AT2G38750	annexin 4
Potri.004G233900	104.848	35.6297	-1.55715	3.07082e-10	9.38468e-09	yes	Chr04:23864058-23867468	-	Chr04:23864058-23867468	-	09130 Environmental Information Processing	09132 Signal transduction	ko04310 Wnt signaling pathway	-	-	-	PF03283|PF03283	PTHR21562 PTHR21562:SF4|PTHR21562 PTHR21562:SF4		AT4G19410|AT4G19410	Pectinacetylesterase family protein|Pectinacetylesterase family protein
Potri.006G267700	66.0352	166.744	1.33633	3.3191e-10	1.01332e-08	yes	Chr06:26229913-26232733	-	Chr06:26229913-26232733	-	-	-	-	GO:0005622/intracellular	GO:0005515/protein binding|GO:0008270/zinc ion binding	-	PF00643 PF06203	PTHR31319 PTHR31319:SF6		AT5G24930	CONSTANS-like 4
Potri.018G102700	4.73787	48.9486	3.36896	3.34106e-10	1.01901e-08	yes	Chr18:12245528-12249276	+	Chr18:12245528-12249276	+	09120 Genetic Information Processing|09180 Brite Hierarchies	09122 Translation|09182 Protein families: genetic information processing	ko03010 Ribosome|ko03011 Ribosome	GO:0005840/ribosome|GO:0005622/intracellular	GO:0003735/structural constituent of ribosome	GO:0006412/translation	PF01632	PTHR33343 PTHR33343:SF1		AT2G24090	Ribosomal protein L35
Potri.004G068901	24.591	93.7942	1.93137	3.56194e-10	1.08528e-08	yes	Chr04:5848570-5849098	+	Chr04:5848570-5849098	+	-	-	-	-	-	-
Potri.003G038500	69.2379	171.687	1.31014	3.59888e-10	1.09544e-08	yes	Chr03:4287750-4295185	+	Chr03:4287750-4295185	+	-	-	-	GO:0009341/beta-galactosidase complex	GO:0004553/hydrolase activity, hydrolyzing O-glycosyl compounds|GO:0004565/beta-galactosidase activity	GO:0005975/carbohydrate metabolic process	PF01301 PF02140|PF01301 PF02140|PF01301 PF02140	PTHR23421 PTHR23421:SF74|PTHR23421 PTHR23421:SF74|PTHR23421 PTHR23421:SF74	EC:3.2.1.23|EC:3.2.1.23|EC:3.2.1.23	AT3G13750|AT3G13750|AT3G13750	beta galactosidase 1|beta galactosidase 1|beta galactosidase 1
Potri.003G140400	14.7881	73.2469	2.30833	4.04359e-10	1.22957e-08	yes	Chr03:15669208-15670076	-	Chr03:15669208-15670076	-	-	-	-	-	-	-	PF11623	PTHR35494 PTHR35494:SF1		AT4G23890	(1 of 1) PF11623 - Protein of unknown function (DUF3252) (DUF3252)
Potri.004G217100	37.9344	2.08119	-4.18802	4.24744e-10	1.28898e-08	yes	Chr04:22280816-22283327	+	Chr04:22280816-22283327	+	-	-	-	GO:0005622/intracellular	GO:0008270/zinc ion binding	-		PTHR10593 PTHR10593:SF41|PTHR10593 PTHR10593:SF41		AT5G22890|AT5G22890	C2H2 and C2HC zinc fingers superfamily protein|C2H2 and C2HC zinc fingers superfamily protein
Potri.005G252250	40.0592	2.86453	-3.80576	4.28462e-10	1.29897e-08	yes	Chr05:24517837-24520160	+	Chr05:24517837-24520160	+	-	-	-	-	-	-	PF05742	PTHR17985 PTHR17985:SF13		AT4G38260	Protein of unknown function (DUF833)
Potri.011G080900	0	41.9605	8.13485	4.29353e-10	1.30038e-08	yes	Chr11:8749642-8753355	+	Chr11:8749642-8753355	+	-	-	-	-	-	-	PF04481	PTHR36895 PTHR36895:SF1	EC:5.3.1.27
Potri.007G103200	66.0727	14.2419	-2.21391	4.29456e-10	1.29939e-08	yes	Chr07:12660900-12663170	+	Chr07:12660900-12663170	+	-	-	-	-	GO:0008168/methyltransferase activity	GO:0008152/metabolic process	PF08241	PTHR10108 PTHR10108:SF781	EC:2.1.1.145	AT4G22530	S-adenosyl-L-methionine-dependent methyltransferases superfamily protein
Potri.009G095400	10.2487	62.5887	2.61046	4.65989e-10	1.40853e-08	yes	Chr09:8609147-8611128	-	Chr09:8609147-8611128	-	-	-	-	-	GO:0016758/transferase activity, transferring hexosyl groups	GO:0008152/metabolic process	PF00201	PTHR11926 PTHR11926:SF167		AT4G15500	UDP-Glycosyltransferase superfamily protein
Potri.016G089500	44.9999	4.83011	-3.21979	4.92953e-10	1.48707e-08	yes	Chr16:7227109-7228739	+	Chr16:7227109-7228739	+	09180 Brite Hierarchies	09183 Protein families: signaling and cellular processes	ko02000 Transporters	GO:0016020/membrane	GO:0005215/transporter activity	GO:0006810/transport	PF00230	PTHR19139 PTHR19139:SF167		AT3G53420	plasma membrane intrinsic protein 2A
Potri.013G044900	5.68722	50.8877	3.16152	4.96246e-10	1.49552e-08	yes	Chr13:3115627-3117249	-	Chr13:3115627-3117249	-	-	-	-	-	-	-		PTHR35299 PTHR35299:SF2|PTHR35299 PTHR35299:SF2		AT5G28500|AT5G28500	(1 of 2) PTHR35299:SF2 - RUBISCO ACCUMULATION FACTOR 1, CHLOROPLASTIC-RELATED|(1 of 2) PTHR35299:SF2 - RUBISCO ACCUMULATION FACTOR 1, CHLOROPLASTIC-RELATED
Potri.004G110620	100.704	33.7893	-1.57549	5.01703e-10	1.51047e-08	yes	Chr04:9949205-9952317	+	Chr04:9949205-9952317	+	09100 Metabolism	09101 Carbohydrate metabolism|09106 Metabolism of other amino acids|09110 Biosynthesis of other secondary metabolites	ko00500 Starch and sucrose metabolism|ko00460 Cyanoamino acid metabolism|ko00940 Phenylpropanoid biosynthesis	-	-	-	PF00232	PTHR10353 PTHR10353:SF37	EC:3.2.1.21	AT2G44490	Glycosyl hydrolase superfamily protein
Potri.016G112400	1.72384	39.2298	4.50825	5.03533e-10	1.51448e-08	yes	Chr16:11560594-11562432	+	Chr16:11560594-11562432	+	-	-	-	-	GO:0016747/transferase activity, transferring acyl groups other than amino-acyl groups	-	PF02458	PTHR31896 PTHR31896:SF5	EC:2.3.1.133 EC:2.3.1.99	AT5G01210	HXXXD-type acyl-transferase family protein
Potri.015G054100	9.2437	60.0089	2.69863	5.04604e-10	1.51621e-08	yes	Chr15:7198683-7200280	-	Chr15:7198683-7200280	-	-	-	-	-	-	-		PTHR36004 PTHR36004:SF1		AT1G73885
Potri.011G123300	28.4013	100.309	1.82042	5.13779e-10	1.54225e-08	yes	Chr11:15359474-15361562	+	Chr11:15359474-15361562	+	-	-	-	-	GO:0003677/DNA binding	GO:0006355/regulation of transcription, DNA-templated	PF02365	PTHR31719 PTHR31719:SF39		AT4G27410	NAC (No Apical Meristem) domain transcriptional regulator superfamily protein
Potri.008G177900	51.8279	7.70509	-2.74984	5.18979e-10	1.55632e-08	yes	Chr08:12280660-12289503	+	Chr08:12280660-12289503	+	09100 Metabolism	09104 Nucleotide metabolism|09105 Amino acid metabolism|09111 Xenobiotics biodegradation and metabolism	ko00230 Purine metabolism|ko00220 Arginine biosynthesis|ko00791 Atrazine degradation	-	GO:0016787/hydrolase activity	GO:0006807/nitrogen compound metabolic process	PF00449 PF00547 PF00699 PF01979|PF00449 PF00547 PF00699 PF01979|PF00449 PF00699 PF01979|PF00449 PF00699 PF01979	PTHR22642 PTHR22642:SF7|PTHR22642 PTHR22642:SF7|PTHR22642 PTHR22642:SF7|PTHR22642 PTHR22642:SF7	EC:3.5.1.5|EC:3.5.1.5|EC:3.5.1.5|EC:3.5.1.5	AT1G67550|AT1G67550|AT1G67550|AT1G67550	urease|urease|urease|urease
Potri.001G268600	7.10408	54.556	2.94102	5.23762e-10	1.56912e-08	yes	Chr01:28353893-28356173	-	Chr01:28353893-28356173	-	09100 Metabolism	09110 Biosynthesis of other secondary metabolites	ko00940 Phenylpropanoid biosynthesis	-	GO:0008270/zinc ion binding|GO:0016491/oxidoreductase activity	GO:0055114/oxidation-reduction process	PF00107 PF08240	PTHR11695 PTHR11695:SF497	EC:1.1.1.195	AT4G37990	elicitor-activated gene 3-2
Potri.002G189900	185.86	91.4601	-1.02301	5.48772e-10	1.64243e-08	yes	Chr02:15175644-15180775	-	Chr02:15175644-15180775	-	09100 Metabolism	09101 Carbohydrate metabolism|09103 Lipid metabolism|09105 Amino acid metabolism|09106 Metabolism of other amino acids|09109 Metabolism of terpenoids and polyketides|09111 Xenobiotics biodegradation and metabolism	ko00010 Glycolysis / Gluconeogenesis|ko00053 Ascorbate and aldarate metabolism|ko00620 Pyruvate metabolism|ko00071 Fatty acid degradation|ko00561 Glycerolipid metabolism|ko00280 Valine, leucine and isoleucine degradation|ko00310 Lysine degradation|ko00330 Arginine and proline metabolism|ko00340 Histidine metabolism|ko00380 Tryptophan metabolism|ko00410 beta-Alanine metabolism|ko00981 Insect hormo…	-	GO:0016491/oxidoreductase activity	GO:0055114/oxidation-reduction process	PF00171	PTHR11699 PTHR11699:SF180	EC:1.2.1.3	AT1G23800	aldehyde dehydrogenase 2B7
Potri.003G089900	5.49918	50.1848	3.18996	5.51732e-10	1.64966e-08	yes	Chr03:11629180-11630150	-	Chr03:11629180-11630150	-	-	-	-	-	-	-	PF07534	PTHR14241 PTHR14241:SF11		AT1G32520	(1 of 1) PTHR14241//PTHR14241:SF11 - INTERFERON-INDUCED PROTEIN 44
Potri.011G064800	7.64444	55.8457	2.86896	5.53225e-10	1.6525e-08	yes	Chr11:5532163-5533845	+	Chr11:5532163-5533845	+	09120 Genetic Information Processing|09180 Brite Hierarchies	09122 Translation|09182 Protein families: genetic information processing	ko03010 Ribosome|ko03011 Ribosome	GO:0005840/ribosome|GO:0005622/intracellular	GO:0003735/structural constituent of ribosome	GO:0006412/translation	PF00468	PTHR14503 PTHR14503:SF3		AT1G29070	Ribosomal protein L34
Potri.014G108700	52.9768	8.28014	-2.67763	5.68807e-10	1.69738e-08	yes	Chr14:7294413-7295176	-	Chr14:7294413-7295176	-	-	-	-	-	-	-		PTHR34376 PTHR34376:SF1
Potri.016G061500	102.952	35.3787	-1.54102	5.86702e-10	1.74906e-08	yes	Chr16:4261822-4272158	-	Chr16:4261822-4272158	-	-	-	-	-	GO:0005515/protein binding|GO:0005524/ATP binding|GO:0004672/protein kinase activity	GO:0006468/protein phosphorylation	PF00560 PF05498 PF07714 PF11721	PTHR27006 PTHR27006:SF37	EC:2.7.11.1
Potri.014G102400	6.56197	52.9107	3.01136	5.93415e-10	1.76734e-08	yes	Chr14:6781962-6784127	+	Chr14:6781962-6784127	+	-	-	-	-	-	-	PF13301	PTHR34679 PTHR34679:SF2		AT3G61870	(1 of 2) PF13301 - Protein of unknown function (DUF4079) (DUF4079)
Potri.014G180300	0	36.5563	6.19205	6.01054e-10	1.78659e-08	yes	Chr14:13917658-13921186	+	Chr14:13917658-13921186	+	09100 Metabolism	09103 Lipid metabolism	ko00073 Cutin, suberine and wax biosynthesis	-	GO:0005506/iron ion binding|GO:0016491/oxidoreductase activity	GO:0055114/oxidation-reduction process|GO:0006633/fatty acid biosynthetic process	PF04116 PF12076	PTHR11863 PTHR11863:SF41		AT1G02205	Fatty acid hydroxylase superfamily
Potri.009G022800	39.6824	0	-8.16664	6.03366e-10	1.79171e-08	yes	Chr09:3500916-3503880	-	Chr09:3500916-3503880	-	-	-	-	-	GO:0016706/oxidoreductase activity, acting on paired donors, with incorporation or reduction of molecular oxygen, 2-oxoglutarate as one donor, and incorporation of one atom each of oxygen into both donors|GO:0016491/oxidoreductase activity	GO:0055114/oxidation-reduction process	PF03171 PF14226	PTHR10209 PTHR10209:SF125	EC:4.2.1.78
Potri.001G180500	59.8301	11.4943	-2.37995	6.05363e-10	1.79589e-08	yes	Chr01:15840724-15841453	-	Chr01:15840724-15841453	-	-	-	-	-	-	-		PTHR33168 PTHR33168:SF6		AT2G25735	(1 of 1) PTHR33168:SF12 - EXPRESSED PROTEIN
Potri.005G060300	42.6089	0	-8.80903	6.21985e-10	1.84161e-08	yes	Chr05:3813839-3816789	+	Chr05:3813839-3816789	+	09100 Metabolism	09101 Carbohydrate metabolism|09103 Lipid metabolism|09105 Amino acid metabolism	ko00010 Glycolysis / Gluconeogenesis|ko00071 Fatty acid degradation|ko00592 alpha-Linolenic acid metabolism|ko00350 Tyrosine metabolism	-	GO:0008270/zinc ion binding|GO:0016491/oxidoreductase activity	GO:0055114/oxidation-reduction process	PF00107 PF08240	PTHR11695 PTHR11695:SF576	EC:1.1.1.1	AT1G77120	alcohol dehydrogenase 1
Potri.006G010000	0	64.8256	11.426	6.3871e-10	1.88929e-08	yes	Chr06:653066-655647	-	Chr06:653066-655647	-	-	-	-	-	GO:0016758/transferase activity, transferring hexosyl groups	GO:0008152/metabolic process	PF00201|PF00201	PTHR11926 PTHR11926:SF242|PTHR11926 PTHR11926:SF242
Potri.002G155600	59.0293	11.1594	-2.40318	6.3917e-10	1.88881e-08	yes	Chr02:11882880-11885038	+	Chr02:11882880-11885038	+	-	-	-	-	GO:0005515/protein binding	-	PF00168	PTHR10774 PTHR10774:SF58		AT1G63220	Calcium-dependent lipid-binding (CaLB domain) family protein
Potri.005G069100	1.30822	37.6086	4.84539	6.39392e-10	1.88764e-08	yes	Chr05:4481079-4483447	-	Chr05:4481079-4483447	-	09100 Metabolism	09109 Metabolism of terpenoids and polyketides	ko00906 Carotenoid biosynthesis	-	-	-	PF03055	PTHR10543 PTHR10543:SF46	EC:1.13.11.51 EC:1.14.99.42	AT4G19170	nine-cis-epoxycarotenoid dioxygenase 4
Potri.010G012400	0	36.9629	6.68281	6.55556e-10	1.93348e-08	yes	Chr10:2254071-2255992	-	Chr10:2254071-2255992	-	-	-	-	-	-	-		PTHR34458 PTHR34458:SF5		AT3G16670	Pollen Ole e 1 allergen and extensin family protein
Potri.006G219800	52.2852	142.046	1.44189	6.64304e-10	1.95738e-08	yes	Chr06:22505894-22508457	+	Chr06:22505894-22508457	+	-	-	-	-	-	-		PTHR33172 PTHR33172:SF6|PTHR33172 PTHR33172:SF6		AT5G21940|AT5G21940
Potri.006G017500	15.0379	72.7617	2.27458	6.70177e-10	1.97277e-08	yes	Chr06:1100334-1101744	+	Chr06:1100334-1101744	+	-	-	-	-	-	-	PF05421	PTHR36049 PTHR36049:SF3		AT4G16410	(1 of 1) PF05421 - Protein of unknown function (DUF751) (DUF751)
Potri.013G109000	1.62489	38.4415	4.56425	6.70296e-10	1.97122e-08	yes	Chr13:11749928-11751198	+	Chr13:11749928-11751198	+	-	-	-	-	GO:0031072/heat shock protein binding	-	PF00226	PTHR24078 PTHR24078:SF250		AT4G09350	Chaperone DnaJ-domain superfamily protein
Potri.006G090000	61.4444	12.3696	-2.31248	6.74052e-10	1.98035e-08	yes	Chr06:6856358-6862822	-	Chr06:6856358-6862822	-	-	-	-	-	-	-	PF14215|PF14215|PF14215	PTHR13902 PTHR13902:SF5|PTHR13902 PTHR13902:SF5|PTHR13902 PTHR13902:SF5
Potri.017G014200	15.295	73.3069	2.26089	6.74593e-10	1.98002e-08	yes	Chr17:991158-993652	+	Chr17:991158-993652	+	09100 Metabolism|09180 Brite Hierarchies	09105 Amino acid metabolism|09108 Metabolism of cofactors and vitamins|09110 Biosynthesis of other secondary metabolites|09181 Protein families: metabolism	ko00270 Cysteine and methionine metabolism|ko00350 Tyrosine metabolism|ko00360 Phenylalanine metabolism|ko00400 Phenylalanine, tyrosine and tryptophan biosynthesis|ko00130 Ubiquinone and other terpenoid-quinone biosynthesis|ko00950 Isoquinoline alkaloid biosynthesis|ko00960 Tropane, piperidine and pyridine alkaloid biosynthesis|ko00401 Novobiocin biosynthesis|ko01007 Amino acid related enzymes	-	GO:0016829/lyase activity|GO:0030170/pyridoxal phosphate binding|GO:0016769/transferase activity, transferring nitrogenous groups	GO:0009058/biosynthetic process|GO:0006520/cellular amino acid metabolic process	PF00155	PTHR11751 PTHR11751:SF363	EC:2.6.1.80	AT5G36160	Tyrosine transaminase family protein
Potri.005G228700	35.4797	1.44549	-4.61736	6.85179e-10	2.00915e-08	yes	Chr05:22856368-22858947	+	Chr05:22856368-22858947	+	-	-	-	-	GO:0003854/3-beta-hydroxy-delta5-steroid dehydrogenase activity|GO:0016616/oxidoreductase activity, acting on the CH-OH group of donors, NAD or NADP as acceptor|GO:0016491/oxidoreductase activity|GO:0050662/coenzyme binding	GO:0055114/oxidation-reduction process|GO:0044237/cellular metabolic process|GO:0006694/steroid biosynthetic process	PF01370	PTHR10366 PTHR10366:SF391		AT1G75300	NmrA-like negative transcriptional regulator family protein
Potri.005G032700	46.459	5.63698	-3.04297	6.85647e-10	2.00859e-08	yes	Chr05:2166182-2170763	+	Chr05:2166182-2170763	+	09100 Metabolism	09103 Lipid metabolism	ko00591 Linoleic acid metabolism	-	GO:0046872/metal ion binding|GO:0005515/protein binding|GO:0016702/oxidoreductase activity, acting on single donors with incorporation of molecular oxygen, incorporation of two atoms of oxygen	GO:0055114/oxidation-reduction process	PF00305 PF01477|PF00305	PTHR11771 PTHR11771:SF48|PTHR11771 PTHR11771:SF48	EC:1.13.11.58|EC:1.13.11.58	AT1G55020|AT1G55020	lipoxygenase 1|lipoxygenase 1
Potri.001G258100	1.90204	39.0713	4.36049	7.57032e-10	2.21558e-08	yes	Chr01:27358056-27360751	+	Chr01:27358056-27360751	+	-	-	-	-	-	-	PF02341	PTHR33791 PTHR33791:SF4		AT5G19855	Chaperonin-like RbcX protein
Potri.005G052000	4.43092	46.5991	3.39463	7.75136e-10	2.26638e-08	yes	Chr05:3290174-3291382	-	Chr05:3290174-3291382	-	09100 Metabolism	09101 Carbohydrate metabolism|09102 Energy metabolism	ko00030 Pentose phosphate pathway|ko00710 Carbon fixation in photosynthetic organisms	-	GO:0004751/ribose-5-phosphate isomerase activity	GO:0009052/pentose-phosphate shunt, non-oxidative branch	PF06026	PTHR11934 PTHR11934:SF0	EC:5.3.1.6	AT3G04790	Ribose 5-phosphate isomerase, type A protein
Potri.011G108900	5.62178	49.7321	3.14508	8.57863e-10	2.50585e-08	yes	Chr11:13870314-13872339	-	Chr11:13870314-13872339	-	-	-	-	-	-	-		PTHR31723		AT1G78780	pathogenesis-related family protein
Potri.003G126800	3.17545	42.6642	3.74799	9.00947e-10	2.62918e-08	yes	Chr03:14628829-14632295	-	Chr03:14628829-14632295	-	09140 Cellular Processes|09160 Human Diseases|09180 Brite Hierarchies	09141 Transport and catabolism|09144 Cellular community - eukaryotes|09171 Infectious disease: bacterial|09182 Protein families: genetic information processing|09183 Protein families: signaling and cellular processes	ko04145 Phagosome|ko04540 Gap junction|ko05130 Pathogenic Escherichia coli infection|ko03036 Chromosome and associated proteins|ko04812 Cytoskeleton proteins|ko04147 Exosome	GO:0005874/microtubule	GO:0003924/GTPase activity|GO:0005525/GTP binding	GO:0007017/microtubule-based process|GO:0051258/protein polymerization|GO:0006184/obsolete GTP catabolic process	PF00091 PF03953	PTHR11588 PTHR11588:SF124	EC:2.4.2.1
Potri.010G027800	4.63182	46.8873	3.33955	9.10091e-10	2.65331e-08	yes	Chr10:4001005-4008528	-	Chr10:4001005-4008528	-	09100 Metabolism	09101 Carbohydrate metabolism|09102 Energy metabolism	ko00620 Pyruvate metabolism|ko00710 Carbon fixation in photosynthetic organisms|ko00720 Carbon fixation pathways in prokaryotes	-	GO:0016301/kinase activity|GO:0005524/ATP binding	GO:0016310/phosphorylation	PF00391 PF01326 PF02896	PTHR22931 PTHR22931:SF9	EC:2.7.9.1	AT4G15530	pyruvate orthophosphate dikinase
Potri.012G128100	139.277	59.6766	-1.22272	9.184e-10	2.67497e-08	yes	Chr12:14392725-14394380	-	Chr12:14392725-14394380	-	-	-	-	-	-	-	PF04674	PTHR31279 PTHR31279:SF7		AT5G51550	EXORDIUM like 3
Potri.003G205800	36.7112	2.09122	-4.1338	9.21438e-10	2.68125e-08	yes	Chr03:20479154-20480720	+	Chr03:20479154-20480720	+	-	-	-	-	GO:0005524/ATP binding|GO:0004672/protein kinase activity	GO:0006468/protein phosphorylation	PF00069 PF07714	PTHR24351 PTHR24351:SF107	EC:2.7.11.1	AT1G51170	Protein kinase superfamily protein
Potri.010G148300	34.7233	1.34645	-4.68867	9.36847e-10	2.72349e-08	yes	Chr10:15914714-15915237	-	Chr10:15914714-15915237	-	-	-	-	-	-	-		PTHR33726 PTHR33726:SF1		AT5G49525
Potri.007G120401	51.0123	7.81961	-2.70568	9.66962e-10	2.80567e-08	yes	Chr07:13825327-13826205	+	Chr07:13825327-13826205	+	-	-	-	-	-	-	PF01657	PTHR32411		AT3G22060	Receptor-like protein kinase-related family protein
Potri.001G449500	25.7655	93.7469	1.86333	9.89721e-10	2.86623e-08	yes	Chr01:47562349-47567119	-	Chr01:47562349-47567119	-	09100 Metabolism|09180 Brite Hierarchies	09101 Carbohydrate metabolism|09181 Protein families: metabolism	ko00500 Starch and sucrose metabolism|ko01003 Glycosyltransferases	-	-	GO:0009058/biosynthetic process	PF00534 PF08323|PF00534 PF08323|PF00534 PF08323|PF00534 PF08323|PF00534 PF08323	PTHR12526 PTHR12526:SF383|PTHR12526 PTHR12526:SF383|PTHR12526 PTHR12526:SF383|PTHR12526 PTHR12526:SF383|PTHR12526 PTHR12526:SF383	EC:2.4.1.242|EC:2.4.1.242|EC:2.4.1.242|EC:2.4.1.242|EC:2.4.1.242	AT1G32900|AT1G32900|AT1G32900|AT1G32900|AT1G32900	UDP-Glycosyltransferase superfamily protein|UDP-Glycosyltransferase superfamily protein|UDP-Glycosyltransferase superfamily protein|UDP-Glycosyltransferase superfamily protein|UDP-Glycosyltransferase superfamily protein
Potri.004G096000	17.2442	76.6532	2.15224	9.96135e-10	2.88206e-08	yes	Chr04:8251656-8251937	+	Chr04:8251656-8251937	+	-	-	-	-	-	-	PF14368	PTHR33214 PTHR33214:SF6		AT1G48750	Bifunctional inhibitor/lipid-transfer protein/seed storage 2S albumin superfamily protein
Potri.013G156500	98.8402	214.266	1.11623	1.07599e-09	3.11013e-08	yes	Chr13:15167030-15169830	-	Chr13:15167030-15169830	-	09100 Metabolism	09110 Biosynthesis of other secondary metabolites	ko00940 Phenylpropanoid biosynthesis	-	GO:0020037/heme binding|GO:0004601/peroxidase activity	GO:0055114/oxidation-reduction process|GO:0006979/response to oxidative stress	PF00141	PTHR31388 PTHR31388:SF12	EC:1.11.1.7
Potri.015G007600	124.519	50.0684	-1.31439	1.07675e-09	3.10938e-08	yes	Chr15:453323-455650	-	Chr15:453323-455650	-	-	-	-	-	GO:0020037/heme binding	-	PF00173	PTHR19359 PTHR19359:SF22
Potri.009G009300	63.522	159.055	1.3242	1.13069e-09	3.26206e-08	yes	Chr09:1780498-1784727	-	Chr09:1780498-1784727	-	-	-	-	-	GO:0005524/ATP binding	GO:0044267/cellular protein metabolic process	PF00118	PTHR11353 PTHR11353:SF11		AT2G28000	chaperonin-60alpha
Potri.019G131800	35.6001	1.80325	-4.30321	1.13085e-09	3.25942e-08	yes	Chr19:15408110-15417095	+	Chr19:15408110-15417095	+	-	-	-	-	GO:0005515/protein binding|GO:0005524/ATP binding|GO:0004672/protein kinase activity	GO:0006468/protein phosphorylation	PF00069 PF08263|PF00069 PF08263|PF00069 PF08263|PF00069 PF08263|PF00069 PF08263|PF00069 PF08263|PF00069 PF08263	PTHR27003 PTHR27003:SF36|PTHR27003 PTHR27003:SF36|PTHR27003 PTHR27003:SF36|PTHR27003 PTHR27003:SF36|PTHR27003 PTHR27003:SF36|PTHR27003 PTHR27003:SF36|PTHR27003 PTHR27003:SF36	EC:2.7.11.1|EC:2.7.11.1|EC:2.7.11.1|EC:2.7.11.1|EC:2.7.11.1|EC:2.7.11.1|EC:2.7.11.1	AT1G06840|AT1G06840|AT1G06840|AT1G06840|AT1G06840|AT1G06840|AT1G06840	Leucine-rich repeat protein kinase family protein|Leucine-rich repeat protein kinase family protein|Leucine-rich repeat protein kinase family protein|Leucine-rich repeat protein kinase family protein|Leucine-rich repeat protein kinase family protein|Leucine-rich repeat protein kinase family protein|Leucine-rich repeat protein kinase family protein
Potri.010G212200	93.7349	30.7076	-1.60999	1.14588e-09	3.29962e-08	yes	Chr10:20049814-20052628	-	Chr10:20049814-20052628	-	09100 Metabolism|09150 Organismal Systems|09180 Brite Hierarchies	09103 Lipid metabolism|09152 Endocrine system|09156 Nervous system|09159 Environmental adaptation|09181 Protein families: metabolism	ko00561 Glycerolipid metabolism|ko04923 Regulation of lipolysis in adipocytes|ko04723 Retrograde endocannabinoid signaling|ko04714 Thermogenesis|ko01002 Peptidases and inhibitors	-	-	-	PF12695	PTHR11614 PTHR11614:SF92	EC:2.3.1.22	AT2G39400	alpha/beta-Hydrolases superfamily protein
Potri.013G152400	119.772	47.0598	-1.34772	1.14803e-09	3.30269e-08	yes	Chr13:14829415-14832802	-	Chr13:14829415-14832802	-	09190 Not Included in Pathway or Brite	09191 Unclassified: metabolism	ko99980 Enzymes with EC numbers	GO:0048046/apoplast|GO:0005618/cell wall	GO:0016762/xyloglucan:xyloglucosyl transferase activity|GO:0004553/hydrolase activity, hydrolyzing O-glycosyl compounds	GO:0006073/cellular glucan metabolic process|GO:0005975/carbohydrate metabolic process	PF00722 PF06955	PTHR31062 PTHR31062:SF11	EC:2.4.1.207	AT4G03210	xyloglucan endotransglucosylase/hydrolase 9
Potri.001G011200	18.4477	78.8289	2.09528	1.16365e-09	3.34444e-08	yes	Chr01:724585-726358	-	Chr01:724585-726358	-	09100 Metabolism	09110 Biosynthesis of other secondary metabolites	ko00940 Phenylpropanoid biosynthesis	-	GO:0020037/heme binding|GO:0004601/peroxidase activity	GO:0055114/oxidation-reduction process|GO:0006979/response to oxidative stress	PF00141	PTHR31388 PTHR31388:SF22	EC:1.11.1.7	AT2G38380	Peroxidase superfamily protein
Potri.004G179100	59.5483	11.976	-2.31392	1.21537e-09	3.4898e-08	yes	Chr04:19333911-19338953	-	Chr04:19333911-19338953	-	-	-	-	-	GO:0005524/ATP binding|GO:0016597/amino acid binding|GO:0004672/protein kinase activity	GO:0008152/metabolic process|GO:0006468/protein phosphorylation	PF07714	PTHR23257 PTHR23257:SF347	EC:2.7.12.1
Potri.017G028200	8.9543	57.6277	2.68611	1.2243e-09	3.51212e-08	yes	Chr17:1867358-1869625	+	Chr17:1867358-1869625	+	-	-	-	-	GO:0020037/heme binding|GO:0009055/electron transfer activity|GO:0016705/oxidoreductase activity, acting on paired donors, with incorporation or reduction of molecular oxygen	GO:0055114/oxidation-reduction process	PF00067	PTHR24298 PTHR24298:SF155
Potri.012G011700	44.3026	5.15639	-3.10296	1.2282e-09	3.51999e-08	yes	Chr12:1310795-1321908	-	Chr12:1310795-1321908	-	09100 Metabolism	09102 Energy metabolism|09105 Amino acid metabolism	ko00910 Nitrogen metabolism|ko00250 Alanine, aspartate and glutamate metabolism	-	GO:0050660/flavin adenine dinucleotide binding	GO:0055114/oxidation-reduction process|GO:0006537/glutamate biosynthetic process|GO:0006807/nitrogen compound metabolic process	PF00310 PF01493 PF01645 PF04898 PF07992 PF14691|PF00310 PF01493 PF01645 PF04898 PF07992 PF14691|PF01493 PF01645 PF04898 PF07992 PF14691	PTHR11938 PTHR11938:SF109|PTHR11938 PTHR11938:SF109|PTHR11938 PTHR11938:SF109	EC:1.4.1.14|EC:1.4.1.14|EC:1.4.1.14	AT5G53460|AT5G53460|AT5G53460	NADH-dependent glutamate synthase 1|NADH-dependent glutamate synthase 1|NADH-dependent glutamate synthase 1
Potri.014G101700	17.617	76.8305	2.12471	1.32373e-09	3.79022e-08	yes	Chr14:6724728-6725275	+	Chr14:6724728-6725275	+	-	-	-	-	-	-	PF13833	PTHR10891 PTHR10891:SF624		AT2G46600	Calcium-binding EF-hand family protein
Potri.002G252400	0	35.0426	6.13104	1.32889e-09	3.80141e-08	yes	Chr02:24141930-24142726	+	Chr02:24141930-24142726	+	-	-	-	-	-	-
Potri.012G125200	41.8601	4.24716	-3.30101	1.34532e-09	3.84116e-08	yes	Chr12:14208227-14209146	+	Chr12:14208227-14209146	+	-	-	-	-	-	-
Potri.009G087500	34.4851	1.48733	-4.53518	1.34597e-09	3.83943e-08	yes	Chr09:8147225-8149849	-	Chr09:8147225-8149849	-	-	-	-	-	GO:0005515/protein binding	-	PF00564 PF02042|PF00564 PF02042|PF00564 PF02042	PTHR32002 PTHR32002:SF3|PTHR32002 PTHR32002:SF3|PTHR32002 PTHR32002:SF3
Potri.013G060800	10.7187	61.5911	2.5226	1.38879e-09	3.95786e-08	yes	Chr13:4461724-4463456	-	Chr13:4461724-4463456	-	-	-	-	-	-	-	PF01357 PF03330	PTHR31867 PTHR31867:SF28
Potri.001G169000	0	43.331	8.98404	1.41583e-09	4.03114e-08	yes	Chr01:14419052-14419834	-	Chr01:14419052-14419834	-	-	-	-	-	GO:0045735/nutrient reservoir activity	-	PF07883	PTHR31238 PTHR31238:SF21
Potri.011G070100	52.1582	8.64118	-2.59359	1.43812e-09	4.09076e-08	yes	Chr11:6181181-6183296	+	Chr11:6181181-6183296	+	-	-	-	-	GO:0043565/sequence-specific DNA binding|GO:0003700/DNA binding transcription factor activity	GO:0006355/regulation of transcription, DNA-templated	PF03106	PTHR31282 PTHR31282:SF9		AT1G29280	WRKY DNA-binding protein 65
Potri.001G407800	0	36.2949	7.1539	1.50929e-09	4.28921e-08	yes	Chr01:43513873-43521056	+	Chr01:43513873-43521056	+	-	-	-	-	-	-	PF00027 PF00520	PTHR10217 PTHR10217:SF476		AT5G54250	cyclic nucleotide-gated cation channel 4
Potri.007G112700	122.287	49.246	-1.3122	1.58461e-09	4.49904e-08	yes	Chr07:13366605-13369588	-	Chr07:13366605-13369588	-	-	-	-	-	GO:0016787/hydrolase activity	-	PF12695	PTHR17630 PTHR17630:SF52
Potri.002G108000	167.442	80.5486	-1.05573	1.6543e-09	4.69254e-08	yes	Chr02:8048994-8054111	-	Chr02:8048994-8054111	-	09130 Environmental Information Processing	09132 Signal transduction	ko04075 Plant hormone signal transduction	GO:0005634/nucleus	-	GO:0006355/regulation of transcription, DNA-templated	PF02309|PF02309	PTHR31734 PTHR31734:SF18|PTHR31734 PTHR31734:SF18		AT5G65670|AT5G65670	indole-3-acetic acid inducible 9|indole-3-acetic acid inducible 9
Potri.007G043800	136.72	59.0148	-1.21208	1.65704e-09	4.69593e-08	yes	Chr07:3760942-3763045	-	Chr07:3760942-3763045	-	09180 Brite Hierarchies	09182 Protein families: genetic information processing	ko03000 Transcription factors	GO:0005634/nucleus	GO:0043565/sequence-specific DNA binding|GO:0003700/DNA binding transcription factor activity	GO:0006355/regulation of transcription, DNA-templated	PF00447	PTHR10015 PTHR10015:SF166		AT4G36990	heat shock factor 4
Potri.001G388900	9.6844	58.7657	2.60124	1.69693e-09	4.8045e-08	yes	Chr01:41095240-41097403	+	Chr01:41095240-41097403	+	09100 Metabolism	09105 Amino acid metabolism|09110 Biosynthesis of other secondary metabolites	ko00350 Tyrosine metabolism|ko00950 Isoquinoline alkaloid biosynthesis	-	GO:0016491/oxidoreductase activity|GO:0004097/catechol oxidase activity	GO:0055114/oxidation-reduction process	PF00264 PF12142 PF12143	PTHR11474 PTHR11474:SF33	EC:1.10.3.1
Potri.001G079000	3.14465	41.464	3.72089	1.71443e-09	4.84953e-08	yes	Chr01:6280523-6287503	-	Chr01:6280523-6287503	-	-	-	-	GO:0016021/integral component of membrane	GO:0009055/electron transfer activity|GO:0005506/iron ion binding|GO:0016491/oxidoreductase activity|GO:0050660/flavin adenine dinucleotide binding	GO:0055114/oxidation-reduction process	PF01794 PF08022 PF08030	PTHR11972	EC:1.16.1.7	AT5G49740	ferric reduction oxidase 7
Potri.004G049800	46.0055	6.12321	-2.90945	1.802e-09	5.0925e-08	yes	Chr04:4030772-4031592	-	Chr04:4030772-4031592	-	09180 Brite Hierarchies	09182 Protein families: genetic information processing	ko03110 Chaperones and folding catalysts	-	GO:0015035/protein disulfide oxidoreductase activity|GO:0009055/electron transfer activity	GO:0045454/cell redox homeostasis	PF00462	PTHR10168 PTHR10168:SF69	EC:1.8.1.9	AT1G28480	Thioredoxin superfamily protein
Potri.003G097300	100.919	35.7872	-1.49568	1.87173e-09	5.28464e-08	yes	Chr03:12317285-12321260	-	Chr03:12317285-12321260	-	09190 Not Included in Pathway or Brite	09191 Unclassified: metabolism	ko99980 Enzymes with EC numbers	GO:0048046/apoplast|GO:0005618/cell wall	GO:0016762/xyloglucan:xyloglucosyl transferase activity|GO:0004553/hydrolase activity, hydrolyzing O-glycosyl compounds	GO:0006073/cellular glucan metabolic process|GO:0005975/carbohydrate metabolic process	PF00722 PF06955	PTHR31062 PTHR31062:SF16	EC:2.4.1.207	AT1G32170	xyloglucan endotransglucosylase/hydrolase 30
Potri.005G060200	42.6036	0	-9.2638	1.87867e-09	5.29931e-08	yes	Chr05:3805912-3808699	+	Chr05:3805912-3808699	+	09100 Metabolism	09101 Carbohydrate metabolism|09103 Lipid metabolism|09105 Amino acid metabolism	ko00010 Glycolysis / Gluconeogenesis|ko00071 Fatty acid degradation|ko00592 alpha-Linolenic acid metabolism|ko00350 Tyrosine metabolism	-	GO:0008270/zinc ion binding|GO:0016491/oxidoreductase activity	GO:0055114/oxidation-reduction process	PF00107 PF08240	PTHR11695 PTHR11695:SF576	EC:1.1.1.1	AT1G77120	alcohol dehydrogenase 1
Potri.001G249200	2.58642	39.6099	3.93683	1.88781e-09	5.32017e-08	yes	Chr01:26528571-26533457	+	Chr01:26528571-26533457	+	09100 Metabolism	09108 Metabolism of cofactors and vitamins	ko00730 Thiamine metabolism	-	-	GO:0009228/thiamine biosynthetic process	PF01964|PF01964	PTHR30557 PTHR30557:SF1|PTHR30557 PTHR30557:SF1	EC:4.1.99.17|EC:4.1.99.17	AT2G29630|AT2G29630	thiaminC|thiaminC
Potri.002G088300	14.1426	68.6602	2.27943	1.91692e-09	5.39721e-08	yes	Chr02:6381961-6383355	-	Chr02:6381961-6383355	-	09120 Genetic Information Processing|09180 Brite Hierarchies	09122 Translation|09182 Protein families: genetic information processing	ko03010 Ribosome|ko03011 Ribosome	GO:0005840/ribosome|GO:0005622/intracellular	GO:0003723/RNA binding|GO:0003735/structural constituent of ribosome	GO:0006412/translation	PF00416	PTHR10871		AT5G14320	Ribosomal protein S13/S18 family
Potri.016G006500	5.83023	48.8406	3.06645	1.92926e-09	5.42692e-08	yes	Chr16:318035-322100	-	Chr16:318035-322100	-	-	-	-	-	-	GO:0055085/transmembrane transport	PF03169	PTHR22601 PTHR22601:SF2		AT4G16370	oligopeptide transporter
Potri.006G107600	51.4849	8.57752	-2.58552	1.94613e-09	5.46931e-08	yes	Chr06:8341114-8343646	+	Chr06:8341114-8343646	+	-	-	-	GO:0000151/ubiquitin ligase complex	GO:0005515/protein binding|GO:0004842/ubiquitin-protein transferase activity	GO:0016567/protein ubiquitination	PF04564	PTHR23315 PTHR23315:SF63	EC:6.3.2.19	AT5G01830	ARM repeat superfamily protein
Potri.007G086000	47.2399	6.72013	-2.81344	1.99202e-09	5.59311e-08	yes	Chr07:11081084-11081737	+	Chr07:11081084-11081737	+	-	-	-	-	-	-		PTHR36067 PTHR36067:SF1		AT5G65207
Potri.014G154200	9.50096	57.972	2.60921	2.04375e-09	5.73306e-08	yes	Chr14:10834276-10837177	+	Chr14:10834276-10837177	+	09100 Metabolism	09102 Energy metabolism	ko00920 Sulfur metabolism	-	GO:0003824/catalytic activity	GO:0008152/metabolic process	PF01507|PF01507	PTHR23293 PTHR23293:SF11|PTHR23293 PTHR23293:SF11	EC:1.8.4.10|EC:1.8.4.10
Potri.013G119800	0	34.1637	6.09439	2.11195e-09	5.91891e-08	yes	Chr13:12863974-12865902	-	Chr13:12863974-12865902	-	09100 Metabolism|09150 Organismal Systems	09103 Lipid metabolism|09159 Environmental adaptation	ko00062 Fatty acid elongation|ko04626 Plant-pathogen interaction	GO:0016020/membrane	GO:0016747/transferase activity, transferring acyl groups other than amino-acyl groups	GO:0006633/fatty acid biosynthetic process	PF08392 PF08541	PTHR31561 PTHR31561:SF24	EC:2.3.1.199	AT5G04530	3-ketoacyl-CoA synthase 19
Potri.003G216700	22.712	86.0865	1.92233	2.1138e-09	5.91865e-08	yes	Chr03:21236689-21239028	+	Chr03:21236689-21239028	+	-	-	-	-	-	-		PTHR37229		AT3G32930
Potri.009G148900	2.86498	40.2544	3.81255	2.12402e-09	5.94179e-08	yes	Chr09:11764562-11765635	+	Chr09:11764562-11765635	+	-	-	-	GO:0005576/extracellular region	GO:0008083/growth factor activity	GO:0008283/cell proliferation	PF06404	PTHR33285 PTHR33285:SF2		AT3G44735	PHYTOSULFOKINE 3 PRECURSOR
Potri.004G138400	2.29286	38.4939	4.06941	2.14189e-09	5.98627e-08	yes	Chr04:16018191-16025144	-	Chr04:16018191-16025144	-	09100 Metabolism	09108 Metabolism of cofactors and vitamins	ko00860 Porphyrin and chlorophyll metabolism	-	-	-	PF00504 PF00762|PF00504 PF00762	PTHR11108 PTHR11108:SF5|PTHR11108 PTHR11108:SF5	EC:4.99.1.1|EC:4.99.1.1	AT2G30390|AT2G30390	ferrochelatase 2|ferrochelatase 2
Potri.001G367400	50.1808	8.06561	-2.63728	2.14219e-09	5.98161e-08	yes	Chr01:38354247-38363109	+	Chr01:38354247-38363109	+	09180 Brite Hierarchies	09182 Protein families: genetic information processing	ko03036 Chromosome and associated proteins	-	-	-	PF08766	PTHR13468 PTHR13468:SF1|PTHR13468 PTHR13468:SF1		AT5G55660|AT5G55660	DEK domain-containing chromatin associated protein|DEK domain-containing chromatin associated protein
Potri.007G108601	34.9288	1.94997	-4.1629	2.19175e-09	6.11438e-08	yes	Chr07:13090739-13093454	-	Chr07:13090739-13093454	-	09100 Metabolism	09101 Carbohydrate metabolism|09103 Lipid metabolism|09105 Amino acid metabolism	ko00010 Glycolysis / Gluconeogenesis|ko00071 Fatty acid degradation|ko00592 alpha-Linolenic acid metabolism|ko00350 Tyrosine metabolism	-	-	-	PF00107 PF08240	PTHR11695 PTHR11695:SF576	EC:1.1.1.1	AT1G77120	alcohol dehydrogenase 1
Potri.002G260300	0	33.9918	5.7621	2.25852e-09	6.29489e-08	yes	Chr02:24871606-24873591	-	Chr02:24871606-24873591	-	-	-	-	-	GO:0008168/methyltransferase activity	-	PF04072|PF04072	PTHR13600 PTHR13600:SF12|PTHR13600 PTHR13600:SF12		AT5G42760|AT5G42760	Leucine carboxyl methyltransferase|Leucine carboxyl methyltransferase
Potri.014G131800	37.3331	2.86221	-3.70525	2.30681e-09	6.42358e-08	yes	Chr14:8813288-8813884	-	Chr14:8813288-8813884	-	-	-	-	-	-	-	PF05498	PTHR33136 PTHR33136:SF4		AT1G02900	rapid alkalinization factor 1
Potri.004G109166	104.908	38.6154	-1.44188	2.32696e-09	6.47376e-08	yes	Chr04:9728497-9731648	+	Chr04:9728497-9731648	+	09100 Metabolism	09101 Carbohydrate metabolism|09106 Metabolism of other amino acids|09110 Biosynthesis of other secondary metabolites	ko00500 Starch and sucrose metabolism|ko00460 Cyanoamino acid metabolism|ko00940 Phenylpropanoid biosynthesis	-	-	-	PF00232	PTHR10353 PTHR10353:SF37	EC:3.2.1.21	AT2G44490	Glycosyl hydrolase superfamily protein
Potri.014G037000	16.1459	72.4712	2.16624	2.42022e-09	6.72707e-08	yes	Chr14:2334693-2335765	+	Chr14:2334693-2335765	+	-	-	-	-	-	-	PF08041|PF08041	PTHR34951|PTHR34951 PTHR34951:SF1		AT2G26500|AT2G26500	cytochrome b6f complex subunit (petM), putative|cytochrome b6f complex subunit (petM), putative
Potri.001G301100	7.51686	52.7559	2.81113	2.47097e-09	6.86184e-08	yes	Chr01:31164821-31166975	+	Chr01:31164821-31166975	+	09130 Environmental Information Processing|09140 Cellular Processes|09160 Human Diseases|09180 Brite Hierarchies	09132 Signal transduction|09141 Transport and catabolism|09171 Infectious disease: bacterial|09182 Protein families: genetic information processing|09183 Protein families: signaling and cellular processes	ko04072 Phospholipase D signaling pathway|ko04144 Endocytosis|ko05110 Vibrio cholerae infection|ko05130 Pathogenic Escherichia coli infection|ko05131 Shigellosis|ko05134 Legionellosis|ko04131 Membrane trafficking|ko04147 Exosome|ko04031 GTP-binding proteins	-	-	-		PTHR14154 PTHR14154:SF18		AT4G34190	stress enhanced protein 1
Potri.008G151100	7.64179	53.0684	2.79587	2.4724e-09	6.85956e-08	yes	Chr08:10329483-10334436	-	Chr08:10329483-10334436	-	-	-	-	GO:0016021/integral component of membrane	GO:0022857/transmembrane transporter activity	GO:0055085/transmembrane transport	PF07690	PTHR23500 PTHR23500:SF70		AT5G26340	Major facilitator superfamily protein
Potri.011G162856	33.5839	1.52681	-4.45918	2.49653e-09	6.92018e-08	yes	Chr11:18744275-18746158	+	Chr11:18744275-18746158	+	-	-	-	-	-	-	PF01565 PF08031	PTHR32448 PTHR32448:SF30	EC:1.3.3.8	AT5G44410	FAD-binding Berberine family protein
Potri.011G047200	35.8027	2.34735	-3.93097	2.50009e-09	6.92374e-08	yes	Chr11:3742391-3743444	-	Chr11:3742391-3743444	-	09100 Metabolism	09105 Amino acid metabolism|09110 Biosynthesis of other secondary metabolites	ko00350 Tyrosine metabolism|ko00950 Isoquinoline alkaloid biosynthesis	-	GO:0004097/catechol oxidase activity	GO:0055114/oxidation-reduction process	PF12143	PTHR36608 PTHR36608:SF1	EC:1.10.3.1
Potri.007G128600	58.3888	12.0816	-2.27288	2.55333e-09	7.06477e-08	yes	Chr07:14372329-14373540	+	Chr07:14372329-14373540	+	09150 Organismal Systems	09159 Environmental adaptation	ko04626 Plant-pathogen interaction	-	-	-	PF13499	PTHR10891 PTHR10891:SF642		AT2G43290	Calcium-binding EF-hand family protein
Potri.001G186800	0	33.9256	5.40349	2.6222e-09	7.24871e-08	yes	Chr01:16668308-16670138	-	Chr01:16668308-16670138	-	-	-	-	-	GO:0009055/electron transfer activity|GO:0051536/iron-sulfur cluster binding	-	PF00111	PTHR23426 PTHR23426:SF27		AT3G16250	NDH-dependent cyclic electron flow 1
Potri.015G008000	20.362	80.9151	1.99053	2.66628e-09	7.36387e-08	yes	Chr15:473992-475873	-	Chr15:473992-475873	-	-	-	-	-	-	-	PF00581	PTHR12231 PTHR12231:SF112		AT4G27700	Rhodanese/Cell cycle control phosphatase superfamily protein
Potri.005G213500	1.46077	35.4862	4.60245	2.81494e-09	7.76741e-08	yes	Chr05:21701914-21707099	-	Chr05:21701914-21707099	-	09180 Brite Hierarchies	09183 Protein families: signaling and cellular processes	ko02000 Transporters	GO:0016021/integral component of membrane	GO:0005215/transporter activity	GO:0055085/transmembrane transport	PF00916 PF01740	PTHR11814 PTHR11814:SF60		AT3G51895	sulfate transporter 3;1
Potri.008G204900	3.5709	41.7765	3.54833	2.96905e-09	8.18521e-08	yes	Chr08:14977187-14979033	+	Chr08:14977187-14979033	+	09100 Metabolism	09108 Metabolism of cofactors and vitamins	ko00860 Porphyrin and chlorophyll metabolism	-	GO:0003854/3-beta-hydroxy-delta5-steroid dehydrogenase activity|GO:0016616/oxidoreductase activity, acting on the CH-OH group of donors, NAD or NADP as acceptor|GO:0016491/oxidoreductase activity|GO:0050662/coenzyme binding	GO:0055114/oxidation-reduction process|GO:0044237/cellular metabolic process|GO:0006694/steroid biosynthetic process	PF05368	PTHR14194 PTHR14194:SF36	EC:1.3.1.75	AT5G18660	NAD(P)-binding Rossmann-fold superfamily protein
Potri.005G200900	0	33.4992	6.06606	3.00151e-09	8.2672e-08	yes	Chr05:20673890-20675754	-	Chr05:20673890-20675754	-	-	-	-	-	-	-		PTHR33210 PTHR33210:SF6|PTHR33210 PTHR33210:SF6		AT2G42840|AT2G42840	protodermal factor 1|protodermal factor 1
Potri.002G053000	4.72612	45.0045	3.25134	3.07609e-09	8.46494e-08	yes	Chr02:3584998-3587809	-	Chr02:3584998-3587809	-	-	-	-	-	GO:0050662/coenzyme binding|GO:0003824/catalytic activity	GO:0044237/cellular metabolic process	PF01370	PTHR10366 PTHR10366:SF278		AT3G63140	chloroplast stem-loop binding protein of 41 kDa
Potri.001G438800	23.9077	87.556	1.87273	3.07825e-09	8.46323e-08	yes	Chr01:46480744-46482987	+	Chr01:46480744-46482987	+	09100 Metabolism|09180 Brite Hierarchies	09102 Energy metabolism|09181 Protein families: metabolism	ko00195 Photosynthesis|ko00194 Photosynthesis proteins	GO:0042651/thylakoid membrane|GO:0009654/photosystem II oxygen evolving complex	-	GO:0015979/photosynthesis	PF04725	PTHR34369 PTHR34369:SF2		AT1G79040	photosystem II subunit R
Potri.009G137600	18.0346	75.8706	2.07278	3.10195e-09	8.5207e-08	yes	Chr09:11073228-11077148	-	Chr09:11073228-11077148	-	-	-	-	-	-	-	PF11833	PTHR33372 PTHR33372:SF5		AT2G20920	Protein of unknown function (DUF3353)
Potri.012G120280	1.44807	35.2739	4.6064	3.11621e-09	8.55214e-08	yes	Chr12:13805870-13806976	+	Chr12:13805870-13806976	+	-	-	-	-	-	-	PF14299	PTHR32278 PTHR32278:SF8		AT1G31200	phloem protein 2-A9
Potri.009G062500	11.603	61.9926	2.4176	3.19057e-09	8.74044e-08	yes	Chr09:6417013-6418646	-	Chr09:6417013-6418646	-	-	-	-	GO:0019898/extrinsic component of membrane|GO:0009654/photosystem II oxygen evolving complex	GO:0005509/calcium ion binding	GO:0015979/photosynthesis	PF01789	PTHR31407 PTHR31407:SF20		AT3G63540	Mog1/PsbP/DUF1795-like photosystem II reaction center PsbP family protein
Potri.001G069650	40.0646	0	-9.0185	3.22571e-09	8.82876e-08	yes	Chr01:5247538-5253011	+	Chr01:5247538-5253011	+	09180 Brite Hierarchies	09183 Protein families: signaling and cellular processes	ko02000 Transporters	-	-	-	PF02705	PTHR30540 PTHR30540:SF7		AT4G13420	high affinity K+ transporter 5
Potri.010G061600	37.0866	2.99278	-3.63134	3.33951e-09	9.13199e-08	yes	Chr10:9119915-9121220	+	Chr10:9119915-9121220	+	09100 Metabolism|09150 Organismal Systems|09160 Human Diseases|09180 Brite Hierarchies	09106 Metabolism of other amino acids|09111 Xenobiotics biodegradation and metabolism|09149 Aging|09161 Cancer: overview|09162 Cancer: specific types|09166 Cardiovascular disease|09176 Drug resistance: antineoplastic|09183 Protein families: signaling and cellular processes	ko00480 Glutathione metabolism|ko00980 Metabolism of xenobiotics by cytochrome P450|ko00982 Drug metabolism - cytochrome P450|ko00983 Drug metabolism - other enzymes|ko04212 Longevity regulating pathway - worm|ko05200 Pathways in cancer|ko05204 Chemical carcinogenesis|ko05225 Hepatocellular carcinoma|ko05418 Fluid shear stress and atherosclerosis|ko01524 Platinum drug resistance|ko02000 Transport…	-	GO:0005515/protein binding	-	PF13410 PF13417	PTHR11260 PTHR11260:SF327	EC:2.5.1.18
Potri.019G116800	113.694	232.36	1.03121	3.36241e-09	9.18635e-08	yes	Chr19:14361879-14362148	-	Chr19:14361879-14362148	-	-	-	-	-	-	-	PF12609	PTHR33090		AT4G10265	Wound-responsive family protein
Potri.014G024000	0	33.4243	5.26641	3.73371e-09	1.01916e-07	yes	Chr14:1438335-1440753	+	Chr14:1438335-1440753	+	-	-	-	-	-	-	PF14215	PTHR13902 PTHR13902:SF64
Potri.006G014500	130.763	56.4689	-1.21142	3.78887e-09	1.03329e-07	yes	Chr06:919003-919574	+	Chr06:919003-919574	+	09150 Organismal Systems|09180 Brite Hierarchies	09154 Digestive system|09181 Protein families: metabolism|09183 Protein families: signaling and cellular processes	ko04970 Salivary secretion|ko01002 Peptidases and inhibitors|ko04147 Exosome	-	GO:0004869/cysteine-type endopeptidase inhibitor activity	-	PF00031	PTHR11413 PTHR11413:SF26		AT5G47550	Cystatin/monellin superfamily protein
Potri.005G221000	32.0759	0	-6.78125	3.93302e-09	1.07164e-07	yes	Chr05:22305142-22306082	+	Chr05:22305142-22306082	+	-	-	-	-	GO:0004867/serine-type endopeptidase inhibitor activity	GO:0009611/response to wounding	PF00280	PTHR33091 PTHR33091:SF13
Potri.012G089900	1.91141	36.2397	4.24486	4.03097e-09	1.09735e-07	yes	Chr12:11505083-11520952	+	Chr12:11505083-11520952	+	-	-	-	-	GO:0020037/heme binding|GO:0009055/electron transfer activity|GO:0016705/oxidoreductase activity, acting on paired donors, with incorporation or reduction of molecular oxygen	GO:0055114/oxidation-reduction process	PF00067|PF00067	PTHR24298 PTHR24298:SF151|PTHR24298 PTHR24298:SF151	EC:1.14.13.121|EC:1.14.13.121
Potri.010G209400	59.6139	13.1334	-2.18241	4.08541e-09	1.11117e-07	yes	Chr10:19888902-19889688	-	Chr10:19888902-19889688	-	-	-	-	-	-	-	PF13912	PTHR26374 PTHR26374:SF207		AT2G28710	C2H2-type zinc finger family protein
Potri.010G096000	0	38.3722	8.45978	4.33195e-09	1.17718e-07	yes	Chr10:11978366-11979335	+	Chr10:11978366-11979335	+	-	-	-	-	-	GO:0009607/response to biotic stimulus|GO:0006952/defense response	PF10604	PTHR31907 PTHR31907:SF1		AT1G24020	MLP-like protein 423
Potri.014G167300	9.86839	57.3904	2.53992	4.34538e-09	1.17977e-07	yes	Chr14:12147692-12148676	+	Chr14:12147692-12148676	+	-	-	-	-	-	-		PTHR36343 PTHR36343:SF1		AT2G05310
Potri.015G120100	0	33.186	5.20956	4.42184e-09	1.19946e-07	yes	Chr15:13445008-13446066	+	Chr15:13445008-13446066	+	-	-	-	-	-	-	PF14299	PTHR32278 PTHR32278:SF8		AT1G31200	phloem protein 2-A9
Potri.003G085500	0	33.4651	6.75414	4.42361e-09	1.19887e-07	yes	Chr03:11169937-11173408	-	Chr03:11169937-11173408	-	09100 Metabolism	09101 Carbohydrate metabolism	ko00500 Starch and sucrose metabolism	-	GO:0016161/beta-amylase activity	GO:0000272/polysaccharide catabolic process	PF01373	PTHR31352 PTHR31352:SF1	EC:3.2.1.2	AT4G17090	chloroplast beta-amylase
[truncated: 2,302 more rows]

## Sheet: Table 1-2
Supplemental Table S1: DEG list of Group2.
gene	control	treat	log2(Fold_change)	p-value	q-value	significant	Pos	Strand	Pos	Strand	KEGG_A_class	KEGG_B_class	Pathway	GO Component	GO Function	GO Process	Pfam	Panther	KOG	Best-hit-arabi-name	arabi-symbol	arabi-defline
[truncated: 1,859 more rows]

## Sheet: Table 1-3
Supplemental Table S1: DEG list of Group3.
[truncated: 320 more rows]

## Sheet: Table 1-4
Supplemental Table S1: DEG list of Group4.
[truncated: 3,789 more rows]

[truncated: 7 more sheets: Table 2-1, Table 2-2, Table 2-3, Table 2-4, Table 3, Table 4, Table5]
